# Supplementary material for: Resistance Mechanisms to SYK Inhibition in Acute Myeloid Leukemia
Source: Oxford University Press journal article supplement (doi:10.1158/2159-8290.cd-19-0209), 2019-11-26
Supplement: 21598290cd190209-sup-217351_2_supp_5909799_q17lyv.xlsx [file 21598290cd190209-sup-217351_2_supp_5909799_q17lyv.xlsx]

## Sheet: Table_S1_IC50 values
Supplemental Table S1. Entospletinib IC50 values in µM in a panel of different AML cell lines.
Cell line	Entospletinib IC50 (µM)
MV4-11	0.5
CMK-86	0.75
MOLM14	0.75
MOLM13	0.84
UCSD-AML1	1.13
EOL-1	1.85
TF-1	5.41
NOMO1	6.45
HL-60	9.62
THP-1	9.71
U937	13.65
NB4	14.83

## Sheet: Table_S2_pYome_MV411
	#	Protein	Gene	Amino acid_Position_Gene names	Pathway	Mean log2 normalized H/L ratio	-log10 P-value
	1	A0A024R576	ZFPL1	Y_235_ZFPL1	Other hits down	-2.61387	1.29633
	2	B3KNF6	SEC61A1	Y_276_SEC61A1	Other hits down	-2.49237	1.79814
	3	Q92835	INPP5D	Y_1161_INPP5D	Other hits down	-2.4744	1.89051
	4	B3KM97	TECR	Y_296_TECR	Other hits down	-2.36429	2.79313
	5	K7EK35	STAT5A;STAT5B	Y_663_STAT5A;Y_663_STAT5B	Other hits down	-2.29567	1.81073
	6	Q8TF42	UBASH3B	Y_19_UBASH3B	Other hits down	-2.10392	1.76472
	7	V9HWJ7	HEL-S-37;LCP1	Y_48_HEL-S-37;Y_48_LCP1	Other hits down	-2.06338	1.72375
	8	Q9Y5K6	CD2AP	Y_361_CD2AP	Other hits down	-2.04188	1.50142
	9	A0A0A0MRF9	PLCG2	Y_495_PLCG2	Other hits down	-2.02458	2.59395
	10	Q96IN2	GUK1	Y_38_GUK1	Other hits down	-1.99741	2.18533
	11	Q8J014	LOC392781;OK/KNS-cl.6;rps2;RPS2	Y_206_LOC392781;Y_206_OK/KNS-cl.6;Y_206_rps2;Y_206_RPS2	Other hits down	-1.98829	1.36027
	12	O15357	INPPL1	Y_1162_INPPL1	Other hits down	-1.94578	1.78721
	13	A8K3M3	PTPN1	Y_46_PTPN1	Other hits down	-1.93541	1.61748
	14	B2R8B5	VAV1	Y_658_VAV1	Other hits down	-1.9184	1.71733
	15	O15357	INPPL1	S_1003_INPPL1	Other hits down	-1.9155	1.83346
	16	A8K7L8	LSP1	Y_256_LSP1	Other hits down	-1.91387	1.75171
	17	A0A024R811	LACTB2	Y_213_LACTB2	Other hits down	-1.90138	2.68295
	18	Q9BQD2	STAT6;STAT6B	Y_641_STAT6;Y_641_STAT6B	Other hits down	-1.83502	1.78269
	19	Q24JU4	eIF3a;EIF3A	Y_4_eIF3a;Y_4_EIF3A	Other hits down	-1.83465	1.49445
	20	M0QZC5	RPS11	Y_55_RPS11	Other hits down	-1.82099	1.81904
	21	B5BTZ6	STAT3	Y_704_STAT3	Other hits down	-1.7361	1.72433
	22	A0A024QYX8	WAS	Y_212_WAS	Other hits down	-1.73218	1.55359
	23	A0A024R328	PRKCD	S_304_PRKCD	Other hits down	-1.67339	1.97547
	24	G8JLH9	STAT3	Y_607_STAT3	Other hits down	-1.66996	1.53241
	25	Q5HY57	EMD	Y_132_EMD	Other hits down	-1.66847	2.06376
	26	B4DNE5			Other hits down	-1.64902	1.33108
	27	Q06124	PTPN11	Y_546_PTPN11	RAS/MAPK/ERK signaling	-1.59206	2.31561
	28	Q6ZUJ8	PIK3AP1	Y_570_PIK3AP1	Other hits down	-1.5668	1.89678
	29	O15357	INPPL1	Y_986_INPPL1	Other hits down	-1.531	1.73593
	30	I0EZ74	RETSAT	Y_67_RETSAT	Other hits down	-1.4945	1.60716
	31	J3KNB3	DAPP1	Y_139_DAPP1	Other hits down	-1.40634	1.78754
	32	E9PIZ0	YIF1A	Y_3_YIF1A	Other hits down	-1.37759	1.33395
	33	A0A0U1RR39	CBL	Y_630_CBL	Other hits down	-1.33703	1.91651
	34	B4DL02	SHC1	Y_364_SHC1	Other hits down	-1.32943	1.52939
	35	Q53G99	ACTA1;ACTA2;ACTB;ACTC1;ACTG1;ACTG2;PS1TP5BP1	Y_53_ACTA1;Y_53_ACTA2;Y_53_ACTB;Y_53_ACTC1;Y_53_ACTG1;Y_53_ACTG2;Y_53_PS1TP5BP1	Other hits down	-1.30267	1.58679
	36	V9HWJ7	HEL-S-37;LCP1	Y_28_HEL-S-37;Y_28_LCP1	Other hits down	-1.27133	1.78389
	37	Q5HYI5	RAB2B	Y_3_RAB2B	Other hits down	-1.26784	2.21992
	38	B4DVF0	PTPN7	Y_73_PTPN7	Other hits down	-1.26537	2.08342
	39	Q5HY57	EMD	Y_126_EMD	Other hits down	-1.23289	1.5683
	40	A9UEZ6	BCR;BCR/ABL fusion	Y_177_BCR;Y_177_BCR/ABL fusion	Other hits down	-1.19174	2.8327
	41	X5D963	MTMR10	Y_708_MTMR10	Other hits down	-1.18134	1.34872
	42	A8K7W1	DOK2	Y_299_DOK2	Other hits down	-1.17553	1.48164
	43	A0A024QZU0	RIPK1	Y_426_RIPK1	Other hits down	-1.16713	1.98525
	44	Q6ZUJ8	FLJ00308;PIK3AP1	Y_694_FLJ00308;Y_694_PIK3AP1	Other hits down	-1.14809	1.85488
	45	B4E1E2	HGS	Y_286_HGS	Other hits down	-1.13454	2.03177
	46	Q53G99	ACTB;ACTG1;HEL-176;PS1TP5BP1	Y_198_ACTB;Y_198_ACTG1;Y_198_HEL-176;Y_198_PS1TP5BP1	Other hits down	-1.12734	1.55272
	47	A8K4G3	HCK	Y_310_HCK	Other hits down	-1.11559	1.66089
	48	A0A0A0MRF9	PLCG2	Y_759_PLCG2	Other hits down	-1.11402	1.3094
	49	A0A0U1RR39	CBL	Y_656_CBL	Other hits down	-1.11271	1.62396
	50	Q92835	INPP5D	S_1024_INPP5D	Other hits down	-1.10455	1.3653
	51	V9HW65	ANXA2;ANXA2P2;HEL-S-270	Y_30_ANXA2;Y_30_ANXA2P2;Y_30_HEL-S-270	Other hits down	-1.08089	1.36401
	52	A0A024R1U4	RAB5A;RAB5B;RAB5C	Y_83_RAB5A;Y_83_RAB5B;Y_83_RAB5C	Other hits down	-1.07899	1.42431
	53	A8MZ84	LAIR1	S_250_LAIR1	Other hits down	-1.05	1.81147
	54	A8KAH1	PTDSS1	Y_274_PTDSS1	Other hits down	-1.02953	1.4723
	55	A0A024R328	PRKCD	Y_313_PRKCD	Other hits down	-1.02581	2.24161
	56	F8W0B3	HVCN1	Y_35_HVCN1	Other hits down	-1.02441	2.31254
	57	Q92835	INPP5D	Y_611_INPP5D	Other hits down	-1.02431	1.49707
	58	A0A0U1RR39	CBL	T_654_CBL	RAS/MAPK/ERK signaling	-1.01979	2.12518
	59	A8K4G3	HCK	Y_107_HCK	Other hits down	-0.998295	1.74928
	60	Q2TA81	DOK1	Y_195_DOK1	Other hits down	-0.993826	1.48162
	61	Q8IX19	MCEMP1	Y_38_MCEMP1	Other hits down	-0.982572	1.50903
	62	A0A024R328	PRKCD	Y_334_PRKCD	Other hits down	-0.949208	1.57248
	63	O75886	STAM2	S_375_STAM2	Other hits down	-0.94776	2.16016
	64	F8WFA0	SNX17	Y_20_SNX17	Other hits down	-0.917357	1.7296
	65	D3DPU2	CAP1	Y_31_CAP1	Other hits down	-0.905564	2.67011
	66	Q9H9V4	RNF122	Y_74_RNF122	Other hits down	-0.871347	2.12715
	67	Q5VU61	HEL-S-108;HEL-S-82p;TPM3;TPM3-ROS1;TPM4	Y_101_HEL-S-108;Y_101_HEL-S-82p;Y_101_TPM3;Y_101_TPM3-ROS1;Y_101_TPM4	Other hits down	-0.855621	2.49156
	68	K4RH61	MMP14	Y_573_MMP14	Other hits down	-0.832124	2.41772
	69	Q86UX7	FERMT3	Y_504_FERMT3	Other hits down	-0.822429	1.48285
	70	M0QXM4	SLC1A5	Y_348_SLC1A5	Other hits down	-0.790716	1.29702
	71	P52272	HNRNPM	Y_64_HNRNPM	Other hits down	-0.783427	2.16557
	72	E9PL79	SIGLEC10	Y_506_SIGLEC10	Other hits down	-0.776197	1.49283
	73	Q92835	INPP5D	Y_1022_INPP5D	Other hits down	-0.774469	1.76479
	74	A0A087WTT1	PABPC1;PABPC3	Y_339_PABPC1;Y_339_PABPC3	Other hits down	-0.773242	1.40711
	75	Q9NWQ8	PAG1	Y_387_PAG1	Other hits down	-0.738511	1.49658
	76	P36888	FLT3	Y_955_FLT3	Other hits down	-0.735816	1.34409
	77	Q8IZD4	DCP1B	Y_133_DCP1B	Other hits down	-0.728118	1.4092
	78	A0A024R163	PTBP3;ROD1	Y_127_PTBP3;Y_127_ROD1	Other hits down	-0.727216	1.36636
	79	Q9GZY6	LAT2	Y_136_LAT2	Other hits down	-0.706832	1.33134
	80	A8K4G2	SYK	Y_296_SYK	Other hits down	-0.705768	1.30854
	81	C9J1X3	TNK2	Y_892_TNK2	Other hits down	-0.700908	3.15973
	82	A8K6V7	G3BP2	Y_56_G3BP2	Other hits down	-0.697615	2.30602
	83	F8VQY5	ARHGAP9	Y_7_ARHGAP9	Other hits down	-0.695489	1.85272
	84	B7Z3U1	FLJ00336;SLC27A1	Y_579_FLJ00336;Y_579_SLC27A1	Other hits down	-0.691897	2.24958
	85	A0A024R1N1	MYH9	Y_11_MYH9	Other hits down	-0.685059	1.32169
	86	B4E1E2	HGS	Y_466_HGS	Other hits down	-0.684021	1.80706
	87	B5MDL5	MAPK12	Y_95_MAPK12	Other hits down	-0.680179	1.62306
	88	A0A024R7T3	HNRNPF;HNRPF	Y_210_HNRNPF;Y_210_HNRPF	Other hits down	-0.678505	1.70109
	89	A8K7G0	CLEC10A	Y_5_CLEC10A	Other hits down	-0.672191	2.43549
	90	Q9BRL5	CALM1;CALM2;CALM3	Y_100_CALM1;Y_100_CALM2;Y_100_CALM3	Other hits down	-0.670945	1.56435
	91	B7Z1X1	MLC1	Y_28_MLC1	Other hits down	-0.664417	1.71578
	92	C9J9W2	LASP1	Y_21_LASP1	Other hits down	-0.658582	1.41708
	93	A8K6L5	KHNYN;KIAA0323	Y_456_KHNYN;Y_456_KIAA0323	Other hits down	-0.651475	1.67672
	94	A0A024RD15	MAPK14	T_180_MAPK14	Other hits down	-0.639737	3.47429
	95	Q9BQ70	TCF25	Y_179_TCF25	Other hits down	-0.627812	1.31983
	96	P36888	FLT3	Y_630_FLT3	Other hits down	-0.620992	2.54445
	97	P51991	D10S102;HNRNPA3;HNRPA3	Y_188_D10S102;Y_188_HNRNPA3;Y_188_HNRPA3	Other hits down	-0.611454	1.89736
	98	E9PNX6	ARHGAP27	Y_28_ARHGAP27	Other hits down	-0.610155	2.01343
	99	P42224	STAT1	Y_701_STAT1	Other hits down	-0.603399	1.32895
	100	C9JFK9	BAG3	Y_28_BAG3	Other hits down	-0.598867	1.6286
	101	A8MZ84	LAIR1	Y_263_LAIR1	Other hits down	-0.59861	3.2025
	102	P22626	HNRNPA2B1;HNRPA2B1	Y_174_HNRNPA2B1;Y_174_HNRPA2B1	Other hits down	-0.596737	1.3367
	103	A0A024RD15	MAPK14	Y_182_MAPK14	Other hits down	-0.560158	1.5161
	104	B7Z497	FAIM3	Y_224_FAIM3	Other hits down	-0.553314	1.41063
	105	Q06124	PTPN11	Y_279_PTPN11	RAS/MAPK/ERK signaling	-0.539603	1.68976
	106	A0A024R4S1	EPN1	Y_111_EPN1	Other hits down	-0.536645	1.67456
	107	X6RGC9	TYROBP	Y_79_TYROBP	Other hits down	-0.525851	2.5542
	108	Q6IAT1	GDI2	Y_117_GDI2	Other hits down	-0.522225	1.34311
	109	B4DPV8	KCT2	Y_143_KCT2	Other hits down	-0.505161	1.95037
	110	Q96RG4	IRS2	Y_743_IRS2	Other hits up	0.678213	1.416
	111	P23526	AHCY	Y_193_AHCY	Other hits up	0.819048	1.32068
	112	P05023	ATP1A1	Y_55_ATP1A1	Other hits up	0.851558	2.08999
	113	D3DX33	hCG_1999854;PI4KA;PIK4CA variant protein	Y_1154_hCG_1999854;Y_1154_PI4KA;Y_1154_PIK4CA variant protein	Other hits up	1.17976	1.42792
	133	B4DDM8	ADAM9	T_146_ADAM9		-1.23699	0.609442
	134	B4DDM8	ADAM9	Y_154_ADAM9		-1.23699	0.609442
	11	A0A0S2Z377	ANXA6	Y_603_ANXA6		0.549691	0.847428
	102	Q10567	AP1B1	Y_277_AP1B1		-1.00976	0.95291
	174	E7EU13	ARAP1;FLJ00357	Y_492_ARAP1;Y_492_FLJ00357		-2.24882	1.02447
	119	A0A024RAS5	ARHGDIB	Y_24_ARHGDIB		-1.12446	0.728081
	22	B3KX11	CCT3	Y_336_CCT3		-0.541555	0.80107
	123	B7Z6W7	c-fgr;FGR	Y_53_c-fgr;Y_53_FGR		-1.15154	1.14616
	85	A8K7G0	CLEC10A	Y_10_CLEC10A		-0.876915	0.952961
	173	P46109	CRKL	Y_105_CRKL		-2.21561	1.14494
	71	Q2TA81	DOK1	Y_235_DOK1		-0.767427	1.24076
	127	H7C4Z0	DUSP7	Y_102_DUSP7		-1.17963	1.15469
	45	A0A024QZ77	EFHD2	Y_83_EFHD2		-0.658048	0.561042
	44	Q5U0F4	EIF3I	Y_308_EIF3I		-0.654708	1.19378
	29	Q15056	EIF4H;WBSCR1	Y_12_EIF4H;Y_12_WBSCR1		-0.562425	0.599347
	131	K9JA46	EL52;HSP90AA1;HSP90AA2P;HSP90AB1;HSP90AB2P	Y_284_EL52;Y_284_HSP90AA1;Y_284_HSP90AA2P;Y_284_HSP90AB1;Y_284_HSP90AB2P		-1.22917	0.958426
	70	Q96CS3	FAF2	Y_79_FAF2		-0.756551	1.15644
	10	Q9UQC2	GAB2	S_623_GAB2		0.594109	1.12293
	101	Q59HA5	GAK	Y_511_GAK		-1.00024	1.16821
	114	A0A024RDU9	GTF2F2	Y_196_GTF2F2		-1.08782	1.07713
	103	P14317	HCLS1	Y_222_HCLS1		-1.01352	1.15857
	14	P14317	HCLS1	Y_175_HCLS1		-0.512589	0.831439
	13	B2R5V9	HDLBP	Y_437_HDLBP		-0.507845	1.16677
	80	B0YJC4	HEL113;VIM	Y_38_HEL113;Y_38_VIM		-0.796403	0.777273
	40	F8W6I7	HNRNPA1;HNRPA1	Y_282_HNRNPA1;Y_282_HNRPA1		-0.626348	1.13517
	142	P22626	HNRNPA2B1;HNRPA2B1	Y_347_HNRNPA2B1;Y_347_HNRPA2B1		-1.38803	0.672622
	18	A0A024RD80	HSP90AB1	Y_596_HSP90AB1		-0.528099	0.527235
	143	Q92835	INPP5D	Y_915_INPP5D		-1.3953	1.13677
	109	Q53TK4	ITSN2	Y_552_ITSN2		-1.02931	1.28577
	31	Q5TBB8	LAPTM5	Y_239_LAPTM5		-0.571823	1.22335
	26	Q9GZY6	LAT2	Y_193_LAT2		-0.553049	1.032
	63	H0Y9B7	LEMD2	Y_19_LEMD2		-0.717822	1.02439
	17	Q66K21	LRP10	Y_22_LRP10		-0.527676	1.03824
	95	I3L0J8	MAPK7	Y_82_MAPK7		-0.975446	0.980897
	6	D6RF93	NFKB1	Y_34_NFKB1		0.709361	0.932233
	19	D6RDK6	OCIAD1	Y_145_OCIAD1		-0.534255	0.78416
	56	A0A087WTT1	PABPC1;PABPC4	Y_29_PABPC1;Y_29_PABPC4		-0.686334	1.259
	76	B1ANR0	PABPC4	Y_364_PABPC4		-0.78367	1.2514
	91	D3DNX8	PGRMC2	Y_17_PGRMC2		-0.929728	1.24688
	176	Q13526	PIN1	Y_23_PIN1		-2.3351	0.957084
	104	P36954	POLR2I	Y_111_POLR2I		-1.01706	1.04718
	79	Q6IQ43	PTPN9	Y_555_PTPN9		-0.791764	0.62603
	30	B4DRD2	PTTG1IP	Y_111_PTTG1IP		-0.567921	1.2599
	77	A0A087WZ13	RAVER1	Y_509_RAVER1		-0.787618	1.00974
	47	Q6R327	RICTOR	Y_863_RICTOR		-0.6641	1.03156
	90	A0A0S2Z4T5	RIN1	Y_36_RIN1		-0.925257	1.09642
	169	B4DMJ6	RPL4	Y_272_RPL4		-2.03558	1.07146
	25	Q8NC51	SERBP1	Y_207_SERBP1		-0.552643	0.863848
	130	B4DL02	SHC1	Y_285_SHC1		-1.20004	0.764089
	53	A0A024R4K4	SIGLEC6	Y_426_SIGLEC6		-0.68189	0.682586
	148	H7C1I0	SLC35E1	S_329_SLC35E1		-1.53294	1.16685
	5	B3KN57	SNX2	Y_203_SNX2		0.747486	0.881498
	88	Q7Z783	SPRY2	Y_55_SPRY2		-0.915122	0.801941
	99	Q05CK9	SYNCRIP	Y_409_SYNCRIP		-0.995573	1.19778
	145	P42680	TEC	Y_228_TEC		-1.41266	0.956222
	32	F2Z3N7	TMEM106B	Y_50_TMEM106B		-0.588913	0.823492
	8	C9J1X3	TNK2	Y_316_TNK2		0.649411	1.11131
	24	Q68CZ2	TNS3	Y_354_TNS3		-0.545957	0.612885
	9	Q14258	TRIM25	Y_278_TRIM25		0.642875	0.84178
	66	P68363	TUBA1A;TUBA1B;TUBA2;TUBA3C;TUBA3E;TUBA4A	Y_282_TUBA1A;Y_282_TUBA1B;Y_282_TUBA2;Y_282_TUBA3C;Y_282_TUBA3E;Y_282_TUBA4A		-0.733514	0.242853
	125	A0A087WU06	TUBGCP3	Y_131_TUBGCP3		-1.17129	0.676492
	86	X6RGC9	TYROBP	Y_100_TYROBP		-0.903976	0.831998
	4	F2Z3P2	UMPS	Y_37_UMPS		0.764324	1.12911
	23	A0A140VJZ1	USP5	Y_223_USP5		-0.543113	0.694057
	94	Q5TZX9	VTI1B	Y_68_VTI1B		-0.961959	1.06137
	96	Q9BRP8	WIBG	Y_45_WIBG		-0.979821	1.10633
	69	Q6PKI6	YBX1	Y_158_YBX1		-0.747199	0.551728

## Sheet: Table_S3_pYome_MOLM13
	#	Protein	Gene	Amino acid_Position_Gene names	Pathway	Mean log2 normalized H/L ratio	-log10 P-value
	1	F8WBT0	ARAP1;FLJ00357	Y_25_ARAP1;Y_25_FLJ00357	Other hits down	-2.6761	1.93186
	2	Q92835	INPP5D	Y_1161_INPP5D	Other hits down	-2.672	2.38529
	3	Q8TF42	UBASH3B	Y_19_UBASH3B	Other hits down	-2.58177	2.58177
	4	B4DHN0	MAPK1	T_173_MAPK1	RAS/MAPK/ERK signaling	-2.26379	2.19447
	5	O15357	INPPL1	Y_986_INPPL1	Other hits down	-2.22543	1.72261
	6	B7ZAG1	CBLB	Y_867_CBLB	Other hits down	-1.87847	1.59144
	7	A0A0U1RR39	CBL	Y_630_CBL	Other hits down	-1.77236	2.98854
	8	Q92835	INPP5D	Y_915_INPP5D	Other hits down	-1.76929	1.68126
	9	A8K7W1	DOK2	Y_299_DOK2	Other hits down	-1.76063	2.06602
	10	K7EK35	STAT5A;STAT5B	Y_663_STAT5A;Y_663_STAT5B	Other hits down	-1.71777	2.86832
	11	B4DNE5	PTPN18	Y_40_PTPN18	Other hits down	-1.70132	1.5014
	12	Q6ZUJ8	PIK3AP1	Y_570_PIK3AP1	Other hits down	-1.6639	1.56243
	13	B5BTZ6	STAT3	Y_704_STAT3	Other hits down	-1.54594	1.68967
	14	T1WFC1	GOPC	Y_393_GOPC	Other hits down	-1.49023	1.84736
	15	B4DNE5	PTPN18	Y_5_PTPN18	Other hits down	-1.47966	1.46315
	16	G8JLH9	STAT3	Y_607_STAT3	Other hits down	-1.47278	1.65564
	17	A0A0U1RR39	CBL	Y_656_CBL	Other hits down	-1.46054	1.85637
	18	A0A024R328	PRKCD	S_304_PRKCD	Other hits down	-1.43395	2.48307
	19	B3KR49	MAPK3	Y_90_MAPK3	RAS/MAPK/ERK signaling	-1.4097	1.37261
	20	A0A087X0K1	CAB39	Y_323_CAB39	Other hits down	-1.38087	2.60913
	21	A0A024QYX8	WAS	Y_212_WAS	Other hits down	-1.37033	2.14376
	22	A9UEZ6	BCR;BCR/ABL fusion	Y_177_BCR;Y_177_BCR/ABL fusion	Other hits down	-1.36849	2.3607
	23	P42680	tec;TEC	Y_519_tec;Y_519_TEC	Other hits down	-1.29149	2.80987
	24	Q59EH7	DNAJC7	Y_39_DNAJC7	Other hits down	-1.27546	2.35555
	25	O15357	INPPL1	Y_886_INPPL1	Other hits down	-1.27259	1.36896
	26	B4DHN0	MAPK1	Y_175_MAPK1	RAS/MAPK/ERK signaling	-1.25575	3.8284
	27	A8K3M3	PTPN1	Y_46_PTPN1	Other hits down	-1.22301	2.07637
	28	Q92835	INPP5D	Y_1022_INPP5D	Other hits down	-1.21384	2.94279
	29	A0A024R328	PRKCD	Y_313_PRKCD	Other hits down	-1.18973	1.91673
	30	A0A0C3SFZ9	FCHO1	Y_358_FCHO1	Other hits down	-1.15134	1.34981
	31	B4E2M8	FAF2	Y_79_FAF2	Other hits down	-1.14694	1.9819
	32	C9J1X3	TNK2	Y_892_TNK2	Other hits down	-1.09691	1.95109
	33	A0A0A1HAW1	RAB2;RAB2A	Y_3_RAB2;Y_3_RAB2A	Other hits down	-1.08993	1.74857
	34	Q9UQC2	GAB2	Y_614_GAB2	RAS/MAPK/ERK signaling	-0.973269	1.53888
	35	Q5HY57	EMD	Y_132_EMD	Other hits down	-0.893968	1.38303
	36	A8MZ84	LAIR1	T_262_LAIR1	Other hits down	-0.851135	1.79438
	37	B2R820	CD244	Y_337_CD244	Other hits down	-0.840293	2.03636
	38	Q6IAW3	CDK5	Y_15_CDK5	Other hits down	-0.793154	1.44028
	39	Q9UQC2	GAB2	Y_476_GAB2	RAS/MAPK/ERK signaling	-0.791752	1.48293
	40	F8WBT0	ARAP1	Y_263_ARAP1	Other hits down	-0.771849	1.35546
	41	P42680	TEC	Y_228_TEC	Other hits down	-0.750183	1.41308
	42	A8K4G3	HCK	Y_310_HCK	Other hits down	-0.742227	1.45181
	43	A8K7W1	DOK2	Y_139_DOK2	Other hits down	-0.696663	1.68031
	44	A0A024R4F1	ENO1	Y_189_ENO1	Other hits down	-0.658233	2.58715
	45	D3DPU2	CAP1	Y_31_CAP1	Other hits down	-0.653189	2.4985
	46	A0A0S2Z510	SPG20	Y_45_SPG20	Other hits down	-0.613822	2.46848
	47	A0A087WTT1	PABPC1;PABPC3	Y_339_PABPC1;Y_339_PABPC3	Other hits down	-0.587652	1.71788
	48	Q6IAV3	EIF1;SUI1	Y_30_EIF1;Y_30_SUI1	Other hits down	-0.577191	1.38325
	49	Q05CK9	SYNCRIP	Y_409_SYNCRIP	Other hits down	-0.543143	1.93909
	50	Q53TK4	ITSN2	Y_552_ITSN2	Other hits down	-0.52029	2.06768
	51	Q5JWB9	TMEM230	Y_29_TMEM230	Other hits down	-0.514347	1.28966
	52	A8MZ87	KLC2	Y_206_KLC2	Other hits down	-0.510275	1.70819
	53	B4DJ71	SLC20A2	Y_179_SLC20A2	Other hits up	0.670382	1.42317
	54	C9JWQ9	RFTN1	Y_20_RFTN1	Other hits up	0.994529	1.54052
	55	Q9UIB8	CD84	Y_279_CD84	Other hits up	1.03231	3.51641
	56	Q05DE9	FYB	Y_571_FYB	Other hits up	1.34702	1.6391
		C9J1X3	TNK2	Y_859_TNK2	Other hits down	-0.828646	1.28579
		Q53TK4	ITSN2	Y_552_ITSN2	Other hits down	-1.02931	1.28577
		B4DRD2	PTTG1IP	Y_111_PTTG1IP	Other hits down	-0.567921	1.2599
		A0A087WTT1	PABPC1;PABPC4	Y_29_PABPC1;Y_29_PABPC4	Other hits down	-0.686334	1.259
		Q9UQC2	GAB2	Y_293_GAB2	Other hits down	-0.56878	1.25683
		A0A024R1N1	MYH9	Y_11_MYH9	Other hits down	-0.753788	1.25668
		B1ANR0	PABPC4	Y_364_PABPC4	Other hits down	-0.78367	1.2514
		D3DNX8	PGRMC2	Y_17_PGRMC2	Other hits down	-0.929728	1.24688
		Q2TA81	DOK1	Y_235_DOK1	Other hits down	-0.767427	1.24076
		Q5TBB8	LAPTM5	Y_239_LAPTM5	Other hits down	-0.571823	1.22335
		Q6IC98	GRAMD4	Y_390_GRAMD4	Other hits down	-0.56654	1.2059
		Q05CK9	SYNCRIP	Y_409_SYNCRIP	Other hits down	-0.995573	1.19778
		Q5U0F4	EIF3I	Y_308_EIF3I	Other hits down	-0.654708	1.19378
		Q8WWW8	GAB3	Y_560_GAB3	Other hits down	-1.35004	1.19028
		Q9GZY6	LAT2	Y_136_LAT2	Other hits down	-0.971422	1.17204
		Q59HA5	GAK	Y_511_GAK	Other hits down	-1.00024	1.16821
		Q96IN2	GUK1	Y_38_GUK1	Other hits down	-0.560585	1.16767
		H7C1I0	SLC35E1	S_329_SLC35E1	Other hits down	-1.53294	1.16685
		B2R5V9	HDLBP	Y_437_HDLBP	Other hits down	-0.507845	1.16677
		P14317	HCLS1	Y_222_HCLS1	Other hits down	-1.01352	1.15857
		Q96CS3	FAF2	Y_79_FAF2	Other hits down	-0.756551	1.15644
		H7C4Z0	DUSP7	Y_102_DUSP7	Other hits down	-1.17963	1.15469
		Q06124	PTPN11	Y_584_PTPN11	Other hits down	-1.23249	1.15153
		B7Z6W7	c-fgr;FGR	Y_53_c-fgr;Y_53_FGR	Other hits down	-1.15154	1.14616
		P46109	CRKL	Y_105_CRKL	Other hits down	-2.21561	1.14494
		Q92835	INPP5D	Y_915_INPP5D	Other hits down	-1.3953	1.13677
		B4DNC8	RPL13a;RPL13A	Y_71_RPL13a;Y_71_RPL13A	Other hits up	0.583587	1.13632
		Q92835	INPP5D	S_1024_INPP5D	Other hits down	-1.12953	1.13606
		F8W6I7	HNRNPA1;HNRPA1	Y_282_HNRNPA1;Y_282_HNRPA1	Other hits down	-0.626348	1.13517
		F2Z3P2	UMPS	Y_37_UMPS	Other hits up	0.764324	1.12911
		B4DDM8	ADAM9	T_146_ADAM9	Other hits down	-0.579664	1.12673
		B4DDM8	ADAM9	Y_154_ADAM9	Other hits down	-0.579664	1.12673
		Q8N381	PIK3R3	Y_373_PIK3R3	Other hits down	-1.18118	1.12635
		Q9UQC2	GAB2	S_623_GAB2	Other hits up	0.594109	1.12293
		C9J1X3	TNK2	Y_316_TNK2	Other hits up	0.649411	1.11131
		Q6T4P5	LPPR3	Y_707_LPPR3	Other hits down	-0.734127	1.11111
		B4DL02	SHC1	Y_364_SHC1	Other hits down	-1.63143	1.10976
		Q9BRP8	WIBG	Y_45_WIBG	Other hits down	-0.979821	1.10633
		A0A0S2Z4T5	RIN1	Y_36_RIN1	Other hits down	-0.925257	1.09642
		Q53GK6	ACTB;ACTG1;HEL-176;PS1TP5BP1	Y_198_ACTB;Y_198_ACTG1;Y_198_HEL-176;Y_198_PS1TP5BP1	Other hits down	-0.56	1.07996
		Q5HY57	EMD	Y_126_EMD	Other hits down	-0.958889	1.07794
		A0A024RDU9	GTF2F2	Y_196_GTF2F2	Other hits down	-1.08782	1.07713
		F8W0B3	HVCN1	Y_35_HVCN1	Other hits down	-1.14965	1.07432
		B4DMJ6	RPL4	Y_272_RPL4	Other hits down	-2.03558	1.07146
		Q5TZX9	VTI1B	Y_68_VTI1B	Other hits down	-0.961959	1.06137
		P36888	FLT3	Y_768_FLT3	Other hits down	-0.752145	1.05378
		P36954	POLR2I	Y_111_POLR2I	Other hits down	-1.01706	1.04718
		Q66K21	LRP10	Y_22_LRP10	Other hits down	-0.527676	1.03824
		Q9GZY6	LAT2	Y_193_LAT2	Other hits down	-0.553049	1.032
		Q6R327	RICTOR	Y_863_RICTOR	Other hits down	-0.6641	1.03156
		E7EU13	ARAP1;FLJ00357	Y_492_ARAP1;Y_492_FLJ00357	Other hits down	-2.24882	1.02447
		H0Y9B7	LEMD2	Y_19_LEMD2	Other hits down	-0.717822	1.02439
		D6RAM3	DOK3	Y_342_DOK3	Other hits down	-1.36729	1.01488
		A8MZ84	LAIR1	Y_233_LAIR1	Other hits down	-0.736907	1.01333
		A0A087WZ13	RAVER1	Y_509_RAVER1	Other hits down	-0.787618	1.00974
		A8MZ84	LAIR1	Y_263_LAIR1	Other hits down	-0.779672	1.00399
		Q5HYI5	RAB2B	Y_3_RAB2B	Other hits down	-0.525819	0.998588
		J3QKQ4	CD300A	Y_137_CD300A	Other hits down	-0.658501	0.992715
		I3L0J8	MAPK7	Y_82_MAPK7	Other hits down	-0.975446	0.980897
		K9JA46	EL52;HSP90AA1;HSP90AA2P;HSP90AB1;HSP90AB2P	Y_284_EL52;Y_284_HSP90AA1;Y_284_HSP90AA2P;Y_284_HSP90AB1;Y_284_HSP90AB2P	Other hits down	-1.22917	0.958426
		Q13526	PIN1	Y_23_PIN1	Other hits down	-2.3351	0.957084
		P42680	TEC	Y_228_TEC	Other hits down	-1.41266	0.956222
		A8K7G0	CLEC10A	Y_10_CLEC10A	Other hits down	-0.876915	0.952961
		Q10567	AP1B1	Y_277_AP1B1	Other hits down	-1.00976	0.95291
		Q10567	AP1B1	Y_277_AP1B1	Other hits down	-1.33132	0.933117
		D6RF93	NFKB1	Y_34_NFKB1	Other hits up	0.709361	0.932233
		B3KNF6	SEC61A1	Y_276_SEC61A1	Other hits down	-1.2148	0.925359
		S6FRS6	SAMSN1;SASH1	Y_110_SAMSN1;Y_110_SASH1	Other hits down	-0.620344	0.909097
		A8K6V7	G3BP2	Y_56_G3BP2	Other hits down	-0.590264	0.895293
		B3KR49	MAPK3	T_88_MAPK3	Other hits down	-1.5024	0.888516
		Q9UQC2	GAB2	Y_324_GAB2	Other hits down	-1.27102	0.882176
		B3KN57	SNX2	Y_203_SNX2	Other hits up	0.747486	0.881498
		Q92835	INPP5D	Y_611_INPP5D	Other hits down	-1.01397	0.874759
		Q9UQC2	GAB2	Y_643_GAB2	Other hits down	-0.977334	0.864838
		Q8NC51	SERBP1	Y_207_SERBP1	Other hits down	-0.552643	0.863848
		F8W6I7	HNRNPA1;HNRPA1	Y_282_HNRNPA1;Y_282_HNRPA1	Other hits down	-0.857129	0.862687
		Q6IBJ7	RER1	Y_172_RER1	Other hits down	-0.880492	0.852616
		A0A0S2Z377	ANXA6	Y_603_ANXA6	Other hits up	0.549691	0.847428
		Q9GZY6	LAT2	Y_58_LAT2	Other hits down	-0.524335	0.845801
		Q14258	TRIM25	Y_278_TRIM25	Other hits up	0.642875	0.84178
		Q9UEL4	MPZL1	Y_237_MPZL1	Other hits down	-0.758633	0.837299
		Q9GZY6	LAT2	Y_193_LAT2	Other hits down	-0.801107	0.832935
		X6RGC9	TYROBP	Y_100_TYROBP	Other hits down	-0.903976	0.831998
		P14317	HCLS1	Y_175_HCLS1	Other hits down	-0.512589	0.831439
		F2Z3N7	TMEM106B	Y_50_TMEM106B	Other hits down	-0.588913	0.823492
		B4DHK3	MSTO1	Y_109_MSTO1	Other hits down	-1.88284	0.823483
		B2RBY7	SASH3	Y_189_SASH3	Other hits down	-0.607223	0.812908
		Q7Z783	SPRY2	Y_55_SPRY2	Other hits down	-0.915122	0.801941
		B3KX11	CCT3	Y_336_CCT3	Other hits down	-0.541555	0.80107
		D6RDK6	OCIAD1	Y_145_OCIAD1	Other hits down	-0.534255	0.78416
		B0YJC4	HEL113;VIM	Y_38_HEL113;Y_38_VIM	Other hits down	-0.796403	0.777273
		P36888	FLT3	Y_969_FLT3	Other hits down	-0.593455	0.772009
		V9HWB8	HEL-S-30;PKM;PKM2	Y_148_HEL-S-30;Y_148_PKM;Y_148_PKM2	Other hits up	0.653787	0.770388
		B4DL02	SHC1	Y_285_SHC1	Other hits down	-1.20004	0.764089
		A0A024R1N1	MYH9	Y_9_MYH9	Other hits down	-1.35843	0.755408
		Q6IBS0	TWF2	Y_309_TWF2	Other hits down	-0.660118	0.747168
		Q6IPT9	EEF1A1;EEF1A1L14;EEF1A1P5;PTI-1	Y_86_EEF1A1;Y_86_EEF1A1L14;Y_86_EEF1A1P5;Y_86_PTI-1	Other hits down	-0.56341	0.731557
		A0A024RAS5	ARHGDIB	Y_24_ARHGDIB	Other hits down	-1.12446	0.728081
		A0A140VJZ1	USP5	Y_223_USP5	Other hits down	-0.543113	0.694057
		A0A0U1RR39	CBL;CBLB	Y_371_CBL;Y_371_CBLB	Other hits down	-1.33502	0.690822
		A0A024R4K4	SIGLEC6	Y_426_SIGLEC6	Other hits down	-0.68189	0.682586
		A0A087WU06	TUBGCP3	Y_131_TUBGCP3	Other hits down	-1.17129	0.676492
		P22626	HNRNPA2B1;HNRPA2B1	Y_347_HNRNPA2B1;Y_347_HNRPA2B1	Other hits down	-1.38803	0.672622
		P14317	HCLS1	Y_222_HCLS1	Other hits down	-0.96715	0.666172
		P16152	CBR1	Y_253_CBR1	Other hits down	-0.579049	0.635935
		Q6IQ43	PTPN9	Y_555_PTPN9	Other hits down	-0.791764	0.62603
		P36888	FLT3	S_976_FLT3	Other hits down	-0.542927	0.625416
		Q68CZ2	TNS3	Y_354_TNS3	Other hits down	-0.545957	0.612885
		A0A024RD80	HSP90AB1	Y_596_HSP90AB1	Other hits down	-0.536756	0.609738
		Q15056	EIF4H;WBSCR1	Y_12_EIF4H;Y_12_WBSCR1	Other hits down	-0.562425	0.599347
		B4DLQ3	OFD1	Y_584_OFD1	Other hits down	-1.06302	0.594008
		B1AK87	CAPZB	Y_220_CAPZB	Other hits down	-0.969336	0.58276
		Q53HW2	RPLP0;RPLP0P6	Y_24_RPLP0;Y_24_RPLP0P6	Other hits up	0.645142	0.571226
		A0A024QZ77	EFHD2	Y_83_EFHD2	Other hits down	-0.658048	0.561042
		Q6PKI6	YBX1	Y_158_YBX1	Other hits down	-0.747199	0.551728
		Q9UEL4	MPZL1	Y_215_MPZL1	Other hits down	-0.745641	0.535882
		A6NNN6	PCM1	Y_966_PCM1	Other hits down	-0.66694	0.53579
		A0A024RD80	HSP90AB1	Y_596_HSP90AB1	Other hits down	-0.528099	0.527235
		Q06124	PTPN11	Y_279_PTPN11	Other hits down	-0.537627	0.512744
		H3BV99	SNAP23	Y_96_SNAP23	Other hits down	-0.512249	0.511325
		X6RGC9	TYROBP	Y_100_TYROBP	Other hits down	-0.501354	0.500064
		B4DU91	EPN1	Y_72_EPN1	Other hits down	-1.04369	0.49491
		Q9NRY4	ARHGAP35	Y_1087_ARHGAP35	Other hits up	0.532774	0.437214
		B7Z3G9	RASA3	Y_66_RASA3	Other hits down	-0.58962	0.432426
		P68363	TUBA1A;TUBA1B;TUBA2;TUBA3C;TUBA3E;TUBA4A	Y_282_TUBA1A;Y_282_TUBA1B;Y_282_TUBA2;Y_282_TUBA3C;Y_282_TUBA3E;Y_282_TUBA4A	Other hits down	-0.733514	0.242853

## Sheet: Table_S4_ORF_MV411
	#	Barcode ID	Construct ID	# clones genome-wide	# clones hits	Gene	Pathway	Hit specificity	z-score average log2(FC) DMSO vs. ETP	z-score average log2(FC) Entospletinib vs. ETP	z-score replicate 1 log2(FC) Entospletinib vs. ETP	z-score replicate 2 log2(FC) Entospletinib vs. ETP
	1	TGCTGCGAAAATAACGCGGCGGCC	TRCN0000489702	2	1	HRAS	RAS/MAPK/ERK signaling	Core hit	-1.81925	7.31424	6.36729	7.25783
	2	ATACAAGAACGATCGTGATATACA	TRCN0000471212	1	1	CSF2	Chemokine/Chemokine receptors	Core hit	1.77898	7.24833	6.58501	6.91766
	3	GGACTAGACAGGTCGTTTGTCTGT	TRCN0000467867	1	1	IL3	Chemokine/Chemokine receptors	Core hit	1.98068	6.56318	5.90627	6.31998
	4	ATGCATGCCCGCAGCTGAAATGTC	TRCN0000481389	3	3	PIM1	Other hits	Core hit	1.4668	4.99863	4.50198	4.80975
	5	AGGTGTGTGAATAGTTAAGTATGA	TRCN0000489909	3	3	PIM1	Other hits	Core hit	0.876387	4.9792	4.45735	4.81815
	6	GGGGTGACAAGATATGCTGACTAA	TRCN0000466006	3	3	PIM1	Other hits	Core hit	1.09966	4.60346	4.158	4.4176
	7	GGGTGGACCTAAGTTATAACGAGC	TRCN0000488281	3	3	PIM3	Other hits	Core hit	0.307421	4.57222	4.147	4.37042
	8	TAATACGATTACTCACTCCCTCCT	TRCN0000479529	1	1	UGCG	Other hits	MV4-11 specific	-0.434674	4.18967	3.5199	4.28455
	9	GGTCGAAGTCGGAGCTCAATACCG	TRCN0000488765	1	1	ROS1	Other hits	Core hit	0.199399	4.14661	3.64461	4.07983
	10	TACTTTTGGCGGTGATTAGGTCTG	TRCN0000470181	1	1	CCND3	Other hits	Core hit	1.33054	4.04823	3.17277	4.36794
	11	TTTTTTTGCAAGTTTAAGCGACCT	TRCN0000488146	3	3	PIM3	Other hits	Core hit	0.365929	3.86264	3.48648	3.70907
	12	TAAGGGCGGATTCTAATGGACAGA	TRCN0000489631	3	3	PIM2	Other hits	Core hit	1.6196	3.83814	3.5115	3.63846
	13	TGACCCGCTTATTCTAAAAAATCG	TRCN0000489434	2	1	CXCR2	Chemokine/Chemokine receptors	Core hit	0.395908	3.73833	3.16429	3.79944
	14	TTTGATCTATAGGTAATTAATTAT	TRCN0000487903	12	4	EGFR	Growth factor receptors	Core hit	-0.203669	3.7115	0.454539	6.45599
	15	TCAAGTATCAGACCACTAAACATC	TRCN0000489889	12	4	EGFR	Growth factor receptors	Core hit	-0.778266	3.55652	2.91533	3.70961
	16	GGAGAAATTATCCTCAACCATTAC	TRCN0000487677	5	1	AKT3	MTOR/AKT signaling	MV4-11 specific	1.81694	3.46492	2.98868	3.46581
	17	CTAAAGCGCTCCCAATAACCGAGA	TRCN0000480552	2	1	MRPL10	Other hits	MV4-11 specific	0.866631	3.4259	3.55572	2.82681
	18	GAAAAAACTCCATAACCTACTATG	TRCN0000488410	3	1	HCK	Other hits	MV4-11 specific	-0.849278	3.24583	2.98489	3.0617
	19	CCGCACTGGTTTAATACCTCTCGT	TRCN0000488960	2	1	GAB2	Other hits	MV4-11 specific	0.480865	3.22115	2.60685	3.39334
	20	TGTTATCCATAAATTTTCACTACC	TRCN0000474193	1	1	CRKL	RAS/MAPK/ERK signaling	Core hit	1.18371	3.02251	2.5809	3.04943
	21	ACTCTCGGCGATATCCCCTGCCTC	TRCN0000474532	1	1	IKZF2	Other hits	MV4-11 specific	1.27017	2.93264	3.34871	2.11523
	22	TGTCTTAGGACACTCAGCCTTGAC	TRCN0000488265	2	1	GPR17	Other hits	Core hit	0.309287	2.86118	2.4581	2.87174
	23	CTAATACAGTTAGACAACTACTTC	TRCN0000474390	1	1	SSBP2	Other hits	MV4-11 specific	0.928422	2.85321	2.52601	2.78906
	24	GAATTTGTTGTAATTGCGTTAAAC	TRCN0000489549	4	1	PDGFRB	Other hits	Core hit	0.789919	2.84709	2.63922	2.66458
	25	ACAGGCACTACGGCCCTACTAGAA	TRCN0000492091	2	1	CNR2	Other hits	Core hit	1.39459	2.80346	3.0988	2.12432
	26	CACTCATGTCGTGGCCCAAAAAAT	TRCN0000491764	12	4	EGFR	Growth factor receptors	Core hit	-0.614369	2.79218	4.49367	0.710132
	27	TGTCATACTTCCAAGAGTACCAAC	TRCN0000469357	1	1	CRK	RAS/MAPK/ERK signaling	MV4-11 specific	0.878752	2.76848	2.45809	2.69915
	28	TGCGCCCAGTGAATATCTAAAAAA	TRCN0000489690	3	1	PRPS1	Other hits	MV4-11 specific	0.314456	2.76205	2.59915	2.54628
	29	ACAAATCCTGTCCACCAGAGGGCA	TRCN0000488585	3	3	PIM2	Other hits	Core hit	1.35655	2.75184	2.5392	2.58716
	30	TTATGAGACCAAGCTCAAACTTGG	TRCN0000488236	5	4	S1PR5	Other hits	MV4-11 specific	-0.0679524	2.74924	2.03441	3.0865
	31	TGGTCAAAAAGAAACAAGATTCCT	TRCN0000475569	3	3	PIM3	Other hits	Core hit	0.0235406	2.74714	2.38144	2.73597
	32	TGCCGATGATATCCATACTTCAGC	TRCN0000489611	2	1	HTR1F	Other hits	Core hit	2.39935	2.7006	2.27868	2.75198
	33	CTATAAAAACTCAAGTCCGGTCCC	TRCN0000488343	4	1	KRAS	RAS/MAPK/ERK signaling	Core hit	0.731445	2.68957	2.83657	2.17421
	34	CAACATGCGAATCCATTTGACAGT	TRCN0000473119	1	1	TSC1	Other hits	MV4-11 specific	-1.27238	2.63976	1.39642	3.51989
	35	GCGAGAAGCACATGGGGCTGTTCG	TRCN0000476642	1	1	CSF3	Chemokine/Chemokine receptors	Core hit	0.435874	2.63613	2.48502	2.42584
	36	AATCGATGTGCACTTGCGCAGCAT	TRCN0000487825	3	1	C5AR2	Other hits	MV4-11 specific	0.469497	2.61555	2.1525	2.71964
	37	GCCGTAAGTGCTAGAGCCTGCATC	TRCN0000489892	3	1	FFAR2	Other hits	Core hit	1.17125	2.5368	2.49167	2.23427
	38	TCCTGCAAAAAGTCTCTTCCTGTA	TRCN0000467249	2	2	S1PR1	Other hits	Core hit	0.512466	2.52592	2.16607	2.53922
	39	TCTTCTAGGCAGACCGGGCCGCCA	TRCN0000476756	1	1	NIPAL1	Other hits	MV4-11 specific	1.12055	2.52326	2.46722	2.23348
	40	TTCTGAACCGGGTGGCCACGTGCT	TRCN0000487798	2	2	S1PR1	Other hits	Core hit	0.654012	2.51158	2.30927	2.36949
	41	GCTTGGTTATGTACAGAGGACTTG	TRCN0000471924	3	2	HTR1B	Other hits	Core hit	1.52708	2.45239	2.18523	2.38319
	42	AACTTAACGGTGGATGGACTATTT	TRCN0000488582	2	2	MTNR1A	Other hits	MV4-11 specific	0.954554	2.42351	2.26256	2.25219
	43	GCGATCTATGAGTGTCTGACCAGA	TRCN0000491814	4	1	AKT1	MTOR/AKT signaling	MV4-11 specific	1.06389	2.42206	1.9106	2.60103
	44	CTACGAAATGCTTCACGGTCCCTA	TRCN0000469344	4	1	LYN	Other hits	MV4-11 specific	-0.483329	2.39915	2.87876	1.59137
	45	ACAGGAATGCGGATATTACGGAGT	TRCN0000488942	5	1	PDIK1L	Other hits	MV4-11 specific	-0.137629	2.37735	1.84854	2.57977
	46	AGACCGCATTTGGTGACAGGGCCA	TRCN0000489486	4	1	PDGFRA	Growth factor receptors	Core hit	0.308969	2.36863	1.93798	2.4742
	47	TTCCGTGTTATCTCATCCTCCAAT	TRCN0000476834	1	1	ZNF705D	Other hits	MV4-11 specific	1.90706	2.35922	1.86483	2.52975
	48	TACATTGGTATCCTAGTAACCCAG	TRCN0000491390	12	4	EGFR	Growth factor receptors	Core hit	-0.558635	2.34245	2.53122	1.83293
	49	GACCATTGCGCACCTGAGCCTTTC	TRCN0000491738	5	2	GPR87	Other hits	Core hit	1.52017	2.33495	2.13925	2.21047
	50	CTGTGCTACCCGAGAGACTACCCT	TRCN0000473820	2	1	TTI2	Other hits	MV4-11 specific	-1.20802	2.32892	2.97165	1.36783
	51	GCAGGGAGACCATAACATGCCAGA	TRCN0000469300	2	1	IL13	Chemokine/Chemokine receptors	MV4-11 specific	0.445278	2.30873	2.02084	2.27992
	52	TCGGCATGTGTTTAAGATGTTTTA	TRCN0000476745	1	1	SLC34A2	Other hits	MV4-11 specific	0.308428	2.26784	1.92752	2.297
	53	GATACGTCATTCGAAATCCTGCAG	TRCN0000491697	1	1	LIN28B	Other hits	MV4-11 specific	1.99919	2.26131	1.85549	2.35678
	54	TGAATCCAGCTTCCGACTTTTTGT	TRCN0000469362	1	1	MED31	Other hits	MV4-11 specific	0.529689	2.26127	2.20701	2.00561
	55	TCGCAGGTTTGCCACGAATGCCTC	TRCN0000475926	2	1	HTR1E	Other hits	Core hit	0.811491	2.25954	1.80474	2.40419
	56	ATGTGACGCCGCCTTGTGGCTATC	TRCN0000489451	3	2	HTR1B	Other hits	Core hit	0.761284	2.25536	2.0696	2.13186
	57	GCAGACTTCAATCGCAACCAGCGC	TRCN0000468679	1	1	BOLL	Other hits	MV4-11 specific	0.221626	2.16544	2.03342	2.00059
	58	CTTTGGTCGGCTCTAATGATCAGA	TRCN0000466018	2	1	CNST	Other hits	MV4-11 specific	0.105816	2.16227	3.68197	0.348102
	59	TCTCTTAAGACTTCGACGTGGACC	TRCN0000469372	1	1	FAM168A	Other hits	MV4-11 specific	1.05592	2.1567	2.01023	2.00748
	60	AACGAGTGAAACACGACAACGGTC	TRCN0000478517	5	2	GPR87	Other hits	Core hit	1.46589	2.09855	1.62048	2.28849
	61	GTGTCAGGAGCTAAACGCTCTGGG	TRCN0000471278	1	1	ARV1	Other hits	MV4-11 specific	1.29944	2.08525	2.32687	1.55818
	62	TATGTCATCCAAGTGGGACCAATC	TRCN0000488100	5	1	LCK	Other hits	MV4-11 specific	0.0163946	2.07398	1.55051	2.31263
	63	TGAAAGCCTACAGGAAACACAAGC	TRCN0000475034	1	1	MAIP1	Other hits	MV4-11 specific	0.588753	2.0731	2.36423	1.49825
	64	CACAAAATAAAAGTTATACAGGGG	TRCN0000487925	3	1	CX3CR1	Chemokine/Chemokine receptors	MV4-11 specific	0.377892	2.0637	1.44264	2.40125
	65	ACTGCGGCTGATCAGATCCCCAGG	TRCN0000465719	2	1	MEIS2	Other hits	MV4-11 specific	3.54952	2.06304	1.98132	1.86197
	66	ATGCAGAACATGCAAACTCACTCT	TRCN0000492174	3	1	FRK	Other hits	MV4-11 specific	0.339951	2.05691	1.96563	1.86622
	67	AATGGCAGCTTGACTTCAATGCAC	TRCN0000492315	2	2	MTNR1A	Other hits	MV4-11 specific	1.077	2.03773	1.72694	2.06893
	68	CGGAGGCGAAACACCTCCCACAAT	TRCN0000471380	1	1	SETMAR	Other hits	MV4-11 specific	0.661263	2.03716	2.93368	0.862562
	69	CTTAATCTACTAATTCACAGAGCC	TRCN0000466710	5	4	S1PR5	Other hits	MV4-11 specific	0.0953804	2.02698	2.30834	1.46821
	70	GTTCTCAGTGGCCTAAGTTCCATT	TRCN0000487935	5	4	S1PR5	Other hits	MV4-11 specific	-0.498167	2.02621	1.53292	2.24127
	71	TGGAAGCCTTTGGACATCCAACAC	TRCN0000487679	3	1	MRGPRD	Other hits	MV4-11 specific	-0.0546557	2.02268	1.70217	2.06565
	72	CTCCTGCAGCTCCAAGCGAGCACA	TRCN0000487761	5	4	S1PR5	Other hits	MV4-11 specific	-0.892051	2.02128	1.26765	2.49704
	73	GCAGCCAAAGCAAGGATGCCCGGA	TRCN0000465407	1	1	HEY2	Other hits	MV4-11 specific	3.94719	2.01722	1.63664	2.12094
	74	ACTGACCTTACAAATCACTCATCC	TRCN0000469954	2	1	GPR22	Other hits	MV4-11 specific	1.70437	2.01558	1.44794	2.30636
	75	AGCCTCGGGTTCATGACGCACCTT	TRCN0000489215	2	1	GALR1	Other hits	Core hit	0.353315	2.01201	2.11312	1.63533
	76	CTCCGAAGCTAATTCATGGTAGCA	TRCN0000489649	3	1	AXL	RAS/MAPK/ERK signaling	MV4-11 specific	-0.730132	2.0105	1.6392	2.10587
	77	TCCAAACTTGTCGCGCACACCGTT	TRCN0000476541	1	1	TRIM49C	Other hits	MV4-11 specific	1.76208	2.00459	2.15472	1.57996
	78	CCTTCCGAAAAAACTTTATCATTG	TRCN0000472790	3	3	PIM2	Other hits	Core hit	1.00647	2.00146	1.85536	1.87314

## Sheet: Table_S5_ORF_MOLM14
	#	Barcode ID	Construct ID	# clones genome-wide	# clones hits	Gene	Pathway	Hit specificity	z-score average log2(FC) DMSO vs. ETP	z-score average log2(FC) Entospletinib vs. ETP	z-score replicate 1 log2(FC) Entospletinib vs. ETP	z-score replicate 2 log2(FC) Entospletinib vs. ETP
	1	GATATTCAGGGTCAGGTTACTTTC	TRCN0000488060	3	2	CSF1R	Chemokine/Chemokine receptors	MOLM14 specific	5.57155	10.2828	9.83349	8.51801
	2	GAATTTGTTGTAATTGCGTTAAAC	TRCN0000489549	4	4	PDGFRB	Growth factor receptors	Core hit	5.66936	8.77834	7.20825	8.56391
	3	TCAAGTATCAGACCACTAAACATC	TRCN0000489889	12	4	EGFR	Growth factor receptors	Core hit	4.35992	7.24402	7.4355	5.44756
	4	TACTGCGCTTTGTGACAAACGGTT	TRCN0000467007	3	2	CSF1R	Chemokine/Chemokine receptors	MOLM14 specific	3.39901	7.06364	6.17717	6.48062
	5	TTTGATCTATAGGTAATTAATTAT	TRCN0000487903	12	4	EGFR	Growth factor receptors	Core hit	3.43834	6.65474	4.80054	7.21521
	6	GGTCGAAGTCGGAGCTCAATACCG	TRCN0000488765	1	1	ROS1	Other hits	Core hit	3.6531	6.57699	5.92215	5.84839
	7	TACTTTTGGCGGTGATTAGGTCTG	TRCN0000470181	1	1	CCND3	Other hits	Core hit	3.78542	6.26378	5.64301	5.56674
	8	GGTGTGTATCCTCGACAATTCGGG	TRCN0000475150	1	1	CREB1	Other hits	MOLM14 specific	2.79862	6.20444	5.92999	5.14326
	9	AGACCGCATTTGGTGACAGGGCCA	TRCN0000489486	4	1	PDGFRA	Growth factor receptors	Core hit	3.76128	6.02988	4.99589	5.83412
	10	CTATAAAAACTCAAGTCCGGTCCC	TRCN0000488343	4	1	KRAS	RAS/MAPK/ERK signaling	Core hit	1.60162	5.46514	5.15807	4.60154
	11	ACCGCAATCCCCTTCATCACTCAA	TRCN0000481565	1	1	SPATA25	Other hits	MOLM14 specific	2.48695	5.20803	4.62676	4.6994
	12	TATGGAGTGCCGTTTTGGCGTTTA	TRCN0000468165	1	1	NFE2L1	Other hits	MOLM14 specific	2.51748	5.14547	3.97053	5.29707
	13	ATAGAGCGGTCCGTCAAAACTAGA	TRCN0000488186	8	4	FLT3	Other hits	MOLM14 specific	2.07112	5.04259	2.12892	7.11023
	14	TTCCGACATTAAGCCGCAACCGAG	TRCN0000489587	12	4	EGFR	Growth factor receptors	Core hit	1.29787	5.01429	5.70563	3.16225
	15	TTGAAAACTTTCTATAACAAAATA	TRCN0000470113	1	1	BATF	Other hits	MOLM14 specific	2.57776	4.97873	3.81985	5.14938
	16	TCCCTCGACAATAACCTACTCAAA	TRCN0000465540	1	1	CXXC4	Chemokine/Chemokine receptors	MOLM14 specific	1.34649	4.65625	3.92159	4.43562
	17	CTATGCTTCTACGCGATTGGTTGC	TRCN0000473083	3	1	EEF1D	Other hits	MOLM14 specific	1.88387	4.31131	4.57229	3.08203
	18	TGGAATTAGCTCCACCGTGTACTT	TRCN0000466736	1	1	Lztr1	Other hits	MOLM14 specific	1.82457	4.20472	3.8786	3.63816
	19	TGAGTTGAACGGACTAACATGAAT	TRCN0000478183	1	1	KLF10	Other hits	MOLM14 specific	1.67281	4.19127	3.59015	3.92714
	20	TTTGAATCTACGGTTTCAAGCTCA	TRCN0000487712	8	4	FLT3	Other hits	MOLM14 specific	0.551893	4.06543	2.20764	5.19739
	21	TAAGGGCGGATTCTAATGGACAGA	TRCN0000489631	3	3	PIM2	Other hits	Core hit	2.0209	4.06046	3.94525	3.29584
	22	TCCTTGCACTAACCTTCTTCTCTA	TRCN0000488279	8	4	FLT3	Other hits	MOLM14 specific	0.469127	3.99856	4.02708	3.09099
	23	TCCTGCAAAAAGTCTCTTCCTGTA	TRCN0000467249	2	2	S1PR1	Other hits	Core hit	1.41993	3.88334	3.53464	3.41183
	24	TTACGAATTCGGGCTGACCTAGGA	TRCN0000492071	3	1	FPR2	Other hits	MOLM14 specific	1.85455	3.87601	4.4235	2.43015
	25	TTCGATCGGTTAGCAATCATGTTA	TRCN0000488896	3	1	LTB4R	Other hits	MOLM14 specific	1.81494	3.86916	3.41802	3.51231
	26	TCTGCCAAATAGAGTTCGCCGGCA	TRCN0000474696	1	1	BATF3	Other hits	MOLM14 specific	2.67786	3.78812	3.07477	3.73458
	27	GCTCCCTGGATGATAATTGTCTTA	TRCN0000489149	3	3	S1PR4	Other hits	MOLM14 specific	1.85901	3.77629	2.71298	4.10647
	28	ACAAATCCTGTCCACCAGAGGGCA	TRCN0000488585	3	3	PIM2	Other hits	Core hit	1.98904	3.73765	3.56832	3.10273
	29	CGCGTTCTGTTACATAAATGCCCC	TRCN0000472631	1	1	PTPRA	Other hits	MOLM14 specific	1.29097	3.70477	3.21486	3.42619
	30	GAAATTTGACATTTGATATATTTA	TRCN0000488834	6	2	PTGER3	Other hits	MOLM14 specific	1.62002	3.69509	2.83924	3.81713
	31	AGCCTCGGGTTCATGACGCACCTT	TRCN0000489215	2	2	GALR1	Other hits	Core hit	2.06086	3.64582	3.32702	3.1938
	32	TGTGAAGGTACTCGGCAACAGACC	TRCN0000467871	1	1	MBNL1	Other hits	MOLM14 specific	0.87792	3.63928	3.46358	3.03286
	33	TCGTGCCCACAAAACATGTAAAGT	TRCN0000472051	1	1	HMGB2	Other hits	MOLM14 specific	2.50989	3.60445	2.41993	4.10429
	34	TTTCCTGTACTCAGTCAATTTGTA	TRCN0000470680	12	4	EGFR	Growth factor receptors	Core hit	0.502554	3.57284	3.27601	3.1129
	35	TCGACATCCTTTCTGCGCACGCAC	TRCN0000471109	1	1	Ints11	Other hits	MOLM14 specific	1.2845	3.56214	4.83011	1.40047
	36	CACTGCGGGCAAATCGAAGGCAAA	TRCN0000474946	3	2	RAF1	RAS/MAPK/ERK signaling	MOLM14 specific	0.989842	3.51348	3.05751	3.23985
	37	CATTATCATCCTACTGCATAGTTC	TRCN0000489708	2	2	HCAR1	Other hits	MOLM14 specific	2.24552	3.51306	3.24364	3.03637
	38	ATCGATACCGAATTCTCCGGACTG	TRCN0000466733	1	1	CGGBP1	Other hits	MOLM14 specific	1.29556	3.51247	3.53103	2.7223
	39	CCCGCTTTCTAAAACTGGTAATCC	TRCN0000489221	8	4	FLT3	Other hits	MOLM14 specific	1.76454	3.48672	2.78761	3.48375
	40	ACACTGGCCTTCTGGATCCCGGGC	TRCN0000467789	1	1	BOLA1	Other hits	MOLM14 specific	1.45718	3.4742	5.11957	0.920818
	41	CCACCAGTCCTGTGGGGGACTACA	TRCN0000488505	2	1	P2RY14	Other hits	MOLM14 specific	2.01814	3.44791	3.4493	2.69059
	42	ACACTCGCATTCTAACTTGCCGCG	TRCN0000491953	3	1	NPY2R	Other hits	MOLM14 specific	1.99372	3.41941	2.86062	3.27837
	43	GCGTTTCTGTTTATCTGACGGTTT	TRCN0000473078	1	1	SLC38A1	Other hits	MOLM14 specific	1.03469	3.40005	2.62301	3.50093
	44	CCAATCAAACTGCCATCTCCTAGC	TRCN0000489826	3	2	GPR34	Other hits	MOLM14 specific	2.15473	3.31171	2.37652	3.60419
	45	CGTATGGTGGTGTCTAAAAGTCGA	TRCN0000488254	4	2	DYRK3	Other hits	MOLM14 specific	1.82095	3.30994	2.82919	3.10792
	46	CCTTCCGAAAAAACTTTATCATTG	TRCN0000472790	3	3	PIM2	Other hits	Core hit	1.91561	3.30905	3.08512	2.82754
	47	TGTCTTAGGACACTCAGCCTTGAC	TRCN0000488265	2	1	GPR17	Other hits	Core hit	1.82696	3.30825	2.90437	3.02288
	48	CTCGTCCTAAACGAACAAAACCCT	TRCN0000467885	1	1	ADAMTS15	Other hits	MOLM14 specific	1.62058	3.25935	0.305443	5.76171
	49	CTTTACCTAAGATGTTAGGCTCAT	TRCN0000489870	4	2	DYRK3	Other hits	MOLM14 specific	0.987942	3.24761	3.29843	2.48038
	50	GACGGTGGAGGGATTATCAGACCA	TRCN0000469110	4	4	PDGFRB	Growth factor receptors	Core hit	-0.243048	3.22713	2.983	2.78559
	51	CCGTATGGCCACTCCGAGATAATT	TRCN0000475378	2	1	ATAD3B	Other hits	MOLM14 specific	1.32535	3.20204	3.84812	1.79655
	52	TTGATGTTAGATGCAATGCCCCAC	TRCN0000468138	1	1	Fam122a	Other hits	MOLM14 specific	1.8139	3.15748	3.20856	2.40972
	53	TACACAACCTTAACCCTACAATTG	TRCN0000488224	3	3	HTR1B	Other hits	Core hit	1.66511	3.14779	2.87998	2.74943
	54	CGCGGCTACGTAGCTTTTTCATGA	TRCN0000472679	1	1	HOXC9	Other hits	MOLM14 specific	2.28404	3.12026	2.80238	2.78246
	55	CGTTCGGAATTCTGTGTTGTACCC	TRCN0000489575	5	1	BRAF	RAS/MAPK/ERK signaling	MOLM14 specific	1.67267	3.11551	2.69342	2.89224
	56	CAGCGGGCCGCAGTTTCCCGCCGC	TRCN0000467600	1	1	STRC	Other hits	MOLM14 specific	1.62695	3.11082	0.594435	5.16926
	57	TCGGACATATCGGTAGCCCTTAAC	TRCN0000466884	1	1	MECP2	Other hits	MOLM14 specific	2.29131	3.1051	1.95994	3.67153
	58	GCATATGGGCAGTAATGCTACTTC	TRCN0000466712	2	1	MLLT6	Other hits	MOLM14 specific	2.16849	3.06127	2.21912	3.30732
	59	CCGTATTAAACTATAGCCATACAG	TRCN0000488655	3	3	S1PR4	Other hits	MOLM14 specific	1.5533	3.054	2.59728	2.88192
	60	TGAATTGCCTGCAAATGATGATAT	TRCN0000472357	3	2	SUMO1	Other hits	MOLM14 specific	2.48384	3.05003	2.64224	2.82553
	61	ATGTGACGCCGCCTTGTGGCTATC	TRCN0000489451	3	3	HTR1B	Other hits	Core hit	1.7391	3.03074	2.907	2.50114
	62	TGTTAGAGCCGTACTTCATGTAGC	TRCN0000491770	2	1	ICA1	Other hits	MOLM14 specific	1.10013	3.0256	4.24167	1.03806
	63	CCCACTCCTTTTATCCACGTACAA	TRCN0000476472	1	1	WNT16	Other hits	MOLM14 specific	1.70465	3.02126	4.45927	0.79298
	64	TGCATTGATTCACATCGACTACTC	TRCN0000478185	4	1	CDK9	Other hits	MOLM14 specific	1.68248	3.00522	2.94116	2.41622
	65	GTGAATTTATGTCTCTATTTATTG	TRCN0000480103	1	1	NFE2L2	Other hits	MOLM14 specific	1.61328	2.98394	2.66869	2.67315
	66	GACGAAGCGACTAGGCCCGCAATC	TRCN0000491858	2	1	PTGER1	Other hits	MOLM14 specific	0.875275	2.97549	3.16908	2.11243
	67	GCCGTAAGTGCTAGAGCCTGCATC	TRCN0000489892	3	1	FFAR2	Other hits	Core hit	1.77715	2.96465	2.772	2.52457
	68	TGGTCAAAAAGAAACAAGATTCCT	TRCN0000475569	3	2	PIM3	Other hits	Core hit	1.23752	2.96446	3.07005	2.19964
	69	CGGGAAACCACGCAAATTTAATTC	TRCN0000468922	1	1	RIMBP2	Other hits	MOLM14 specific	1.56248	2.95977	0.675119	4.79897
	70	AGGCGCCGAGAGCAATCGATATGT	TRCN0000491334	3	1	CXCR4	Chemokine/Chemokine receptors	MOLM14 specific	1.4497	2.95614	2.97513	2.28746
	71	ACAGCACGTGTAGCGCAGTGAGGG	TRCN0000468539	3	1	CHRM2	Other hits	MOLM14 specific	1.25943	2.94944	0.905144	4.52916
	72	AGCGACGTGGAACCAAAAACTCAC	TRCN0000472347	1	1	SEPHS2	Other hits	MOLM14 specific	0.857138	2.93566	3.58423	1.58584
	73	TTATTGCACGAAAATGGTTAAAAG	TRCN0000473895	1	1	SLC6A20	Other hits	MOLM14 specific	0.737563	2.92227	2.79134	2.42428
	74	GTATTATTGAATAACAAGGGTCTC	TRCN0000489013	6	2	PTGER3	Other hits	MOLM14 specific	1.26771	2.9199	1.92388	3.36451
	75	TGGGTAATAACTGTGAGCGGGGTT	TRCN0000470291	1	1	HSF1	Other hits	MOLM14 specific	0.603856	2.90112	4.89131	0.0978333
	76	TGTCAGAGCTTCTATTACTCACCA	TRCN0000488074	3	1	GPR20	Other hits	MOLM14 specific	0.943523	2.89886	2.66774	2.5151
	77	TGCGCACGATATTATTTTTACCTT	TRCN0000479768	1	1	TFEB	Other hits	MOLM14 specific	0.693146	2.89205	2.82936	2.32636
	78	TGACGCTAGCAGGTGCGCATAAGT	TRCN0000489463	2	2	GPR82	Other hits	MOLM14 specific	1.3088	2.86095	2.34504	2.79565
	79	CGACCAGAAATTGTACTAACTCGG	TRCN0000491439	3	1	CCR3	Chemokine/Chemokine receptors	MOLM14 specific	1.09209	2.84125	2.75681	2.31038
	80	GGGTGGACCTAAGTTATAACGAGC	TRCN0000488281	3	2	PIM3	Other hits	Core hit	0.633834	2.81662	2.97521	2.0265
	81	GCTTGGTTATGTACAGAGGACTTG	TRCN0000471924	3	3	HTR1B	Other hits	Core hit	1.63511	2.79873	2.15326	2.88815
	82	ACTACAAAATTCGACGTTACGGCA	TRCN0000475202	1	1	MEOX1	Other hits	MOLM14 specific	1.72998	2.79672	2.60044	2.39741
	83	CCAGAGAACCAATTCTGCCACTCC	TRCN0000488322	2	1	PTGDR2	Other hits	MOLM14 specific	1.55566	2.78643	2.58437	2.39567
	84	GGGGTGACAAGATATGCTGACTAA	TRCN0000466006	3	3	PIM1	Other hits	Core hit	0.649836	2.78145	2.97277	1.96339
	85	TGTTATCCATAAATTTTCACTACC	TRCN0000474193	1	1	CRKL	RAS/MAPK/ERK signaling	Core hit	1.60109	2.76382	2.31432	2.64749
	86	CACGGTCTCTAGTGCACCCTAGTC	TRCN0000475266	1	1	ABLIM2	Other hits	MOLM14 specific	0.89806	2.75496	3.02719	1.8546
	87	TGCCGATGATATCCATACTTCAGC	TRCN0000489611	2	2	HTR1F	Other hits	Core hit	-0.276018	2.73153	2.01622	2.91174
	88	CTTCCGCCCTGACGGCCGGCTCCG	TRCN0000470946	1	1	MAGEB10	Other hits	MOLM14 specific	-0.581733	2.73021	3.33159	1.47683
	89	TCACGCAAGCCACTCCTGCTGTTC	TRCN0000471791	1	1	TADA2B	Other hits	MOLM14 specific	2.0312	2.72372	1.39937	3.56889
	90	CAATACTCTGTCGCTATCAATAGC	TRCN0000477429	2	2	HCAR1	Other hits	MOLM14 specific	1.53625	2.67805	2.36231	2.43484
	91	CAATGTATCCTACCGGCAATACTT	TRCN0000488237	2	2	LPAR1	Other hits	MOLM14 specific	1.49346	2.67129	2.79519	1.95079
	92	CGGACGCTATGATTTTTACCGCAA	TRCN0000472965	3	2	GPR34	Other hits	MOLM14 specific	1.63438	2.66	2.18947	2.58932
	93	GAGCGCCTCCGGAATAGGCAACTA	TRCN0000473906	3	3	S1PR4	Other hits	MOLM14 specific	1.68472	2.65605	2.43566	2.31384
	94	TACCGCAGGAGTCGGCAATACATG	TRCN0000479181	3	2	SUMO1	Other hits	MOLM14 specific	2.87244	2.65576	2.46857	2.27745
	95	CAAAATGCCATTTTTTAAATATCA	TRCN0000479959	3	2	RAF1	RAS/MAPK/ERK signaling	MOLM14 specific	0.671795	2.64773	2.40272	2.33416
	96	ACACATTTGGCAGGTGACCCCTCC	TRCN0000471020	1	1	SPIN4	Other hits	MOLM14 specific	1.50272	2.63607	1.85875	2.90474
	97	TTCTGAACCGGGTGGCCACGTGCT	TRCN0000487798	2	2	S1PR1	Other hits	Core hit	1.33295	2.63269	1.85514	2.90235
	98	TGACCCGCTTATTCTAAAAAATCG	TRCN0000489434	2	1	CXCR2	Chemokine/Chemokine receptors	Core hit	1.12382	2.62159	2.32305	2.37202
	99	CCAGACGGCGAAGTGCTCAGCGTA	TRCN0000478880	2	1	Ccdc28a	Other hits	MOLM14 specific	1.51933	2.60673	2.82756	1.79483
	100	TCCCCCTCGACAGTGGCCCCTCGC	TRCN0000473465	1	1	RPL18	Other hits	MOLM14 specific	1.35562	2.60513	1.57886	3.15168
	101	GCATTAGTCACCGACGTAGTGGCC	TRCN0000476278	1	1	STS	Other hits	MOLM14 specific	1.60891	2.60498	0.318724	4.5237
	102	TGCTGCGAAAATAACGCGGCGGCC	TRCN0000489702	2	1	HRAS	RAS/MAPK/ERK signaling	Core hit	-0.706029	2.59161	2.69166	1.91456
	103	GCGGCTCATTGTCAACTTTCAGGT	TRCN0000467359	1	1	FOXP4	Other hits	MOLM14 specific	1.27946	2.57584	2.61001	1.974
	104	CGCTATTTTGTTTTATTATAACAC	TRCN0000489150	2	2	LPAR1	Other hits	MOLM14 specific	1.65377	2.56701	1.59275	3.06529
	105	CGATTGTCATTCGGCCGACTATTC	TRCN0000466536	3	1	HIST2H2AA3	Other hits	MOLM14 specific	1.80941	2.55688	1.35954	3.30032
	106	CCCGAATCTGGACAGCGAGTCCTC	TRCN0000468154	1	1	CYTIP	Other hits	MOLM14 specific	1.42021	2.55521	1.03067	3.65533
	107	AACCTATTACAGCCGGGGGGAGCC	TRCN0000478908	1	1	MBNL2	Other hits	MOLM14 specific	1.1682	2.55339	2.1262	2.45888
	108	CAAACCAAGCAGATGGCTTTACCG	TRCN0000489610	3	1	SSTR4	Other hits	MOLM14 specific	0.748994	2.55064	2.30927	2.25438
	109	CAGGGATGGGGACCTGCTCTTTAT	TRCN0000488577	2	1	PIP4K2C	Other hits	MOLM14 specific	1.62542	2.53286	3.34613	1.092
	110	CGGATCTTCCTACATAGGCCATCA	TRCN0000492123	6	1	MET	Other hits	MOLM14 specific	0.371394	2.53216	2.5711	1.9347
	111	ATTCGCCAACATTATGCCGAGTGA	TRCN0000488442	2	2	MAPK1	RAS/MAPK/ERK signaling	MOLM14 specific	0.874078	2.51096	2.40179	2.07943
	112	CTGTTTCAGTGGCGGCAATATCAG	TRCN0000469960	1	1	DPM3	Other hits	MOLM14 specific	0.508965	2.50843	3.86983	0.475982
	113	AGGGCGAGCTCTTGTAAACTGAAA	TRCN0000470809	6	2	RPSA	Other hits	MOLM14 specific	1.47056	2.50662	3.14523	1.2617
	114	CAAGTACGATGCCTACATATAACA	TRCN0000480769	1	1	SPDYA	Other hits	MOLM14 specific	1.30418	2.50032	2.205	2.27383
	115	CGCAGACGAAATAGTCTAACCCAC	TRCN0000491993	1	1	HIST1H2BA	Other hits	MOLM14 specific	1.90112	2.49264	2.84962	1.55748
	116	GGCGCAGTTACTATTGACTTTCTC	TRCN0000472350	2	2	MAPK1	RAS/MAPK/ERK signaling	MOLM14 specific	0.980228	2.4907	1.74907	2.75235
	117	TGGGGCGTGGGTCTCATTGTATCG	TRCN0000488329	4	3	MAPK3	RAS/MAPK/ERK signaling	MOLM14 specific	0.804128	2.48584	1.80314	2.68441
	118	CCCTAGGACTGTTTTGAGTCGAGC	TRCN0000470873	1	1	CARS	Other hits	MOLM14 specific	1.37911	2.47051	-0.552122	5.22062
	119	TAGACCACCGCCACCAATCCAGAT	TRCN0000471233	1	1	ATOH7	Other hits	MOLM14 specific	1.59941	2.47042	2.28034	2.13588
	120	TGAAAATCGTAACACAATCGCCGA	TRCN0000488501	1	1	OR6K6	Other hits	MOLM14 specific	0.832487	2.45762	3.86101	0.390587
	121	TGGGGTACACTACTCGGACAAACC	TRCN0000492126	1	1	THEMIS2	Other hits	MOLM14 specific	1.48377	2.4517	3.07814	1.23207
	122	CCAACCCCTACGACAGTCGAGTGC	TRCN0000489472	2	1	SUCNR1	Other hits	MOLM14 specific	1.70335	2.44001	2.11342	2.26081
	123	GGCAACGGAACGTTATTAGGTACT	TRCN0000473471	4	1	RPLP0	Other hits	MOLM14 specific	1.32194	2.42552	2.2227	2.11469
	124	ATCATTCATAGAGTAAGACTGTAC	TRCN0000478789	4	4	PDGFRB	Growth factor receptors	Core hit	-1.09257	2.41711	0.535123	3.93676
	125	AGGTGTGTGAATAGTTAAGTATGA	TRCN0000489909	3	3	PIM1	Other hits	Core hit	0.0355672	2.40462	2.79799	1.44913
	126	TGAAGAGACCCTCGCTAGATCGCA	TRCN0000492361	4	1	DRD2	Other hits	MOLM14 specific	1.14845	2.3937	1.91793	2.38711
	127	TAGTTCATAAAGTCCTGTACGTTG	TRCN0000478604	2	1	NLK	Other hits	MOLM14 specific	0.273875	2.38999	2.25248	2.01584
	128	CCGTGCTGTTACTAATCCTGTGTC	TRCN0000492279	1	1	PITHD1	Other hits	MOLM14 specific	0.760941	2.38601	2.43769	1.8067
	129	CATGCATTCCGATAATTGCATCCC	TRCN0000475211	2	1	FGFBP1	Other hits	MOLM14 specific	1.50245	2.3588	1.11936	3.19151
	130	CCCGGTAAGACCGAATGTGCAGTG	TRCN0000470772	1	1	TMEM243	Other hits	MOLM14 specific	1.58974	2.35528	2.48768	1.69479
	131	CCCATGGGCACGACATATCCGCGC	TRCN0000474913	1	1	PIGQ	Other hits	MOLM14 specific	1.03312	2.35318	4.06347	-0.0251578
	132	CGTACCAGTCTACACCCGTCGTGG	TRCN0000479853	2	2	GPR183	Other hits	MOLM14 specific	1.50078	2.34485	2.65435	1.49379
	133	AGATGAAATCGAAGTGTCCGTAAC	TRCN0000491982	3	1	P2RY12	Other hits	MOLM14 specific	1.27758	2.3444	2.30154	1.87717
	134	GCGAGAAGCACATGGGGCTGTTCG	TRCN0000476642	1	1	CSF3	Chemokine/Chemokine receptors	Core hit	1.44826	2.34409	2.19275	1.99506
	135	CCCAAAGGATTCGTGCTTCAACGT	TRCN0000467348	6	2	RPSA	Other hits	MOLM14 specific	2.20257	2.33559	1.54479	2.6848
	136	ACGAATCAGCTTAATCGTCTTCTC	TRCN0000488094	3	1	MAP3K5	Other hits	MOLM14 specific	0.28118	2.33323	3.71321	0.318969
	137	GCTGATGTACGTTCGTCCCGGGCT	TRCN0000488687	4	3	MAPK3	RAS/MAPK/ERK signaling	MOLM14 specific	0.498113	2.32829	2.4489	1.68656
	138	CTACTGAGCTGATTTAACATGCGA	TRCN0000480470	1	1	GSDMD	Other hits	MOLM14 specific	1.37897	2.31751	3.60121	0.411528
	139	ACACCCGCTTGAGCTACACACACC	TRCN0000487742	4	4	PDGFRB	Growth factor receptors	Core hit	-0.911805	2.31597	3.10604	0.947906
	140	ACAATGCTAGCAAATCCGATAACC	TRCN0000468053	1	1	CASP14	Other hits	MOLM14 specific	0.981714	2.30441	3.82173	0.146897
	141	CGCGGTCGACCAGAGTATGATTGG	TRCN0000474952	1	1	CAPN2	Other hits	MOLM14 specific	0.718955	2.2999	3.33038	0.673553
	142	CGTGGTTAGAGCTGTGTCAAACCG	TRCN0000489793	2	2	HTR1F	Other hits	Core hit	1.51832	2.29597	1.01421	3.18852
	143	TTTTGCCACTACTCGGCCACGTTG	TRCN0000474076	2	1	ARHGEF3	Other hits	MOLM14 specific	1.11026	2.27506	0.101179	4.14372
	144	TGCATCCGGATCGTACGTGCTCTC	TRCN0000487810	3	1	HTR1D	Other hits	MOLM14 specific	0.900507	2.26527	2.18017	1.86137
	145	CCTGGTCTAATTAACGCCACTTTC	TRCN0000488387	2	1	FFAR3	Other hits	MOLM14 specific	1.18612	2.26284	1.89633	2.16594
	146	AAACTCAAGCTAGCGACTCCTGGC	TRCN0000489570	3	1	CCR8	Other hits	MOLM14 specific	0.769407	2.26085	3.88991	-0.00880387
	147	CGATGCGCTATTTAAGTTACGGAA	TRCN0000478805	1	1	TCL1A	Other hits	MOLM14 specific	1.44305	2.25892	2.29995	1.71906
	148	ACCAACCCCTCGTCAGTCAGCATA	TRCN0000480791	1	1	FAM122B	Other hits	MOLM14 specific	1.79404	2.25025	1.84103	2.20263
	149	CTATACACCATTGACTGTCGGCCA	TRCN0000470761	1	1	NPHP3	Other hits	MOLM14 specific	1.19819	2.2368	2.67904	1.26488
	150	TCCAACGCAGCACACTCACTGTGG	TRCN0000466691	2	1	GCSH	Other hits	MOLM14 specific	1.55735	2.23611	2.93337	0.98661
	151	TGATGCAACTCCCATTCACCCTGT	TRCN0000488722	4	3	MAPK3	RAS/MAPK/ERK signaling	MOLM14 specific	0.519483	2.23263	2.07542	1.91442
	152	CTACCACTCGGCATGCCGGGTATG	TRCN0000467378	2	1	SPANXA1	Other hits	MOLM14 specific	1.3973	2.22954	3.24814	0.631556
	153	CGGCGTACCTGTGTTTTGATTGAG	TRCN0000465236	1	1	DPH3	Other hits	MOLM14 specific	1.45006	2.22708	2.88487	1.02256
	154	TCCAGGACTTCTACTATTCCGACA	TRCN0000487864	4	1	CLK4	Other hits	MOLM14 specific	-0.275604	2.22622	2.15772	1.81281
	155	TGGCTCCTCACAGTAAGTGCAGAC	TRCN0000465918	1	1	HEXIM2	Other hits	MOLM14 specific	1.33306	2.21421	2.45899	1.46226
	156	CTCTATGTGATTTAAAAGACCTAA	TRCN0000473330	3	1	GPR152	Other hits	MOLM14 specific	0.290311	2.21094	2.82254	1.06024
	157	GAGCTTCGGTTTCTTGCCTTCCAC	TRCN0000489290	2	2	GALR1	Other hits	Core hit	1.08649	2.20115	1.41407	2.57579
	158	TGCAGCTTTACAACATGCACTCTG	TRCN0000468394	1	1	PDE6D	Other hits	MOLM14 specific	1.4457	2.19	2.65024	1.20873
	159	CGTGCCTCGTCCCGATTTAGCTAT	TRCN0000488235	2	2	GPR82	Other hits	MOLM14 specific	1.11386	2.1867	2.45508	1.41508
	160	AGCCCAACGAGTGCGATAGTGCGA	TRCN0000475170	1	1	NINJ2	Other hits	MOLM14 specific	1.69294	2.1866	2.43158	1.4405
	161	AGCATCCATTGGGCTCACCCTTAG	TRCN0000471319	1	1	NATD1	Other hits	MOLM14 specific	0.964206	2.18265	2.71171	1.12806
	162	ATACAAGAACGATCGTGATATACA	TRCN0000471212	1	1	CSF2	Chemokine/Chemokine receptors	Core hit	1.54994	2.18171	1.39886	2.556
	163	CACGTTACAAGTGGAGTCAGTTCA	TRCN0000488406	4	1	ZAP70	Other hits	MOLM14 specific	2.04804	2.17946	1.50582	2.43531
	164	AGGTTAACTCATATGTTAACTCGG	TRCN0000492301	2	1	FRMD3	Other hits	MOLM14 specific	0.460527	2.17891	2.07727	1.81198
	165	TGAGGTCAAGATATACCTTATGCA	TRCN0000481315	1	1	RASSF6	Other hits	MOLM14 specific	0.300833	2.17253	1.69069	2.22102
	166	CCAGAGGACCTAGAGCAGGACAAC	TRCN0000473257	1	1	GSTP1	Other hits	MOLM14 specific	1.41852	2.16799	1.92827	1.95381
	167	TGGTGACGAATGCACTAACCTGCC	TRCN0000471825	1	1	ESD	Other hits	MOLM14 specific	1.00676	2.15929	1.70862	2.17674
	168	GGGCAGCCGAAGAGTGATGTGACA	TRCN0000467505	1	1	CBR1	Other hits	MOLM14 specific	1.50706	2.15762	2.25903	1.57422
	169	TGGGATTCTTTATGCGCGAATGCC	TRCN0000475405	3	1	EIF2S2	Other hits	MOLM14 specific	1.50819	2.14718	0.302663	3.68519
	170	CATTGTCTACCGGTTTAACTCAAT	TRCN0000467520	3	1	RBM4	Other hits	MOLM14 specific	0.384863	2.1395	2.37214	1.41717
	171	GGCGGTGGCGGCGTCTACTCACCC	TRCN0000467603	1	1	SLC17A4	Other hits	MOLM14 specific	0.659728	2.13504	2.45957	1.31362
	172	CCCACCGCTCAATTGTTCGTAGCC	TRCN0000468448	1	1	CD27	Other hits	MOLM14 specific	0.967009	2.13037	1.16517	2.71448
	173	ACGAGCTTTTTCACGCGCCGGTTT	TRCN0000481008	1	1	RANBP3L	Other hits	MOLM14 specific	1.73159	2.12642	2.05954	1.73313
	174	TGCCAACTAAAGGGTTGTAAGTAT	TRCN0000475046	1	1	RPF2	Other hits	MOLM14 specific	1.02388	2.11994	2.32224	1.43493
	175	ACAGGCACTACGGCCCTACTAGAA	TRCN0000492091	2	1	CNR2	Other hits	Core hit	1.66571	2.11121	1.39929	2.42371
	176	CGCGCAGAGAGTGGTAGCATGAGA	TRCN0000472603	2	1	BCL2L1	Other hits	MOLM14 specific	1.53213	2.10636	2.05161	1.70425
	177	CTGCGATCTAATACCCTCCTTAAG	TRCN0000488897	4	1	ERBB4	Growth factor receptors	MOLM14 specific	-0.541958	2.09908	3.03811	0.616334
	178	CGTCGATTGGCGGAGATGTTTTCT	TRCN0000474578	1	1	CNPY3	Other hits	MOLM14 specific	1.60628	2.09719	2.60155	1.08822
	179	CTCAACAGGGGAATCCGTTACGGA	TRCN0000476174	1	1	OR7A5	Other hits	MOLM14 specific	1.2874	2.09587	1.58196	2.1961
	180	ATGCATGCCCGCAGCTGAAATGTC	TRCN0000481389	3	3	PIM1	Other hits	Core hit	0.0273111	2.09533	2.38692	1.31848
	181	CCAATTAGCTTCCAACTTATCCCT	TRCN0000480334	1	1	FGFR1OP2	Other hits	MOLM14 specific	1.38991	2.08842	0.637945	3.2102
	182	CATTAGCAACTTTCTTTGTCCTCA	TRCN0000466042	4	1	P2RY13	Other hits	MOLM14 specific	0.974037	2.08179	1.63647	2.11039
	183	TCGCAGGTTTGCCACGAATGCCTC	TRCN0000475926	2	1	HTR1E	Other hits	Core hit	0.505365	2.0815	1.75175	1.98432
	184	TGAACAATCTGTCTGGCTTTCACA	TRCN0000467416	3	1	STAU2	Other hits	MOLM14 specific	1.44882	2.06949	2.55109	1.09138
	185	CGCATTAGCAGTCCGAGAACAGTT	TRCN0000491381	2	1	PKN3	Other hits	MOLM14 specific	-0.383502	2.06463	3.55977	-0.0161614
	186	GGACTAGACAGGTCGTTTGTCTGT	TRCN0000467867	1	1	IL3	Chemokine/Chemokine receptors	Core hit	1.7584	2.0596	1.9227	1.75721
	187	AGAAGGGGACCTTGATTCCCGAAA	TRCN0000477302	2	1	FCRL2	Other hits	MOLM14 specific	1.18922	2.05646	2.70481	0.899604
	188	CCGTCGCATGGGTCTTTGTAAGAA	TRCN0000470114	2	1	DCAF10	Other hits	MOLM14 specific	1.62939	2.05631	1.05847	2.6922
	189	GGGGTTCAGCCTTTAGCCCAACGC	TRCN0000487905	2	2	GPR183	Other hits	MOLM14 specific	2.07231	2.0562	1.35196	2.3724
	190	CTGCACAACTGACACCTCTCTGTT	TRCN0000488853	5	1	GPR87	Other hits	Core hit	1.57889	2.05534	1.65638	2.03926
	191	TGGTACCCCGTTAAAGGTCTAAGC	TRCN0000475846	2	1	CCDC189	Other hits	MOLM14 specific	1.14682	2.05494	2.5456	1.07015
	192	CGCACCTCCGCGAGCGCGGACTAC	TRCN0000475802	1	1	FTCD	Other hits	MOLM14 specific	1.35392	2.05008	2.2961	1.33276
	193	CCCCCTATTCGAATCAAACGGGCT	TRCN0000478613	1	1	POLD1	Other hits	MOLM14 specific	0.280563	2.04688	-2.42148	6.46427
	194	CCTTCACAAATCATTCCAAACCGG	TRCN0000468211	2	1	GRIN2A	Other hits	MOLM14 specific	0.30077	2.03887	1.51859	2.15852
	195	TGGCCGGCTCGCATGCAGCAGGGG	TRCN0000473551	1	1	COL18A1-AS1	Other hits	MOLM14 specific	1.53034	2.02392	1.81148	1.81161
	196	CACACGAATACCCCGGTTTGGTAC	TRCN0000479244	1	1	ACSL6	Other hits	MOLM14 specific	0.557353	2.02114	1.87535	1.73686
	197	CCACCCCCGTATAGAATTTGGTAA	TRCN0000469718	1	1	GATA1	Other hits	MOLM14 specific	1.60665	2.01772	1.72605	1.89305
	198	CGTGGTACGCCAGCATATGCCAGA	TRCN0000479820	1	1	LOC105376844	Other hits	MOLM14 specific	1.70848	2.0154	1.21068	2.44996
	199	TGTACTTGGATAGATGCAGACCCC	TRCN0000469232	2	1	CCL3L1	Chemokine/Chemokine receptors	MOLM14 specific	1.83506	2.01526	1.06484	2.60852
	200	CTCTCCACTGGTTAATGCTTGCTG	TRCN0000489021	3	1	RXFP4	Other hits	MOLM14 specific	1.08911	2.01239	1.7769	1.82771
	201	CATTGAATCTTCATGTCCCACCAG	TRCN0000466266	3	1	ACKR2	Other hits	MOLM14 specific	1.53276	2.01201	1.29663	2.35003
	202	CCGAAGGGTAGACACAGTTACCTA	TRCN0000488138	3	1	AGTRAP	Other hits	MOLM14 specific	0.877608	2.00902	2.22088	1.33792
	203	GAATTCCCTAGGTCATCCTGAGGA	TRCN0000480944	1	1	CDRT15	Other hits	MOLM14 specific	1.16428	2.00208	1.74966	1.8381

## Sheet: Table_S6_ORF_Core hits
	#	Core gene	Pathway	# clones genome-wide	# clones MV-411 hits	# clones MOLM14 hits	MV4-11 z-score Ent.vs.ETP	MOLM14 z-score Ent.vs.ETP	average z-scores
	1	PDGFRB	Growth factor receptors	4	1	4	2.84709	8.77834	5.81271
	2	EGFR	Growth factor receptors	12	4	4	3.7115	7.24402	5.47776
	3	ROS1		1	1	1	4.14661	6.57699	5.3618
	4	CCND3		1	1	1	4.04823	6.26378	5.15601
	5	HRAS	RAS/MAPK/ERK signaling	2	1	1	7.31424	2.59161	4.95293
	6	CSF2	Chemokine/Chemokine receptors	1	1	1	7.24833	2.18171	4.71502
	7	IL3	Chemokine/Chemokine receptors	1	1	1	6.56318	2.0596	4.31139
	8	PDGFRA	Growth factor receptors	4	1	1	2.36863	6.02988	4.19926
	9	KRAS	RAS/MAPK/ERK signaling	4	1	1	2.68957	5.46514	4.07736
	10	PIM2		3	3	3	3.83814	4.06046	3.9493
	11	PIM1		3	3	3	4.99863	2.78145	3.89004
	12	PIM3		3	3	2	4.57222	2.96446	3.76834
	13	S1PR1		2	2	2	2.52592	3.88334	3.20463
	14	CXCR2	Chemokine/Chemokine receptors	2	1	1	3.73833	2.62159	3.17996
	15	GPR17		2	1	1	2.86118	3.30825	3.08472
	16	CRKL	RAS/MAPK/ERK signaling	1	1	1	3.02251	2.76382	2.89317
	17	GALR1		2	1	2	2.01201	3.64582	2.82891
	18	HTR1B		3	2	3	2.45239	3.14779	2.80009
	19	FFAR2		3	1	1	2.5368	2.96465	2.75072
	20	HTR1F		2	1	2	2.7006	2.73153	2.71607
	21	CSF3	Chemokine/Chemokine receptors	1	1	1	2.63613	2.34409	2.49011
	22	CNR2		2	1	1	2.80346	2.11121	2.45733
	23	GPR87		5	2	1	2.33495	2.05534	2.19514
	24	HTR1E		2	1	1	2.25954	2.0815	2.17052

## Sheet: Table_S7_mutations
	#	Data	Gene GRCh37p13	Chr	Start	End	Reference Allele	Tumor Allele	Variant Classification	Protein Change	cDNA Change	Parental genotype (IUPAC)	Resistant genotype (IUPAC)	Parental var_freq	Resistant var_freq	Delta var_freq	Somatic status	Somatic p_value	dbSNP v142	COSMIC v90
	1	WES_Data1	NADK	1	1686040	1686040	G	T	nonsynonymous SNV	p.N230K	c.C690A	K	K	0.39	0.5258	0.1358	Germline	0.038278	rs4751	COSM424509
	2	WES_Data1	MMEL1	1	2526746	2526746	A	G	nonsynonymous SNV	p.M518T	c.T1553C	R	R	0.3636	0.5294	0.1658	Germline	0.0248003	rs3748816	COSM3746907
	3	WES_Data1	PER3	1	7897133	7897133	A	G	nonsynonymous SNV	p.H1158R	c.A3473G	R	R	0.587	0.3333	-0.2537	Germline	0.000777818	rs10462021	COSM3751396
	4	WES_Data1	SPATA21	1	16736327	16736327	G	A	nonsynonymous SNV	p.P119L	c.C356T	R	R	0.2963	0.5429	0.2466	Germline	0.0454766	rs41269197	COSM3750556
	5	WES_Data1	PODN	1	53527901	53527901	G	T	nonsynonymous SNV	p.A4S	c.G10T	G	K	0	0.2333	0.2333	Somatic	4.87293e-05	.
	6	WES_Data1	GLIS1	1	54060016	54060016	G	C	nonsynonymous SNV	p.A187G	c.C560G	S	S	0.4615	0.5935	0.132	Germline	0.0212996	rs35227000	COSM3751299
	7	WES_Data1	MRPL37	1	54681920	54681920	G	C	nonsynonymous SNV	p.C366S	c.G1097C	S	S	0.3974	0.5542	0.1568	Germline	0.0332669	rs13571
	8	WES_Data1	SYDE2	1	85647971	85647971	C	T	nonsynonymous SNV	p.R785K	c.G2354A	C	Y	0	0.4472	0.4472	Somatic	2.76973e-17	.
	9	WES_Data1	SLC44A3	1	95330372	95330372	G	A	nonsynonymous SNV	p.V402I	c.G1204A	R	R	0.4141	0.5778	0.1637	Germline	0.0176561	rs859098	COSM4165352
	10	WES_Data1	KIAA1324	1	109735416	109735416	A	C	nonsynonymous SNV	p.T285P	c.A853C	M	M	0.3667	0.5263	0.1596	Germline	0.0459089	rs659543	COSM4142096
	11	WES_Data1	PDE4DIP	1	144880832	144880832	T	C	nonsynonymous SNV	p.K1428E	c.A4282G	T	Y	0.1846	0.3243	0.1397	Somatic	0.0455228	.
	12	WES_Data1	FAM231D;LOC100996741;LOC388692	1	149290779	149290779	T	G	nonsynonymous SNV	p.L84R	c.T251G	T	K	0.0667	0.2222	0.1555	Somatic	0.0344929	rs828281	COSN19640418
	13	WES_Data1	TDRD10	1	154516477	154516477	G	A	nonsynonymous SNV	p.R181Q	c.G542A	R	R	0.3871	0.5704	0.1833	Germline	0.00231959	rs12750774	COSM146636
	14	WES_Data1	FCRLA	1	161683136	161683136	G	A	nonsynonymous SNV	p.R131Q	c.G392A	R	R	0.6832	0.4526	-0.2306	Germline	0.000886489	rs11746	COSM3735938
	15	WES_Data1	ADCY10	1	167825485	167825485	T	C	nonsynonymous SNV	p.I544V	c.A1630G	Y	Y	0.3864	0.5496	0.1632	Germline	0.0056408	rs2071921	COSM3750558
	16	WES_Data1	CCDC181	1	169390957	169390957	A	T	nonsynonymous SNV	p.F238I	c.T712A	W	W	0.3333	0.5581	0.2248	Germline	0.0339186	rs35107735
	17	WES_Data1	ZNF648	1	182026596	182026596	C	T	nonsynonymous SNV	p.A184T	c.G550A	Y	Y	0.5409	0.381	-0.1599	Germline	0.00156672	rs146081397	COSM4025849
	18	WES_Data1	PRG4	1	186280620	186280620	C	G	nonsynonymous SNV	p.P1095A	c.C3283G	C	S	0	0.5076	0.5076	Somatic	9.99917e-26	.
	19	WES_Data1	PPP1R15B	1	204379452	204379452	T	C	nonsynonymous SNV	p.E363G	c.A1088G	Y	Y	0.4526	0.5872	0.1346	Germline	0.0375465	rs2089891	COSM3735950
	20	WES_Data1	DNAH14	1	225268343	225268343	A	G	nonsynonymous SNV	p.K1010R	c.A3029G	R	R	0.3936	0.5957	0.2021	Germline	0.00423631	rs3128651	COSM5432523
	21	WES_Data1	DNAH14	1	225268346	225268346	G	A	nonsynonymous SNV	p.R1011Q	c.G3032A	R	R	0.43	0.5631	0.1331	Germline	0.0394249	rs3128652	COSM5432526
	22	WES_Data1	JMJD4	1	227922918	227922918	A	C	nonsynonymous SNV	p.D65E	c.T195G	M	M	0.4254	0.5659	0.1405	Germline	0.015477	rs2295994	COSM3749032
	23	WES_Data1	RYR2	1	237730059	237730059	C	T	nonsynonymous SNV	p.A1136V	c.C3407T	Y	Y	0.4205	0.5686	0.1481	Germline	0.0291425	rs72549415
	24	WES_Data1	ACP1	2	277003	277003	A	G	nonsynonymous SNV	p.Q106R	c.A317G	R	G	0.36	0.8462	0.4862	LOH	0.00517878	rs79716074	COSM4986434
	25	WES_Data1	TRIM54	2	27529154	27529154	G	A	nonsynonymous SNV	p.V314I	c.G940A	R	R	0.4178	0.5535	0.1357	Germline	0.0120495	rs142922734	COSM5571308
	26	WES_Data1	PLB1	2	28824793	28824793	C	G	nonsynonymous SNV	p.H868D	c.C2602G	S	S	0.3944	0.5432	0.1488	Germline	0.0471801	rs7601771	COSM3758194
	27	WES_Data1	ABCG8	2	44104925	44104925	T	C	nonsynonymous SNV	p.V632A	c.T1895C	Y	Y	0.363	0.575	0.212	Germline	0.000532697	rs6544718
	28	WES_Data1	USP34	2	61575308	61575308	A	G	nonsynonymous SNV	p.M661T	c.T1982C	R	R	0.4651	0.5814	0.1163	Germline	0.0403842	rs6722430
	29	WES_Data1	ALMS1	2	73680508	73680508	G	C	nonsynonymous SNV	p.R2284P	c.G6851C	S	S	0.4158	0.53	0.1142	Germline	0.0124993	rs6546839
	30	WES_Data1	SLC20A1	2	113404721	113404721	T	A	nonsynonymous SNV	p.S106T	c.T316A	T	W	0	0.4674	0.4674	Somatic	6.35393e-15	.
	31	WES_Data1	ITGA6	2	173339808	173339808	G	A	nonsynonymous SNV	p.A380T	c.G1138A	R	R	0.4333	0.6087	0.1754	Germline	0.0347442	rs11895564	COSM3757775
	32	WES_Data1	PLCL1	2	198950240	198950240	G	A	nonsynonymous SNV	p.V667I	c.G1999A	R	R	0.3821	0.5091	0.127	Germline	0.0214527	rs1064213	COSM3736232
	33	WES_Data1	UGT1A5	2	234622310	234622310	C	T	nonsynonymous SNV	p.H225Y	c.C673T	Y	Y	0.4321	0.5922	0.1601	Germline	0.0221039	rs17862867	COSM4001556
	34	WES_Data1	UGT1A5	2	234622412	234622412	G	C	nonsynonymous SNV	p.G259R	c.G775C	S	S	0.3571	0.5224	0.1653	Germline	0.0488025	rs3892170	COSM4001559
	35	WES_Data1	MROH2A	2	234741808	234741808	C	T	nonsynonymous SNV	p.P1657L	c.C4970T	Y	Y	0.4225	0.5664	0.1439	Germline	0.0400589	rs2270856
	36	WES_Data1	ASB18	2	237103697	237103697	G	T	nonsynonymous SNV	p.H407N	c.C1219A	K	K	0.3438	0.5593	0.2155	Germline	0.039954	rs10177957
	37	WES_Data1	ESPNL	2	239039841	239039841	A	G	nonsynonymous SNV	p.Q461R	c.A1382G	R	R	0.4045	0.5543	0.1498	Germline	0.030691	rs10172220	COSM4133580
	38	WES_Data1	HDLBP	2	242192848	242192848	T	C	nonsynonymous SNV	p.N385S	c.A1154G	Y	Y	0.5952	0.3646	-0.2306	Germline	0.00157747	rs7578199	COSM3736253
	39	WES_Data1	ZNF860	3	32031615	32031615	A	C	nonsynonymous SNV	p.E348D	c.A1044C	M	M	0.2727	0.4861	0.2134	Germline	0.0115791	rs13064905	COSM3823664
	40	WES_Data1	ZNF860	3	32031622	32031622	T	C	nonsynonymous SNV	p.F351L	c.T1051C	Y	Y	0.2759	0.4459	0.17	Germline	0.0333177	rs13087612	COSM1495505
	41	WES_Data1	PDCD6IP	3	33879770	33879770	G	A	nonsynonymous SNV	p.V383I	c.G1147A	R	R	0.4074	0.5965	0.1891	Germline	0.0355747	rs3203777	COSM149352
	42	WES_Data1	KBTBD8	3	67054649	67054649	T	C	nonsynonymous SNV	p.C420R	c.T1258C	Y	Y	0.426	0.5506	0.1246	Germline	0.0134114	rs13096789
	43	WES_Data1	SUCLG2	3	67411166	67411166	A	G	nonsynonymous SNV	p.Y404H	c.T1210C	R	R	0.2	0.6	0.4	Somatic	0.0302165	rs902321	COSM3824580
	44	WES_Data1	ZNF654	3	88188420	88188420	G	A	nonsynonymous SNV	p.S421N	c.G1262A	R	R	0.4419	0.6216	0.1797	Germline	0.0452231	rs9813894
	45	WES_Data1	SIDT1	3	113251962	113251962	C	A	nonsynonymous SNV	p.P32T	c.C94A	M	M	0.5276	0.6727	0.1451	Germline	0.0160537	rs61738949
	46	WES_Data1	FOXL2	3	138665029	138665029	G	C	nonsynonymous SNV	p.A179G	c.C536G	S	S	0.4286	0.6076	0.179	Germline	0.0164679	rs7432551	COSM4600643
	47	WES_Data1	TNIK	3	170843910	170843910	C	T	nonsynonymous SNV	p.G518R	c.G1552A	C	Y	0	0.6829	0.6829	Somatic	1.65181e-13	.
	48	WES_Data1	MUC20	3	195452951	195452951	G	C	nonsynonymous SNV	p.D493H	c.G1477C	S	S	0.4026	0.5217	0.1191	Germline	0.0272293	rs2688542	COSM446212
	49	WES_Data1	TNK2	3	195594950	195594950	G	A	nonsynonymous SNV	p.P757L	c.C2270T	R	R	0.3333	0.5741	0.2408	Germline	0.00750229	rs56260729
	50	WES_Data1	DOK7	4	3494600	3494600	A	G	nonsynonymous SNV	p.Q296R	c.A887G	R	R	0.4207	0.5226	0.1019	Germline	0.0493129	rs6811423	COSM447809
	51	WES_Data1	PSAPL1	4	7435058	7435058	C	T	nonsynonymous SNV	p.A517T	c.G1549A	Y	Y	0.4231	0.6044	0.1813	Germline	0.0138548	rs60816800	COSM3760724
	52	WES_Data1	SLC2A9	4	10022981	10022981	C	T	nonsynonymous SNV	p.G25R	c.G73A	Y	Y	0.3125	0.6207	0.3082	Germline	0.00140746	rs2276961	COSM149645
	53	WES_Data1	PTTG2	4	37962186	37962186	G	C	nonsynonymous SNV	p.R44P	c.G131C	S	S	0.3267	0.47	0.1433	Germline	0.0266133	rs6811863
	54	WES_Data1	HOPX	4	57514941	57514941	G	T	nonsynonymous SNV	p.A56E	c.C167A	G	K	0	0.2027	0.2027	Somatic	8.2241e-06	rs758285250
	55	WES_Data1	MTTP	4	100504664	100504664	T	C	nonsynonymous SNV	p.I155T	c.T464C	Y	Y	0.4333	0.6196	0.1863	Germline	0.00883406	rs3816873	COSM1131316
	56	WES_Data1	ALPK1	4	113352628	113352628	A	G	nonsynonymous SNV	p.H564R	c.A1691G	R	R	0.382	0.5091	0.1271	Germline	0.0495161	rs13148353
	57	WES_Data1	SCOC	4	141294814	141294814	G	C	nonsynonymous SNV	p.V42L	c.G124C	S	S	0.2917	0.5946	0.3029	Germline	0.0194157	rs2271430
	58	WES_Data1	DDX60L	4	169282355	169282355	T	C	nonsynonymous SNV	p.M1646V	c.A4936G	T	Y	0.1875	0.56	0.3725	Somatic	0.0192775	rs2684348	COSM4005705
	59	WES_Data1	WWC2	4	184192278	184192278	G	T	nonsynonymous SNV	p.V816F	c.G2446T	K	K	0.4186	0.6207	0.2021	Germline	0.0348684	rs11734376
	60	WES_Data1	DNAH5	5	13944512	13944512	A	C	nonsynonymous SNV	p.H12Q	c.T36G	M	M	0.425	0.6383	0.2133	Germline	0.0378334	rs339445
	61	WES_Data1	C5orf22	5	31538692	31538692	A	C	nonsynonymous SNV	p.T235P	c.A703C	M	M	0.4049	0.5118	0.1069	Germline	0.0323543	rs17410000	COSM3761196
	62	WES_Data1	BDP1	5	70837295	70837295	A	C	nonsynonymous SNV	p.I2013L	c.A6037C	M	M	0.2	0.6111	0.4111	Somatic	0.0114431	rs6453014	COSM4408394
	63	WES_Data1	PCDHGA1	5	140712271	140712271	G	T	nonsynonymous SNV	p.D674Y	c.G2020T	G	K	0	0.3667	0.3667	Somatic	2.99523e-05	.
	64	WES_Data1	FCHSD1	5	141021096	141021096	G	A	nonsynonymous SNV	p.P681L	c.C2042T	R	R	0.2857	0.5714	0.2857	Germline	0.0040805	rs32957	COSM5019419
	65	WES_Data1	PCDH12	5	141336264	141336264	G	T	nonsynonymous SNV	p.H385N	c.C1153A	K	K	0.4138	0.5305	0.1167	Germline	0.0354966	rs164075	COSM5959151
	66	WES_Data1	NR3C1	5	142779317	142779317	T	C	nonsynonymous SNV	p.N363S	c.A1088G	Y	Y	0.4361	0.5969	0.1608	Germline	0.00648853	rs56149945
	67	WES_Data1	NR3C1	5	142780337	142780337	C	T	nonsynonymous SNV	p.R23K	c.G68A	Y	Y	0.5806	0.337	-0.2436	Germline	0.000707173	rs6190
	68	WES_Data1	UIMC1	5	176338356	176338356	C	G	nonsynonymous SNV	p.K544N	c.G1632C	C	S	0	0.2	0.2	Somatic	0.000910669	.
	69	WES_Data1	NQO2	6	3010298	3010298	A	G	nonsynonymous SNV	p.K16R	c.A47G	R	R	0.5472	0.7143	0.1671	Germline	0.0326977	rs28383623
	70	WES_Data1	PRPF4B	6	4031998	4031998	A	G	nonsynonymous SNV	p.I83V	c.A247G	R	R	0.4776	0.6215	0.1439	Germline	0.0299026	rs9503893
	71	WES_Data1	RREB1	6	7230680	7230680	G	T	nonsynonymous SNV	p.G783V	c.G2348T	K	K	0.5259	0.665	0.1391	Germline	0.000295809	rs9502564	COSM4908590
	72	WES_Data1	RREB1	6	7231843	7231843	G	A	nonsynonymous SNV	p.D1171N	c.G3511A	R	R	0.4882	0.3163	-0.1719	Germline	0.000182539	rs9379084	COSM1742059
	73	WES_Data1	RREB1	6	7246998	7246998	G	A	nonsynonymous SNV	p.G1384R	c.G4150A	R	R	0.4	0.6773	0.2773	Germline	1.46505e-08	rs2281833	COSM1487903
	74	WES_Data1	RREB1	6	7247248	7247248	T	C	nonsynonymous SNV	p.L1467P	c.T4400C	Y	Y	0.4951	0.6688	0.1737	Germline	0.00401312	rs2256596
	75	WES_Data1	SYCP2L	6	10898308	10898308	C	T	nonsynonymous SNV	p.S134L	c.C401T	Y	Y	0.5455	0.3421	-0.2034	Germline	0.00112265	rs189323193
	76	WES_Data1	HIVEP1	6	12123249	12123249	A	G	nonsynonymous SNV	p.N1074S	c.A3221G	R	R	0.5376	0.6871	0.1495	Germline	0.000698169	rs2228220	COSM4003670
	77	WES_Data1	EDN1	6	12296255	12296255	G	T	nonsynonymous SNV	p.K197N	c.G591T	K	K	0.4146	0.592	0.1774	Germline	0.00186828	rs5370	COSM150053
	78	WES_Data1	MCUR1	6	13801615	13801615	T	C	nonsynonymous SNV	p.T216A	c.A646G	Y	Y	0.3889	0.7241	0.3352	Germline	0.024382	rs3180196	COSM150055
	79	WES_Data1	MYLIP	6	16145325	16145325	A	G	nonsynonymous SNV	p.N342S	c.A1025G	R	R	0.5475	0.338	-0.2095	Germline	6.85224e-06	rs9370867	COSM4999246
	80	WES_Data1	NUP153	6	17675246	17675246	T	C	nonsynonymous SNV	p.I248V	c.A742G	Y	Y	0.4588	0.6757	0.2169	Germline	0.000960892	rs2228375	COSM4783709
	81	WES_Data1	NRSN1	6	24145896	24145896	C	T	nonsynonymous SNV	p.H104Y	c.C310T	Y	Y	0.5172	0.3182	-0.199	Germline	0.00189134	rs11544636
	82	WES_Data1	DCDC2	6	24291203	24291203	T	C	nonsynonymous SNV	p.S221G	c.A661G	Y	Y	0.3578	0.6	0.2422	Germline	9.17886e-05	rs2274305	COSM3761724
	83	WES_Data1	GPLD1	6	24489652	24489652	C	T	nonsynonymous SNV	p.V30I	c.G88A	Y	Y	0.5397	0.6881	0.1484	Germline	0.0378365	rs1126617	COSM4003824
	84	WES_Data1	SLC17A4	6	25776949	25776949	G	A	nonsynonymous SNV	p.A372T	c.G1114A	R	R	0.5758	0.725	0.1492	Germline	0.00354876	rs11754288	COSM5654058
	85	WES_Data1	SLC17A3	6	25850845	25850845	C	T	nonsynonymous SNV	p.G201R	c.G601A	Y	Y	0.4423	0.2556	-0.1867	Germline	0.000640932	rs56027330	COSM3761730
	86	WES_Data1	HIST1H1T	6	26108282	26108282	C	G	nonsynonymous SNV	p.V14L	c.G40C	S	S	0.4688	0.6832	0.2144	Germline	0.0248162	rs198844	COSM3761742
	87	WES_Data1	BTN3A3	6	26451969	26451969	T	C	nonsynonymous SNV	p.V152A	c.T455C	Y	Y	0.534	0.2727	-0.2613	Germline	1.58571e-05	rs114347679
	88	WES_Data1	MOG	6	29627222	29627222	C	A	nonsynonymous SNV	p.P72H	c.C215A	M	M	0.5541	0.2872	-0.2669	Germline	5.01051e-07	rs138169338	COSM228993
	89	WES_Data1	MOG	6	29634012	29634012	A	G	nonsynonymous SNV	p.I58V	c.A172G	R	R	0.4366	0.2097	-0.2269	Germline	0.000792428	rs3130253
	90	WES_Data1	HLA-A	6	29911154	29911154	C	A	nonsynonymous SNV	p.N151K	c.C453A	M	M	0.5818	0.307	-0.2748	Germline	0.000596029	rs1059509	COSM4160517
	91	WES_Data1	HLA-A	6	29911228	29911228	A	T	nonsynonymous SNV	p.E176V	c.A527T	W	W	0.541	0.2766	-0.2644	Germline	0.000851291	rs9256983	COSM3733674
	92	WES_Data1	HLA-A	6	29912280	29912280	T	C	nonsynonymous SNV	p.L300P	c.T899C	Y	Y	0.4845	0.2828	-0.2017	Germline	0.00113068	rs1136903	COSM4160531
	93	WES_Data1	TRIM31	6	30071330	30071330	C	T	nonsynonymous SNV	p.E421K	c.G1261A	Y	Y	0.5235	0.3264	-0.1971	Germline	2.53438e-05	rs1116221	COSM3761788
	94	WES_Data1	TRIM10	6	30126285	30126285	C	T	nonsynonymous SNV	p.R216K	c.G647A	Y	Y	0.4658	0.216	-0.2498	Germline	0.000247131	rs61737424
	95	WES_Data1	TRIM15	6	30131546	30131546	A	G	nonsynonymous SNV	p.I29V	c.A85G	R	R	0.5	0.25	-0.25	Germline	0.00145199	rs17194460	COSM3761795
	96	WES_Data1	TRIM15	6	30134987	30134987	C	T	nonsynonymous SNV	p.T139M	c.C416T	Y	Y	0.6364	0.3467	-0.2897	Germline	0.00197893	rs56866777
	97	WES_Data1	TRIM15	6	30139699	30139699	G	A	nonsynonymous SNV	p.S324N	c.G971A	R	R	0.48	0.2993	-0.1807	Germline	1.69355e-05	rs929156	COSM3761796
	98	WES_Data1	PPP1R18	6	30652781	30652781	C	T	nonsynonymous SNV	p.G339R	c.G1015A	Y	Y	0.404	0.7086	0.3046	Germline	1.57091e-06	rs9262143
	99	WES_Data1	DDR1	6	30862423	30862423	C	T	nonsynonymous SNV	p.P469L	c.C1406T	Y	Y	0.5352	0.7064	0.1712	Germline	0.0149104	rs1264319	COSM3761810
	100	WES_Data1	VARS2	6	30888161	30888161	T	C	nonsynonymous SNV	p.W309R	c.T925C	Y	Y	0.4878	0.2671	-0.2207	Germline	0.000557011	rs2249464	COSM5427258
	101	WES_Data1	VARS2	6	30893941	30893941	G	A	nonsynonymous SNV	p.R909Q	c.G2726A	R	R	0.4795	0.658	0.1785	Germline	0.000246081	rs4678
	102	WES_Data1	SFTA2	6	30899524	30899524	T	C	nonsynonymous SNV	p.N37S	c.A110G	Y	Y	0.4206	0.6812	0.2606	Germline	8.21314e-06	rs3131787	COSM3761815
	103	WES_Data1	DPCR1	6	30920124	30920124	G	A	nonsynonymous SNV	p.E1295K	c.G3883A	R	R	0.4167	0.6667	0.25	Germline	9.42465e-06	rs3132580	COSM5904824
	104	WES_Data1	MUC22	6	30993533	30993533	A	G	nonsynonymous SNV	p.R109G	c.A325G	R	R	0.4583	0.6284	0.1701	Germline	4.6334e-05	rs2523898	COSM4160615
	105	WES_Data1	MUC22	6	30993813	30993813	G	A	nonsynonymous SNV	p.S202N	c.G605A	R	R	0.485	0.293	-0.192	Germline	6.12701e-07	rs62399429
	106	WES_Data1	MUC22	6	30993866	30993866	A	T	nonsynonymous SNV	p.T220S	c.A658T	W	W	0.4397	0.3009	-0.1388	Germline	0.000246035	rs62399430	COSM5037910
	107	WES_Data1	MUC22	6	30993880	30993880	G	C	nonsynonymous SNV	p.E224D	c.G672C	S	S	0.4292	0.3018	-0.1274	Germline	0.00088286	rs62399431	COSM5037823
	108	WES_Data1	MUC22	6	30995178	30995178	C	T	nonsynonymous SNV	p.T657I	c.C1970T	Y	Y	0.4308	0.2697	-0.1611	Germline	9.27031e-06	rs111413526
	109	WES_Data1	MUC22	6	30995187	30995187	T	C	nonsynonymous SNV	p.I660T	c.T1979C	Y	Y	0.476	0.2831	-0.1929	Germline	3.19161e-07	rs62399443
	110	WES_Data1	MUC22	6	30995297	30995297	A	G	nonsynonymous SNV	p.I697V	c.A2089G	R	R	0.5259	0.317	-0.2089	Germline	2.21497e-07	rs62401664
	111	WES_Data1	MUC22	6	30995532	30995532	T	C	nonsynonymous SNV	p.M775T	c.T2324C	Y	Y	0.5225	0.3193	-0.2032	Germline	1.58671e-08	rs62401665
	112	WES_Data1	MUC22	6	30996132	30996132	C	T	nonsynonymous SNV	p.T975I	c.C2924T	Y	Y	0.4924	0.3115	-0.1809	Germline	1.13483e-07	rs12665700
	113	WES_Data1	MUC22	6	30996509	30996509	G	A	nonsynonymous SNV	p.E1101K	c.G3301A	R	R	0.4557	0.2708	-0.1849	Germline	6.48917e-08	rs35464561	COSM4601249
	114	WES_Data1	MUC22	6	30997334	30997334	A	G	nonsynonymous SNV	p.T1376A	c.A4126G	R	R	0.4014	0.2928	-0.1086	Germline	0.0012321	rs11756038
	115	WES_Data1	MUC22	6	30997352	30997352	A	G	nonsynonymous SNV	p.S1382G	c.A4144G	R	R	0.4631	0.3216	-0.1415	Germline	4.40224e-05	rs11756039	COSM4595389
	116	WES_Data1	MUC22	6	30997692	30997692	G	C	nonsynonymous SNV	p.S1495T	c.G4484C	S	S	0.4397	0.2833	-0.1564	Germline	2.78757e-05	rs9262549	COSM4594305
	117	WES_Data1	MUC22	6	31002452	31002452	A	G	nonsynonymous SNV	p.N1687D	c.A5059G	R	R	0.5446	0.3212	-0.2234	Germline	0.000174121	rs3869098
	118	WES_Data1	MUC22	6	31002527	31002527	A	G	nonsynonymous SNV	p.N1712D	c.A5134G	R	R	0.5287	0.2776	-0.2511	Germline	1.72769e-07	rs4248153
	119	WES_Data1	C6orf15	6	31079264	31079264	C	T	nonsynonymous SNV	p.G291D	c.G872A	Y	Y	0.4275	0.2585	-0.169	Germline	0.000718041	rs2233984
	120	WES_Data1	C6orf15	6	31079703	31079703	C	G	nonsynonymous SNV	p.A145P	c.G433C	S	S	0.475	0.3048	-0.1702	Germline	0.00156233	rs2233978	COSM4160639
	121	WES_Data1	C6orf15	6	31080016	31080016	C	G	nonsynonymous SNV	p.L40F	c.G120C	S	S	0.5062	0.6747	0.1685	Germline	0.000338228	rs2233974
	122	WES_Data1	CDSN	6	31084163	31084163	A	G	nonsynonymous SNV	p.L410S	c.T1229C	R	R	0.4918	0.254	-0.2378	Germline	1.56483e-05	rs3132554	COSM4006310
	123	WES_Data1	CDSN	6	31084170	31084170	A	C	nonsynonymous SNV	p.S408A	c.T1222G	M	M	0.5041	0.2541	-0.25	Germline	7.11247e-06	rs1042127	COSM4999218
	124	WES_Data1	CDSN	6	31088145	31088145	T	A	nonsynonymous SNV	p.M18L	c.A52T	W	W	0.4762	0.7167	0.2405	Germline	0.0122	rs3095318
	125	WES_Data1	PSORS1C2	6	31105891	31105891	A	G	nonsynonymous SNV	p.L83P	c.T248C	R	R	0.3548	0.6327	0.2779	Germline	0.0138459	rs2233952	COSM4160644
	126	WES_Data1	CCHCR1	6	31110391	31110391	G	C	nonsynonymous SNV	p.S829C	c.C2486G	S	S	0.4576	0.6353	0.1777	Germline	0.0260187	rs1576	COSM3761820
	127	WES_Data1	CCHCR1	6	31112737	31112737	C	A	nonsynonymous SNV	p.G628C	c.G1882T	M	M	0.4754	0.6573	0.1819	Germline	0.0117685	rs130079
	128	WES_Data1	CCHCR1	6	31118511	31118511	T	G	nonsynonymous SNV	p.E328D	c.A984C	K	K	0.5	0.2866	-0.2134	Germline	0.00096435	rs130067	COSM5001437
	129	WES_Data1	CCHCR1	6	31122482	31122482	G	A	nonsynonymous SNV	p.R162W	c.C484T	R	R	0.4531	0.7018	0.2487	Germline	0.00097927	rs130076	COSM3761833
	130	WES_Data1	CCHCR1	6	31122500	31122500	G	A	nonsynonymous SNV	p.R156W	c.C466T	R	R	0.371	0.7429	0.3719	Germline	2.20904e-06	rs130065	COSM3761834
	131	WES_Data1	TCF19	6	31129310	31129310	C	T	nonsynonymous SNV	p.P109S	c.C325T	Y	Y	0.3654	0.6299	0.2645	Germline	2.42288e-05	rs7750641
	132	WES_Data1	HLA-C	6	31237862	31237862	T	C	nonsynonymous SNV	p.E299G	c.A896G	Y	Y	0.3944	0.6444	0.25	Germline	0.0013097	rs9264621	COSM1285385
	133	WES_Data1	HLA-C	6	31238930	31238930	A	C	nonsynonymous SNV	p.L180R	c.T539G	M	M	0.2059	0.4343	0.2284	Germline	0.00165564	rs79636386	COSM4160734
	134	WES_Data1	MICA	6	31379043	31379043	A	G	nonsynonymous SNV	p.M174V	c.A520G	R	R	0.4481	0.6723	0.2242	Germline	8.83904e-06	rs41560824
	135	WES_Data1	MICA	6	31379990	31379990	C	G	nonsynonymous SNV	p.P294A	c.C880G	S	S	0.3556	0.6949	0.3393	Germline	0.000545538	rs41553616
	136	WES_Data1	MICA	6	31380198	31380198	C	T	nonsynonymous SNV	p.P330L	c.C989T	Y	Y	0.4912	0.6747	0.1835	Germline	0.0227764	rs61738275	COSM3761882
	137	WES_Data1	MICA	6	31382893	31382893	A	G	nonsynonymous SNV	p.T377A	c.A1129G	R	R	0.4133	0.5785	0.1652	Germline	0.00123056	rs41545814
	138	WES_Data1	MICA	6	31382911	31382911	A	G	nonsynonymous SNV	p.T383A	c.A1147G	R	R	0.4129	0.5395	0.1266	Germline	0.00986481	rs1882
	139	WES_Data1	MICB	6	31473561	31473561	A	G	nonsynonymous SNV	p.K48E	c.A142G	R	R	0.4768	0.2703	-0.2065	Germline	1.99581e-05	rs1065075	COSM3761883
	140	WES_Data1	MICB	6	31474000	31474000	G	A	nonsynonymous SNV	p.D104N	c.G310A	R	R	0.5234	0.2903	-0.2331	Germline	5.28291e-05	rs1051788	COSM3761884
	141	WES_Data1	MCCD1	6	31496915	31496915	G	A	nonsynonymous SNV	p.E42K	c.G124A	R	R	0.4179	0.6117	0.1938	Germline	0.0101678	rs2259435	COSM4160830
	142	WES_Data1	MCCD1	6	31496949	31496949	C	T	nonsynonymous SNV	p.T53M	c.C158T	Y	Y	0.3833	0.642	0.2587	Germline	0.00197463	rs78957773	COSM4160832
	143	WES_Data1	BAG6	6	31610686	31610686	A	G	nonsynonymous SNV	p.S619P	c.T1855C	R	R	0.4564	0.6336	0.1772	Germline	0.000361895	rs1052486	COSM3774230
	144	WES_Data1	C6orf47	6	31627449	31627449	C	G	nonsynonymous SNV	p.K92N	c.G276C	S	S	0.4255	0.2329	-0.1926	Germline	0.00137221	rs2242655	COSM4003944
	145	WES_Data1	SAPCD1	6	31731881	31731881	C	T	nonsynonymous SNV	p.P99L	c.C296T	Y	Y	0.4713	0.2065	-0.2648	Germline	1.90207e-05	rs6905572	COSM4003949
	146	WES_Data1	SLC44A4	6	31838441	31838441	T	C	nonsynonymous SNV	p.M284V	c.A850G	Y	Y	0.4074	0.6471	0.2397	Germline	0.000997494	rs644827
	147	WES_Data1	CFB	6	31914180	31914180	G	A	nonsynonymous SNV	p.R32Q	c.G95A	R	R	0.5229	0.6542	0.1313	Germline	0.0065046	rs641153	COSM4984899
	148	WES_Data1	SKIV2L	6	31928306	31928306	A	G	nonsynonymous SNV	p.Q151R	c.A452G	R	R	0.4624	0.6572	0.1948	Germline	3.28186e-05	rs438999	COSM4155178
	149	WES_Data1	SKIV2L	6	31936679	31936679	C	T	nonsynonymous SNV	p.A1071V	c.C3212T	Y	Y	0.3969	0.6884	0.2915	Germline	1.40749e-07	rs449643	COSM3761898
	150	WES_Data1	TNXB	6	32023903	32023903	G	C	nonsynonymous SNV	p.P2731R	c.C8192G	S	S	0.303	0.7143	0.4113	Germline	0.000171791	rs440160
	151	WES_Data1	TNXB	6	32041621	32041621	G	A	nonsynonymous SNV	p.T1495I	c.C4484T	R	R	0.4815	0.641	0.1595	Germline	0.018482	rs6910390
	152	WES_Data1	NOTCH4	6	32190390	32190390	T	G	nonsynonymous SNV	p.K117Q	c.A349C	K	K	0.4762	0.6387	0.1625	Germline	0.0154151	rs915894	COSM4417696
	153	WES_Data1	C6orf10	6	32261014	32261014	C	A	nonsynonymous SNV	p.G479V	c.G1436T	M	M	0.4524	0.6981	0.2457	Germline	0.0135147	rs7751028
	154	WES_Data1	C6orf10	6	32261158	32261158	G	C	nonsynonymous SNV	p.T431S	c.C1292G	S	S	0.3788	0.5846	0.2058	Germline	0.00493989	rs114543649
	155	WES_Data1	C6orf10	6	32261291	32261291	G	C	nonsynonymous SNV	p.Q387E	c.C1159G	S	S	0.4135	0.6502	0.2367	Germline	1.55662e-05	rs61995678	COSM5001452
	156	WES_Data1	C6orf10	6	32261507	32261507	T	C	nonsynonymous SNV	p.I315V	c.A943G	Y	Y	0.4972	0.6698	0.1726	Germline	0.00039123	rs3749966	COSM4003970
	157	WES_Data1	C6orf10	6	32261653	32261653	A	C	nonsynonymous SNV	p.L266W	c.T797G	M	M	0.4156	0.7109	0.2953	Germline	2.78574e-05	rs4947338
	158	WES_Data1	BTNL2	6	32362703	32362703	G	T	nonsynonymous SNV	p.P393Q	c.C1178A	K	K	0.4932	0.3119	-0.1813	Germline	0.000159686	rs41521946	COSM5907391
	159	WES_Data1	BTNL2	6	32362741	32362741	C	T	nonsynonymous SNV	p.M380I	c.G1140A	Y	Y	0.5	0.2879	-0.2121	Germline	4.35824e-05	rs28362677
	160	WES_Data1	BTNL2	6	32362745	32362745	G	A	nonsynonymous SNV	p.P379L	c.C1136T	R	R	0.4874	0.2782	-0.2092	Germline	7.49993e-05	rs28362678
	161	WES_Data1	HLA-DRB1	6	32548026	32548026	G	C	nonsynonymous SNV	p.T262R	c.C785G	G	S	0.0952	0.32	0.2248	Somatic	0.00815677	rs9269744	COSM3830216
	162	WES_Data1	HLA-DRB1	6	32549452	32549452	C	G	nonsynonymous SNV	p.Q178H	c.G534C	S	S	0.5128	0.7288	0.216	Germline	0.0247693	rs77637983	COSM451268
	163	WES_Data1	HLA-DRB1	6	32552075	32552075	A	G	nonsynonymous SNV	p.Y61H	c.T181C	G	G	0.8163	0.9194	0.1031	Germline	0.00979048	rs1064664	COSM3761941
	164	WES_Data1	HLA-DQA1	6	32609173	32609173	C	G	nonsynonymous SNV	p.Q57E	c.C169G	S	S	0.5109	0.3129	-0.198	Germline	0.00180185	rs10093	COSM4160990
	165	WES_Data1	HLA-DQA1	6	32610461	32610461	A	G	nonsynonymous SNV	p.M230V	c.A688G	R	R	0.5128	0.3063	-0.2065	Germline	0.00168907	rs9260	COSM4161007
	166	WES_Data1	HLA-DQB1	6	32629920	32629920	C	T	nonsynonymous SNV	p.R162Q	c.G485A	Y	Y	0.597	0.7287	0.1317	Germline	0.0437195	rs41544112
	167	WES_Data1	HLA-DQB1	6	32629963	32629963	C	T	nonsynonymous SNV	p.V148I	c.G442A	Y	Y	0.4333	0.2162	-0.2171	Germline	0.00277474	rs1049100	COSM5654067
	168	WES_Data1	HLA-DQB1	6	32632601	32632601	G	C	nonsynonymous SNV	p.A118G	c.C353G	C	C	0.8108	0.944	0.1332	Germline	0.00377609	rs9274380
	169	WES_Data1	HLA-DQB1	6	32632650	32632650	C	T	nonsynonymous SNV	p.G102R	c.G304A	T	T	0.8293	0.9633	0.134	Germline	0.0018654	rs1130386	COSM3733869
	170	WES_Data1	HLA-DQB1	6	32634302	32634302	A	G	nonsynonymous SNV	p.L28P	c.T83C	R	R	0.5	0.2018	-0.2982	Germline	5.0959e-05	rs1049062	COSM3927834
	171	WES_Data1	HLA-DQB1	6	32634313	32634313	C	G	nonsynonymous SNV	p.M24I	c.G72C	S	S	0.4706	0.2137	-0.2569	Germline	0.000201206	rs1049059	COSM4161025
	172	WES_Data1	PSMB8	6	32811629	32811629	G	T	nonsynonymous SNV	p.Q49K	c.C145A	K	K	0.3889	0.6406	0.2517	Germline	0.00049817	rs2071543	COSM4161043
	173	WES_Data1	HLA-DMB	6	32904981	32904981	G	A	nonsynonymous SNV	p.T197I	c.C590T	R	R	0.4157	0.6667	0.251	Germline	9.20248e-05	rs1042337
	174	WES_Data1	HLA-DPB1	6	33048542	33048542	C	T	nonsynonymous SNV	p.A65V	c.C194T	Y	Y	0.458	0.6497	0.1917	Germline	0.000444246	rs1042121	COSM4161051
	175	WES_Data1	HLA-DPB1	6	33048599	33048599	C	A	nonsynonymous SNV	p.A84D	c.C251A	M	M	0.4182	0.6473	0.2291	Germline	7.26682e-05	rs707958	COSM4161052
	176	WES_Data1	HLA-DPB1	6	33048602	33048602	C	A	nonsynonymous SNV	p.A85E	c.C254A	M	M	0.4091	0.6482	0.2391	Germline	4.09322e-05	rs1042131	COSM4407291
	177	WES_Data1	HLA-DPB1	6	33048640	33048640	A	G	nonsynonymous SNV	p.K98E	c.A292G	R	R	0.3939	0.6474	0.2535	Germline	4.32917e-05	rs1042140	COSM3761981
	178	WES_Data1	TAPBP	6	33272855	33272855	G	C	nonsynonymous SNV	p.T173R	c.C518G	S	S	0.4375	0.2776	-0.1599	Germline	0.000685902	rs2071888	COSM1180608
	179	WES_Data1	SMIM29	6	34214348	34214348	C	T	nonsynonymous SNV	p.M121I	c.G363A	Y	Y	0.5	0.2788	-0.2212	Germline	0.000226163	rs34410712	COSM4161092
	180	WES_Data1	PNPLA1	6	36274153	36274153	C	T	nonsynonymous SNV	p.T404M	c.C1211T	Y	Y	0.4369	0.7103	0.2734	Germline	1.33556e-05	rs12197079	COSM3762011
	181	WES_Data1	FGD2	6	36976637	36976637	G	C	nonsynonymous SNV	p.Q32H	c.G96C	S	S	0.475	0.2851	-0.1899	Germline	0.000379657	rs831510	COSM1131882
	182	WES_Data1	PIM1	6	37138220	37138220	C	G	nonsynonymous SNV	p.H48D	c.C142G	S	S	0.5345	0.7037	0.1692	Germline	0.0314358	rs262936
	183	WES_Data1	DNAH8	6	38729511	38729511	T	C	nonsynonymous SNV	p.Y517H	c.T1549C	Y	Y	0.4839	0.7407	0.2568	Germline	0.0414555	rs61748600	COSM5618292
	184	WES_Data1	DNAH8	6	38951998	38951998	C	T	nonsynonymous SNV	p.T4323M	c.C12968T	Y	Y	0.4762	0.6957	0.2195	Germline	0.00497996	rs1537232	COSM3762049
	185	WES_Data1	MOCS1	6	39881102	39881102	A	T	nonsynonymous SNV	p.L239H	c.T716A	W	W	0.4638	0.2561	-0.2077	Germline	0.00177586	rs7762875
	186	WES_Data1	APOBEC2	6	41029342	41029342	T	C	nonsynonymous SNV	p.I136T	c.T407C	Y	Y	0.4916	0.6741	0.1825	Germline	8.42732e-05	rs2076472	COSM3762064
	187	WES_Data1	TREML2	6	41162518	41162518	T	C	nonsynonymous SNV	p.S144G	c.A430G	Y	Y	0.5159	0.6912	0.1753	Germline	0.00043169	rs3747742	COSM5480739
	188	WES_Data1	BYSL	6	41900406	41900406	C	T	nonsynonymous SNV	p.P426S	c.C1276T	Y	Y	0.3427	0.6651	0.3224	Germline	1.59148e-09	rs3828855	COSM4004042
	189	WES_Data1	CCND3	6	41903782	41903782	A	C	nonsynonymous SNV	p.S187A	c.T559G	M	M	0.3556	0.5395	0.1839	Germline	0.0378808	rs1051130	COSM451455
	190	WES_Data1	C6orf132	6	42074106	42074106	A	G	nonsynonymous SNV	p.L515P	c.T1544C	R	R	0.4217	0.6591	0.2374	Germline	0.000517457	rs9394866	COSM4161187
	191	WES_Data1	TCTE1	6	44255387	44255387	C	T	nonsynonymous SNV	p.R59H	c.G176A	Y	Y	0.4526	0.2862	-0.1664	Germline	0.000135316	rs61742784	COSM4417270
	192	WES_Data1	AARS2	6	44270870	44270870	C	T	nonsynonymous SNV	p.V730M	c.G2188A	Y	Y	0.5702	0.3063	-0.2639	Germline	1.06372e-05	rs35623954	COSM4999552
	193	WES_Data1	CLIC5	6	45916999	45916999	G	T	nonsynonymous SNV	p.P257H	c.C770A	K	K	0.534	0.3152	-0.2188	Germline	0.000308454	rs35822882
	194	WES_Data1	ENPP4	6	46107752	46107752	C	G	nonsynonymous SNV	p.H144Q	c.C432G	S	S	0.4136	0.6654	0.2518	Germline	6.03032e-08	rs7451713	COSM5003617
	195	WES_Data1	ENPP5	6	46135489	46135489	T	C	nonsynonymous SNV	p.I77V	c.A229G	Y	Y	0.3942	0.652	0.2578	Germline	8.58004e-07	rs6926570	COSM4161254
	196	WES_Data1	ENPP5	6	46135984	46135984	G	T	nonsynonymous SNV	p.L6I	c.C16A	K	K	0.3699	0.7186	0.3487	Germline	4.07307e-07	rs3806995
	197	WES_Data1	TDRD6	6	46657057	46657057	A	G	nonsynonymous SNV	p.T398A	c.A1192G	R	R	0.4591	0.6653	0.2062	Germline	3.00268e-05	rs3799277
	198	WES_Data1	ADGRF2	6	47646842	47646842	A	G	nonsynonymous SNV	p.Q80R	c.A239G	R	R	0.5429	0.7302	0.1873	Germline	0.00647387	rs6907125
	199	WES_Data1	ADGRF2	6	47649265	47649265	T	A	nonsynonymous SNV	p.L256M	c.T766A	W	W	0.5251	0.3409	-0.1842	Germline	5.15104e-05	rs17541107	COSM5001985
	200	WES_Data1	ADGRF2	6	47649574	47649574	A	G	nonsynonymous SNV	p.K359E	c.A1075G	R	R	0.3493	0.5928	0.2435	Germline	3.67901e-06	rs10807372	COSM5003950
	201	WES_Data1	ADGRF2	6	47649694	47649694	A	G	nonsynonymous SNV	p.I399V	c.A1195G	R	R	0.4318	0.6374	0.2056	Germline	0.000228679	rs9381594	COSM4161262
	202	WES_Data1	DEFB133	6	49913927	49913927	C	T	nonsynonymous SNV	p.V25M	c.G73A	Y	Y	0.3906	0.6161	0.2255	Germline	0.00314819	rs17664085
	203	WES_Data1	PKHD1	6	51483961	51483961	T	C	nonsynonymous SNV	p.Q4048R	c.A12143G	Y	Y	0.5545	0.3212	-0.2333	Germline	5.97737e-05	rs9381994	COSM1445058
	204	WES_Data1	PKHD1	6	51491884	51491884	T	C	nonsynonymous SNV	p.Q3899R	c.A11696G	Y	Y	0.4636	0.2722	-0.1914	Germline	0.000724455	rs4715227	COSM4004068
	205	WES_Data1	IL17F	6	52101844	52101844	T	C	nonsynonymous SNV	p.E126G	c.A377G	Y	Y	0.5276	0.3367	-0.1909	Germline	0.000489917	rs2397084	COSM1579556
	206	WES_Data1	KLHL31	6	53519707	53519707	C	A	nonsynonymous SNV	p.A122S	c.G364T	M	M	0.5038	0.2973	-0.2065	Germline	5.23334e-05	rs116548230
	207	WES_Data1	GFRAL	6	55196587	55196587	C	T	nonsynonymous SNV	p.R33C	c.C97T	Y	T	0.3333	0.7647	0.4314	LOH	0.00186971	rs12199003	COSM3762142
	208	WES_Data1	DST	6	56463410	56463410	T	C	nonsynonymous SNV	p.Q1308R	c.A3923G	Y	Y	0.6522	0.25	-0.4022	Germline	0.00200947	rs4712138	COSM4004095
	209	WES_Data1	DST	6	56482801	56482801	C	G	nonsynonymous SNV	p.V2011L	c.G6031C	S	S	0.4719	0.2733	-0.1986	Germline	0.00153129	rs6459166	COSM4004105
	210	WES_Data1	EYS	6	65300250	65300250	C	G	nonsynonymous SNV	p.W1837S	c.G5510C	S	S	0.5071	0.2857	-0.2214	Germline	2.32641e-05	rs199689193
	211	WES_Data1	EYS	6	65301211	65301211	T	C	nonsynonymous SNV	p.S1517G	c.A4549G	Y	Y	0.3879	0.5912	0.2033	Germline	0.000648201	rs62415826	COSM4161305
	212	WES_Data1	EYS	6	65301217	65301217	G	A	nonsynonymous SNV	p.R1515W	c.C4543T	R	R	0.4	0.5779	0.1779	Germline	0.00280147	rs62415827	COSM4161306
	213	WES_Data1	EYS	6	65301408	65301408	A	G	nonsynonymous SNV	p.I1451T	c.T4352C	R	R	0.4016	0.6382	0.2366	Germline	2.26841e-05	rs62415828
	214	WES_Data1	EYS	6	65301504	65301504	A	G	nonsynonymous SNV	p.L1419S	c.T4256C	R	R	0.4514	0.6098	0.1584	Germline	0.00170428	rs624851	COSM5000841
	215	WES_Data1	EYS	6	65301679	65301679	T	C	nonsynonymous SNV	p.I1361V	c.A4081G	Y	Y	0.4286	0.6141	0.1855	Germline	0.00137566	rs17403955
	216	WES_Data1	EYS	6	65301787	65301787	G	C	nonsynonymous SNV	p.Q1325E	c.C3973G	S	S	0.4112	0.615	0.2038	Germline	0.000423452	rs12663622	COSM150116
	217	WES_Data1	EYS	6	66005857	66005857	T	A	nonsynonymous SNV	p.E641V	c.A1922T	W	W	0.4638	0.6455	0.1817	Germline	0.012663	rs17411795	COSM1137554
	218	WES_Data1	LOC441155	6	66013183	66013183	G	A	nonsynonymous SNV	p.V257I	c.G769A	R	A	0.5556	0.7778	0.2222	LOH	0.0318951	rs546110448	COSN15639711
	219	WES_Data1	COL12A1	6	75848181	75848181	A	G	nonsynonymous SNV	p.I574T	c.T1721C	R	R	0.405	0.6446	0.2396	Germline	1.18269e-05	rs240736	COSM4161350
	220	WES_Data1	SENP6	6	76344431	76344431	C	T	nonsynonymous SNV	p.T121M	c.C362T	Y	Y	0.5306	0.6909	0.1603	Germline	0.0394235	rs17414086
	221	WES_Data1	ZNF292	6	87967636	87967636	A	G	nonsynonymous SNV	p.N1430S	c.A4289G	R	R	0.4541	0.6304	0.1763	Germline	6.35918e-05	rs6941356
	222	WES_Data1	ZNF292	6	87968565	87968565	A	G	nonsynonymous SNV	p.I1740V	c.A5218G	R	R	0.3621	0.6408	0.2787	Germline	0.000573508	rs9362415	COSM3762207
	223	WES_Data1	GJB7	6	87994015	87994015	A	G	nonsynonymous SNV	p.F206L	c.T616C	R	R	0.434	0.6421	0.2081	Germline	0.000417885	rs6934603	COSM3762211
	224	WES_Data1	GJB7	6	87994572	87994572	G	A	nonsynonymous SNV	p.T20I	c.C59T	R	R	0.4563	0.5882	0.1319	Germline	0.029116	rs4707358	COSM3762212
	225	WES_Data1	CFAP206	6	88125542	88125542	G	A	nonsynonymous SNV	p.R141H	c.G422A	R	R	0.4464	0.6538	0.2074	Germline	0.00903341	rs61731441
	226	WES_Data1	CFAP206	6	88126423	88126423	G	C	nonsynonymous SNV	p.G170A	c.G509C	S	S	0.4627	0.63	0.1673	Germline	0.0240235	rs16879281	COSM5618291
	227	WES_Data1	ANKRD6	6	90340446	90340446	C	T	nonsynonymous SNV	p.P572L	c.C1715T	Y	Y	0.5463	0.6501	0.1038	Germline	0.00852722	rs61739327	COSM4004148
	228	WES_Data1	MDN1	6	90372574	90372574	A	C	nonsynonymous SNV	p.D4783E	c.T14349G	M	M	0.4356	0.6649	0.2293	Germline	0.000125342	rs36040566	COSM4004151
	229	WES_Data1	MDN1	6	90374283	90374283	A	G	nonsynonymous SNV	p.I4720T	c.T14159C	R	R	0.5082	0.295	-0.2132	Germline	0.000107443	rs16882046
	230	WES_Data1	MDN1	6	90384274	90384274	T	C	nonsynonymous SNV	p.R4266G	c.A12796G	Y	Y	0.5048	0.292	-0.2128	Germline	0.000597742	rs41273327
	231	WES_Data1	MDN1	6	90397132	90397132	G	C	nonsynonymous SNV	p.A3794G	c.C11381G	S	S	0.4476	0.6606	0.213	Germline	0.000439817	rs34766278
	232	WES_Data1	SIM1	6	100868721	100868721	G	A	nonsynonymous SNV	p.A371V	c.C1112T	R	R	0.3095	0.5333	0.2238	Germline	0.0202438	rs3734355	COSM150145
	233	WES_Data1	SIM1	6	100868779	100868779	G	T	nonsynonymous SNV	p.P352T	c.C1054A	K	K	0.303	0.5333	0.2303	Germline	0.0268141	rs3734354	COSM150146
	234	WES_Data1	ASCC3	6	101296389	101296389	G	A	nonsynonymous SNV	p.L146F	c.C436T	R	R	0.4206	0.6393	0.2187	Germline	0.000113469	rs9390698	COSM150148
	235	WES_Data1	GRIK2	6	102516260	102516260	G	A	nonsynonymous SNV	p.M867I	c.G2601A	R	R	0.4554	0.6784	0.223	Germline	0.000156469	rs2235076
	236	WES_Data1	CRYBG1	6	106999822	106999822	G	A	nonsynonymous SNV	p.C1395Y	c.G4184A	R	R	0.3793	0.6667	0.2874	Germline	0.000260927	rs2297970	COSM3761411
	237	WES_Data1	SCML4	6	108068003	108068003	C	T	nonsynonymous SNV	p.R68Q	c.G203A	Y	Y	0.4466	0.5938	0.1472	Germline	0.0135605	rs6934505	COSM4416709
	238	WES_Data1	C6orf183	6	109583186	109583186	A	G	nonsynonymous SNV	p.D363G	c.A1088G	R	R	0.5205	0.6857	0.1652	Germline	0.019188	rs1040285
	239	WES_Data1	REV3L	6	111628626	111628626	C	T	nonsynonymous SNV	p.V3064I	c.G9190A	Y	Y	0.5909	0.2857	-0.3052	Germline	4.5748e-06	rs3204953
	240	WES_Data1	WISP3	6	112382313	112382313	G	T	nonsynonymous SNV	p.Q74H	c.G222T	K	K	0.4342	0.6783	0.2441	Germline	0.000693981	rs1230345	COSM5654082
	241	WES_Data1	LAMA4	6	112457383	112457383	G	C	nonsynonymous SNV	p.P1119R	c.C3356G	S	S	0.3636	0.6574	0.2938	Germline	6.73092e-05	rs1050349	COSM4998881
	242	WES_Data1	RFPL4B	6	112671611	112671611	G	A	nonsynonymous SNV	p.G234D	c.G701A	R	R	0.4286	0.5986	0.17	Germline	0.0171602	rs11153361	COSM3723349
	243	WES_Data1	ROS1	6	117725448	117725448	T	G	nonsynonymous SNV	p.T145P	c.A433C	K	K	0.4624	0.6325	0.1701	Germline	0.00585874	rs1998206	COSM4003669
	244	WES_Data1	SLC35F1	6	118606498	118606498	C	A	stopgain	p.Y333X	c.C999A	C	M	0.0349	0.2426	0.2077	Somatic	6.69915e-06	.
	245	WES_Data1	TBC1D32	6	121577370	121577370	T	C	nonsynonymous SNV	p.I599V	c.A1795G	Y	Y	0.4211	0.7119	0.2908	Germline	0.00415671	rs7745023	COSM1132045
	246	WES_Data1	SMPDL3A	6	123122464	123122464	C	T	nonsynonymous SNV	p.P30S	c.C88T	Y	Y	0.4433	0.2556	-0.1877	Germline	0.00121523	rs28385609	COSM3761471
	247	WES_Data1	NCOA7	6	126210395	126210395	T	G	nonsynonymous SNV	p.S284A	c.T850G	K	K	0.4606	0.6327	0.1721	Germline	0.000414644	rs6919947	COSM4003675
	248	WES_Data1	HINT3	6	126278230	126278230	G	C	nonsynonymous SNV	p.G36A	c.G107C	S	S	0.5	0.2339	-0.2661	Germline	1.58738e-06	rs2295005	COSM450440
	249	WES_Data1	KIAA0408	6	127771452	127771452	T	G	nonsynonymous SNV	p.S61R	c.A181C	K	K	0.4054	0.6491	0.2437	Germline	0.0173482	rs3734447	COSM4407200
	250	WES_Data1	THEMIS	6	128040839	128040839	T	C	nonsynonymous SNV	p.I630V	c.A1888G	Y	Y	0.488	0.6646	0.1766	Germline	0.00193386	rs675531	COSM150180
	251	WES_Data1	VNN1	6	133035098	133035098	G	A	nonsynonymous SNV	p.T26I	c.C77T	R	R	0.4038	0.697	0.2932	Germline	0.000472532	rs2294757	COSM5003494
	252	WES_Data1	BCLAF1	6	136599393	136599393	G	C	nonsynonymous SNV	p.S207C	c.C620G	S	S	0.4901	0.3505	-0.1396	Germline	0.000104285	rs6940018	COSM4590961
	253	WES_Data1	IL20RA	6	137323213	137323213	G	A	nonsynonymous SNV	p.L271F	c.C811T	R	R	0.5	0.2448	-0.2552	Germline	3.05496e-06	rs1342642	COSM3761495
	254	WES_Data1	PERP	6	138413333	138413333	G	C	nonsynonymous SNV	p.P143R	c.C428G	S	S	0.4054	0.6612	0.2558	Germline	1.51493e-05	rs648802
	255	WES_Data1	NHSL1	6	138753279	138753279	G	A	nonsynonymous SNV	p.R739C	c.C2215T	R	R	0.4851	0.6069	0.1218	Germline	0.0391883	rs763185214
	256	WES_Data1	HECA	6	139488050	139488050	G	A	nonsynonymous SNV	p.A301T	c.G901A	R	R	0.4892	0.6641	0.1749	Germline	0.000158669	.
	257	WES_Data1	STXBP5	6	147635413	147635413	A	G	nonsynonymous SNV	p.N436S	c.A1307G	R	R	0.3922	0.618	0.2258	Germline	0.00807016	rs1039084	COSM4003723
	258	WES_Data1	SASH1	6	148865257	148865257	A	G	nonsynonymous SNV	p.Q645R	c.A1934G	R	R	0.4867	0.6494	0.1627	Germline	0.00118663	rs208696	COSM4160273
	259	WES_Data1	SUMO4	6	149721690	149721690	G	A	nonsynonymous SNV	p.V55M	c.G163A	R	R	0.4444	0.2698	-0.1746	Germline	0.000611529	rs237025
	260	WES_Data1	PCMT1	6	150114745	150114745	G	A	nonsynonymous SNV	p.V143I	c.G427A	R	R	0.6393	0.3649	-0.2744	Germline	0.00127715	rs4816	COSM3761538
	261	WES_Data1	SYNE1	6	152443744	152443744	G	T	nonsynonymous SNV	p.L919M	c.C2755A	K	K	0.4961	0.3348	-0.1613	Germline	0.00203344	rs2295190	COSM3761557
	262	WES_Data1	SYNE1	6	152652034	152652034	A	T	nonsynonymous SNV	p.S4525T	c.T13573A	W	W	0.4886	0.6597	0.1711	Germline	0.00503745	rs6911096	COSM5010199
	263	WES_Data1	FBXO5	6	153296541	153296541	G	C	nonsynonymous SNV	p.Q61E	c.C181G	S	S	0.4848	0.2917	-0.1931	Germline	0.000171664	rs2073260	COSM3761597
	264	WES_Data1	TIAM2	6	155451352	155451352	G	A	nonsynonymous SNV	p.R332H	c.G995A	R	R	0.4922	0.311	-0.1812	Germline	3.0186e-05	rs931312	COSM5617632
	265	WES_Data1	RSPH3	6	159398700	159398700	C	T	nonsynonymous SNV	p.G422D	c.G1265A	Y	Y	0.4586	0.5887	0.1301	Germline	0.0101543	rs3756987	COSM150206
	266	WES_Data1	RSPH3	6	159407446	159407446	C	T	nonsynonymous SNV	p.R213Q	c.G638A	Y	Y	0.4783	0.6542	0.1759	Germline	0.0156188	rs34582178	COSM150209
	267	WES_Data1	RSPH3	6	159414899	159414899	T	C	nonsynonymous SNV	p.N201S	c.A602G	Y	Y	0.5109	0.685	0.1741	Germline	0.00679952	rs16889320	COSM150210
	268	WES_Data1	FNDC1	6	159621087	159621087	C	T	nonsynonymous SNV	p.P122S	c.C364T	Y	Y	0.4906	0.6667	0.1761	Germline	0.0263751	rs62432291
	269	WES_Data1	FNDC1	6	159654551	159654551	C	G	nonsynonymous SNV	p.Q1003E	c.C3007G	S	S	0.5217	0.3134	-0.2083	Germline	9.46079e-05	rs370434	COSM3761627
	270	WES_Data1	FNDC1	6	159655326	159655326	T	C	nonsynonymous SNV	p.L1261P	c.T3782C	Y	Y	0.4886	0.2778	-0.2108	Germline	0.000977817	rs3003174	COSM3749959
	271	WES_Data1	SLC22A1	6	160560845	160560845	A	G	nonsynonymous SNV	p.M408V	c.A1222G	R	R	0.413	0.6905	0.2775	Germline	0.00194803	rs628031
	272	WES_Data1	PLG	6	161152905	161152905	C	T	nonsynonymous SNV	p.R523W	c.C1567T	Y	Y	0.4677	0.6739	0.2062	Germline	0.000242671	rs4252129
	273	WES_Data1	PRKN	6	161807855	161807855	C	G	nonsynonymous SNV	p.V231L	c.G691C	S	S	0.5242	0.305	-0.2192	Germline	0.000226251	rs1801582	COSM4985458
	274	WES_Data1	RPS6KA2	6	167271716	167271716	T	C	nonsynonymous SNV	p.E32G	c.A95G	Y	Y	0.4454	0.6898	0.2444	Germline	1.86352e-05	rs9347162
	275	WES_Data1	ERMARD	6	170176467	170176467	A	G	nonsynonymous SNV	p.K520E	c.A1558G	R	R	0.4262	0.6087	0.1825	Germline	0.00126396	rs4716345	COSM4407409
	276	WES_Data1	ERMARD	6	170176648	170176648	A	G	nonsynonymous SNV	p.S414G	c.A1240G	R	R	0.4059	0.5629	0.157	Germline	0.00894445	rs4716346	COSM3761679
	277	WES_Data1	FAM20C	7	299863	299863	C	T	nonsynonymous SNV	p.R558W	c.C1672T	Y	Y	0.4592	0.6471	0.1879	Germline	0.0220363	rs62644536
	278	WES_Data1	PRKAR1B	7	635884	635884	G	T	nonsynonymous SNV	p.L203M	c.C607A	K	K	0.45	0.6301	0.1801	Germline	0.011086	.
	279	WES_Data1	DNAAF5	7	810219	810219	T	C	nonsynonymous SNV	p.V632A	c.T1895C	Y	C	0.4943	0.7547	0.2604	LOH	0.00184102	rs4720951	COSM4162472
	280	WES_Data1	GPR146	7	1097183	1097183	G	A	nonsynonymous SNV	p.G11E	c.G32A	R	R	0.4306	0.6304	0.1998	Germline	0.026525	rs11761941	COSM3762327
	281	WES_Data1	GPER1	7	1131411	1131411	C	T	nonsynonymous SNV	p.P16L	c.C47T	Y	Y	0.4694	0.6306	0.1612	Germline	0.00708495	rs11544331	COSM3762333
	282	WES_Data1	MICALL2	7	1488265	1488265	G	A	nonsynonymous SNV	p.R109C	c.C325T	R	R	0.5055	0.2037	-0.3018	Germline	0.00023834	rs149008569
	283	WES_Data1	IQCE	7	2644519	2644519	C	T	nonsynonymous SNV	p.A481V	c.C1442T	Y	Y	0.5135	0.2455	-0.268	Germline	9.63902e-06	rs2293404	COSM452909
	284	WES_Data1	IQCE	7	2649704	2649704	T	G	nonsynonymous SNV	p.L601V	c.T1801G	K	K	0.5684	0.28	-0.2884	Germline	0.000136913	rs3735109	COSM3762605
	285	WES_Data1	GNA12	7	2802522	2802522	T	C	startloss	p.A2_M73del	c.A1G	Y	Y	0.4	0.6222	0.2222	Germline	0.0177043	rs798488	COSN9974883
	286	WES_Data1	GNA12	7	2834633	2834633	G	C	nonsynonymous SNV	p.P152A	c.C454G	S	S	0.4815	0.2037	-0.2778	Germline	0.000822328	rs752999465
	287	WES_Data1	SDK1	7	4308362	4308362	C	T	nonsynonymous SNV	p.R674C	c.C2020T	Y	Y	0.4839	0.6806	0.1967	Germline	0.00858525	rs8514
	288	WES_Data1	TNRC18	7	5391702	5391702	C	G	nonsynonymous SNV	p.E1740Q	c.G5218C	S	S	0.4583	0.6228	0.1645	Germline	0.00828773	rs3801048	COSM3762753
	289	WES_Data1	PMS2	7	6026775	6026775	T	C	nonsynonymous SNV	p.K435E	c.A1303G	Y	Y	0.4878	0.2059	-0.2819	Germline	0.000273074	rs2228006	COSM4162329
	290	WES_Data1	PMS2	7	6026988	6026988	G	A	nonsynonymous SNV	p.P364S	c.C1090T	R	R	0.458	0.2212	-0.2368	Germline	8.00723e-05	rs1805321	COSM3736445
	291	WES_Data1	ANKRD61	7	6075823	6075823	A	T	nonsynonymous SNV	p.M355L	c.A1063T	W	W	0.4694	0.2763	-0.1931	Germline	0.000167599	rs2302334
	292	WES_Data1	FAM220A	7	6370194	6370194	C	T	nonsynonymous SNV	p.V198M	c.G592A	Y	Y	0.4909	0.2576	-0.2333	Germline	2.91104e-05	rs6952125
	293	WES_Data1	FAM220A	7	6370575	6370575	C	T	nonsynonymous SNV	p.G71R	c.G211A	Y	Y	0.4747	0.25	-0.2247	Germline	0.0018057	rs3750041	COSM3982241
	294	WES_Data1	DAGLB	7	6449496	6449496	T	C	nonsynonymous SNV	p.Q535R	c.A1604G	Y	Y	0.4727	0.6875	0.2148	Germline	1.21108e-05	rs2303361	COSM3982246
	295	WES_Data1	ZNF853	7	6656830	6656830	G	A	nonsynonymous SNV	p.G8R	c.G22A	R	R	0.4677	0.6941	0.2264	Germline	0.000906364	rs2243563	COSM1568896
	296	WES_Data1	ZNF853	7	6656897	6656897	A	G	nonsynonymous SNV	p.Q30R	c.A89G	R	R	0.3917	0.6296	0.2379	Germline	0.000740004	rs1806552	COSM3833104
	297	WES_Data1	CCZ1B	7	6859453	6859453	C	G	nonsynonymous SNV	p.E214D	c.G642C	S	S	0.62	0.2553	-0.3647	Germline	0.000284411	rs145992513	COSM4593370
	298	WES_Data1	COL28A1	7	7514235	7514235	C	G	nonsynonymous SNV	p.E433D	c.G1299C	S	S	0.5062	0.2391	-0.2671	Germline	0.00259679	rs6952195	COSM150235
	299	WES_Data1	THSD7A	7	11581121	11581121	T	C	nonsynonymous SNV	p.N583D	c.A1747G	Y	Y	0.4474	0.6316	0.1842	Germline	0.00578257	rs47	COSM4767778
	300	WES_Data1	VWDE	7	12376811	12376811	A	C	nonsynonymous SNV	p.F1370C	c.T4109G	M	M	0.5227	0.6774	0.1547	Germline	0.0141863	rs2192828
	301	WES_Data1	VWDE	7	12391319	12391319	G	T	nonsynonymous SNV	p.Q1141K	c.C3421A	K	T	0.4857	0.75	0.2643	LOH	0.0380436	rs6967385	COSM3738204
	302	WES_Data1	VWDE	7	12401021	12401021	C	T	nonsynonymous SNV	p.G894R	c.G2680A	Y	T	0.3878	0.7812	0.3934	LOH	6.20764e-07	rs80272295	COSM4004274
	303	WES_Data1	VWDE	7	12409263	12409263	C	A	nonsynonymous SNV	p.C775F	c.G2324T	M	M	0.3699	0.6812	0.3113	Germline	0.000179053	rs17165906	COSM4004276
	304	WES_Data1	VWDE	7	12409327	12409327	C	T	nonsynonymous SNV	p.E754K	c.G2260A	Y	Y	0.416	0.7019	0.2859	Germline	1.17772e-05	rs17165910	COSM4004279
	305	WES_Data1	VWDE	7	12409522	12409522	A	G	nonsynonymous SNV	p.Y689H	c.T2065C	R	R	0.4453	0.6885	0.2432	Germline	6.30982e-05	rs3823844
	306	WES_Data1	VWDE	7	12414725	12414725	G	A	stopgain	p.R385X	c.C1153T	R	A	0.4531	0.7931	0.34	LOH	0.000100366	rs17165936	COSM4161754
	307	WES_Data1	VWDE	7	12428803	12428803	G	A	nonsynonymous SNV	p.S142F	c.C425T	R	R	0.4388	0.6907	0.2519	Germline	0.000100724	rs848016
	308	WES_Data1	VWDE	7	12433347	12433347	C	T	nonsynonymous SNV	p.R39H	c.G116A	Y	T	0.4203	0.8167	0.3964	LOH	3.38241e-06	rs17165995
	309	WES_Data1	SCIN	7	12675690	12675690	G	A	nonsynonymous SNV	p.R200Q	c.G599A	R	R	0.3796	0.6296	0.25	Germline	0.00220664	rs35385652
	310	WES_Data1	SCIN	7	12675713	12675713	T	C	nonsynonymous SNV	p.F208L	c.T622C	Y	Y	0.4	0.5833	0.1833	Germline	0.0274997	rs17166250
	311	WES_Data1	ISPD	7	16460893	16460893	T	G	nonsynonymous SNV	p.S19R	c.A55C	K	K	0.6471	0.2632	-0.3839	Germline	0.000322062	rs7782939	COSM4162065
	312	WES_Data1	PRPS1L1	7	18066569	18066569	C	A	nonsynonymous SNV	p.E279D	c.G837T	M	M	0.4592	0.6786	0.2194	Germline	0.00666469	rs3800962	COSM3762552
	313	WES_Data1	MACC1	7	20198440	20198440	G	A	nonsynonymous SNV	p.S515L	c.C1544T	R	R	0.4586	0.225	-0.2336	Germline	4.02374e-05	rs975263	COSM3762560
	314	WES_Data1	DNAH11	7	21932044	21932044	C	T	nonsynonymous SNV	p.T4170I	c.C12509T	Y	T	0.3651	0.766	0.4009	LOH	2.64438e-05	rs12537531	COSM4004424
	315	WES_Data1	STEAP1B	7	22532260	22532260	A	G	nonsynonymous SNV	p.I229T	c.T686C	R	R	0.5072	0.2832	-0.224	Germline	0.000240235	rs16881817	COSM1294394
	316	WES_Data1	FAM126A	7	22985219	22985219	A	G	nonsynonymous SNV	p.S519P	c.T1555C	R	R	0.4958	0.2683	-0.2275	Germline	0.000916724	rs76265662
	317	WES_Data1	STK31	7	23757162	23757162	G	C	nonsynonymous SNV	p.Q48H	c.G144C	S	S	0.3793	0.7206	0.3413	Germline	2.00726e-05	rs6945306	COSM3762594
	318	WES_Data1	EEPD1	7	36327317	36327317	C	T	nonsynonymous SNV	p.P416S	c.C1246T	Y	Y	0.5172	0.6198	0.1026	Germline	0.0380316	rs196594	COSM5880706
	319	WES_Data1	POU6F2	7	39379285	39379285	C	T	nonsynonymous SNV	p.L186F	c.C556T	Y	Y	0.4062	0.7059	0.2997	Germline	0.00422046	rs140348812
	320	WES_Data1	GLI3	7	42004664	42004664	C	T	nonsynonymous SNV	p.G1336E	c.G4007A	Y	Y	0.5025	0.6154	0.1129	Germline	0.0111041	rs35280470	COSM5019129
	321	WES_Data1	POLM	7	44112873	44112873	G	T	nonsynonymous SNV	p.H439N	c.C1315A	K	K	0.5205	0.3025	-0.218	Germline	0.00216481	rs3218660
	322	WES_Data1	AEBP1	7	44147485	44147485	C	A	nonsynonymous SNV	p.P273T	c.C817A	M	M	0.3913	0.6209	0.2296	Germline	0.000383939	rs2537188	COSM453091
	323	WES_Data1	CCM2	7	45077978	45077978	G	A	nonsynonymous SNV	p.V74I	c.G220A	R	R	0.5088	0.681	0.1722	Germline	0.021558	rs2107732
	324	WES_Data1	NACAD	7	45122324	45122324	C	A	nonsynonymous SNV	p.C1152F	c.G3455T	M	M	0.5615	0.2565	-0.305	Germline	3.11389e-08	rs3735493	COSM4592706
	325	WES_Data1	NACAD	7	45122723	45122723	G	A	nonsynonymous SNV	p.A1019V	c.C3056T	R	R	0.5098	0.2886	-0.2212	Germline	7.77108e-06	rs61740895	COSM3762685
	326	WES_Data1	NACAD	7	45124286	45124286	A	G	nonsynonymous SNV	p.V498A	c.T1493C	R	R	0.5285	0.2992	-0.2293	Germline	1.51346e-05	rs3735494	COSM3762687
	327	WES_Data1	NACAD	7	45124465	45124465	A	T	nonsynonymous SNV	p.D438E	c.T1314A	W	W	0.5259	0.2723	-0.2536	Germline	5.93588e-06	rs3735495	COSM3762688
	328	WES_Data1	PKD1L1	7	47840387	47840387	C	T	nonsynonymous SNV	p.A2685T	c.G8053A	Y	Y	0.4759	0.7123	0.2364	Germline	5.52151e-06	rs13231277	COSM3762692
	329	WES_Data1	PKD1L1	7	47925331	47925331	C	G	nonsynonymous SNV	p.R1053P	c.G3158C	S	G	0.4242	0.7692	0.345	LOH	0.000840295	rs10274334	COSM4004488
	330	WES_Data1	ABCA13	7	48285485	48285485	C	T	nonsynonymous SNV	p.P506L	c.C1517T	Y	Y	0.4457	0.2381	-0.2076	Germline	0.000708084	rs1880738	COSM453164
	331	WES_Data1	FIGNL1	7	50514577	50514577	C	T	nonsynonymous SNV	p.V137M	c.G409A	Y	Y	0.4667	0.6324	0.1657	Germline	0.000721013	rs10235371
	332	WES_Data1	ZNF736	7	63808867	63808867	C	A	nonsynonymous SNV	p.A209E	c.C626A	M	M	0.5068	0.22	-0.2868	Germline	0.00109954	rs11976837
	333	WES_Data1	ZNF273	7	64389089	64389089	A	C	nonsynonymous SNV	p.E461D	c.A1383C	M	M	0.625	0.3231	-0.3019	Germline	0.000255833	rs2017252	COSM4416376
	334	WES_Data1	ZNF92	7	64863392	64863392	C	T	nonsynonymous SNV	p.A46V	c.C137T	Y	Y	0.4074	0.6984	0.291	Germline	0.00043247	rs10265083	COSM4417082
	335	WES_Data1	ZNF92	7	64864607	64864607	G	A	nonsynonymous SNV	p.R451H	c.G1352A	R	R	0.3793	0.7	0.3207	Germline	0.0269797	rs10239197	COSM4417940
	336	WES_Data1	TYW1	7	66703328	66703328	G	A	nonsynonymous SNV	p.D671N	c.G2011A	R	R	0.5321	0.3056	-0.2265	Germline	0.00203982	rs28450001	COSM3774294
	337	WES_Data1	POM121	7	72418963	72418963	T	C	nonsynonymous SNV	p.L985P	c.T2954C	Y	Y	0.5	0.7447	0.2447	Germline	0.00439149	rs1107	COSM3982257
	338	WES_Data1	DNAJC30	7	73097713	73097713	G	A	nonsynonymous SNV	p.P14L	c.C41T	R	R	0.4512	0.7059	0.2547	Germline	0.000705656	rs61751896
	339	WES_Data1	TMEM270	7	73279482	73279482	T	C	nonsynonymous SNV	p.W78R	c.T232C	Y	Y	0.5684	0.7297	0.1613	Germline	0.0219611	rs13227841
	340	WES_Data1	GTF2IRD2	7	74212036	74212036	C	G	nonsynonymous SNV	p.K605N	c.G1815C	S	S	0.4626	0.2717	-0.1909	Germline	0.00229091	rs707394	COSM4162429
	341	WES_Data1	UPK3B	7	76140186	76140186	T	C	nonsynonymous SNV	p.S73P	c.T217C	Y	Y	0.4762	0.6905	0.2143	Germline	0.0239731	rs12666503
	342	WES_Data1	UPK3B	7	76140315	76140315	G	A	nonsynonymous SNV	p.D116N	c.G346A	R	R	0.3265	0.7333	0.4068	Germline	0.000454609	rs144609046
	343	WES_Data1	PCLO	7	82453708	82453708	A	C	nonsynonymous SNV	p.S4814A	c.T14440G	M	M	0.5147	0.2321	-0.2826	Germline	0.00109413	rs2522833
	344	WES_Data1	PCLO	7	82764425	82764425	C	G	nonsynonymous SNV	p.S814T	c.G2441C	S	S	0.4867	0.2846	-0.2021	Germline	0.000492986	rs2877
	345	WES_Data1	PCLO	7	82784456	82784456	A	G	nonsynonymous SNV	p.S501P	c.T1501C	R	G	0.5652	0.8571	0.2919	LOH	0.0353475	rs6972461
	346	WES_Data1	ZNF804B	7	88965021	88965021	G	A	nonsynonymous SNV	p.E909K	c.G2725A	R	R	0.4961	0.236	-0.2601	Germline	7.75049e-05	rs10487075
	347	WES_Data1	MTERF1	7	91503228	91503228	C	T	nonsynonymous SNV	p.A274T	c.G820A	Y	Y	0.449	0.2258	-0.2232	Germline	0.000897094	rs10266424
	348	WES_Data1	AKAP9	7	91630620	91630620	G	T	nonsynonymous SNV	p.M463I	c.G1389T	K	K	0.4928	0.697	0.2042	Germline	0.0123482	rs6964587	COSM4415964
	349	WES_Data1	AKAP9	7	91712698	91712698	A	G	nonsynonymous SNV	p.N2792S	c.A8375G	R	R	0.5492	0.7157	0.1665	Germline	0.00742688	rs6960867	COSM4415002
	350	WES_Data1	LRRD1	7	91779971	91779971	T	G	nonsynonymous SNV	p.I719L	c.A2155C	K	K	0.3778	0.675	0.2972	Germline	0.00563371	rs6465353	COSM3833473
	351	WES_Data1	ANKIB1	7	92028039	92028039	C	A	nonsynonymous SNV	p.L1016M	c.C3046A	M	M	0.5579	0.3295	-0.2284	Germline	0.00150117	rs38794	COSM3762898
	352	WES_Data1	GATAD1	7	92077203	92077203	G	A	nonsynonymous SNV	p.G54S	c.G160A	R	A	0.4894	0.7805	0.2911	LOH	0.00439723	rs10281879	COSM4406992
	353	WES_Data1	GATAD1	7	92085763	92085763	C	T	nonsynonymous SNV	p.R233W	c.C697T	Y	Y	0.5041	0.243	-0.2611	Germline	3.65781e-05	rs34768413
	354	WES_Data1	SAMD9L	7	92763720	92763720	G	A	nonsynonymous SNV	p.A522V	c.C1565T	R	A	0.45	0.8056	0.3556	LOH	5.1689e-06	rs151304501
	355	WES_Data1	PPP1R9A	7	94540527	94540527	G	A	nonsynonymous SNV	p.D368N	c.G1102A	R	R	0.4909	0.2625	-0.2284	Germline	0.00111061	rs61737465
	356	WES_Data1	PON1	7	94946084	94946084	A	T	nonsynonymous SNV	p.L55M	c.T163A	W	W	0.486	0.7424	0.2564	Germline	0.000674614	rs854560	COSM5618522
	357	WES_Data1	MUC3A	7	100550203	100550203	T	A	nonsynonymous SNV	p.S262T	c.T784A	W	W	0.2381	0.342	0.1039	Germline	0.0246723	rs75141335	COSM304007
	358	WES_Data1	MKRN1	7	140158851	140158851	C	G	nonsynonymous SNV	p.V243L	c.G727C	S	S	0.3985	0.5328	0.1343	Germline	0.021465	rs2272095
	359	WES_Data1	PRAG1	8	8234714	8234714	C	T	nonsynonymous SNV	p.R402Q	c.G1205A	Y	Y	0.3688	0.216	-0.1528	Germline	0.00131772	rs3896980	COSM3763424
	360	WES_Data1	RP1L1	8	10467653	10467653	C	T	nonsynonymous SNV	p.A1319T	c.G3955A	C	Y	0.1912	0.2892	0.098	Somatic	0.00278146	rs73201156	COSM4597528
	361	WES_Data1	FDFT1	8	11666337	11666337	A	G	nonsynonymous SNV	p.K104R	c.A311G	R	G	0.6686	0.7902	0.1216	LOH	0.00462119	rs4731	COSM3763008
	362	WES_Data1	KIAA1456	8	12879198	12879198	A	T	nonsynonymous SNV	p.H211L	c.A632T	W	W	0.5976	0.7021	0.1045	Germline	0.00558818	rs34995506	COSM3763042
	363	WES_Data1	HR	8	21984945	21984945	C	T	nonsynonymous SNV	p.G337D	c.G1010A	Y	T	0.6573	0.7513	0.094	LOH	0.0390034	rs12675375	COSM454303
	364	WES_Data1	CDCA2	8	25364331	25364331	G	A	nonsynonymous SNV	p.V702I	c.G2104A	R	A	0.6667	0.7671	0.1004	LOH	0.0197129	rs4872318	COSM3763276
	365	WES_Data1	PTK2B	8	27308585	27308585	A	C	nonsynonymous SNV	p.K796T	c.A2387C	M	M	0.4848	0.7449	0.2601	Germline	0.000617391	rs751019
	366	WES_Data1	ADGRA2	8	37693279	37693279	G	A	nonsynonymous SNV	p.A681T	c.G2041A	R	R	0.4697	0.2111	-0.2586	Germline	0.000593374	rs77369926
	367	WES_Data1	ZMAT4	8	40438757	40438757	T	C	nonsynonymous SNV	p.T125A	c.A373G	Y	Y	0.6243	0.746	0.1217	Germline	0.00354577	rs17851751	COSM1179839
	368	WES_Data1	PCMTD1	8	52733128	52733128	T	G	nonsynonymous SNV	p.N210T	c.A629C	T	K	0.0625	0.3182	0.2557	Somatic	0.0388991	rs62506083	COSM4909294
	369	WES_Data1	RB1CC1	8	53586706	53586706	A	G	nonsynonymous SNV	p.M234T	c.T701C	R	R	0.3497	0.2244	-0.1253	Germline	0.0018485	rs17337252	COSM3763359
	370	WES_Data1	KCNB2	8	73848812	73848812	G	T	nonsynonymous SNV	p.V408F	c.G1222T	K	K	0.3033	0.5056	0.2023	Germline	5.01017e-07	.
	371	WES_Data1	SLC10A5	8	82606244	82606244	A	G	nonsynonymous SNV	p.F322L	c.T964C	R	R	0.5856	0.7366	0.151	Germline	0.00529708	rs142422017
	372	WES_Data1	CA3	8	86351997	86351997	G	A	nonsynonymous SNV	p.V31I	c.G91A	R	R	0.6	0.7357	0.1357	Germline	0.0175618	rs20571	COSM3982611
	373	WES_Data1	NBN	8	90958370	90958370	T	G	nonsynonymous SNV	p.K690Q	c.A2068C	K	K	0.7059	0.2424	-0.4635	Germline	0.00205539	rs587780092
	374	WES_Data1	ERICH5	8	99101976	99101976	A	C	nonsynonymous SNV	p.Q244P	c.A731C	M	M	0.6095	0.7321	0.1226	Germline	0.00519253	rs35368005	COSM6050100
	375	WES_Data1	FZD6	8	104337367	104337367	A	C	nonsynonymous SNV	p.M40L	c.A118C	M	M	0.6203	0.7462	0.1259	Germline	0.000269588	rs3808553	COSM3762967
	376	WES_Data1	DEPTOR	8	121061879	121061879	G	A	nonsynonymous SNV	p.S288N	c.G863A	R	A	0.5913	0.8072	0.2159	LOH	3.428e-07	rs4871827	COSM3736458
	377	WES_Data1	LRRC6	8	133637659	133637659	G	A	nonsynonymous SNV	p.T150I	c.C449T	R	R	0.5647	0.7251	0.1604	Germline	0.000494657	rs2293979
	378	WES_Data1	TG	8	133900252	133900252	T	G	nonsynonymous SNV	p.S734A	c.T2200G	K	G	0.5432	0.7791	0.2359	LOH	4.74807e-07	rs180223	COSM4162675
	379	WES_Data1	GPR20	8	142367335	142367335	T	C	nonsynonymous SNV	p.H230R	c.A689G	Y	C	0.7116	0.7703	0.0587	LOH	0.0475519	rs10875472	COSM3763064
	380	WES_Data1	JRK	8	143746050	143746050	C	T	nonsynonymous SNV	p.G476R	c.G1426A	Y	T	0.663	0.7907	0.1277	LOH	0.00195752	rs2976399	COSN23013007
	381	WES_Data1	CYP11B2	8	143994266	143994266	A	G	nonsynonymous SNV	p.V386A	c.T1157C	R	R	0.6083	0.744	0.1357	Germline	0.0103305	rs61757294	COSM4162722
	382	WES_Data1	C8orf31	8	144124609	144124609	T	C	nonsynonymous SNV	p.L39P	c.T116C	Y	C	0.6769	0.7893	0.1124	LOH	0.00189475	rs11136300	COSM4162724
	383	WES_Data1	ZC3H3	8	144522387	144522387	G	T	stopgain	p.S880X	c.C2639A	K	T	0.5854	0.7778	0.1924	LOH	0.0455118	rs2272754
	384	WES_Data1	ZC3H3	8	144522388	144522388	A	T	nonsynonymous SNV	p.S880T	c.T2638A	W	T	0.5854	0.7872	0.2018	LOH	0.0344906	rs2272753
	385	WES_Data1	SLC39A4	8	145639726	145639726	T	C	nonsynonymous SNV	p.T332A	c.A994G	Y	C	0.5659	0.7791	0.2132	LOH	6.73759e-05	rs2272662	COSM1132811
	386	WES_Data1	GPT	8	145729727	145729727	C	A	nonsynonymous SNV	p.H14N	c.C40A	M	A	0.6698	0.8091	0.1393	LOH	0.0144408	rs1063739	COSM3763201
	387	WES_Data1	LRRC24	8	145747920	145747920	T	G	nonsynonymous SNV	p.E494A	c.A1481C	K	K	0.6014	0.7157	0.1143	Germline	0.0183732	rs13277542	COSM3750123
	388	WES_Data1	ZNF517	8	146032842	146032842	G	A	nonsynonymous SNV	p.V174M	c.G520A	R	R	0.4236	0.2655	-0.1581	Germline	2.18288e-05	rs62531506	COSM4162867
	389	WES_Data1	DOCK8	9	334337	334337	A	G	nonsynonymous SNV	p.N345S	c.A1034G	R	R	0.3846	0.6476	0.263	Germline	0.000114607	rs10970979	COSM3765451
	390	WES_Data1	PUM3	9	2838470	2838470	C	T	nonsynonymous SNV	p.S13N	c.G38A	Y	Y	0.6949	0.3607	-0.3342	Germline	0.000222651	rs10968457	COSM4419256
	391	WES_Data1	FAM205A	9	34723935	34723935	C	T	nonsynonymous SNV	p.R1101H	c.G3302A	Y	Y	0.3696	0.5132	0.1436	Germline	0.0433591	rs2297134	COSM3848423
	392	WES_Data1	SVEP1	9	113169631	113169631	G	A	nonsynonymous SNV	p.A2750V	c.C8249T	R	R	0.3946	0.5172	0.1226	Germline	0.0233579	rs7030192	COSM3763520
	393	WES_Data1	C9orf84	9	114454292	114454292	C	T	nonsynonymous SNV	p.R1219H	c.G3656A	Y	Y	0.4079	0.541	0.1331	Germline	0.0467063	rs150006859
	394	WES_Data1	C5	9	123769200	123769200	C	T	nonsynonymous SNV	p.V808I	c.G2422A	Y	Y	0.2222	0.6071	0.3849	Germline	0.00193014	rs17611	COSM4407021
	395	WES_Data1	PLPP7	9	134183379	134183379	C	T	nonsynonymous SNV	p.T174M	c.C521T	Y	Y	0.3826	0.5042	0.1216	Germline	0.0408216	rs2966332	COSM3750159
	396	WES_Data1	AKR1E2	10	4889403	4889403	C	T	stopgain	p.R203X	c.C607T	T	T	0.8202	1	0.1798	Germline	4.34745e-05	rs12240276	COSM3751806
	397	WES_Data1	PRKCQ	10	6527143	6527143	G	A	nonsynonymous SNV	p.P205L	c.C614T	A	A	0.8043	1	0.1957	Germline	0.00126816	rs2236379	COSM3751896
	398	WES_Data1	ITIH2	10	7780646	7780646	C	G	nonsynonymous SNV	p.P674A	c.C2020G	G	G	0.8485	1	0.1515	Germline	4.95724e-05	rs3740217	COSM3998095
	399	WES_Data1	USP6NL	10	11505189	11505189	C	T	nonsynonymous SNV	p.A597T	c.G1789A	T	T	0.8966	1	0.1034	Germline	0.0188974	.
	400	WES_Data1	UPF2	10	12046546	12046546	T	C	nonsynonymous SNV	p.N496S	c.A1487G	C	C	0.7949	1	0.2051	Germline	0.0036467	rs7079388	COSM3751555
	401	WES_Data1	DHTKD1	10	12131081	12131081	T	G	nonsynonymous SNV	p.Y272D	c.T814G	G	G	0.8049	1	0.1951	Germline	4.10416e-06	rs3740015	COSM3751560
	402	WES_Data1	C10orf111	10	15138615	15138615	C	T	nonsynonymous SNV	p.R70K	c.G209A	T	T	0.85	1	0.15	Germline	0.00063428	rs7896053	COSM4144570
	403	WES_Data1	RPP38	10	15145855	15145855	C	G	nonsynonymous SNV	p.A181G	c.C542G	G	G	0.8596	1	0.1404	Germline	0.00260099	rs15772
	404	WES_Data1	RPP38	10	15146061	15146061	C	G	nonsynonymous SNV	p.R250G	c.C748G	G	G	0.8	1	0.2	Germline	0.00139416	rs34040166
	405	WES_Data1	PLXDC2	10	20506418	20506418	G	A	nonsynonymous SNV	p.V347I	c.G1039A	A	A	0.8214	1	0.1786	Germline	0.0234721	rs3817405	COSM3751681
	406	WES_Data1	C10orf113	10	21414892	21414892	C	G	nonsynonymous SNV	p.D110H	c.G328C	G	G	0.8229	1	0.1771	Germline	2.48705e-05	rs625223	COSM3751684
	407	WES_Data1	KIAA1217	10	24832127	24832127	G	T	stopgain	p.E1310X	c.G3928T	G	K	0	0.3059	0.3059	Somatic	1.80022e-15	.
	408	WES_Data1	LYZL1	10	29581493	29581493	A	C	nonsynonymous SNV	p.Q108P	c.A323C	M	M	0.3651	0.4795	0.1144	Germline	0.0319067	rs3818551	COSM3747167
	409	WES_Data1	TET1	10	70332580	70332580	A	G	nonsynonymous SNV	p.D162G	c.A485G	R	R	0.4444	0.5477	0.1033	Germline	0.0282822	rs10823229	COSM3751902
	410	WES_Data1	SFTPA1	10	81373726	81373726	G	T	nonsynonymous SNV	p.D202Y	c.G604T	G	K	0.016	0.4632	0.4472	Somatic	5.67938e-30	.
	411	WES_Data1	FAM35A	10	88930249	88930249	A	T	nonsynonymous SNV	p.S550C	c.A1648T	W	W	0.4	0.5797	0.1797	Germline	0.0351119	rs11202365	COSM4144943
	412	WES_Data1	IFIT2	10	91066075	91066075	A	G	nonsynonymous SNV	p.K121R	c.A362G	R	R	0.3333	0.4968	0.1635	Germline	0.00301938	rs2070845	COSM4417238
	413	WES_Data1	RRP12	10	99116903	99116903	C	T	nonsynonymous SNV	p.R1181Q	c.G3542A	Y	Y	0.3491	0.4914	0.1423	Germline	0.0221515	rs1048445	COSM5021676
	414	WES_Data1	PLEKHA1	10	124189197	124189197	A	G	nonsynonymous SNV	p.T320A	c.A958G	R	R	0.375	0.5362	0.1612	Germline	0.0317003	rs1045216	COSM3751580
	415	WES_Data1	CFAP46	10	134623959	134623959	T	C	nonsynonymous SNV	p.S2540G	c.A7618G	Y	Y	0.44	0.5769	0.1369	Germline	0.0195407	rs2254419	COSM3930962
	416	WES_Data1	LMNTD2	11	558165	558165	T	G	nonsynonymous SNV	p.Q132P	c.A395C	K	K	0.45	0.6087	0.1587	Germline	0.0381925	rs79820513
	417	WES_Data1	MUC6	11	1018262	1018262	G	C	nonsynonymous SNV	p.H1513Q	c.C4539G	G	S	0.1111	0.2407	0.1296	Somatic	0.0459913	rs78003962	COSM3931206
	418	WES_Data1	MUC2	11	1093135	1093135	A	C	nonsynonymous SNV	p.T1652P	c.A4954C	A	M	0.1566	0.275	0.1184	Somatic	0.0492521	rs56080332	COSM3773572
	419	WES_Data1	MUC5B	11	1271429	1271429	C	T	nonsynonymous SNV	p.P4440L	c.C13319T	Y	Y	0.3243	0.5385	0.2142	Germline	0.0365422	rs2943516	COSM4422677
	420	WES_Data1	MRGPRE	11	3249984	3249984	C	T	nonsynonymous SNV	p.G16S	c.G46A	Y	Y	0.4759	0.5974	0.1215	Germline	0.0231702	rs12295710	COSM4145658
	421	WES_Data1	OR52E6	11	5862845	5862845	A	G	nonsynonymous SNV	p.S95P	c.T283C	R	R	0.5556	0.3333	-0.2223	Germline	0.000302828	rs4592451	COSM4145924
	422	WES_Data1	DCHS1	11	6644131	6644131	C	T	nonsynonymous SNV	p.A2926T	c.G8776A	C	Y	0	0.5546	0.5546	Somatic	1.98276e-28	rs781474739
	423	WES_Data1	CSNK2A3	11	11374269	11374269	A	G	nonsynonymous SNV	p.I133T	c.T398C	R	R	0.4167	0.5244	0.1077	Germline	0.0419139	rs2071460	COSN15643935
	424	WES_Data1	MICALCL	11	12315915	12315915	A	G	nonsynonymous SNV	p.S313G	c.A937G	R	R	0.5891	0.3677	-0.2214	Germline	0.000150637	rs1493954	COSM4145424
	425	WES_Data1	ZDHHC13	11	19167850	19167850	A	G	nonsynonymous SNV	p.K99R	c.A296G	R	R	0.375	0.5732	0.1982	Germline	0.0107152	rs2271001	COSM5001953
	426	WES_Data1	OR4C3	11	48346961	48346961	A	T	nonsynonymous SNV	p.N157Y	c.A469T	W	W	0.3367	0.4384	0.1017	Germline	0.0211397	rs75493089	COSM4145773
	427	WES_Data1	OR4C3	11	48346962	48346962	A	G	nonsynonymous SNV	p.N157S	c.A470G	R	R	0.335	0.4364	0.1014	Germline	0.0211074	rs74589050	COSM4145774
	428	WES_Data1	OR4C5	11	48387757	48387757	A	C	nonsynonymous SNV	p.F87L	c.T261G	A	M	0.1141	0.203	0.0889	Somatic	0.0125959	rs74557904	COSM5425200
	429	WES_Data1	OR4A47	11	48510654	48510654	A	C	nonsynonymous SNV	p.I104L	c.A310C	M	M	0.4146	0.5704	0.1558	Germline	0.00870634	rs7103557	COSM5432722
	430	WES_Data1	OR4A47	11	48510777	48510777	G	A	nonsynonymous SNV	p.V145M	c.G433A	R	R	0.4918	0.6174	0.1256	Germline	0.0347978	rs7103992	COSM4998614
	431	WES_Data1	OR9G1;OR9G9	11	56468720	56468720	T	C	nonsynonymous SNV	p.L286P	c.T857C	Y	Y	0.2424	0.3432	0.1008	Germline	0.0379897	rs66943455	COSM4145900
	432	WES_Data1	MS4A13	11	60291413	60291413	C	T	nonsynonymous SNV	p.P58L	c.C173T	Y	Y	0.25	0.5714	0.3214	Germline	0.0375123	rs6591595	COSM5766925
	433	WES_Data1	CD5	11	60886913	60886913	C	T	nonsynonymous SNV	p.P167L	c.C500T	Y	Y	0.4217	0.559	0.1373	Germline	0.0087611	rs2241002	COSM3752551
	434	WES_Data1	PGM2L1	11	74109166	74109166	A	G	nonsynonymous SNV	p.L14P	c.T41C	R	R	0.5769	0.3088	-0.2681	Germline	0.00285558	rs12049823	COSM429848
	435	WES_Data1	MYO7A	11	76919478	76919478	C	A	nonsynonymous SNV	p.L1954I	c.C5860A	M	M	0.4	0.6027	0.2027	Germline	0.01347	rs948962	COSM3739295
	436	WES_Data1	TRIM49	11	89531780	89531780	G	C	nonsynonymous SNV	p.H293D	c.C877G	G	S	0	0.2326	0.2326	Somatic	0.00200868	rs149578071	COSM3810612
	437	WES_Data1	FAT3	11	92534773	92534773	C	A	nonsynonymous SNV	p.A2865E	c.C8594A	C	M	0	0.2349	0.2349	Somatic	6.65629e-13	.
	438	WES_Data1	CBL	11	119149240	119149240	T	G	nonsynonymous SNV	p.C416W	c.T1248G	T	K	0	0.2449	0.2449	Somatic	0.000292434	.	COSM133827
	439	WES_Data1	OR8B2	11	124253181	124253181	T	C	nonsynonymous SNV	p.H20R	c.A59G	Y	Y	0.5606	0.6667	0.1061	Germline	0.0458817	rs28373946	COSM4145440
	440	WES_Data1	ROBO4	11	124767067	124767067	T	C	nonsynonymous SNV	p.Q54R	c.A161G	Y	Y	0.5	0.7333	0.2333	Germline	0.0394279	rs59648931	COSM3752203
	441	WES_Data1	SNX19	11	130784694	130784694	C	T	nonsynonymous SNV	p.G381S	c.G1141A	Y	Y	0.3837	0.5309	0.1472	Germline	0.0396752	rs61736758	COSM3998340
	442	WES_Data1	IQSEC3	12	247923	247923	A	G	nonsynonymous SNV	p.D162G	c.A485G	R	R	0.3625	0.5645	0.202	Germline	0.0127948	rs75677829
	443	WES_Data1	CRACR2A	12	3789452	3789452	C	T	nonsynonymous SNV	p.A98T	c.G292A	Y	Y	0.3857	0.5909	0.2052	Germline	0.0129901	rs17836273
	444	WES_Data1	NCAPD2	12	6619284	6619284	C	G	nonsynonymous SNV	p.Q83E	c.C247G	S	S	0.6091	0.4132	-0.1959	Germline	0.00218838	rs714774	COSM3753449
	445	WES_Data1	KLRC4-KLRK1;KLRK1	12	10532326	10532326	T	C	nonsynonymous SNV	p.T72A	c.A214G	Y	Y	0.3571	0.7368	0.3797	Germline	0.0336192	rs2255336	COSM430206
	446	WES_Data1	KRT72	12	52981442	52981442	C	A	nonsynonymous SNV	p.R386L	c.G1157T	M	M	0.3966	0.6049	0.2083	Germline	0.0119994	rs11170183	COSM3927706
	447	WES_Data1	OR6C68	12	55886489	55886489	T	A	nonsynonymous SNV	p.F110I	c.T328A	W	W	0.4681	0.6055	0.1374	Germline	0.0344318	rs7304753	COSM3753386
	448	WES_Data1	BEST3	12	70037520	70037520	G	A	nonsynonymous SNV	p.P383L	c.C1148T	R	R	0.4607	0.6044	0.1437	Germline	0.0371532	rs61747221	COSM3998928
	449	WES_Data1	USP44	12	95927762	95927762	T	C	nonsynonymous SNV	p.T91A	c.A271G	Y	Y	0.5952	0.4332	-0.162	Germline	0.00111606	rs3812813
	450	WES_Data1	APAF1	12	99060134	99060134	A	G	nonsynonymous SNV	p.Q443R	c.A1328G	R	G	0.3846	0.8667	0.4821	LOH	0.0111365	rs150056794
	451	WES_Data1	OR4N2	14	20295834	20295834	T	C	nonsynonymous SNV	p.I76T	c.T227C	Y	Y	0.2581	0.4923	0.2342	Germline	0.00535615	rs2801164	COSM5958203
	452	WES_Data1	PLEKHH1	14	68029313	68029313	G	A	nonsynonymous SNV	p.R322Q	c.G965A	R	R	0.3989	0.5231	0.1242	Germline	0.010686	rs2236235	COSM3754051
	453	WES_Data1	ATG2B	14	96757977	96757977	A	G	nonsynonymous SNV	p.C1847R	c.T5539C	R	R	0.3684	0.6444	0.276	Germline	0.0108383	rs777049236
	454	WES_Data1	WDR25	14	100847437	100847437	A	G	nonsynonymous SNV	p.K59R	c.A176G	R	R	0.4561	0.5619	0.1058	Germline	0.0171027	rs2273801
	455	WES_Data1	SPTBN5	15	42168400	42168400	C	T	nonsynonymous SNV	p.R1345H	c.G4034A	Y	Y	0.3514	0.5248	0.1734	Germline	0.00799819	rs2290559	COSM4416635
	456	WES_Data1	PLA2G4D	15	42363043	42363043	T	G	nonsynonymous SNV	p.K639Q	c.A1915C	K	K	0.3492	0.5893	0.2401	Germline	0.00723984	rs74678783	COSM3773720
	457	WES_Data1	TMEM266	15	76496232	76496232	G	A	nonsynonymous SNV	p.R391H	c.G1172A	R	R	0.4724	0.6054	0.133	Germline	0.0185851	rs937732	COSM5425297
	458	WES_Data1	SH2D7	15	78390414	78390414	T	C	nonsynonymous SNV	p.M137T	c.T410C	Y	Y	0.4479	0.5505	0.1026	Germline	0.0270808	rs2289524	COSM4128427
	459	WES_Data1	PDIA2	16	335654	335654	C	T	nonsynonymous SNV	p.A357V	c.C1070T	Y	Y	0.3714	0.5042	0.1328	Germline	0.031118	rs375852621
	460	WES_Data1	PDIA2	16	336396	336396	G	A	nonsynonymous SNV	p.R388Q	c.G1163A	R	R	0.4435	0.5889	0.1454	Germline	0.026905	rs400037	COSM3754873
	461	WES_Data1	IFT140	16	1634385	1634385	C	T	nonsynonymous SNV	p.V398I	c.G1192A	Y	Y	0.4058	0.5203	0.1145	Germline	0.0342022	rs34762152	COSM3754711
	462	WES_Data1	NSMCE1	16	27246617	27246617	T	C	nonsynonymous SNV	p.N47S	c.A140G	Y	Y	0.5316	0.2812	-0.2504	Germline	0.00206626	rs17856580
	463	WES_Data1	ARMC5	16	31476458	31476458	C	T	nonsynonymous SNV	p.A705V	c.C2114T	Y	Y	0.3778	0.5213	0.1435	Germline	0.0351947	rs11150624	COSM1599969
	464	WES_Data1	SLC12A3	16	56933519	56933519	G	A	nonsynonymous SNV	p.R913Q	c.G2738A	R	R	0.3721	0.5301	0.158	Germline	0.0279265	rs11643718
	465	WES_Data1	MARVELD3	16	71660404	71660404	G	A	nonsynonymous SNV	p.R91Q	c.G272A	R	R	0.3947	0.6	0.2053	Germline	0.0499	rs61753635	COSM3755041
	466	WES_Data1	PKD1L2	16	81242102	81242102	G	A	nonsynonymous SNV	p.R252W	c.C754T	R	R	0.3651	0.5417	0.1766	Germline	0.0297286	rs6420424	COSM3755116
	467	WES_Data1	DNAAF1	16	84209738	84209738	T	C	nonsynonymous SNV	p.L397S	c.T1190C	Y	Y	0.4453	0.5503	0.105	Germline	0.0469037	rs2288020	COSM148130
	468	WES_Data1	MAP2K3	17	21203893	21203893	T	C	nonsynonymous SNV	p.S39P	c.T115C	Y	Y	0.2857	0.4479	0.1622	Germline	0.00140593	rs34105301	COSM4591731
	469	WES_Data1	MAP2K3	17	21203941	21203941	G	A	nonsynonymous SNV	p.A55T	c.G163A	R	R	0.271	0.3723	0.1013	Germline	0.0419966	rs2305873	COSM5459724
	470	WES_Data1	KCNJ12;KCNJ18	17	21319069	21319069	G	A	nonsynonymous SNV	p.E139K	c.G415A	G	R	0.1722	0.2283	0.0561	Somatic	0.0316436	rs76265595	COSM312196
	471	WES_Data1	KCNJ12;KCNJ18	17	21319079	21319079	C	A	nonsynonymous SNV	p.T142N	c.C425A	C	M	0.1747	0.2327	0.058	Somatic	0.0265571	rs76518282	COSM4129714
	472	WES_Data1	KCNJ12;KCNJ18	17	21319786	21319786	G	A	nonsynonymous SNV	p.E378K	c.G1132A	G	R	0.1181	0.2353	0.1172	Somatic	0.00511387	rs78547883	COSM312204
	473	WES_Data1	KRT40	17	39135084	39135084	A	G	nonsynonymous SNV	p.W390R	c.T1168C	R	R	0.4783	0.7429	0.2646	Germline	0.0385232	rs8064733	COSM3755484
	474	WES_Data1	ARL17A;ARL17B	17	44430254	44430254	G	C	nonsynonymous SNV	p.A64G	c.C191G	G	S	0	0.32	0.32	Somatic	0.0280143	rs35595570	COSM249098
	475	WES_Data1	ABCA6	17	67109833	67109833	T	A	nonsynonymous SNV	p.N610Y	c.A1828T	T	W	0.1053	0.4	0.2947	Somatic	0.0307647	rs9282554	COSM148327
	476	WES_Data1	SLC38A10	17	79225026	79225026	C	T	nonsynonymous SNV	p.A778T	c.G2332A	C	Y	0.1286	0.2833	0.1547	Somatic	0.0237815	rs67972063	COSM5414466
	477	WES_Data1	TMEM200C	18	5891438	5891438	C	T	nonsynonymous SNV	p.D209N	c.G625A	C	Y	0	0.4915	0.4915	Somatic	1.39343e-11	rs756360747
	478	WES_Data1	POTEC	18	14542979	14542979	A	G	nonsynonymous SNV	p.M56T	c.T167C	A	R	0.1867	0.3425	0.1558	Somatic	0.0244145	rs200806970	COSM4130925
	479	WES_Data1	ELP2	18	33725931	33725931	G	A	nonsynonymous SNV	p.V235M	c.G703A	R	R	0.3467	0.5165	0.1698	Germline	0.0205696	rs1785928	COSM1388588
	480	WES_Data1	MOCOS	18	33848581	33848581	T	C	nonsynonymous SNV	p.V867A	c.T2600C	Y	Y	0.4105	0.5487	0.1382	Germline	0.0322591	rs1057251	COSM5420074
	481	WES_Data1	ADNP2	18	77893552	77893552	A	G	nonsynonymous SNV	p.T86A	c.A256G	R	R	0.5795	0.6872	0.1077	Germline	0.0177073	rs78503084
	482	WES_Data1	ZFR2	19	3831709	3831709	C	T	nonsynonymous SNV	p.V183M	c.G547A	Y	Y	0.2807	0.4429	0.1622	Germline	0.0442241	rs2240234	COSM4131762
	483	WES_Data1	FUT5	19	5867425	5867425	G	T	stopgain	p.C104X	c.C312A	G	K	0	0.3036	0.3036	Somatic	3.42448e-26	.
	484	WES_Data1	PRAM1	19	8564469	8564469	C	G	nonsynonymous SNV	p.E75Q	c.G223C	G	G	0.9515	0.8229	-0.1286	Germline	0.00343916	rs4990821	COSM4592654
	485	WES_Data1	CCDC151	19	11541539	11541539	G	C	nonsynonymous SNV	p.L88V	c.C262G	S	S	0.5778	0.7222	0.1444	Germline	0.0301724	rs61739927
	486	WES_Data1	OR7C1	19	14910573	14910573	C	T	nonsynonymous SNV	p.V126I	c.G376A	Y	Y	0.2232	0.3939	0.1707	Germline	0.00306498	rs10415562
	487	WES_Data1	OR7A10	19	14952017	14952017	T	A	nonsynonymous SNV	p.I225L	c.A673T	W	W	0.2105	0.4178	0.2073	Germline	0.00028747	rs11880955	COSM3756380
	488	WES_Data1	NOTCH3	19	15273335	15273335	C	T	nonsynonymous SNV	p.V1952M	c.G5854A	Y	T	0.5652	0.7612	0.196	LOH	0.0124433	rs115582213	COSM5019789
	489	WES_Data1	WDR87	19	38378539	38378539	G	C	nonsynonymous SNV	p.N1924K	c.C5772G	S	C	0.6535	0.7635	0.11	LOH	0.0304217	rs10422056	COSM4590944
	490	WES_Data1	PSG6	19	43420451	43420451	G	C	nonsynonymous SNV	p.H85D	c.C253G	C	S	0.8062	0.64	-0.1662	Germline	0.00151758	rs3198831	COSM3756896
	491	WES_Data1	GIPR	19	46181392	46181392	G	C	nonsynonymous SNV	p.E318Q	c.G952C	S	C	0.6613	0.8293	0.168	LOH	0.0477044	rs1800437	COSM4132137
	492	WES_Data1	FBXO46	19	46216642	46216642	G	T	nonsynonymous SNV	p.P38T	c.C112A	K	K	0.2828	0.404	0.1212	Germline	0.0496824	rs11537711
	493	WES_Data1	IRF3	19	50162909	50162909	C	G	nonsynonymous SNV	p.S154T	c.G461C	S	S	0.5566	0.6963	0.1397	Germline	0.0178953	rs7251	COSM148687
	494	WES_Data1	SIGLEC12	19	52000672	52000672	G	A	nonsynonymous SNV	p.T360M	c.C1079T	R	R	0.3709	0.2063	-0.1646	Germline	0.001999	rs3829658	COSM148702
	495	WES_Data1	ZNF577	19	52376507	52376507	T	C	nonsynonymous SNV	p.K187E	c.A559G	Y	Y	0.5764	0.7478	0.1714	Germline	0.0028335	rs2288868
	496	WES_Data1	TMC4	19	54676763	54676763	C	T	nonsynonymous SNV	p.G17E	c.G50A	Y	Y	0.2571	0.4035	0.1464	Germline	0.0154264	rs641738
	497	WES_Data1	LILRA4	19	54849942	54849942	G	A	nonsynonymous SNV	p.P27L	c.C80T	R	R	0.2209	0.3882	0.1673	Germline	0.000665191	rs2241384
	498	WES_Data1	GP6	19	55536595	55536595	G	A	nonsynonymous SNV	p.P219S	c.C655T	R	R	0.2778	0.4375	0.1597	Germline	0.024341	rs1613662	COSM3757228
	499	WES_Data1	TMEM150B	19	55824332	55824332	T	G	nonsynonymous SNV	p.L199F	c.A597C	K	K	0.2248	0.3333	0.1085	Germline	0.0429451	rs7246479
	500	WES_Data1	RFPL4A	19	56273285	56273285	A	G	nonsynonymous SNV	p.K40R	c.A119G	A	R	0.1053	0.2119	0.1066	Somatic	0.0148385	rs200422093	COSM148752
	501	WES_Data1	RFPL4A	19	56273293	56273293	G	A	nonsynonymous SNV	p.D43N	c.G127A	G	R	0.1043	0.2133	0.109	Somatic	0.0129219	rs2019946	COSM148753
	502	WES_Data1	NLRP4	19	56369189	56369189	G	A	nonsynonymous SNV	p.A144T	c.G430A	R	R	0.5855	0.7172	0.1317	Germline	0.0118555	rs441827	COSM3757275
	503	WES_Data1	ZNF584	19	58928751	58928751	G	A	nonsynonymous SNV	p.R289Q	c.G866A	R	R	0.5583	0.7098	0.1515	Germline	0.001173	rs35111737
	504	WES_Data1	MAVS	20	3844929	3844929	C	T	nonsynonymous SNV	p.R77C	c.C229T	Y	Y	0.4205	0.6098	0.1893	Germline	0.010198	rs45437096
	505	WES_Data1	SLX4IP	20	10603326	10603326	A	G	nonsynonymous SNV	p.K176E	c.A526G	R	R	0.4138	0.6042	0.1904	Germline	0.0392833	rs73075324
	506	WES_Data1	BPIFB1	20	31897554	31897554	G	C	nonsynonymous SNV	p.S479T	c.G1436C	S	S	0.4394	0.6087	0.1693	Germline	0.0359951	rs1999663
	507	WES_Data1	SNX21	20	44469290	44469290	G	A	nonsynonymous SNV	p.A154T	c.G460A	R	R	0.5833	0.4041	-0.1792	Germline	0.00204576	rs4638862	COSM4001915
	508	WES_Data1	SALL4	20	50407502	50407502	A	C	nonsynonymous SNV	p.L507R	c.T1520G	M	M	0.4432	0.5741	0.1309	Germline	0.0463646	rs6126344	COSM3758635
	509	WES_Data1	COL9A3	20	61448466	61448466	G	A	nonsynonymous SNV	p.G17E	c.G50A	R	A	0.5	0.8235	0.3235	LOH	0.0474231	rs2294984	COSM3766631
	510	WES_Data1	COL9A3	20	61467564	61467564	C	G	nonsynonymous SNV	p.P476R	c.C1427G	S	S	0.4167	0.5508	0.1341	Germline	0.0410219	rs142066316
	511	WES_Data1	PFKL	21	45733867	45733867	A	T	nonsynonymous SNV	p.D237V	c.A710T	W	W	0.2941	0.55	0.2559	Germline	0.023374	rs1057037
	512	WES_Data1	COL6A2	21	47545768	47545768	G	A	nonsynonymous SNV	p.R680H	c.G2039A	R	R	0.4236	0.5428	0.1192	Germline	0.00516749	rs1042917	COSM3758963
	513	WES_Data1	RFPL2	22	32587061	32587061	C	T	nonsynonymous SNV	p.V218M	c.G652A	Y	Y	0.4274	0.5467	0.1193	Germline	0.0349191	rs199688908	COSM5956969
	514	WES_Data1	APOBEC3F	22	39445554	39445554	G	A	nonsynonymous SNV	p.V231I	c.G691A	R	R	0.4776	0.6438	0.1662	Germline	0.0349393	rs2076101	COSM5000606
	515	WES_Data1	CSF2RA	X	1428421	1428421	G	T	nonsynonymous SNV	p.R358L	c.G1073T	K	T	0.4111	0.9767	0.5656	LOH	1.5317e-11	rs28722602	COSM4002268
	516	WES_Data1	SLC25A6	X	1508583	1508583	T	C	nonsynonymous SNV	p.Q50R	c.A149G	Y	C	0.5294	1	0.4706	LOH	4.45998e-06	rs14005	COSM3694400
	517	WES_Data1	AKAP17A	X	1719897	1719897	C	G	nonsynonymous SNV	p.P500A	c.C1498G	S	G	0.5763	0.9722	0.3959	LOH	7.54811e-06	rs28661622
	518	WES_Data1	CD99	X	2656261	2656261	A	G	nonsynonymous SNV	p.M150V	c.A448G	R	G	0.6	1	0.4	LOH	1.88103e-05	rs4793
	519	WES_Data1	CD99	X	2656283	2656283	A	T	nonsynonymous SNV	p.N157I	c.A470T	W	T	0.5556	1	0.4444	LOH	1.95811e-05	rs4717
	520	WES_Data1	FAM47A	X	34148877	34148877	C	G	nonsynonymous SNV	p.E507Q	c.G1519C	C	S	0.1538	0.4231	0.2693	Somatic	0.0321899	rs5973088	COSM1138136
	521	WES_Data1	FAM47A	X	34148882	34148882	C	T	nonsynonymous SNV	p.R505H	c.G1514A	C	Y	0.12	0.3548	0.2348	Somatic	0.0417769	rs5973089	COSM488335
	522	WES_Data1	KCND1	X	48825796	48825796	G	A	nonsynonymous SNV	p.R295C	c.C883T	G	A	0	0.9899	0.9899	Somatic	9.32558e-61	.	COSM1741329
	523	WES_Data1	SPATA21	1	16727305	16727305	#NAME?	CTT	frameshift substitution	p.L362Kfs*22	c.1084delinsAAG	*/+CTT	*/+CTT	0.3333	0.4419	0.1086	Germline	2.62909e-22
	524	WES_Data1	FOXD2	1	47904668	47904668	#NAME?	CCGCAC	frameshift substitution	p.P288Rfs*85	c.861delinsCCGCAC	*/+CCGCAC	*/+CCGCAC	0.4211	0.3	-0.1211	Germline	0.000151948
	525	WES_Data1	AK5	1	78024345	78024345	#NAME?	TAT	frameshift substitution	p.S534Lfs*24	c.1601delinsTAT	*/+TAT	*/+TAT	0.4	0.6452	0.2452	Germline	4.24441e-12
	526	WES_Data1	CELSR2	1	109792735	109792735	#NAME?	CGC	frameshift substitution	p.T12Rfs*68	c.34delinsCGC	#NAME?	#NAME?	0.8462	1	0.1538	Germline	1
	527	WES_Data1	IGSF3	1	117122285	117122285	#NAME?	TCC	frameshift substitution	p.D1021Efs*14	c.3063delinsGGA	*/+TCC	#NAME?	0.7	0.8958	0.1958	LOH	1
	528	WES_Data1	KCNN3	1	154842199	154842199	#NAME?	GCTGCTGCT	frameshift substitution	p.P81Qfs*97	c.242delinsAGCAGCAGC	G	*/+GCTGCTGCT	0	0.3226	0.3226	Somatic	1
	529	WES_Data1	HOXD9	2	176988290	176988290	#NAME?	GCA	frameshift substitution	p.P265Rfs*60	c.794delinsGCA	*/+GCA	*/+GCA	0.3	0.4524	0.1524	Germline	1
	530	WES_Data1	FAM171B	2	187559029	187559029	#NAME?	CAGCAG	frameshift substitution	p.Q43Hfs*35	c.129delinsCAGCAG	*/+CAGCAG	*/+CAGCAG	0.5833	0.7465	0.1632	Germline	8.81261e-32
	531	WES_Data1	FTCDNL1	2	200684249	200684249	#NAME?	A	stoploss	p.X148L	c.A443T	T	*/+A	0.075	0.254	0.179	Somatic	1	.
	532	WES_Data1	USP40	2	234429739	234429739	#NAME?	TTC	frameshift substitution	p.W753Nfs*5	c.2256delinsGAA	*/+TTC	*/+TTC	0.625	0.3902	-0.2348	Germline	4.38998e-14
	533	WES_Data1	ATXN7	3	63898390	63898390	#NAME?	GCC	frameshift substitution	p.Q39Rfs*51	c.116delinsGCC	A	*/+GCC	0.1765	0.3	0.1235	Germline	0.00112558
	534	WES_Data1	MAGI1	3	65425560	65425560	#NAME?	CTG	frameshift substitution	p.T422Qfs*45	c.1264delinsCAG	*/+CTG	*/+CTG	0.4167	0.3103	-0.1064	Germline	2.6625e-07
	535	WES_Data1	MAGEF1	3	184429133	184429133	#NAME?	TCC	frameshift substitution	p.D159Efs*12	c.477delinsGGA	*/+TCC	*/+TCC	0.6667	0.5645	-0.1022	Germline	2.30944e-27
	536	WES_Data1	MAST4	5	65892767	65892767	#NAME?	GCC	frameshift substitution	p.L95Rfs*55	c.284delinsGCC	*/+GCC	*/+GCC	0.3571	0.5	0.1429	Germline	4.25679e-07
	537	WES_Data1	ATXN1	6	16327915	16327915	#NAME?	TGC	frameshift substitution	p.H209Qfs*68	c.627delinsGCA	A	*/+TGC	0	0.6579	0.6579	Somatic	1
	538	WES_Data1	VWA7	6	31740763	31740763	#NAME?	CAGGCTCCATGGGG	frameshift substitution	p.V352Afs*13	c.1055delinsCCCCATGGAGCCTG	*/+CAGGCTCCATGGGG	*/+CAGGCTCCATGGGG	0.3383	0.2146	-0.1237	Germline	2.11841e-31
	539	WES_Data1	PRICKLE4	6	41754573	41754573	#NAME?	CTT	frameshift substitution	p.L288Ffs*68	c.861delinsCTT	*/+CTT	*/+CTT	0.4751	0.2452	-0.2299	Germline	1	.	rs140326303
	540	WES_Data1	PRDM13	6	100061624	100061624	#NAME?	CCG	frameshift substitution	p.P372Rfs*119	c.1113delinsCCG	*/+CCG	*/+CCG	0.3103	0.4444	0.1341	Germline	1.69035e-09
	541	WES_Data1	MAP3K5	6	136913666	136913666	#NAME?	GTC	frameshift substitution	p.T989Dfs*3	c.2965delinsGAC	*/+GTC	*/+GTC	0.4667	0.324	-0.1427	Germline	2.53921e-38
	542	WES_Data1	LFNG	7	2552881	2552881	#NAME?	GATG	nonframeshift substitution	p.T46_D47insM	c.138delinsGATG	*/+GATG	*/+GATG	0.3178	0.2118	-0.106	Germline	1.65849e-20
	543	WES_Data1	VWDE	7	12391268	12391268	#NAME?	A	stopgain	p.K1158X	c.A3472T	*/+A	*/+A	0.5641	0.7037	0.1396	Germline	4.24294e-17	.
	544	WES_Data1	AKAP9	7	91652178	91652178	#NAME?	AAC	frameshift substitution	p.K1335Nfs*9	c.4003delinsAAC	*/+AAC	*/+AAC	0.4918	0.74	0.2482	Germline	1
	545	WES_Data1	LURAP1L	9	12775861	12775861	#NAME?	GGCGGCGGC	frameshift substitution	p.G50Afs*45	c.147delinsGGCGGCGGC	#NAME?	*/+GGCGGCGGC	0.8382	0.6071	-0.2311	Germline	1
	546	WES_Data1	TTLL11	9	124855330	124855330	#NAME?	TGGCCT	frameshift substitution	p.T123Kfs*112	c.368delinsAGGCCA	*/+TGGCCT	*/+TGGCCT	0.5429	0.3846	-0.1583	Germline	2.25965e-11
	547	WES_Data1	OBP2A	9	138441685	138441685	+C	C	nonsynonymous SNV	p.Q194H	c.G582C	*/+C	*/+C	0.2778	0.4167	0.1389	Germline	0.000398507	.
	548	WES_Data1	SKIDA1	10	21805466	21805466	#NAME?	CCTCCT	frameshift substitution	p.G429Efs*118	c.1286delinsAGGAGG	*/+CCTCCT	*/+CCTCCT	0.375	0.6667	0.2917	Germline	1.12421e-05
	549	WES_Data1	KRTAP5-10	11	71276657	71276657	#NAME?	GGCTGTGGCTCCGGCTGTGGG	frameshift substitution	p.G9Afs*214	c.24delinsGGCTGTGGCTCCGGCTGTGGG	*/+GGCTGTGGCTCCGGCTGTGGG	*/+GGCTGTGGCTCCGGCTGTGGG	0.25	0.3659	0.1159	Germline	6.92728e-08
	550	WES_Data1	C12orf56	12	64712546	64712546	#NAME?	GTT	frameshift substitution	p.S235Nfs*2	c.703delinsAAC	*/+GTT	*/+GTT	0.4088	0.5141	0.1053	Germline	4.89503e-48
	551	WES_Data1	GLIPR1L2	12	75816814	75816814	#NAME?	ACA	frameshift substitution	p.D239Tfs*7	c.715delinsACA	*/+ACA	*/+ACA	0.3125	0.5625	0.25	Germline	9.85119e-06
	552	WES_Data1	BRI3BP	12	125478381	125478381	#NAME?	CTG	frameshift substitution	p.L16Cfs*61	c.45delinsCTG	*/+CTG	*/+CTG	0.4167	0.5556	0.1389	Germline	2.91607e-06
	553	WES_Data1	DDHD1	14	53619480	53619480	#NAME?	GCCGCC	frameshift substitution	p.S113Gfs*48	c.337delinsGGCGGC	*/+GCCGCC	*/+GCCGCC	0.7263	0.5652	-0.1611	Germline	4.1779e-50
	554	WES_Data1	IFI27;IFI27	14	94582130	94582130	#NAME?	GGCCATGGC	frameshift substitution	p.V42Gfs*24	c.125delinsGGCCATGGC	*/+GGCCATGGC	*/+GGCCATGGC	0.2778	0.3958	0.118	Germline	9.93662e-11
	555	WES_Data1	GSC	14	95236204	95236204	#NAME?	CGC	frameshift substitution	p.A50Gfs*90	c.149delinsGCG	*/+CGC	*/+CGC	0.4762	0.3721	-0.1041	Germline	1.27178e-13
	556	WES_Data1	GOLGA6L2	15	23685004	23685004	#NAME?	CAT	frameshift substitution	p.A873Dfs*105	c.2618delinsATG	#NAME?	*/+CAT	0.7586	0.6154	-0.1432	Germline	1.37623e-16
	557	WES_Data1	SLC28A1	15	85438311	85438311	#NAME?	TTG	frameshift substitution	p.K141Sfs*16	c.418delinsTTG	*/+TTG	*/+TTG	0.4889	0.36	-0.1289	Germline	4.802e-15
	558	WES_Data1	ZFHX3	16	72821593	72821593	#NAME?	GCC	frameshift substitution	p.S2614Gfs*16	c.7840delinsGGC	*/+GCC	*/+GCC	0.4211	0.2361	-0.185	Germline	1.02529e-14
	559	WES_Data1	FAM187A	17	42981239	42981239	#NAME?	AGT	frameshift substitution	p.L15Vfs*22	c.42delinsAGT	*/+AGT	*/+AGT	0.4	0.5862	0.1862	Germline	2.78099e-14
	560	WES_Data1	TSPOAP1	17	56386607	56386607	#NAME?	TCCTCCTCT	frameshift substitution	p.D1282Efs*60	c.3846delinsAGAGGAGGA	G	*/+TCCTCCTCT	0.1912	0.3151	0.1239	Germline	1.11968e-12
	561	WES_Data1	CCDC40	17	78064145	78064145	#NAME?	CAC	frameshift substitution	p.R1014Hfs*20	c.3040delinsCAC	*/+CAC	*/+CAC	0.4065	0.6894	0.2829	Germline	1
	562	WES_Data1	ZNF816	19	53454475	53454475	#NAME?	ACT	frameshift substitution	p.G185Sfs*40	c.553delinsAGT	*/+ACT	*/+ACT	0.3333	0.2033	-0.13	Germline	2.03268e-21
	563	WES_Data1	ZNF579	19	56089908	56089908	#NAME?	CCG	frameshift substitution	p.Q367Gfs*38	c.1098delinsCGG	*/+CCG	*/+CCG	0.6061	0.7303	0.1242	Germline	1
	564	WES_Data1	GNRH2	20	3026345	3026345	#NAME?	GCCCC	frameshift substitution	p.E109Gfs*11	c.326delinsGCCCC	*/+GCCCC	*/+GCCCC	0.3885	0.2808	-0.1077	Germline	1.98062e-33
	565	WES_Data1	RALY	20	32664864	32664864	#NAME?	CAG	frameshift substitution	p.G215Afs*55	c.641delinsCAG	*/+CAG	*/+CAG	0.5435	0.4355	-0.108	Germline	6.11184e-20
	566	WES_Data1	C21orf58	21	47721985	47721985	#NAME?	TGG	frameshift substitution	p.A194Qfs*99	c.579delinsCCA	*/+TGG	*/+TGG	0.4848	0.6538	0.169	Germline	2.06796e-13
	567	WES_Data1	SHROOM4	X	50350728	50350728	#NAME?	TCC	frameshift substitution	p.E1140Kfs*41	c.3414delinsGGA	*/+TCC	*/+TCC	0.7	0.5714	-0.1286	Germline	4.32579e-05	.	rs143151534
	568	WES_Data1	SHROOM4	X	50350758	50350758	#NAME?	TGCTGCTGCTGT	frameshift substitution	p.K1129Qfs*55	c.3384delinsACAGCAGCAGCA	*/+TGCTGCTGCTGT	*/+TGCTGCTGCTGT	0.4167	0.6667	0.25	Germline	2.00869e-06
	569	WES_Data1	RBMXL3	X	114425181	114425181	#NAME?	GAGGCCGCTCGCCCAACGCCCACAGCG	frameshift substitution	p.R393Efs*122	c.1177delinsGAGGCCGCTCGCCCAACGCCCACAGCG	#NAME?	*/+GAGGCCGCTCGCCCAACGCCCACAGCG	0.8431	0.6714	-0.1717	Germline	5.44089e-40
	570	WES_Data1	RBMX	X	135961585	135961585	#NAME?	T	startloss	p.V2_M40del	c.T2A	A	*/+T	0	0.25	0.25	Somatic	1	.
	571	WES_Data1	ZNF616	19	52619065	52619065	T	C	nonsynonymous SNV	p.H451R	c.A1352G	Y	Y	0.2766	0.3987	0.1221	Germline	0.0175538	rs3764537	COSM4000858
	572	WES_Data2	NPHP4	1	5925304	5925304	G	A	nonsynonymous SNV	p.T713M	c.C2138T	G	R	0.0071	0.45	0.4429	Somatic	1.55997e-19	rs144624477
	573	WES_Data2	TAS1R2	1	19166893	19166893	C	T	nonsynonymous SNV	p.A574T	c.G1720A	Y	Y	0.4466	0.548	0.1014	Germline	0.0302057	rs6662276	COSM4143132
	574	WES_Data2	UBR4	1	19499560	19499560	T	C	nonsynonymous SNV	p.T1107A	c.A3319G	Y	Y	0.4424	0.5763	0.1339	Germline	0.0177722	rs16862578	COSM4778190
	575	WES_Data2	CDA	1	20915701	20915701	A	C	nonsynonymous SNV	p.K27Q	c.A79C	M	M	0.4889	0.6545	0.1656	Germline	0.0375276	rs2072671	COSM3750847
	576	WES_Data2	UBXN11	1	26608828	26608828	G	A	nonsynonymous SNV	p.P389S	c.C1165T	G	R	0.0909	0.4333	0.3424	Somatic	0.00200728	rs1134584	COSM3749046
	577	WES_Data2	ATPIF1	1	28564279	28564279	A	G	nonsynonymous SNV	p.R63G	c.A187G	R	R	0.3333	0.5294	0.1961	Germline	0.0468557	rs9508
	578	WES_Data2	SRSF4	1	29475648	29475648	T	G	nonsynonymous SNV	p.E253D	c.A759C	K	K	0.6579	0.303	-0.3549	Germline	0.00282275	rs2230679	COSM3997475
	579	WES_Data2	ERMAP	1	43296195	43296195	C	T	nonsynonymous SNV	p.H26Y	c.C76T	Y	Y	0.4348	0.6364	0.2016	Germline	0.00945137	rs33953680
	580	WES_Data2	MROH7	1	55119515	55119515	T	G	nonsynonymous SNV	p.Y306D	c.T916G	K	K	0.5521	0.4142	-0.1379	Germline	0.000852287	rs1655519	COSM3997591
	581	WES_Data2	MROH7	1	55136529	55136529	T	C	nonsynonymous SNV	p.V27A	c.T80C	Y	C	0.3415	0.75	0.4085	LOH	0.000877268	rs480963	COSM4144099
	582	WES_Data2	COL24A1	1	86488232	86488232	G	A	nonsynonymous SNV	p.P31S	c.C91T	R	R	0.3333	0.52	0.1867	Germline	0.0319422	rs641712	COSM3751421
	583	WES_Data2	SLC44A3	1	95330372	95330372	G	A	nonsynonymous SNV	p.V402I	c.G1204A	R	R	0.3919	0.5443	0.1524	Germline	0.0420385	rs859098	COSM4165352
	584	WES_Data2	CHIA	1	111861974	111861974	T	C	nonsynonymous SNV	p.F193S	c.T578C	Y	Y	0.4483	0.5619	0.1136	Germline	0.0498486	rs2275254	COSM3996745
	585	WES_Data2	NBPF15	1	148582481	148582481	A	G	nonsynonymous SNV	p.T239A	c.A715G	A	R	0.125	0.25	0.125	Somatic	0.0453127	rs202133347
	586	WES_Data2	OR10T2	1	158369064	158369064	A	G	nonsynonymous SNV	p.F65L	c.T193C	R	R	0.5414	0.3443	-0.1971	Germline	0.000755518	rs41488350	COSM3750473
	587	WES_Data2	DCAF6	1	168013850	168013850	T	C	nonsynonymous SNV	p.V400A	c.T1199C	Y	Y	0.4	0.6522	0.2522	Germline	0.00976936	rs11558511	COSM3750561
	588	WES_Data2	SELP	1	169566313	169566313	C	T	nonsynonymous SNV	p.D603N	c.G1807A	Y	Y	0.4622	0.5904	0.1282	Germline	0.0492632	rs6127
	589	WES_Data2	FMO1	1	171227216	171227216	T	C	startloss	p.Q2_M5del	c.T2C	Y	Y	0.4151	0.5541	0.139	Germline	0.00552393	rs10912675
	590	WES_Data2	LAMC1	1	183085755	183085755	A	G	nonsynonymous SNV	p.I458V	c.A1372G	R	R	0.4125	0.5714	0.1589	Germline	0.049181	rs20563	COSM4417188
	591	WES_Data2	LAMC2	1	183201970	183201970	G	C	nonsynonymous SNV	p.S733T	c.G2198C	S	S	0.4106	0.5268	0.1162	Germline	0.0405321	rs2296303
	592	WES_Data2	RNPEP	1	201973565	201973565	G	A	nonsynonymous SNV	p.V289I	c.G865A	R	R	0.3953	0.5735	0.1782	Germline	0.02072	rs3820439	COSM3750764
	593	WES_Data2	TRAF3IP3	1	209950760	209950760	C	G	nonsynonymous SNV	p.Q109E	c.C325G	S	S	0.4263	0.5547	0.1284	Germline	0.0164165	rs669694	COSM1127153
	594	WES_Data2	CENPF	1	214814733	214814733	T	G	nonsynonymous SNV	p.Y1018D	c.T3052G	K	K	0.2333	0.5484	0.3151	Germline	0.0115238	rs3795519	COSM3997217
	595	WES_Data2	OBSCN	1	228559994	228559994	C	T	nonsynonymous SNV	p.A7172V	c.C21515T	Y	Y	0.4278	0.5315	0.1037	Germline	0.0407384	rs500049	COSM425535
	596	WES_Data2	DISC1	1	232144598	232144598	A	T	nonsynonymous SNV	p.S582C	c.A1744T	W	W	0.4545	0.5556	0.1011	Germline	0.0252792	rs821616	COSM3750992
	597	WES_Data2	ARID4B	1	235345346	235345346	C	T	nonsynonymous SNV	p.G877E	c.G2630A	Y	Y	0.4343	0.573	0.1387	Germline	0.039675	rs61730876	COSM3751011
	598	WES_Data2	CGREF1	2	27324354	27324354	C	T	nonsynonymous SNV	p.E249K	c.G745A	C	Y	0	0.4118	0.4118	Somatic	0.000180902	rs1057391	COSM5031267
	599	WES_Data2	FIGLA	2	71012734	71012734	C	G	nonsynonymous SNV	p.S141T	c.G422C	S	S	0.3763	0.566	0.1897	Germline	0.0204749	rs7566476	COSM3758330
	600	WES_Data2	CD207	2	71060111	71060111	G	A	nonsynonymous SNV	p.P213S	c.C637T	R	R	0.4429	0.6271	0.1842	Germline	0.0277212	rs17006436
	601	WES_Data2	ATP6V1B1	2	71163173	71163173	C	T	nonsynonymous SNV	p.T30I	c.C89T	Y	Y	0.363	0.4919	0.1289	Germline	0.0219909	rs17720303	COSM4001733
	602	WES_Data2	RAB11FIP5	2	73339775	73339775	G	A	nonsynonymous SNV	p.A44V	c.C131T	G	R	0	0.4118	0.4118	Somatic	1.36617e-17	.
	603	WES_Data2	ALMS1	2	73675669	73675669	T	G	nonsynonymous SNV	p.V671G	c.T2012G	K	K	0.4419	0.5625	0.1206	Germline	0.0488233	rs2037814	COSM5426232
	604	WES_Data2	SFTPB	2	85893741	85893741	G	A	nonsynonymous SNV	p.T143I	c.C428T	R	R	0.4701	0.5826	0.1125	Germline	0.00960758	rs1130866	COSM4133962
	605	WES_Data2	POLR1A	2	86317012	86317012	C	G	nonsynonymous SNV	p.R158P	c.G473C	S	S	0.3922	0.5968	0.2046	Germline	0.0238511	rs146078741
	606	WES_Data2	LONRF2	2	100915772	100915772	A	G	nonsynonymous SNV	p.L426P	c.T1277C	R	R	0.4507	0.6226	0.1719	Germline	0.0428926	rs4851287
	607	WES_Data2	IL1RL2	2	102851708	102851708	T	C	nonsynonymous SNV	p.L408P	c.T1223C	Y	Y	0.635	0.4364	-0.1986	Germline	0.00137758	rs2302612	COSM3757543
	608	WES_Data2	POTEF	2	130832185	130832185	G	A	nonsynonymous SNV	p.R954W	c.C2860T	R	A	0.6854	0.8806	0.1952	LOH	0.00314838	rs62165870	COSM441116
	609	WES_Data2	CCDC74B	2	130897234	130897234	C	T	nonsynonymous SNV	p.R280H	c.G839A	Y	Y	0.4412	0.5545	0.1133	Germline	0.01147	rs3177472	COSM4998055
	610	WES_Data2	R3HDM1	2	136393658	136393658	A	G	nonsynonymous SNV	p.M214V	c.A640G	R	R	0.3191	0.6327	0.3136	Germline	0.00193593	rs961360	COSM3757643
	611	WES_Data2	BAZ2B	2	160193992	160193992	C	T	nonsynonymous SNV	p.V1862I	c.G5584A	Y	Y	0.4783	0.6212	0.1429	Germline	0.0442185	rs7559010	COSN15303747
	612	WES_Data2	LY75;LY75-CD302	2	160673519	160673519	G	A	nonsynonymous SNV	p.T1393I	c.C4178T	R	R	0.48	0.6923	0.2123	Germline	0.0359028	rs35941588	COSM5021330
	613	WES_Data2	PLA2R1	2	160885442	160885442	T	C	nonsynonymous SNV	p.M292V	c.A874G	Y	Y	0.3522	0.4731	0.1209	Germline	0.0394961	rs3749117	COSM3757708
	614	WES_Data2	SCN2A	2	166179958	166179958	C	A	nonsynonymous SNV	p.S655Y	c.C1964A	C	M	0	0.3952	0.3952	Somatic	6.87076e-20	.
	615	WES_Data2	ABCB11	2	169830328	169830328	A	G	nonsynonymous SNV	p.V444A	c.T1331C	R	R	0.4074	0.5692	0.1618	Germline	0.0375172	rs2287622	COSM4415006
	616	WES_Data2	MYO3B	2	171239644	171239644	G	T	nonsynonymous SNV	p.G377V	c.G1130T	K	K	0.375	0.7037	0.3287	Germline	0.00801094	.
	617	WES_Data2	TTN	2	179545859	179545859	C	T	nonsynonymous SNV	p.R9852H	c.G29555A	Y	Y	0.4138	0.6	0.1862	Germline	0.0152635	rs36051007	COSM4001412
	618	WES_Data2	MSTN	2	190925077	190925077	T	C	nonsynonymous SNV	p.K153R	c.A458G	Y	Y	0.4048	0.6415	0.2367	Germline	0.018056	rs1805086	COSM4985044
	619	WES_Data2	NEMP2	2	191399378	191399378	C	G	nonsynonymous SNV	p.G2R	c.G4C	S	S	0.2727	0.5909	0.3182	Germline	0.0332925	rs13412879	COSM4133342
	620	WES_Data2	PRSS56	2	233385396	233385396	G	A	nonsynonymous SNV	p.A30T	c.G88A	R	R	0.4444	0.6145	0.1701	Germline	0.0251458	rs1550094	COSN15633779
	621	WES_Data2	UGT1A3	2	234637912	234637912	T	C	nonsynonymous SNV	p.V47A	c.T140C	Y	Y	0.575	0.3291	-0.2459	Germline	0.000531789	rs6431625
	622	WES_Data2	HJURP	2	234750542	234750542	G	C	nonsynonymous SNV	p.S210C	c.C629G	S	S	0.4274	0.5588	0.1314	Germline	0.0332972	rs3732215	COSM1178465
	623	WES_Data2	KLHL30	2	239050033	239050033	C	T	nonsynonymous SNV	p.A213V	c.C638T	Y	Y	0.4434	0.5722	0.1288	Germline	0.00584588	rs12692216	COSM3749643
	624	WES_Data2	TRANK1	3	36897812	36897812	T	C	nonsynonymous SNV	p.E1090G	c.A3269G	Y	Y	0.3882	0.5541	0.1659	Germline	0.0265774	rs11712950
	625	WES_Data2	PLCD1	3	38052804	38052804	C	T	nonsynonymous SNV	p.D252N	c.G754A	Y	Y	0.4118	0.625	0.2132	Germline	0.0349742	rs61755441	COSM3760060
	626	WES_Data2	TOPAZ1	3	44284584	44284584	G	A	nonsynonymous SNV	p.V196I	c.G586A	R	R	0.3019	0.5429	0.241	Germline	0.0208731	rs9284879	COSM446532
	627	WES_Data2	CDCP1	3	45130609	45130609	G	A	nonsynonymous SNV	p.A673V	c.C2018T	R	R	0.3855	0.5574	0.1719	Germline	0.0302669	rs35428731
	628	WES_Data2	STAB1	3	52548799	52548799	C	T	nonsynonymous SNV	p.T1254M	c.C3761T	C	Y	0.0079	0.4948	0.4869	Somatic	2.53058e-20	rs750314449	COSM5124747
	629	WES_Data2	CHDH	3	53857917	53857917	T	G	nonsynonymous SNV	p.E40A	c.A119C	K	K	0.4267	0.6	0.1733	Germline	0.0428429	rs9001	COSM4984900
	630	WES_Data2	CACNA2D3	3	54925426	54925426	C	T	nonsynonymous SNV	p.T732M	c.C2195T	Y	Y	0.4545	0.6389	0.1844	Germline	0.0224045	rs112362995
	631	WES_Data2	SUCLG2	3	67411103	67411103	C	T	nonsynonymous SNV	p.V425I	c.G1273A	Y	Y	0.3333	0.6	0.2667	Germline	0.020465	rs902320
	632	WES_Data2	SUCLG2	3	67411166	67411166	A	G	nonsynonymous SNV	p.Y404H	c.T1210C	R	R	0.25	0.6667	0.4167	Germline	0.00308179	rs902321	COSM3824580
	633	WES_Data2	GPR156	3	119886776	119886776	T	A	nonsynonymous SNV	p.E512D	c.A1536T	W	W	0.4276	0.551	0.1234	Germline	0.0392465	rs902790	COSM4157159
	634	WES_Data2	ASTE1;ATP2C1	3	130735024	130735024	A	T	nonsynonymous SNV	p.L558Q	c.T1673A	A	W	0	0.4296	0.4296	Somatic	8.22868e-30	.
	635	WES_Data2	CEP70	3	138289221	138289221	C	T	nonsynonymous SNV	p.S115N	c.G344A	Y	Y	0.3571	0.6471	0.29	Germline	0.0068808	rs1673607
	636	WES_Data2	CLSTN2	3	140167508	140167508	G	A	nonsynonymous SNV	p.R312Q	c.G935A	R	R	0.3926	0.5096	0.117	Germline	0.0399613	rs148820533	COSM3124419
	637	WES_Data2	PCOLCE2	3	142567281	142567281	G	A	stopgain	p.R76X	c.C226T	G	R	0	0.4787	0.4787	Somatic	4.47854e-20	rs373201044
	638	WES_Data2	SI	3	164793758	164793758	C	A	nonsynonymous SNV	p.V15F	c.G43T	M	M	0.3667	0.6364	0.2697	Germline	0.0498997	rs9290264	COSM5829615
	639	WES_Data2	MUC4	3	195509212	195509212	G	A	nonsynonymous SNV	p.S3080L	c.C9239T	R	A	0.7181	0.8433	0.1252	LOH	0.00818973	rs200749420	COSM3847116
	640	WES_Data2	MUC4	3	195509365	195509365	C	T	nonsynonymous SNV	p.S3029N	c.G9086A	C	Y	0.0882	0.2857	0.1975	Somatic	0.0352503	rs200717698	COSM4322288
	641	WES_Data2	FGFRL1	4	1018705	1018705	C	A	nonsynonymous SNV	p.P362Q	c.C1085A	M	M	0.4355	0.6429	0.2074	Germline	0.0298831	rs4647930	COSM3749847
	642	WES_Data2	CRIPAK	4	1389156	1389156	T	C	nonsynonymous SNV	p.M286T	c.T857C	Y	Y	0.4062	0.5283	0.1221	Germline	0.0147479	rs71614972	COSM1567003
	643	WES_Data2	DOK7	4	3495095	3495095	G	A	nonsynonymous SNV	p.G151D	c.G452A	R	R	0.5463	0.3176	-0.2287	Germline	0.00116608	rs9684786	COSM3760593
	644	WES_Data2	SLC2A9	4	9909923	9909923	G	A	nonsynonymous SNV	p.P350L	c.C1049T	R	R	0.414	0.5254	0.1114	Germline	0.0373435	rs2280205	COSM4999531
	645	WES_Data2	SPARCL1	4	88415636	88415636	G	C	nonsynonymous SNV	p.H106D	c.C316G	S	S	0.3889	0.5778	0.1889	Germline	0.0470733	rs1049544	COSM149708
	646	WES_Data2	LRIT3	4	110790911	110790911	A	T	nonsynonymous SNV	p.M336L	c.A1006T	W	W	0.3871	0.5747	0.1876	Germline	0.00880532	rs764205	COSM1131303
	647	WES_Data2	PABPC4L	4	135121183	135121183	C	T	nonsynonymous SNV	p.S389N	c.G1166A	Y	Y	0.3835	0.5217	0.1382	Germline	0.0275999	rs6830036
	648	WES_Data2	POU4F2	4	147561147	147561147	C	A	nonsynonymous SNV	p.D139E	c.C417A	M	M	0.4412	0.6333	0.1921	Germline	0.0226839	rs147517729
	649	WES_Data2	TLL1	4	167020644	167020644	A	G	nonsynonymous SNV	p.T958A	c.A2872G	R	R	0.4469	0.5655	0.1186	Germline	0.017793	rs2291822	COSM4002988
	650	WES_Data2	DDX60L	4	169282355	169282355	T	C	nonsynonymous SNV	p.M1646V	c.A4936G	Y	C	0.3846	0.8462	0.4616	LOH	0.0207027	rs2684348	COSM4005705
	651	WES_Data2	AHRR	5	434722	434722	G	C	nonsynonymous SNV	p.D627H	c.G1879C	S	S	0.2297	0.4044	0.1747	Germline	0.000123205	rs34453673	COSM1437716
	652	WES_Data2	CEP72	5	639231	639231	C	A	nonsynonymous SNV	p.P412T	c.C1234A	M	M	0.2182	0.4744	0.2562	Germline	5.7084e-05	rs12522955	COSM4159929
	653	WES_Data2	SLC6A19	5	1216768	1216768	G	A	nonsynonymous SNV	p.R328H	c.G983A	R	R	0.2214	0.3826	0.1612	Germline	1.61398e-09	rs552867213
	654	WES_Data2	MRPL36	5	1799001	1799001	T	G	nonsynonymous SNV	p.S17R	c.A49C	K	K	0.7173	0.507	-0.2103	Germline	0.00131575	rs114776273
	655	WES_Data2	IRX4	5	1880891	1880891	C	T	nonsynonymous SNV	p.A119T	c.G355A	Y	Y	0.7449	0.4839	-0.261	Germline	6.58234e-07	rs2232376
	656	WES_Data2	MTRR	5	7878424	7878424	T	A	nonsynonymous SNV	p.S257T	c.T769A	A	W	0.7614	0.5769	-0.1845	Germline	0.00223584	rs2303080
	657	WES_Data2	MTRR	5	7889304	7889304	C	T	nonsynonymous SNV	p.R415C	c.C1243T	T	Y	0.7624	0.5667	-0.1957	Germline	0.000706317	rs2287780
	658	WES_Data2	MTRR	5	7897191	7897191	C	T	nonsynonymous SNV	p.H595Y	c.C1783T	Y	Y	0.2157	0.4667	0.251	Germline	1.69512e-05	rs10380	COSM4987412
	659	WES_Data2	DNAH5	5	13900321	13900321	G	T	nonsynonymous SNV	p.N751K	c.C2253A	K	K	0.728	0.48	-0.248	Germline	0.00180685	rs115004914
	660	WES_Data2	DNAH5	5	13931340	13931340	C	T	nonsynonymous SNV	p.G24E	c.G71A	C	Y	0.1963	0.46	0.2637	Somatic	0.000731731	rs1530496	COSM5002056
	661	WES_Data2	DNAH5	5	13944512	13944512	A	C	nonsynonymous SNV	p.H12Q	c.T36G	M	M	0.21	0.3488	0.1388	Germline	0.0107513	rs339445
	662	WES_Data2	FAM105A	5	14610309	14610309	C	G	nonsynonymous SNV	p.F319L	c.C957G	C	S	0.1625	0.4375	0.275	Somatic	0.00295174	rs16903574	COSM5001962
	663	WES_Data2	MYO10	5	16670904	16670904	T	C	nonsynonymous SNV	p.T1872A	c.A5614G	Y	Y	0.7213	0.5517	-0.1696	Germline	1.33861e-06	rs757513041
	664	WES_Data2	MYO10	5	16711087	16711087	C	T	nonsynonymous SNV	p.R700Q	c.G2099A	Y	Y	0.6898	0.5044	-0.1854	Germline	1.86478e-06	rs26740
	665	WES_Data2	MYO10	5	16769273	16769273	G	A	nonsynonymous SNV	p.R324W	c.C970T	G	R	0.1842	0.449	0.2648	Somatic	2.55264e-06	rs11750538	COSM3761089
	666	WES_Data2	CDH12	5	22078584	22078584	C	T	nonsynonymous SNV	p.V68M	c.G202A	T	Y	0.7581	0.5065	-0.2516	Germline	7.62801e-05	rs4371716	COSM3761190
	667	WES_Data2	CDH9	5	26988328	26988328	G	A	nonsynonymous SNV	p.A38V	c.C113T	A	R	0.7738	0.5	-0.2738	Germline	0.00234987	rs2288466	COSM3761195
	668	WES_Data2	CDH9	5	26988424	26988424	T	C	nonsynonymous SNV	p.Y6C	c.A17G	Y	Y	0.7416	0.3415	-0.4001	Germline	1.66962e-05	rs2288467	COSM5009599
	669	WES_Data2	ZFR	5	32400266	32400266	A	G	nonsynonymous SNV	p.I520T	c.T1559C	R	R	0.7211	0.4949	-0.2262	Germline	6.15071e-05	rs1051489	COSM3761199
	670	WES_Data2	ADAMTS12	5	33535060	33535060	G	A	nonsynonymous SNV	p.T1410I	c.C4229T	R	R	0.2459	0.507	0.2611	Germline	0.000224491	rs25754	COSM4003504
	671	WES_Data2	RAI14	5	34824555	34824555	G	T	nonsynonymous SNV	p.A841S	c.G2521T	K	K	0.2843	0.5319	0.2476	Germline	0.00329598	rs1048944	COSM3761207
	672	WES_Data2	TTC23L	5	34840841	34840841	A	G	nonsynonymous SNV	p.H31R	c.A92G	R	R	0.2627	0.4255	0.1628	Germline	0.0330667	rs6451173	COSM4003509
	673	WES_Data2	DNAJC21	5	34954770	34954770	A	G	nonsynonymous SNV	p.N516S	c.A1547G	R	R	0.2078	0.48	0.2722	Germline	8.60936e-07	rs35999194
	674	WES_Data2	PRLR	5	35072712	35072712	T	G	nonsynonymous SNV	p.I69L	c.A205C	K	K	0.2447	0.4225	0.1778	Germline	0.00453369	rs72478580
	675	WES_Data2	PRLR	5	35084647	35084647	T	C	nonsynonymous SNV	p.I100V	c.A298G	Y	Y	0.7405	0.4227	-0.3178	Germline	3.0911e-08	rs2228482	COSM4003512
	676	WES_Data2	SPEF2	5	35709095	35709095	C	T	nonsynonymous SNV	p.A904V	c.C2711T	Y	Y	0.2292	0.4483	0.2191	Germline	0.0214539	rs13170082	COSM3761216
	677	WES_Data2	SPEF2	5	35709184	35709184	G	C	nonsynonymous SNV	p.A934P	c.G2800C	G	S	0.1379	0.5357	0.3978	Somatic	5.23794e-05	rs13170390	COSM3761217
	678	WES_Data2	IL7R	5	35876251	35876251	A	C	nonsynonymous SNV	p.N348T	c.A1043C	M	M	0.2424	0.5083	0.2659	Germline	3.37017e-07	rs41270321	COSM5020970
	679	WES_Data2	IL7R	5	35876274	35876274	A	G	nonsynonymous SNV	p.I356V	c.A1066G	R	R	0.7374	0.4701	-0.2673	Germline	4.04643e-07	rs3194051	COSM5904807
	680	WES_Data2	UGT3A1	5	35962984	35962984	A	G	nonsynonymous SNV	p.W251R	c.T751C	R	R	0.7	0.5562	-0.1438	Germline	0.000816311	rs1070895
	681	WES_Data2	LMBRD2	5	36105254	36105254	C	T	nonsynonymous SNV	p.R648Q	c.G1943A	Y	Y	0.236	0.3873	0.1513	Germline	0.000663141	rs139248479	COSM4698205
	682	WES_Data2	C5orf42	5	37173930	37173930	A	C	nonsynonymous SNV	p.F2033C	c.T6098G	M	M	0.7143	0.4809	-0.2334	Germline	7.27843e-06	rs10076911	COSM1437344
	683	WES_Data2	C5orf42	5	37182902	37182902	G	A	nonsynonymous SNV	p.P1794L	c.C5381T	R	R	0.7288	0.4107	-0.3181	Germline	5.6808e-05	rs75589774	COSM3761222
	684	WES_Data2	C5orf42	5	37231146	37231146	T	A	nonsynonymous SNV	p.Y315F	c.A944T	W	W	0.2381	0.4773	0.2392	Germline	0.0056737	.
	685	WES_Data2	EGFLAM	5	38412674	38412674	C	T	nonsynonymous SNV	p.T239M	c.C716T	Y	Y	0.243	0.3988	0.1558	Germline	0.000253095	rs16903965	COSM4003520
	686	WES_Data2	RICTOR	5	38955796	38955796	G	A	nonsynonymous SNV	p.S837F	c.C2510T	R	R	0.2891	0.4792	0.1901	Germline	0.0150629	rs2043112	COSM4003526
	687	WES_Data2	GHR	5	42719239	42719239	A	C	nonsynonymous SNV	p.I522L	c.A1564C	M	M	0.7346	0.4622	-0.2724	Germline	1.40856e-07	rs6180	COSM3761233
	688	WES_Data2	ANXA2R	5	43039793	43039793	T	C	nonsynonymous SNV	p.Q119R	c.A356G	Y	Y	0.7484	0.5782	-0.1702	Germline	7.97924e-06	rs1054428	COSM3761234
	689	WES_Data2	MRPS30	5	44809162	44809162	G	C	nonsynonymous SNV	p.C33S	c.G98C	C	S	0.7598	0.5561	-0.2037	Germline	8.29314e-07	rs3747479
	690	WES_Data2	ARHGEF28	5	73218954	73218954	C	T	nonsynonymous SNV	p.P1664L	c.C4991T	Y	Y	0.3906	0.5	0.1094	Germline	0.0294759	rs423333
	691	WES_Data2	GIN1	5	102433409	102433409	G	A	nonsynonymous SNV	p.T92M	c.C275T	R	R	0.4419	0.6029	0.161	Germline	0.0338959	rs34813	COSM149894
	692	WES_Data2	PCDHB4	5	140503237	140503237	A	G	nonsynonymous SNV	p.T553A	c.A1657G	R	R	0.3509	0.5472	0.1963	Germline	0.0299971	rs246669	COSM3760980
	693	WES_Data2	ARHGEF37	5	149006640	149006640	C	T	nonsynonymous SNV	p.P489L	c.C1466T	Y	Y	0.4417	0.55	0.1083	Germline	0.0463453	rs9324624	COSM3761026
	694	WES_Data2	RARS	5	167913510	167913510	G	A	nonsynonymous SNV	p.V3I	c.G7A	R	R	0.3846	0.5192	0.1346	Germline	0.034926	rs244903	COSM3761094
	695	WES_Data2	LOC101928093	5	172189304	172189304	G	C	nonsynonymous SNV	p.W60C	c.G180C	S	S	0.4454	0.5926	0.1472	Germline	0.0184756	rs322356
	696	WES_Data2	ZNF454	5	178391860	178391860	G	A	nonsynonymous SNV	p.C152Y	c.G455A	R	R	0.4557	0.5591	0.1034	Germline	0.0219335	rs6867221	COSM3761146
	697	WES_Data2	SERPINB6	6	2955802	2955802	T	C	nonsynonymous SNV	p.M104V	c.A310G	C	Y	1	0.5849	-0.4151	Germline	9.06256e-06	rs2295769	COSM4160492
	698	WES_Data2	NQO2	6	3010298	3010298	A	G	nonsynonymous SNV	p.K16R	c.A47G	A	R	0	0.3287	0.3287	Somatic	2.64976e-09	rs28383623
	699	WES_Data2	PRPF4B	6	4031998	4031998	A	G	nonsynonymous SNV	p.I83V	c.A247G	A	R	0	0.2597	0.2597	Somatic	0.000933233	rs9503893
	700	WES_Data2	F13A1	6	6318795	6318795	C	A	nonsynonymous SNV	p.V35L	c.G103T	A	M	1	0.6494	-0.3506	Germline	3.89733e-07	rs5985	COSM3762153
	701	WES_Data2	RREB1	6	7211818	7211818	G	A	nonsynonymous SNV	p.G195R	c.G583A	G	R	0	0.3534	0.3534	Somatic	4.60274e-10	rs1334576	COSM3762172
	702	WES_Data2	RREB1	6	7230680	7230680	G	T	nonsynonymous SNV	p.G783V	c.G2348T	G	K	0	0.3716	0.3716	Somatic	1.01833e-36	rs9502564	COSM4908590
	703	WES_Data2	RREB1	6	7231843	7231843	G	A	nonsynonymous SNV	p.D1171N	c.G3511A	A	R	1	0.6386	-0.3614	Germline	1.38904e-17	rs9379084	COSM1742059
	704	WES_Data2	RREB1	6	7246998	7246998	G	A	nonsynonymous SNV	p.G1384R	c.G4150A	G	R	0	0.2711	0.2711	Somatic	6.19266e-12	rs2281833	COSM1487903
	705	WES_Data2	RREB1	6	7247248	7247248	T	C	nonsynonymous SNV	p.L1467P	c.T4400C	T	Y	0	0.4114	0.4114	Somatic	3.07579e-14	rs2256596
	706	WES_Data2	C6orf52	6	10687746	10687746	G	T	nonsynonymous SNV	p.A13D	c.C38A	K	K	0.3205	0.6091	0.2886	Germline	2.55941e-06	rs7749306
	707	WES_Data2	PAK1IP1	6	10709632	10709632	G	A	nonsynonymous SNV	p.V376I	c.G1126A	R	R	0.6786	0.2222	-0.4564	Germline	0.00289786	rs72821574
	708	WES_Data2	SYCP2L	6	10898308	10898308	C	T	nonsynonymous SNV	p.S134L	c.C401T	Y	Y	0.3333	0.596	0.2627	Germline	7.60285e-05	rs189323193
	709	WES_Data2	HIVEP1	6	12123249	12123249	A	G	nonsynonymous SNV	p.N1074S	c.A3221G	R	R	0.6456	0.2171	-0.4285	Germline	4.05195e-17	rs2228220	COSM4003670
	710	WES_Data2	HIVEP1	6	12125772	12125772	A	G	nonsynonymous SNV	p.Q1915R	c.A5744G	R	R	0.7064	0.2442	-0.4622	Germline	8.72458e-11	rs1126472	COSM4003671
	711	WES_Data2	EDN1	6	12296255	12296255	G	T	nonsynonymous SNV	p.K197N	c.G591T	K	K	0.5538	0.2124	-0.3414	Germline	4.62432e-12	rs5370	COSM150053
	712	WES_Data2	TBC1D7	6	13321097	13321097	G	A	nonsynonymous SNV	p.R115C	c.C343T	R	R	0.3269	0.6	0.2731	Germline	3.87364e-06	rs2496132	COSN18731302
	713	WES_Data2	MYLIP	6	16145325	16145325	A	G	nonsynonymous SNV	p.N342S	c.A1025G	R	R	0.321	0.6957	0.3747	Germline	2.72088e-14	rs9370867	COSM4999246
	714	WES_Data2	NUP153	6	17665479	17665479	G	C	nonsynonymous SNV	p.N402K	c.C1206G	S	S	0.6289	0.3649	-0.264	Germline	0.000513867	rs6906499	COSM3761704
	715	WES_Data2	NUP153	6	17675246	17675246	T	C	nonsynonymous SNV	p.I248V	c.A742G	Y	Y	0.5755	0.3333	-0.2422	Germline	0.00103545	rs2228375	COSM4783709
	716	WES_Data2	NRSN1	6	24145896	24145896	C	T	nonsynonymous SNV	p.H104Y	c.C310T	Y	Y	0.3004	0.6739	0.3735	Germline	1.68879e-17	rs11544636
	717	WES_Data2	DCDC2	6	24291203	24291203	T	C	nonsynonymous SNV	p.S221G	c.A661G	Y	Y	0.6875	0.2925	-0.395	Germline	4.00174e-09	rs2274305	COSM3761724
	718	WES_Data2	GPLD1	6	24489652	24489652	C	T	nonsynonymous SNV	p.V30I	c.G88A	Y	Y	0.7167	0.2963	-0.4204	Germline	7.64089e-14	rs1126617	COSM4003824
	719	WES_Data2	GPLD1	6	24489691	24489691	G	C	nonsynonymous SNV	p.L17V	c.C49G	S	S	0.2606	0.6957	0.4351	Germline	3.59031e-13	rs2235501	COSM4003825
	720	WES_Data2	GPLD1	6	24489733	24489733	C	G	nonsynonymous SNV	p.A3P	c.G7C	S	S	0.2569	0.7283	0.4714	Germline	7.56268e-13	rs116789689
	721	WES_Data2	RIPOR2	6	24828490	24828490	C	T	nonsynonymous SNV	p.R847Q	c.G2540A	Y	Y	0.6445	0.2663	-0.3782	Germline	1.09947e-13	rs9461073	COSM3774194
	722	WES_Data2	SLC17A4	6	25776949	25776949	G	A	nonsynonymous SNV	p.A372T	c.G1114A	R	R	0.6777	0.343	-0.3347	Germline	9.34625e-13	rs11754288	COSM5654058
	723	WES_Data2	SLC17A1	6	25813150	25813150	G	A	nonsynonymous SNV	p.T269I	c.C806T	R	R	0.3	0.6549	0.3549	Germline	5.1617e-09	rs1165196
	724	WES_Data2	SLC17A3	6	25850845	25850845	C	T	nonsynonymous SNV	p.G201R	c.G601A	Y	Y	0.2874	0.6222	0.3348	Germline	1.51314e-07	rs56027330	COSM3761730
	725	WES_Data2	SLC17A3	6	25862466	25862466	C	T	nonsynonymous SNV	p.A100T	c.G298A	Y	Y	0.3173	0.6164	0.2991	Germline	1.96636e-08	rs1165165	COSM3761732
	726	WES_Data2	HFE	6	26091185	26091185	A	T	nonsynonymous SNV	p.S65C	c.A193T	W	W	0.3119	0.6745	0.3626	Germline	1.70996e-18	rs1800730
	727	WES_Data2	HIST1H1T	6	26108168	26108168	G	A	nonsynonymous SNV	p.L52F	c.C154T	R	R	0.3313	0.674	0.3427	Germline	1.60983e-23	rs2051542	COSM3761741
	728	WES_Data2	HIST1H1T	6	26108282	26108282	C	G	nonsynonymous SNV	p.V14L	c.G40C	S	S	0.6961	0.3134	-0.3827	Germline	4.68563e-17	rs198844	COSM3761742
	729	WES_Data2	HIST1H2BE	6	26184102	26184102	G	A	nonsynonymous SNV	p.G27S	c.G79A	R	R	0.2653	0.625	0.3597	Germline	1.15828e-13	rs7766641
	730	WES_Data2	BTN3A3	6	26451969	26451969	T	C	nonsynonymous SNV	p.V152A	c.T455C	Y	Y	0.3136	0.6459	0.3323	Germline	4.48189e-23	rs114347679
	731	WES_Data2	POM121L2	6	27279852	27279852	T	C	nonsynonymous SNV	p.Q33R	c.A98G	Y	Y	0.3593	0.6575	0.2982	Germline	1.0625e-07	rs2235233
	732	WES_Data2	ZNF391	6	27368898	27368898	A	C	nonsynonymous SNV	p.E250A	c.A749C	M	M	0.7288	0.3837	-0.3451	Germline	7.27681e-07	rs202046742
	733	WES_Data2	ZNF184	6	27425185	27425185	C	A	nonsynonymous SNV	p.A27S	c.G79T	M	M	0.6296	0.2769	-0.3527	Germline	5.97209e-09	rs1883216	COSM5983449
	734	WES_Data2	UBD	6	29523676	29523676	C	G	nonsynonymous SNV	p.C160S	c.G479C	S	S	0.3636	0.7015	0.3379	Germline	1.64117e-05	rs8337
	735	WES_Data2	MOG	6	29627222	29627222	C	A	nonsynonymous SNV	p.P72H	c.C215A	M	M	0.3383	0.6667	0.3284	Germline	2.94586e-18	rs138169338	COSM228993
	736	WES_Data2	MOG	6	29634012	29634012	A	G	nonsynonymous SNV	p.I58V	c.A172G	R	R	0.3025	0.6163	0.3138	Germline	6.85331e-06	rs3130253
	737	WES_Data2	HLA-F	6	29693011	29693011	C	T	nonsynonymous SNV	p.P272S	c.C814T	Y	Y	0.3295	0.6582	0.3287	Germline	2.74533e-19	rs1736924
	738	WES_Data2	HLA-F	6	29694680	29694680	A	C	nonsynonymous SNV	p.N353H	c.A1057C	M	C	0.3636	0.7674	0.4038	LOH	6.23739e-05	rs3734814	COSM4006248
	739	WES_Data2	HLA-F	6	29694681	29694681	A	T	nonsynonymous SNV	p.N353I	c.A1058T	W	T	0.3704	0.7674	0.397	LOH	8.68869e-05	rs3734815	COSM4006249
	740	WES_Data2	HLA-A	6	29910358	29910358	C	G	nonsynonymous SNV	p.L10V	c.C28G	S	S	0.3243	0.6863	0.362	Germline	6.31994e-05	rs1143146	COSM5019102
	741	WES_Data2	HLA-A	6	29910558	29910558	T	A	nonsynonymous SNV	p.F33Y	c.T98A	W	W	0.3191	0.6154	0.2963	Germline	0.000193798	rs2075684	COSM4593981
	742	WES_Data2	HLA-A	6	29911064	29911064	A	G	nonsynonymous SNV	p.I121M	c.A363G	R	R	0.2781	0.6565	0.3784	Germline	1.60861e-11	rs1136695	COSM5019445
	743	WES_Data2	HLA-A	6	29911154	29911154	C	A	nonsynonymous SNV	p.N151K	c.C453A	M	M	0.2928	0.6102	0.3174	Germline	1.58061e-10	rs1059509	COSM4160517
	744	WES_Data2	HLA-A	6	29911198	29911198	T	C	nonsynonymous SNV	p.I166T	c.T497C	Y	Y	0.3019	0.6188	0.3169	Germline	8.45405e-10	rs1059516	COSM4597433
	745	WES_Data2	HLA-A	6	29911207	29911207	G	A	nonsynonymous SNV	p.R169H	c.G506A	R	R	0.3122	0.6076	0.2954	Germline	1.51584e-08	rs1059520	COSM3733673
	746	WES_Data2	HLA-A	6	29911228	29911228	A	T	nonsynonymous SNV	p.E176V	c.A527T	W	W	0.3026	0.6096	0.307	Germline	1.23363e-08	rs9256983	COSM3733674
	747	WES_Data2	HLA-A	6	29911240	29911240	T	G	nonsynonymous SNV	p.L180W	c.T539G	K	K	0.3034	0.6493	0.3459	Germline	9.50445e-10	rs9260156	COSM5020107
	748	WES_Data2	HLA-A	6	29911256	29911256	T	G	nonsynonymous SNV	p.D185E	c.T555G	K	K	0.3352	0.6364	0.3012	Germline	1.11973e-07	rs1059542	COSM4160521
	749	WES_Data2	HLA-A	6	29912085	29912085	C	T	nonsynonymous SNV	p.A269V	c.C806T	Y	Y	0.2269	0.4035	0.1766	Germline	5.89918e-06	rs148794540	COSM5019806
	750	WES_Data2	HLA-A	6	29912108	29912108	G	C	nonsynonymous SNV	p.E277Q	c.G829C	S	S	0.2486	0.4405	0.1919	Germline	1.38887e-06	rs2231095	COSM4593914
	751	WES_Data2	HLA-A	6	29912280	29912280	T	C	nonsynonymous SNV	p.L300P	c.T899C	Y	Y	0.3209	0.6471	0.3262	Germline	1.73345e-11	rs1136903	COSM4160531
	752	WES_Data2	HLA-A	6	29912333	29912333	C	T	nonsynonymous SNV	p.L318F	c.C952T	Y	Y	0.3318	0.6434	0.3116	Germline	5.54158e-09	rs3179982	COSM5019200
	753	WES_Data2	HLA-A	6	29912856	29912856	A	T	nonsynonymous SNV	p.T345S	c.A1033T	W	W	0.3982	0.6449	0.2467	Germline	1.35505e-08	rs2231119	COSM1621366
	754	WES_Data2	RNF39	6	30039349	30039349	C	T	nonsynonymous SNV	p.D268N	c.G802A	Y	Y	0.2845	0.5904	0.3059	Germline	1.40602e-05	rs1057539	COSM3761782
	755	WES_Data2	TRIM31	6	30071330	30071330	C	T	nonsynonymous SNV	p.E421K	c.G1261A	Y	Y	0.3235	0.6133	0.2898	Germline	4.39578e-15	rs1116221	COSM3761788
	756	WES_Data2	TRIM31	6	30078275	30078275	C	T	nonsynonymous SNV	p.V232I	c.G694A	Y	Y	0.3198	0.5704	0.2506	Germline	3.3638e-06	rs2523989
	757	WES_Data2	TRIM40	6	30114825	30114825	G	A	nonsynonymous SNV	p.E169K	c.G505A	R	R	0.3017	0.6453	0.3436	Germline	4.73279e-12	rs148660479
	758	WES_Data2	TRIM40	6	30114897	30114897	C	T	nonsynonymous SNV	p.L164F	c.C490T	Y	Y	0.3163	0.633	0.3167	Germline	6.63848e-15	rs113993403
	759	WES_Data2	TRIM10	6	30126177	30126177	G	A	nonsynonymous SNV	p.T252M	c.C755T	R	R	0.3231	0.7179	0.3948	Germline	9.20461e-05	rs61735038
	760	WES_Data2	TRIM10	6	30126225	30126225	A	G	nonsynonymous SNV	p.I236T	c.T707C	R	R	0.299	0.6351	0.3361	Germline	1.04973e-05	rs111803166
	761	WES_Data2	TRIM10	6	30126285	30126285	C	T	nonsynonymous SNV	p.R216K	c.G647A	Y	Y	0.3357	0.6696	0.3339	Germline	7.4859e-08	rs61737424
	762	WES_Data2	TRIM10	6	30126303	30126303	T	A	nonsynonymous SNV	p.Q210L	c.A629T	W	W	0.3448	0.672	0.3272	Germline	6.31576e-08	rs61737427
	763	WES_Data2	TRIM15	6	30131546	30131546	A	G	nonsynonymous SNV	p.I29V	c.A85G	R	R	0.2632	0.6471	0.3839	Germline	5.39783e-08	rs17194460	COSM3761795
	764	WES_Data2	TRIM15	6	30134987	30134987	C	T	nonsynonymous SNV	p.T139M	c.C416T	Y	Y	0.3669	0.6	0.2331	Germline	0.000436687	rs56866777
	765	WES_Data2	TRIM15	6	30139699	30139699	G	A	nonsynonymous SNV	p.S324N	c.G971A	R	R	0.2888	0.6847	0.3959	Germline	2.13638e-28	rs929156	COSM3761796
	766	WES_Data2	HLA-E	6	30458064	30458064	G	A	nonsynonymous SNV	p.G128R	c.G382A	R	R	0.6358	0.3185	-0.3173	Germline	3.82068e-08	rs1264457
	767	WES_Data2	PPP1R18	6	30652781	30652781	C	T	nonsynonymous SNV	p.G339R	c.G1015A	Y	Y	0.6569	0.2842	-0.3727	Germline	7.41854e-14	rs9262143
	768	WES_Data2	DDR1	6	30862423	30862423	C	T	nonsynonymous SNV	p.P469L	c.C1406T	Y	Y	0.6983	0.3402	-0.3581	Germline	1.47757e-07	rs1264319	COSM3761810
	769	WES_Data2	VARS2	6	30888161	30888161	T	C	nonsynonymous SNV	p.W309R	c.T925C	Y	Y	0.315	0.6396	0.3246	Germline	9.11666e-13	rs2249464	COSM5427258
	770	WES_Data2	VARS2	6	30893127	30893127	G	A	nonsynonymous SNV	p.R777Q	c.G2330A	R	R	0.3304	0.6869	0.3565	Germline	1.57861e-07	rs9394021	COSM5427079
	771	WES_Data2	VARS2	6	30893941	30893941	G	A	nonsynonymous SNV	p.R909Q	c.G2726A	R	R	0.626	0.3304	-0.2956	Germline	5.38285e-11	rs4678
	772	WES_Data2	SFTA2	6	30899524	30899524	T	C	nonsynonymous SNV	p.N37S	c.A110G	Y	Y	0.6934	0.2727	-0.4207	Germline	1.14888e-10	rs3131787	COSM3761815
	773	WES_Data2	DPCR1	6	30920124	30920124	G	A	nonsynonymous SNV	p.E1295K	c.G3883A	R	R	0.6157	0.3351	-0.2806	Germline	3.12912e-09	rs3132580	COSM5904824
	774	WES_Data2	MUC22	6	30993533	30993533	A	G	nonsynonymous SNV	p.R109G	c.A325G	R	R	0.645	0.3378	-0.3072	Germline	5.37108e-19	rs2523898	COSM4160615
	775	WES_Data2	MUC22	6	30993813	30993813	G	A	nonsynonymous SNV	p.S202N	c.G605A	R	R	0.2989	0.6016	0.3027	Germline	7.68518e-20	rs62399429
	776	WES_Data2	MUC22	6	30993866	30993866	A	T	nonsynonymous SNV	p.T220S	c.A658T	W	W	0.2645	0.5859	0.3214	Germline	7.54954e-23	rs62399430	COSM5037910
	777	WES_Data2	MUC22	6	30993880	30993880	G	C	nonsynonymous SNV	p.E224D	c.G672C	S	S	0.2476	0.5851	0.3375	Germline	7.00941e-25	rs62399431	COSM5037823
	778	WES_Data2	MUC22	6	30995187	30995187	T	C	nonsynonymous SNV	p.I660T	c.T1979C	Y	Y	0.2505	0.5158	0.2653	Germline	1.98557e-15	rs62399443
	779	WES_Data2	MUC22	6	30995297	30995297	A	G	nonsynonymous SNV	p.I697V	c.A2089G	R	R	0.3197	0.6341	0.3144	Germline	1.32805e-24	rs62401664
	780	WES_Data2	MUC22	6	30995532	30995532	T	C	nonsynonymous SNV	p.M775T	c.T2324C	Y	Y	0.3447	0.6319	0.2872	Germline	4.13601e-25	rs62401665
	781	WES_Data2	MUC22	6	30996132	30996132	C	T	nonsynonymous SNV	p.T975I	c.C2924T	Y	Y	0.3093	0.6081	0.2988	Germline	1.31886e-25	rs12665700
	782	WES_Data2	MUC22	6	30996509	30996509	G	A	nonsynonymous SNV	p.E1101K	c.G3301A	R	R	0.3207	0.6632	0.3425	Germline	4.97053e-31	rs35464561	COSM4601249
	783	WES_Data2	MUC22	6	30996959	30996959	G	A	nonsynonymous SNV	p.E1251K	c.G3751A	G	R	0.1135	0.2337	0.1202	Somatic	5.86791e-09	rs200777418	COSM5346499
	784	WES_Data2	MUC22	6	30997334	30997334	A	G	nonsynonymous SNV	p.T1376A	c.A4126G	R	R	0.3232	0.6305	0.3073	Germline	4.23747e-25	rs11756038
	785	WES_Data2	MUC22	6	30997352	30997352	A	G	nonsynonymous SNV	p.S1382G	c.A4144G	R	R	0.3419	0.6513	0.3094	Germline	1.65695e-26	rs11756039	COSM4595389
	786	WES_Data2	MUC22	6	30997589	30997589	T	G	nonsynonymous SNV	p.S1461A	c.T4381G	T	K	0.1338	0.2401	0.1063	Somatic	4.28314e-07	rs11754361	COSM4160638
	787	WES_Data2	MUC22	6	30997692	30997692	G	C	nonsynonymous SNV	p.S1495T	c.G4484C	S	S	0.3003	0.6321	0.3318	Germline	1.72672e-29	rs9262549	COSM4594305
	788	WES_Data2	MUC22	6	30997824	30997824	T	C	nonsynonymous SNV	p.L1539P	c.T4616C	Y	Y	0.2646	0.6385	0.3739	Germline	1.47596e-23	rs12110785
	789	WES_Data2	MUC22	6	30999997	30999997	T	C	nonsynonymous SNV	p.L1565P	c.T4694C	Y	Y	0.3074	0.6441	0.3367	Germline	9.15043e-12	rs10947121	COSM4598188
	790	WES_Data2	MUC22	6	31002452	31002452	A	G	nonsynonymous SNV	p.N1687D	c.A5059G	R	R	0.3425	0.6098	0.2673	Germline	6.07387e-11	rs3869098
	791	WES_Data2	MUC22	6	31002527	31002527	A	G	nonsynonymous SNV	p.N1712D	c.A5134G	R	R	0.339	0.6157	0.2767	Germline	1.28456e-18	rs4248153
	792	WES_Data2	C6orf15	6	31079264	31079264	C	T	nonsynonymous SNV	p.G291D	c.G872A	Y	Y	0.3368	0.6203	0.2835	Germline	5.81835e-11	rs2233984
	793	WES_Data2	C6orf15	6	31079703	31079703	C	G	nonsynonymous SNV	p.A145P	c.G433C	S	S	0.373	0.6742	0.3012	Germline	4.75726e-12	rs2233978	COSM4160639
	794	WES_Data2	C6orf15	6	31079894	31079894	A	G	nonsynonymous SNV	p.V81A	c.T242C	R	R	0.3129	0.6277	0.3148	Germline	2.13753e-23	rs2233977
	795	WES_Data2	C6orf15	6	31080016	31080016	C	G	nonsynonymous SNV	p.L40F	c.G120C	S	S	0.6809	0.3205	-0.3604	Germline	2.04225e-24	rs2233974
	796	WES_Data2	CDSN	6	31084163	31084163	A	G	nonsynonymous SNV	p.L410S	c.T1229C	R	R	0.3533	0.6154	0.2621	Germline	5.14296e-10	rs3132554	COSM4006310
	797	WES_Data2	CDSN	6	31084170	31084170	A	C	nonsynonymous SNV	p.S408A	c.T1222G	M	M	0.3593	0.6092	0.2499	Germline	2.53756e-09	rs1042127	COSM4999218
	798	WES_Data2	CDSN	6	31088145	31088145	T	A	nonsynonymous SNV	p.M18L	c.A52T	W	W	0.6697	0.3204	-0.3493	Germline	2.94582e-07	rs3095318
	799	WES_Data2	CCHCR1	6	31110391	31110391	G	C	nonsynonymous SNV	p.S829C	c.C2486G	S	S	0.6545	0.2617	-0.3928	Germline	3.30631e-13	rs1576	COSM3761820
	800	WES_Data2	CCHCR1	6	31112737	31112737	C	A	nonsynonymous SNV	p.G628C	c.G1882T	M	M	0.6905	0.2857	-0.4048	Germline	1.13883e-13	rs130079
	801	WES_Data2	CCHCR1	6	31116502	31116502	C	T	nonsynonymous SNV	p.A420T	c.G1258A	Y	Y	0.3252	0.6762	0.351	Germline	9.90012e-08	rs2027937
	802	WES_Data2	CCHCR1	6	31118511	31118511	T	G	nonsynonymous SNV	p.E328D	c.A984C	K	K	0.3053	0.6375	0.3322	Germline	7.48614e-11	rs130067	COSM5001437
	803	WES_Data2	CCHCR1	6	31122482	31122482	G	A	nonsynonymous SNV	p.R162W	c.C484T	R	R	0.6667	0.3636	-0.3031	Germline	1.98761e-05	rs130076	COSM3761833
	804	WES_Data2	CCHCR1	6	31122500	31122500	G	A	nonsynonymous SNV	p.R156W	c.C466T	R	R	0.6667	0.3562	-0.3105	Germline	6.81728e-05	rs130065	COSM3761834
	805	WES_Data2	TCF19	6	31129310	31129310	C	T	nonsynonymous SNV	p.P109S	c.C325T	Y	Y	0.6384	0.3773	-0.2611	Germline	6.11029e-09	rs7750641
	806	WES_Data2	HLA-C	6	31237862	31237862	T	C	nonsynonymous SNV	p.E299G	c.A896G	Y	Y	0.7419	0.3458	-0.3961	Germline	1.44232e-10	rs9264621	COSM1285385
	807	WES_Data2	HLA-C	6	31239090	31239090	G	C	nonsynonymous SNV	p.L127V	c.C379G	S	S	0.4402	0.2574	-0.1828	Germline	0.00052962	rs34592426	COSM4595522
	808	WES_Data2	HLA-C	6	31239407	31239407	G	T	nonsynonymous SNV	p.N104K	c.C312A	K	K	0.3058	0.6076	0.3018	Germline	2.21701e-05	rs17408553
	809	WES_Data2	HLA-C	6	31239417	31239417	C	T	nonsynonymous SNV	p.S101N	c.G302A	Y	Y	0.3058	0.6047	0.2989	Germline	1.65215e-05	rs2308557
	810	WES_Data2	HLA-C	6	31239449	31239449	C	G	nonsynonymous SNV	p.K90N	c.G270C	S	S	0.3065	0.6629	0.3564	Germline	2.19562e-07	rs28626310
	811	WES_Data2	HLA-C	6	31239543	31239543	C	T	nonsynonymous SNV	p.R59Q	c.G176A	Y	Y	0.6293	0.3288	-0.3005	Germline	4.78594e-05	rs1050428	COSM4003922
	812	WES_Data2	HLA-C	6	31239585	31239585	C	T	nonsynonymous SNV	p.R45H	c.G134A	Y	Y	0.3762	0.7167	0.3405	Germline	2.47333e-05	rs1050437	COSM4160766
	813	WES_Data2	HLA-C	6	31239821	31239821	G	T	nonsynonymous SNV	p.L10I	c.C28A	K	K	0.6889	0.3556	-0.3333	Germline	0.000221238	rs2308527	COSM4160775
	814	WES_Data2	HLA-B	6	31322911	31322911	C	T	nonsynonymous SNV	p.A329T	c.G985A	Y	Y	0.3133	0.6022	0.2889	Germline	1.92557e-09	rs1051488	COSM328606
	815	WES_Data2	HLA-B	6	31322980	31322980	C	T	nonsynonymous SNV	p.V306I	c.G916A	Y	Y	0.2924	0.6237	0.3313	Germline	4.06699e-12	rs1131500
	816	WES_Data2	HLA-B	6	31324036	31324036	T	A	nonsynonymous SNV	p.E176V	c.A527T	T	W	0.1622	0.4328	0.2706	Somatic	0.000370253	rs151341293	COSM4160793
	817	WES_Data2	HLA-B	6	31324516	31324516	C	A	nonsynonymous SNV	p.D98Y	c.G292T	M	M	0.3621	0.6458	0.2837	Germline	3.17599e-05	rs1131215	COSM1443267
	818	WES_Data2	HLA-B	6	31324647	31324647	T	C	nonsynonymous SNV	p.D54G	c.A161G	Y	Y	0.2778	0.6667	0.3889	Germline	1.05193e-06	rs9266183
	819	WES_Data2	HLA-B	6	31324705	31324705	A	C	nonsynonymous SNV	p.S35A	c.T103G	M	M	0.7246	0.3521	-0.3725	Germline	8.67506e-06	rs1131170	COSM3761869
	820	WES_Data2	HLA-B	6	31324711	31324711	A	G	nonsynonymous SNV	p.Y33H	c.T97C	R	R	0.254	0.6232	0.3692	Germline	1.76331e-05	rs2596492	COSM5019352
	821	WES_Data2	HLA-B	6	31324925	31324925	A	G	nonsynonymous SNV	p.M4T	c.T11C	R	R	0.2394	0.4151	0.1757	Germline	0.0297165	rs1050458	COSM3722059
	822	WES_Data2	HLA-B	6	31324931	31324931	A	C	nonsynonymous SNV	p.L2R	c.T5G	M	M	0.2353	0.4	0.1647	Germline	0.0385303	rs9266206	COSM4160825
	823	WES_Data2	MICA	6	31378358	31378358	T	G	nonsynonymous SNV	p.W37G	c.T109G	K	K	0.6884	0.3097	-0.3787	Germline	9.03276e-13	rs1063630	COSM3761870
	824	WES_Data2	MICA	6	31378388	31378388	G	A	nonsynonymous SNV	p.A47T	c.G139A	R	R	0.2904	0.6751	0.3847	Germline	8.1102e-17	rs1051785	COSM3830094
	825	WES_Data2	MICA	6	31378510	31378510	G	A	nonsynonymous SNV	p.G7R	c.G19A	R	R	0.2984	0.6631	0.3647	Germline	1.11645e-20	rs1063632	COSM4985421
	826	WES_Data2	MICA	6	31379043	31379043	A	G	nonsynonymous SNV	p.M174V	c.A520G	R	R	0.6053	0.2767	-0.3286	Germline	1.98905e-18	rs41560824
	827	WES_Data2	MICA	6	31379990	31379990	C	G	nonsynonymous SNV	p.P294A	c.C880G	S	S	0.6341	0.3409	-0.2932	Germline	2.17921e-05	rs41553616
	828	WES_Data2	MICA	6	31380198	31380198	C	T	nonsynonymous SNV	p.P330L	c.C989T	Y	Y	0.6491	0.3654	-0.2837	Germline	0.00269785	rs61738275	COSM3761882
	829	WES_Data2	MICA	6	31382882	31382882	C	A	nonsynonymous SNV	p.A373D	c.C1118A	M	M	0.4278	0.7286	0.3008	Germline	6.01147e-17	rs9266825
	830	WES_Data2	MICA	6	31382893	31382893	A	G	nonsynonymous SNV	p.T377A	c.A1129G	R	R	0.562	0.2659	-0.2961	Germline	3.48244e-16	rs41545814
	831	WES_Data2	MICA	6	31382911	31382911	A	G	nonsynonymous SNV	p.T383A	c.A1147G	R	R	0.5546	0.253	-0.3016	Germline	5.13624e-16	rs1882
	832	WES_Data2	MICB	6	31473561	31473561	A	G	nonsynonymous SNV	p.K48E	c.A142G	R	R	0.3102	0.6349	0.3247	Germline	1.31448e-14	rs1065075	COSM3761883
	833	WES_Data2	MICB	6	31474000	31474000	G	A	nonsynonymous SNV	p.D104N	c.G310A	R	R	0.3449	0.6964	0.3515	Germline	3.90639e-20	rs1051788	COSM3761884
	834	WES_Data2	MCCD1	6	31496915	31496915	G	A	nonsynonymous SNV	p.E42K	c.G124A	R	R	0.5954	0.2931	-0.3023	Germline	1.46637e-06	rs2259435	COSM4160830
	835	WES_Data2	MCCD1	6	31496949	31496949	C	T	nonsynonymous SNV	p.T53M	c.C158T	Y	Y	0.5809	0.3136	-0.2673	Germline	1.53896e-05	rs78957773	COSM4160832
	836	WES_Data2	PRRC2A	6	31595882	31595882	C	A	nonsynonymous SNV	p.T544K	c.C1631A	M	M	0.2822	0.6012	0.319	Germline	1.40324e-10	rs1046080
	837	WES_Data2	PRRC2A	6	31601344	31601344	T	C	nonsynonymous SNV	p.L1503P	c.T4508C	Y	Y	0.3469	0.6518	0.3049	Germline	2.64016e-12	rs2272593
	838	WES_Data2	PRRC2A	6	31602967	31602967	G	A	nonsynonymous SNV	p.R1740H	c.G5219A	R	R	0.2966	0.6563	0.3597	Germline	5.48048e-29	rs1046089	COSM3761888
	839	WES_Data2	BAG6	6	31610686	31610686	A	G	nonsynonymous SNV	p.S619P	c.T1855C	R	R	0.6702	0.3505	-0.3197	Germline	3.24311e-17	rs1052486	COSM3774230
	840	WES_Data2	C6orf47	6	31627449	31627449	C	G	nonsynonymous SNV	p.K92N	c.G276C	S	S	0.2543	0.582	0.3277	Germline	1.23345e-08	rs2242655	COSM4003944
	841	WES_Data2	C6orf47	6	31627523	31627523	C	T	nonsynonymous SNV	p.G68R	c.G202A	Y	Y	0.2733	0.6279	0.3546	Germline	1.07183e-09	rs3130617
	842	WES_Data2	LY6G6F	6	31675765	31675765	G	A	nonsynonymous SNV	p.R167K	c.G500A	R	R	0.3938	0.6832	0.2894	Germline	4.03349e-08	rs2242653	COSM4003947
	843	WES_Data2	SAPCD1	6	31731881	31731881	C	T	nonsynonymous SNV	p.P99L	c.C296T	Y	Y	0.3103	0.5912	0.2809	Germline	8.68305e-09	rs6905572	COSM4003949
	844	WES_Data2	VARS	6	31762843	31762843	G	C	nonsynonymous SNV	p.P51R	c.C152G	S	S	0.6442	0.2473	-0.3969	Germline	1.68715e-08	rs2607015	COSM3761895
	845	WES_Data2	VARS	6	31762844	31762844	G	T	nonsynonymous SNV	p.P51T	c.C151A	K	K	0.6381	0.2447	-0.3934	Germline	1.84888e-08	rs2753960	COSM3761896
	846	WES_Data2	SLC44A4	6	31838441	31838441	T	C	nonsynonymous SNV	p.M284V	c.A850G	Y	Y	0.6395	0.3588	-0.2807	Germline	9.88167e-07	rs644827
	847	WES_Data2	SLC44A4	6	31839309	31839309	C	T	nonsynonymous SNV	p.V145I	c.G433A	Y	Y	0.64	0.3243	-0.3157	Germline	3.73728e-08	rs2242665	COSM5765382
	848	WES_Data2	SLC44A4	6	31846741	31846741	C	A	nonsynonymous SNV	p.R6L	c.G17T	C	M	0.1395	0.6667	0.5272	Somatic	1.18502e-07	rs2075798	COSM1162818
	849	WES_Data2	CFB	6	31914179	31914179	C	T	nonsynonymous SNV	p.R32W	c.C94T	Y	Y	0.3543	0.6683	0.314	Germline	2.02583e-12	rs12614	COSM4003953
	850	WES_Data2	CFB	6	31914180	31914180	G	A	nonsynonymous SNV	p.R32Q	c.G95A	R	R	0.6414	0.3254	-0.316	Germline	1.24171e-12	rs641153	COSM4984899
	851	WES_Data2	SKIV2L	6	31928306	31928306	A	G	nonsynonymous SNV	p.Q151R	c.A452G	R	R	0.6291	0.3362	-0.2929	Germline	2.05151e-16	rs438999	COSM4155178
	852	WES_Data2	SKIV2L	6	31936679	31936679	C	T	nonsynonymous SNV	p.A1071V	c.C3212T	Y	Y	0.6712	0.3527	-0.3185	Germline	1.45113e-13	rs449643	COSM3761898
	853	WES_Data2	STK19	6	31948448	31948448	A	G	nonsynonymous SNV	p.S307G	c.A919G	R	R	0.2834	0.6288	0.3454	Germline	6.7836e-10	rs616634	COSM4160884
	854	WES_Data2	C4A;C4B;C4B_2	6	31964228	31964228	A	G	nonsynonymous SNV	p.N1176S	c.A3527G	R	R	0.4091	0.7414	0.3323	Germline	1.86316e-18	rs17874654	COSM5428705
	855	WES_Data2	TNXB	6	32017173	32017173	G	C	nonsynonymous SNV	p.R3209G	c.C9625G	S	S	0.3434	0.6393	0.2959	Germline	0.0002331	rs41270450
	856	WES_Data2	TNXB	6	32021414	32021414	C	T	nonsynonymous SNV	p.G2846R	c.G8536A	Y	Y	0.3232	0.5867	0.2635	Germline	0.00044329	rs61745355	COSM5618399
	857	WES_Data2	TNXB	6	32023903	32023903	G	C	nonsynonymous SNV	p.P2731R	c.C8192G	S	S	0.6905	0.4043	-0.2862	Germline	1.9261e-05	rs440160
	858	WES_Data2	TNXB	6	32024395	32024395	C	T	nonsynonymous SNV	p.R2704H	c.G8111A	Y	Y	0.3029	0.6255	0.3226	Germline	1.23401e-13	rs10947230
	859	WES_Data2	TNXB	6	32026107	32026107	C	T	nonsynonymous SNV	p.G2518E	c.G7553A	Y	Y	0.6622	0.22	-0.4422	Germline	1.06024e-06	rs1009382	COSM4160919
	860	WES_Data2	TNXB	6	32029431	32029431	G	A	nonsynonymous SNV	p.P2412L	c.C7235T	R	R	0.3	0.7174	0.4174	Germline	5.72282e-06	rs12524664
	861	WES_Data2	TNXB	6	32041621	32041621	G	A	nonsynonymous SNV	p.T1495I	c.C4484T	R	R	0.6598	0.2733	-0.3865	Germline	2.1419e-13	rs6910390
	862	WES_Data2	NOTCH4	6	32190390	32190390	T	G	nonsynonymous SNV	p.K117Q	c.A349C	K	K	0.6064	0.2513	-0.3551	Germline	3.7631e-14	rs915894	COSM4417696
	863	WES_Data2	C6orf10	6	32261158	32261158	G	C	nonsynonymous SNV	p.T431S	c.C1292G	S	S	0.6022	0.3034	-0.2988	Germline	4.33561e-05	rs114543649
	864	WES_Data2	C6orf10	6	32261291	32261291	G	C	nonsynonymous SNV	p.Q387E	c.C1159G	S	S	0.625	0.2421	-0.3829	Germline	9.19267e-09	rs61995678	COSM5001452
	865	WES_Data2	C6orf10	6	32261507	32261507	T	C	nonsynonymous SNV	p.I315V	c.A943G	Y	Y	0.6374	0.325	-0.3124	Germline	3.85227e-05	rs3749966	COSM4003970
	866	WES_Data2	C6orf10	6	32261653	32261653	A	C	nonsynonymous SNV	p.L266W	c.T797G	C	M	0.7536	0.3019	-0.4517	Germline	5.91374e-07	rs4947338
	867	WES_Data2	BTNL2	6	32361749	32361749	G	C	nonsynonymous SNV	p.S482R	c.C1446G	G	S	0.1806	0.551	0.3704	Somatic	2.46638e-05	rs34940131
	868	WES_Data2	BTNL2	6	32361762	32361762	G	A	nonsynonymous SNV	p.P478L	c.C1433T	G	R	0.1974	0.549	0.3516	Somatic	4.56257e-05	rs35624343
	869	WES_Data2	BTNL2	6	32362741	32362741	C	T	nonsynonymous SNV	p.M380I	c.G1140A	Y	Y	0.2923	0.593	0.3007	Germline	9.58597e-15	rs28362677
	870	WES_Data2	BTNL2	6	32362745	32362745	G	A	nonsynonymous SNV	p.P379L	c.C1136T	R	R	0.2994	0.6142	0.3148	Germline	4.83766e-15	rs28362678
	871	WES_Data2	HLA-DRA	6	32411646	32411646	T	G	nonsynonymous SNV	p.L242V	c.T724G	K	K	0.3161	0.6306	0.3145	Germline	3.0615e-07	rs7192	COSM1443623
	872	WES_Data2	HLA-DRB5	6	32497917	32497917	C	A	nonsynonymous SNV	p.A29S	c.G85T	M	M	0.5864	0.7481	0.1617	Germline	0.00237641	rs71549220	COSM150069
	873	WES_Data2	HLA-DRB5	6	32497943	32497943	A	G	nonsynonymous SNV	p.M20T	c.T59C	R	G	0.5696	0.774	0.2044	LOH	0.000114833	rs17211043
	874	WES_Data2	HLA-DRB1	6	32549452	32549452	C	G	nonsynonymous SNV	p.Q178H	c.G534C	G	S	0.7583	0.3769	-0.3814	Germline	1.00697e-17	rs77637983	COSM451268
	875	WES_Data2	HLA-DRB1	6	32549481	32549481	C	T	nonsynonymous SNV	p.A169T	c.G505A	T	Y	0.8083	0.4571	-0.3512	Germline	3.26863e-21	rs78916069	COSM3830219
	876	WES_Data2	HLA-DRB1	6	32551939	32551939	G	T	nonsynonymous SNV	p.T106N	c.C317A	K	K	0.4838	0.3037	-0.1801	Germline	0.000342129	rs9269941	COSM4592378
	877	WES_Data2	HLA-DRB1	6	32551970	32551970	T	G	nonsynonymous SNV	p.I96L	c.A286C	K	G	0.6643	0.7712	0.1069	LOH	0.0124949	rs17886918	COSM4006428
	878	WES_Data2	HLA-DRB1	6	32552029	32552029	A	T	nonsynonymous SNV	p.F76Y	c.T227A	W	W	0.5856	0.7233	0.1377	Germline	0.000771774	rs17884945	COSM451269
	879	WES_Data2	HLA-DRB1	6	32552091	32552091	G	C	nonsynonymous SNV	p.F55L	c.C165G	G	S	0.1588	0.463	0.3042	Somatic	8.85896e-15	rs1059572	COSM3774250
	880	WES_Data2	HLA-DRB1	6	32557506	32557506	T	C	nonsynonymous SNV	p.K5R	c.A14G	Y	Y	0.5357	0.3842	-0.1515	Germline	9.91533e-06	rs707953	COSM4160983
	881	WES_Data2	HLA-DQA1	6	32609173	32609173	C	G	nonsynonymous SNV	p.Q57E	c.C169G	S	S	0.2705	0.6528	0.3823	Germline	7.47369e-16	rs10093	COSM4160990
	882	WES_Data2	HLA-DQA1	6	32610461	32610461	A	G	nonsynonymous SNV	p.M230V	c.A688G	R	R	0.3155	0.6965	0.381	Germline	1.65513e-27	rs9260	COSM4161007
	883	WES_Data2	HLA-DQB1	6	32629129	32629129	T	C	nonsynonymous SNV	p.Q256R	c.A767G	Y	Y	0.2365	0.5575	0.321	Germline	1.0135e-07	rs1130432	COSM5001890
	884	WES_Data2	HLA-DQB1	6	32629920	32629920	C	T	nonsynonymous SNV	p.R162Q	c.G485A	Y	Y	0.7213	0.3704	-0.3509	Germline	1.86719e-12	rs41544112
	885	WES_Data2	HLA-DQB1	6	32629936	32629936	C	T	nonsynonymous SNV	p.G157S	c.G469A	Y	Y	0.254	0.5897	0.3357	Germline	1.4393e-11	rs1049107	COSM5654066
	886	WES_Data2	HLA-DQB1	6	32629963	32629963	C	T	nonsynonymous SNV	p.V148I	c.G442A	Y	Y	0.2425	0.574	0.3315	Germline	3.01054e-12	rs1049100	COSM5654067
	887	WES_Data2	HLA-DQB1	6	32632601	32632601	G	C	nonsynonymous SNV	p.A118G	c.C353G	S	S	0.7474	0.3913	-0.3561	Germline	7.2329e-11	rs9274380
	888	WES_Data2	HLA-DQB1	6	32632628	32632628	G	C	nonsynonymous SNV	p.T109R	c.C326G	S	S	0.2381	0.5646	0.3265	Germline	3.20977e-10	rs1130392	COSM4161017
	889	WES_Data2	HLA-DQB1	6	32632647	32632647	T	C	nonsynonymous SNV	p.T103A	c.A307G	Y	Y	0.2488	0.56	0.3112	Germline	1.86174e-09	rs1130390	COSM3761948
	890	WES_Data2	HLA-DQB1	6	32632650	32632650	C	T	nonsynonymous SNV	p.G102R	c.G304A	T	Y	0.7524	0.4342	-0.3182	Germline	8.14006e-10	rs1130386	COSM3733869
	891	WES_Data2	HLA-DQB1	6	32632745	32632745	G	A	nonsynonymous SNV	p.A70V	c.C209T	R	R	0.25	0.5366	0.2866	Germline	2.4264e-07	rs1063318	COSM3761952
	892	WES_Data2	HLA-DQB1	6	32632770	32632770	A	G	nonsynonymous SNV	p.Y62H	c.T184C	R	R	0.2405	0.5161	0.2756	Germline	9.28688e-06	rs281862065	COSM3761953
	893	WES_Data2	HLA-DQB1	6	32632818	32632818	T	G	nonsynonymous SNV	p.M46L	c.A136C	K	K	0.2336	0.5082	0.2746	Germline	0.000295342	rs1130368	COSM5926549
	894	WES_Data2	HLA-DQB1	6	32634313	32634313	C	G	nonsynonymous SNV	p.M24I	c.G72C	S	S	0.21	0.5221	0.3121	Germline	1.44745e-09	rs1049059	COSM4161025
	895	WES_Data2	HLA-DQB1	6	32634369	32634369	C	A	nonsynonymous SNV	p.A6S	c.G16T	M	M	0.2387	0.4805	0.2418	Germline	6.15269e-07	rs1049056
	896	WES_Data2	HLA-DQB2	6	32726803	32726803	C	T	nonsynonymous SNV	p.R157Q	c.G470A	Y	Y	0.3571	0.6895	0.3324	Germline	2.83038e-12	rs1049110	COSM4161032
	897	WES_Data2	PSMB8	6	32811629	32811629	G	T	nonsynonymous SNV	p.Q49K	c.C145A	K	K	0.6393	0.3067	-0.3326	Germline	4.3708e-10	rs2071543	COSM4161043
	898	WES_Data2	HLA-DMB	6	32904981	32904981	G	A	nonsynonymous SNV	p.T197I	c.C590T	R	R	0.6341	0.4049	-0.2292	Germline	4.64652e-07	rs1042337
	899	WES_Data2	HLA-DPB1	6	33048542	33048542	C	T	nonsynonymous SNV	p.A65V	c.C194T	Y	Y	0.6489	0.3273	-0.3216	Germline	2.54915e-15	rs1042121	COSM4161051
	900	WES_Data2	HLA-DPB1	6	33048599	33048599	C	A	nonsynonymous SNV	p.A84D	c.C251A	M	M	0.6193	0.2879	-0.3314	Germline	7.83621e-12	rs707958	COSM4161052
	901	WES_Data2	HLA-DPB1	6	33048602	33048602	C	A	nonsynonymous SNV	p.A85E	c.C254A	M	M	0.6209	0.2932	-0.3277	Germline	3.04238e-11	rs1042131	COSM4407291
	902	WES_Data2	HLA-DPB1	6	33048640	33048640	A	G	nonsynonymous SNV	p.K98E	c.A292G	R	R	0.6322	0.3072	-0.325	Germline	3.08375e-09	rs1042140	COSM3761981
	903	WES_Data2	COL11A2	6	33153528	33153528	C	T	nonsynonymous SNV	p.E276K	c.G826A	Y	Y	0.6125	0.3353	-0.2772	Germline	3.11635e-07	rs9277934	COSM5479880
	904	WES_Data2	TAPBP	6	33272855	33272855	G	C	nonsynonymous SNV	p.T173R	c.C518G	S	S	0.3005	0.5933	0.2928	Germline	1.51576e-14	rs2071888	COSM1180608
	905	WES_Data2	ZBTB22	6	33283766	33283766	T	C	nonsynonymous SNV	p.T310A	c.A928G	Y	Y	0.3333	0.6744	0.3411	Germline	8.0495e-12	rs3130100	COSM3761994
	906	WES_Data2	CUTA	6	33384473	33384473	C	T	nonsynonymous SNV	p.R142H	c.G425A	Y	Y	0.3079	0.6429	0.335	Germline	2.21015e-17	rs41267649
	907	WES_Data2	SMIM29	6	34214348	34214348	C	T	nonsynonymous SNV	p.M121I	c.G363A	Y	Y	0.2904	0.6714	0.381	Germline	8.02114e-18	rs34410712	COSM4161092
	908	WES_Data2	PACSIN1	6	34498328	34498328	C	T	nonsynonymous SNV	p.A334V	c.C1001T	Y	Y	0.3252	0.6582	0.333	Germline	2.16721e-12	rs41312309
	909	WES_Data2	SLC26A8	6	35980121	35980121	C	T	nonsynonymous SNV	p.V73M	c.G217A	Y	Y	0.2945	0.678	0.3835	Germline	1.40205e-10	rs743923
	910	WES_Data2	PNPLA1	6	36274153	36274153	C	T	nonsynonymous SNV	p.T404M	c.C1211T	Y	Y	0.7273	0.2881	-0.4392	Germline	9.64695e-06	rs12197079	COSM3762011
	911	WES_Data2	C6orf222	6	36293083	36293083	G	A	nonsynonymous SNV	p.P382L	c.C1145T	R	R	0.358	0.6581	0.3001	Germline	6.95984e-08	rs76331220
	912	WES_Data2	PI16	6	36922684	36922684	A	C	nonsynonymous SNV	p.T50P	c.A148C	M	M	0.6437	0.3117	-0.332	Germline	1.85989e-05	rs1405069
	913	WES_Data2	FGD2	6	36976637	36976637	G	C	nonsynonymous SNV	p.Q32H	c.G96C	S	S	0.2755	0.631	0.3555	Germline	2.08414e-19	rs831510	COSM1131882
	914	WES_Data2	PIM1	6	37138220	37138220	C	G	nonsynonymous SNV	p.H48D	c.C142G	S	S	0.6417	0.3368	-0.3049	Germline	7.36027e-06	rs262936
	915	WES_Data2	MDGA1	6	37631768	37631768	A	G	nonsynonymous SNV	p.L61P	c.T182C	R	R	0.2759	0.6316	0.3557	Germline	4.45432e-06	rs10947690	COSM3762023
	916	WES_Data2	DNAH8	6	38729511	38729511	T	C	nonsynonymous SNV	p.Y517H	c.T1549C	Y	Y	0.6552	0.3125	-0.3427	Germline	2.75477e-05	rs61748600	COSM5618292
	917	WES_Data2	DNAH8	6	38746176	38746176	G	A	nonsynonymous SNV	p.A659T	c.G1975A	R	R	0.6038	0.25	-0.3538	Germline	0.000315747	rs61748601
	918	WES_Data2	DNAH8	6	38773293	38773293	G	A	nonsynonymous SNV	p.G1024E	c.G3071A	R	R	0.55	0.25	-0.3	Germline	0.000572998	rs874808	COSM3762035
	919	WES_Data2	KCNK17	6	39282036	39282036	T	C	nonsynonymous SNV	p.S21G	c.A61G	Y	Y	0.3898	0.663	0.2732	Germline	6.83892e-05	rs10947804	COSM4161144
	920	WES_Data2	KCNK16	6	39282806	39282806	G	T	nonsynonymous SNV	p.P254H	c.C761A	K	K	0.3215	0.6667	0.3452	Germline	3.43183e-15	rs11756091	COSM3762055
	921	WES_Data2	KCNK16	6	39284050	39284050	G	T	nonsynonymous SNV	p.A277E	c.C830A	K	K	0.3548	0.6204	0.2656	Germline	1.75321e-05	rs1535500	COSM3762057
	922	WES_Data2	MOCS1	6	39881102	39881102	A	T	nonsynonymous SNV	p.L239H	c.T716A	W	W	0.2925	0.6481	0.3556	Germline	7.56498e-15	rs7762875
	923	WES_Data2	APOBEC2	6	41021108	41021108	G	A	nonsynonymous SNV	p.A8T	c.G22A	R	R	0.2917	0.6887	0.397	Germline	2.84956e-18	rs41273358
	924	WES_Data2	APOBEC2	6	41029342	41029342	T	C	nonsynonymous SNV	p.I136T	c.T407C	Y	Y	0.6508	0.3636	-0.2872	Germline	2.73006e-16	rs2076472	COSM3762064
	925	WES_Data2	TREML2	6	41162518	41162518	T	C	nonsynonymous SNV	p.S144G	c.A430G	Y	Y	0.649	0.3548	-0.2942	Germline	5.81203e-20	rs3747742	COSM5480739
	926	WES_Data2	BYSL	6	41895150	41895150	G	A	nonsynonymous SNV	p.E103K	c.G307A	R	R	0.6207	0.3529	-0.2678	Germline	8.32279e-08	rs2296916
	927	WES_Data2	BYSL	6	41900406	41900406	C	T	nonsynonymous SNV	p.P426S	c.C1276T	Y	Y	0.6261	0.3218	-0.3043	Germline	1.76664e-14	rs3828855	COSM4004042
	928	WES_Data2	CCND3	6	41903782	41903782	A	C	nonsynonymous SNV	p.S187A	c.T559G	M	M	0.6963	0.2917	-0.4046	Germline	9.32295e-10	rs1051130	COSM451455
	929	WES_Data2	C6orf132	6	42074106	42074106	A	G	nonsynonymous SNV	p.L515P	c.T1544C	R	R	0.6154	0.3175	-0.2979	Germline	3.52613e-09	rs9394866	COSM4161187
	930	WES_Data2	C6orf132	6	42075069	42075069	A	G	nonsynonymous SNV	p.L194S	c.T581C	G	R	0.8409	0.3684	-0.4725	Germline	0.000348317	rs55772414	COSM4161191
	931	WES_Data2	TMEM63B	6	44115169	44115169	G	A	nonsynonymous SNV	p.V307M	c.G919A	R	R	0.2902	0.6336	0.3434	Germline	3.22922e-15	rs4714759	COSM150094
	932	WES_Data2	MYMX	6	44185254	44185254	T	C	nonsynonymous SNV	p.C16R	c.T46C	Y	Y	0.3107	0.602	0.2913	Germline	2.77437e-05	rs3734701
	933	WES_Data2	TCTE1	6	44255387	44255387	C	T	nonsynonymous SNV	p.R59H	c.G176A	Y	Y	0.3707	0.6479	0.2772	Germline	8.61885e-21	rs61742784	COSM4417270
	934	WES_Data2	AARS2	6	44270870	44270870	C	T	nonsynonymous SNV	p.V730M	c.G2188A	Y	Y	0.4128	0.7277	0.3149	Germline	1.16697e-11	rs35623954	COSM4999552
	935	WES_Data2	CLIC5	6	45916999	45916999	G	T	nonsynonymous SNV	p.P257H	c.C770A	K	K	0.3129	0.6604	0.3475	Germline	1.82049e-08	rs35822882
	936	WES_Data2	ENPP5	6	46135489	46135489	T	C	nonsynonymous SNV	p.I77V	c.A229G	Y	Y	0.7	0.3689	-0.3311	Germline	2.38654e-07	rs6926570	COSM4161254
	937	WES_Data2	ENPP5	6	46135984	46135984	G	T	nonsynonymous SNV	p.L6I	c.C16A	K	K	0.6026	0.3065	-0.2961	Germline	0.000416338	rs3806995
	938	WES_Data2	TDRD6	6	46657057	46657057	A	G	nonsynonymous SNV	p.T398A	c.A1192G	R	R	0.6496	0.3303	-0.3193	Germline	1.64258e-17	rs3799277
	939	WES_Data2	ADGRF2	6	47646748	47646748	T	C	nonsynonymous SNV	p.S49P	c.T145C	Y	Y	0.3636	0.6522	0.2886	Germline	2.22931e-06	rs13212023	COSM4997888
	940	WES_Data2	ADGRF2	6	47646842	47646842	A	G	nonsynonymous SNV	p.Q80R	c.A239G	R	R	0.5833	0.2623	-0.321	Germline	1.01559e-07	rs6907125
	941	WES_Data2	ADGRF2	6	47649265	47649265	T	A	nonsynonymous SNV	p.L256M	c.T766A	W	W	0.3478	0.6641	0.3163	Germline	7.04058e-08	rs17541107	COSM5001985
	942	WES_Data2	ADGRF2	6	47649574	47649574	A	G	nonsynonymous SNV	p.K359E	c.A1075G	R	R	0.5976	0.2901	-0.3075	Germline	1.00878e-07	rs10807372	COSM5003950
	943	WES_Data2	ADGRF2	6	47649694	47649694	A	G	nonsynonymous SNV	p.I399V	c.A1195G	R	R	0.6667	0.2917	-0.375	Germline	7.3721e-12	rs9381594	COSM4161262
	944	WES_Data2	DEFB133	6	49913927	49913927	C	T	nonsynonymous SNV	p.V25M	c.G73A	Y	Y	0.5614	0.2115	-0.3499	Germline	0.000168835	rs17664085
	945	WES_Data2	PKHD1	6	51483961	51483961	T	C	nonsynonymous SNV	p.Q4048R	c.A12143G	Y	Y	0.3518	0.6862	0.3344	Germline	1.07913e-17	rs9381994	COSM1445058
	946	WES_Data2	PKHD1	6	51491884	51491884	T	C	nonsynonymous SNV	p.Q3899R	c.A11696G	Y	Y	0.4082	0.5513	0.1431	Germline	0.0410587	rs4715227	COSM4004068
	947	WES_Data2	IL17F	6	52101844	52101844	T	C	nonsynonymous SNV	p.E126G	c.A377G	Y	Y	0.312	0.6873	0.3753	Germline	1.43102e-37	rs2397084	COSM1579556
	948	WES_Data2	KLHL31	6	53519707	53519707	C	A	nonsynonymous SNV	p.A122S	c.G364T	M	M	0.2336	0.5274	0.2938	Germline	3.88596e-09	rs116548230
	949	WES_Data2	LRRC1	6	53762092	53762092	A	G	nonsynonymous SNV	p.I193V	c.A577G	R	R	0.6892	0.2444	-0.4448	Germline	9.38241e-09	rs9349688	COSM3762138
	950	WES_Data2	MLIP	6	53989526	53989526	G	A	nonsynonymous SNV	p.V159I	c.G475A	R	R	0.6527	0.321	-0.3317	Germline	2.44785e-19	rs4712056
	951	WES_Data2	MLIP	6	54002231	54002231	A	C	nonsynonymous SNV	p.E444A	c.A1331C	M	M	0.274	0.7021	0.4281	Germline	5.46367e-11	rs2754779	COSN23016816
	952	WES_Data2	TINAG	6	54186147	54186147	T	C	nonsynonymous SNV	p.S158P	c.T472C	Y	Y	0.2471	0.6379	0.3908	Germline	3.37188e-11	rs1058768
	953	WES_Data2	GFRAL	6	55196587	55196587	C	T	nonsynonymous SNV	p.R33C	c.C97T	Y	Y	0.5818	0.3469	-0.2349	Germline	0.000551429	rs12199003	COSM3762142
	954	WES_Data2	DST	6	56482801	56482801	C	G	nonsynonymous SNV	p.V2011L	c.G6031C	S	S	0.3228	0.6979	0.3751	Germline	4.87097e-09	rs6459166	COSM4004105
	955	WES_Data2	EYS	6	65300143	65300143	G	C	nonsynonymous SNV	p.L1873V	c.C5617G	S	S	0.614	0.2973	-0.3167	Germline	1.46471e-07	rs16895517
	956	WES_Data2	EYS	6	65300250	65300250	C	G	nonsynonymous SNV	p.W1837S	c.G5510C	S	S	0.3296	0.6612	0.3316	Germline	1.28004e-08	rs199689193
	957	WES_Data2	EYS	6	65301211	65301211	T	C	nonsynonymous SNV	p.S1517G	c.A4549G	Y	Y	0.7126	0.2454	-0.4672	Germline	3.01602e-18	rs62415826	COSM4161305
	958	WES_Data2	EYS	6	65301217	65301217	G	A	nonsynonymous SNV	p.R1515W	c.C4543T	R	R	0.7196	0.2575	-0.4621	Germline	1.00525e-18	rs62415827	COSM4161306
	959	WES_Data2	EYS	6	65301408	65301408	A	G	nonsynonymous SNV	p.I1451T	c.T4352C	R	R	0.6712	0.3214	-0.3498	Germline	6.79672e-13	rs62415828
	960	WES_Data2	EYS	6	65301504	65301504	A	G	nonsynonymous SNV	p.L1419S	c.T4256C	R	R	0.6726	0.3556	-0.317	Germline	2.99952e-08	rs624851	COSM5000841
	961	WES_Data2	EYS	6	65301679	65301679	T	C	nonsynonymous SNV	p.I1361V	c.A4081G	Y	Y	0.6389	0.2529	-0.386	Germline	5.66584e-08	rs17403955
	962	WES_Data2	EYS	6	65301787	65301787	G	C	nonsynonymous SNV	p.Q1325E	c.C3973G	S	S	0.5789	0.2716	-0.3073	Germline	1.64862e-05	rs12663622	COSM150116
	963	WES_Data2	EYS	6	65303100	65303100	T	C	nonsynonymous SNV	p.I1263V	c.A3787G	Y	Y	0.5685	0.3158	-0.2527	Germline	4.58372e-06	rs17404123	COSM150118
	964	WES_Data2	EYS	6	65622463	65622463	A	G	nonsynonymous SNV	p.L852P	c.T2555C	R	R	0.33	0.6443	0.3143	Germline	3.96931e-09	rs9294631	COSM5038142
	965	WES_Data2	EYS	6	66005857	66005857	T	A	nonsynonymous SNV	p.E641V	c.A1922T	W	W	0.6931	0.4211	-0.272	Germline	6.65426e-07	rs17411795	COSM1137554
	966	WES_Data2	EYS	6	66005888	66005888	C	T	nonsynonymous SNV	p.G631S	c.G1891A	Y	Y	0.3281	0.504	0.1759	Germline	0.00133026	rs9342464
	967	WES_Data2	LOC441155	6	66013183	66013183	G	A	nonsynonymous SNV	p.V257I	c.G769A	R	R	0.6038	0.3947	-0.2091	Germline	0.00049294	rs546110448	COSN15639711
	968	WES_Data2	ADGRB3	6	69666684	69666684	A	G	nonsynonymous SNV	p.N503S	c.A1508G	R	R	0.6442	0.2947	-0.3495	Germline	4.62765e-08	rs1932618
	969	WES_Data2	COL9A1	6	70961833	70961833	T	C	nonsynonymous SNV	p.Q378R	c.A1133G	Y	Y	0.5859	0.3529	-0.233	Germline	0.00245419	rs1135056	COSM3762160
	970	WES_Data2	FAM135A	6	71238105	71238105	A	G	nonsynonymous SNV	p.D1013G	c.A3038G	R	R	0.28	0.6058	0.3258	Germline	1.97004e-07	rs2747701	COSM3762170
	971	WES_Data2	SMAP1	6	71569090	71569090	T	C	nonsynonymous SNV	p.M416T	c.T1247C	Y	Y	0.6519	0.3043	-0.3476	Germline	1.57265e-15	rs576516	COSM4004116
	972	WES_Data2	KHDC1	6	73952179	73952179	T	A	nonsynonymous SNV	p.H21L	c.A62T	W	W	0.3295	0.6563	0.3268	Germline	2.55018e-20	.
	973	WES_Data2	COL12A1	6	75848181	75848181	A	G	nonsynonymous SNV	p.I574T	c.T1721C	R	R	0.555	0.2754	-0.2796	Germline	4.76823e-08	rs240736	COSM4161350
	974	WES_Data2	SENP6	6	76344431	76344431	C	T	nonsynonymous SNV	p.T121M	c.C362T	Y	Y	0.6627	0.2714	-0.3913	Germline	1.16132e-06	rs17414086
	975	WES_Data2	SENP6	6	76425288	76425288	A	G	nonsynonymous SNV	p.Y1099C	c.A3296G	R	R	0.6346	0.3191	-0.3155	Germline	0.00156165	rs9250
	976	WES_Data2	PHIP	6	79692751	79692751	G	A	nonsynonymous SNV	p.T874I	c.C2621T	R	R	0.3492	0.5581	0.2089	Germline	0.0266843	rs11547228	COSM4004130
	977	WES_Data2	IBTK	6	82900811	82900811	G	A	nonsynonymous SNV	p.A1170V	c.C3509T	R	R	0.2135	0.5	0.2865	Germline	4.39955e-07	rs9449444	COSM3762197
	978	WES_Data2	ZNF292	6	87967636	87967636	A	G	nonsynonymous SNV	p.N1430S	c.A4289G	R	R	0.6905	0.2921	-0.3984	Germline	6.39854e-09	rs6941356
	979	WES_Data2	GJB7	6	87994015	87994015	A	G	nonsynonymous SNV	p.F206L	c.T616C	R	R	0.6591	0.3824	-0.2767	Germline	2.09508e-05	rs6934603	COSM3762211
	980	WES_Data2	GJB7	6	87994572	87994572	G	A	nonsynonymous SNV	p.T20I	c.C59T	R	R	0.6885	0.3333	-0.3552	Germline	1.31985e-09	rs4707358	COSM3762212
	981	WES_Data2	CFAP206	6	88125542	88125542	G	A	nonsynonymous SNV	p.R141H	c.G422A	R	R	0.6552	0.2881	-0.3671	Germline	5.06322e-10	rs61731441
	982	WES_Data2	RARS2	6	88239266	88239266	T	C	nonsynonymous SNV	p.K116R	c.A347G	Y	Y	0.7059	0.2941	-0.4118	Germline	0.0060826	rs17850652
	983	WES_Data2	GABRR1	6	89926962	89926962	T	C	nonsynonymous SNV	p.H27R	c.A80G	C	Y	0.7524	0.2535	-0.4989	Germline	4.53437e-11	rs1186902	COSM150132
	984	WES_Data2	ANKRD6	6	90315789	90315789	A	G	nonsynonymous SNV	p.I128V	c.A382G	R	R	0.3418	0.6784	0.3366	Germline	2.6048e-17	rs3748085	COSM4406859
	985	WES_Data2	ANKRD6	6	90340446	90340446	C	T	nonsynonymous SNV	p.P572L	c.C1715T	Y	Y	0.6575	0.3109	-0.3466	Germline	2.74835e-28	rs61739327	COSM4004148
	986	WES_Data2	LYRM2	6	90347511	90347511	T	C	nonsynonymous SNV	p.K46E	c.A136G	Y	Y	0.3243	0.6769	0.3526	Germline	2.96576e-05	rs34012596
	987	WES_Data2	MDN1	6	90372574	90372574	A	C	nonsynonymous SNV	p.D4783E	c.T14349G	M	M	0.7273	0.2857	-0.4416	Germline	1.12644e-06	rs36040566	COSM4004151
	988	WES_Data2	MDN1	6	90374283	90374283	A	G	nonsynonymous SNV	p.I4720T	c.T14159C	R	R	0.3222	0.6463	0.3241	Germline	1.82128e-05	rs16882046
	989	WES_Data2	MDN1	6	90384274	90384274	T	C	nonsynonymous SNV	p.R4266G	c.A12796G	Y	Y	0.3277	0.6917	0.364	Germline	5.15927e-10	rs41273327
	990	WES_Data2	MDN1	6	90397132	90397132	G	C	nonsynonymous SNV	p.A3794G	c.C11381G	S	S	0.7246	0.3455	-0.3791	Germline	2.29816e-05	rs34766278
	991	WES_Data2	MANEA	6	96034560	96034560	C	T	nonsynonymous SNV	p.T82I	c.C245T	Y	Y	0.2752	0.5909	0.3157	Germline	1.52502e-06	rs62417812
	992	WES_Data2	FHL5	6	97058574	97058574	G	A	nonsynonymous SNV	p.V211M	c.G631A	R	R	0.3258	0.5616	0.2358	Germline	6.09315e-06	rs2252816
	993	WES_Data2	SIM1	6	100868721	100868721	G	A	nonsynonymous SNV	p.A371V	c.C1112T	R	R	0.5812	0.2739	-0.3073	Germline	6.15456e-09	rs3734355	COSM150145
	994	WES_Data2	SIM1	6	100868779	100868779	G	T	nonsynonymous SNV	p.P352T	c.C1054A	K	K	0.5789	0.2797	-0.2992	Germline	1.62248e-07	rs3734354	COSM150146
	995	WES_Data2	ASCC3	6	100964147	100964147	G	C	nonsynonymous SNV	p.S1995C	c.C5984G	S	S	0.246	0.6479	0.4019	Germline	3.24742e-08	rs240780	COSM1132075
	996	WES_Data2	ASCC3	6	101296389	101296389	G	A	nonsynonymous SNV	p.L146F	c.C436T	R	R	0.6642	0.3628	-0.3014	Germline	1.63788e-06	rs9390698	COSM150148
	997	WES_Data2	GRIK2	6	102516260	102516260	G	A	nonsynonymous SNV	p.M867I	c.G2601A	R	R	0.6226	0.3086	-0.314	Germline	1.70041e-05	rs2235076
	998	WES_Data2	PREP	6	105726036	105726036	C	T	nonsynonymous SNV	p.V706I	c.G2116A	Y	Y	0.2679	0.6237	0.3558	Germline	7.06049e-13	rs1051484	COSM4417968
	999	WES_Data2	CRYBG1	6	106999822	106999822	G	A	nonsynonymous SNV	p.C1395Y	c.G4184A	R	R	0.6842	0.371	-0.3132	Germline	1.6297e-07	rs2297970	COSM3761411
	1000	WES_Data2	SCML4	6	108068003	108068003	C	T	nonsynonymous SNV	p.R68Q	c.G203A	Y	Y	0.6295	0.3607	-0.2688	Germline	1.89297e-09	rs6934505	COSM4416709
	1001	WES_Data2	C6orf183	6	109583186	109583186	A	G	nonsynonymous SNV	p.D363G	c.A1088G	R	R	0.6651	0.2796	-0.3855	Germline	7.85374e-16	rs1040285
	1002	WES_Data2	C6orf183	6	109586062	109586062	C	T	nonsynonymous SNV	p.P419S	c.C1255T	Y	Y	0.639	0.313	-0.326	Germline	3.97175e-09	rs949882	COSM4417550
	1003	WES_Data2	REV3L	6	111628626	111628626	C	T	nonsynonymous SNV	p.V3064I	c.G9190A	Y	Y	0.3077	0.6096	0.3019	Germline	2.00432e-07	rs3204953
	1004	WES_Data2	REV3L	6	111695887	111695887	G	A	nonsynonymous SNV	p.T1224I	c.C3671T	R	A	0.35	0.7838	0.4338	LOH	2.916e-05	rs462779	COSM4409266
	1005	WES_Data2	WISP3	6	112382313	112382313	G	T	nonsynonymous SNV	p.Q74H	c.G222T	K	K	0.6377	0.2792	-0.3585	Germline	1.05863e-18	rs1230345	COSM5654082
	1006	WES_Data2	LAMA4	6	112522852	112522852	G	A	nonsynonymous SNV	p.R154W	c.C460T	R	R	0.3478	0.6	0.2522	Germline	0.00543777	rs11757455
	1007	WES_Data2	RFPL4B	6	112671611	112671611	G	A	nonsynonymous SNV	p.G234D	c.G701A	R	R	0.6526	0.3444	-0.3082	Germline	1.14328e-08	rs11153361	COSM3723349
	1008	WES_Data2	TSPYL4	6	116574703	116574703	G	T	nonsynonymous SNV	p.R157S	c.C469A	K	K	0.2937	0.6528	0.3591	Germline	8.57107e-07	rs182432245	COSM3157086
	1009	WES_Data2	ROS1	6	117724379	117724379	C	T	nonsynonymous SNV	p.R167Q	c.G500A	Y	Y	0.3622	0.6114	0.2492	Germline	1.28069e-07	rs2243380	COSM5019315
	1010	WES_Data2	ROS1	6	117725448	117725448	T	G	nonsynonymous SNV	p.T145P	c.A433C	K	K	0.5938	0.3125	-0.2813	Germline	1.01984e-05	rs1998206	COSM4003669
	1011	WES_Data2	CEP85L	6	118887303	118887303	T	C	nonsynonymous SNV	p.S137G	c.A409G	Y	Y	0.3153	0.6623	0.347	Germline	2.26504e-11	rs3734381	COSM3761464
	1012	WES_Data2	TBC1D32	6	121602785	121602785	T	A	nonsynonymous SNV	p.S505C	c.A1513T	W	W	0.22	0.6667	0.4467	Germline	8.98109e-05	rs79221470
	1013	WES_Data2	TBC1D32	6	121638682	121638682	G	A	nonsynonymous SNV	p.R152C	c.C454T	R	R	0.2667	0.5854	0.3187	Germline	0.00129487	rs75540618	COSM39352
	1014	WES_Data2	SMPDL3A	6	123122464	123122464	C	T	nonsynonymous SNV	p.P30S	c.C88T	Y	Y	0.252	0.69	0.438	Germline	4.18167e-11	rs28385609	COSM3761471
	1015	WES_Data2	TRDN	6	123869607	123869607	G	C	nonsynonymous SNV	p.T128S	c.C383G	S	S	0.6875	0.3692	-0.3183	Germline	0.000115893	rs9490809
	1016	WES_Data2	NCOA7	6	126210395	126210395	T	G	nonsynonymous SNV	p.S284A	c.T850G	K	K	0.6689	0.3889	-0.28	Germline	2.10005e-05	rs6919947	COSM4003675
	1017	WES_Data2	HINT3	6	126278230	126278230	G	C	nonsynonymous SNV	p.G36A	c.G107C	S	S	0.327	0.621	0.294	Germline	1.0673e-14	rs2295005	COSM450440
	1018	WES_Data2	KIAA0408	6	127768472	127768472	G	A	nonsynonymous SNV	p.S331L	c.C992T	R	R	0.4444	0.7143	0.2699	Germline	1.64728e-06	rs2236026	COSM4003676
	1019	WES_Data2	KIAA0408	6	127771452	127771452	T	G	nonsynonymous SNV	p.S61R	c.A181C	K	K	0.7179	0.3091	-0.4088	Germline	2.89264e-06	rs3734447	COSM4407200
	1020	WES_Data2	THEMIS	6	128040839	128040839	T	C	nonsynonymous SNV	p.I630V	c.A1888G	Y	Y	0.66	0.3619	-0.2981	Germline	1.62214e-05	rs675531	COSM150180
	1021	WES_Data2	LAMA2	6	129687396	129687396	G	A	nonsynonymous SNV	p.G1584S	c.G4750A	R	R	0.265	0.6968	0.4318	Germline	3.45146e-19	rs117781224
	1022	WES_Data2	ARHGAP18	6	130031215	130031215	T	C	nonsynonymous SNV	p.T23A	c.A67G	Y	Y	0.2678	0.6667	0.3989	Germline	1.32254e-12	rs3752536	COSM4407294
	1023	WES_Data2	TAAR2	6	132938842	132938842	C	T	stopgain	p.W123X	c.G368A	Y	Y	0.3	0.6169	0.3169	Germline	2.02311e-09	rs8192646	COSM4003687
	1024	WES_Data2	VNN1	6	133035098	133035098	G	A	nonsynonymous SNV	p.T26I	c.C77T	R	R	0.6786	0.3805	-0.2981	Germline	6.88471e-07	rs2294757	COSM5003494
	1025	WES_Data2	HBS1L	6	135358567	135358567	T	G	nonsynonymous SNV	p.E343A	c.A1028C	K	K	0.339	0.5405	0.2015	Germline	0.041344	rs7742542	COSM4407238
	1026	WES_Data2	IL20RA	6	137323213	137323213	G	A	nonsynonymous SNV	p.L271F	c.C811T	R	R	0.3127	0.5916	0.2789	Germline	1.1318e-09	rs1342642	COSM3761495
	1027	WES_Data2	PERP	6	138413333	138413333	G	C	nonsynonymous SNV	p.P143R	c.C428G	S	S	0.6429	0.3257	-0.3172	Germline	9.25035e-18	rs648802
	1028	WES_Data2	NHSL1	6	138753279	138753279	G	A	nonsynonymous SNV	p.R739C	c.C2215T	R	R	0.6275	0.3352	-0.2923	Germline	1.43158e-09	rs763185214
	1029	WES_Data2	HECA	6	139488050	139488050	G	A	nonsynonymous SNV	p.A301T	c.G901A	R	R	0.6708	0.3111	-0.3597	Germline	4.6102e-22	.
	1030	WES_Data2	NMBR	6	142400020	142400020	G	T	nonsynonymous SNV	p.P148H	c.C443A	K	K	0.6765	0.2857	-0.3908	Germline	3.96075e-11	rs138994608
	1031	WES_Data2	STXBP5	6	147635413	147635413	A	G	nonsynonymous SNV	p.N436S	c.A1307G	R	R	0.5846	0.3239	-0.2607	Germline	0.0019119	rs1039084	COSM4003723
	1032	WES_Data2	SASH1	6	148865257	148865257	A	G	nonsynonymous SNV	p.Q645R	c.A1934G	R	R	0.6274	0.3066	-0.3208	Germline	4.06761e-19	rs208696	COSM4160273
	1033	WES_Data2	SUMO4	6	149721690	149721690	G	A	nonsynonymous SNV	p.V55M	c.G163A	R	R	0.3022	0.6612	0.359	Germline	5.45148e-09	rs237025
	1034	WES_Data2	ZC3H12D	6	149772190	149772190	G	A	nonsynonymous SNV	p.P405S	c.C1213T	R	R	0.4643	0.6393	0.175	Germline	0.0427833	rs112722576	COSM166888
	1035	WES_Data2	PCMT1	6	150114745	150114745	G	A	nonsynonymous SNV	p.V143I	c.G427A	R	R	0.3333	0.6818	0.3485	Germline	1.12543e-05	rs4816	COSM3761538
	1036	WES_Data2	AKAP12	6	151672185	151672185	A	T	nonsynonymous SNV	p.S789C	c.A2365T	W	W	0.659	0.3033	-0.3557	Germline	8.10244e-18	rs61748676
	1037	WES_Data2	SYNE1	6	152443744	152443744	G	T	nonsynonymous SNV	p.L919M	c.C2755A	K	K	0.3011	0.6791	0.378	Germline	9.99087e-27	rs2295190	COSM3761557
	1038	WES_Data2	SYNE1	6	152647681	152647681	A	T	nonsynonymous SNV	p.L4944M	c.T14830A	W	W	0.5858	0.3281	-0.2577	Germline	7.98372e-06	rs2306916	COSM5010197
	1039	WES_Data2	SYNE1	6	152652034	152652034	A	T	nonsynonymous SNV	p.S4525T	c.T13573A	W	W	0.625	0.253	-0.372	Germline	1.91603e-07	rs6911096	COSM5010199
	1040	WES_Data2	SYNE1	6	152658142	152658142	T	C	nonsynonymous SNV	p.K4050R	c.A12149G	Y	Y	0.6989	0.3175	-0.3814	Germline	2.4501e-06	rs9479297	COSM5010203
	1041	WES_Data2	SYNE1	6	152708310	152708310	G	A	nonsynonymous SNV	p.A2802V	c.C8405T	R	R	0.3413	0.6423	0.301	Germline	1.32815e-07	rs214950	COSM3761572
	1042	WES_Data2	FBXO5	6	153296541	153296541	G	C	nonsynonymous SNV	p.Q61E	c.C181G	S	S	0.3279	0.6239	0.296	Germline	5.51466e-06	rs2073260	COSM3761597
	1043	WES_Data2	MTRF1L	6	153323594	153323594	C	T	nonsynonymous SNV	p.R76Q	c.G227A	Y	Y	0.2837	0.6771	0.3934	Germline	1.73401e-15	rs3818123	COSM3761600
	1044	WES_Data2	MTRF1L	6	153323709	153323709	T	C	nonsynonymous SNV	p.T38A	c.A112G	Y	Y	0.3153	0.6842	0.3689	Germline	5.85335e-07	rs3818125	COSM4590070
	1045	WES_Data2	TIAM2	6	155451352	155451352	G	A	nonsynonymous SNV	p.R332H	c.G995A	R	R	0.3226	0.607	0.2844	Germline	7.99292e-15	rs931312	COSM5617632
	1046	WES_Data2	RSPH3	6	159398700	159398700	C	T	nonsynonymous SNV	p.G422D	c.G1265A	Y	Y	0.5658	0.2741	-0.2917	Germline	4.55723e-07	rs3756987	COSM150206
	1047	WES_Data2	RSPH3	6	159407446	159407446	C	T	nonsynonymous SNV	p.R213Q	c.G638A	Y	Y	0.609	0.22	-0.389	Germline	1.86519e-09	rs34582178	COSM150209
	1048	WES_Data2	RSPH3	6	159414899	159414899	T	C	nonsynonymous SNV	p.N201S	c.A602G	Y	Y	0.5962	0.2623	-0.3339	Germline	1.88287e-08	rs16889320	COSM150210
	1049	WES_Data2	FNDC1	6	159621087	159621087	C	T	nonsynonymous SNV	p.P122S	c.C364T	Y	Y	0.6242	0.3561	-0.2681	Germline	5.64286e-06	rs62432291
	1050	WES_Data2	FNDC1	6	159650978	159650978	A	G	nonsynonymous SNV	p.T438A	c.A1312G	R	R	0.6333	0.3115	-0.3218	Germline	8.97558e-05	rs509648
	1051	WES_Data2	FNDC1	6	159652931	159652931	G	C	nonsynonymous SNV	p.E463Q	c.G1387C	S	S	0.2823	0.5707	0.2884	Germline	2.04379e-10	rs420137	COSM450819
	1052	WES_Data2	FNDC1	6	159654551	159654551	C	G	nonsynonymous SNV	p.Q1003E	c.C3007G	S	S	0.354	0.6354	0.2814	Germline	1.54942e-09	rs370434	COSM3761627
	1053	WES_Data2	FNDC1	6	159655084	159655084	C	G	nonsynonymous SNV	p.D1180E	c.C3540G	S	S	0.2764	0.6178	0.3414	Germline	5.88008e-13	rs420054	COSM4160339
	1054	WES_Data2	FNDC1	6	159655326	159655326	T	C	nonsynonymous SNV	p.L1261P	c.T3782C	Y	Y	0.2882	0.6081	0.3199	Germline	7.46168e-09	rs3003174	COSM3749959
	1055	WES_Data2	FNDC1	6	159655383	159655383	A	G	nonsynonymous SNV	p.Q1280R	c.A3839G	R	R	0.3312	0.632	0.3008	Germline	3.9052e-07	rs2501176	COSM4003774
	1056	WES_Data2	FNDC1	6	159660879	159660879	C	A	nonsynonymous SNV	p.T1504K	c.C4511A	M	M	0.3373	0.6797	0.3424	Germline	3.83533e-14	rs386360	COSM4160341
	1057	WES_Data2	SOD2	6	160113872	160113872	A	G	nonsynonymous SNV	p.V16A	c.T47C	R	R	0.3523	0.6087	0.2564	Germline	1.14099e-06	rs4880	COSM3761629
	1058	WES_Data2	SLC22A1	6	160560845	160560845	A	G	nonsynonymous SNV	p.M408V	c.A1222G	R	R	0.598	0.2759	-0.3221	Germline	7.27911e-06	rs628031
	1059	WES_Data2	LPA	6	160953642	160953642	A	G	nonsynonymous SNV	p.L1961P	c.T5882C	R	R	0.2552	0.7045	0.4493	Germline	6.50064e-16	rs41267809
	1060	WES_Data2	PLG	6	161152905	161152905	C	T	nonsynonymous SNV	p.R523W	c.C1567T	Y	Y	0.6587	0.3475	-0.3112	Germline	1.72936e-07	rs4252129
	1061	WES_Data2	PRKN	6	161807855	161807855	C	G	nonsynonymous SNV	p.V231L	c.G691C	S	S	0.2958	0.5299	0.2341	Germline	0.000105372	rs1801582	COSM4985458
	1062	WES_Data2	C6orf118	6	165713961	165713961	A	C	nonsynonymous SNV	p.I256M	c.T768G	M	M	0.3019	0.6538	0.3519	Germline	0.000285604	rs510579	COSM3761641
	1063	WES_Data2	T	6	166574346	166574346	G	A	nonsynonymous SNV	p.A280V	c.C839T	R	R	0.6904	0.3923	-0.2981	Germline	4.42143e-09	rs117097130
	1064	WES_Data2	T	6	166579270	166579270	C	T	nonsynonymous SNV	p.G177D	c.G530A	Y	Y	0.2807	0.6787	0.398	Germline	2.27942e-24	rs2305089	COSM4160357
	1065	WES_Data2	RPS6KA2	6	167271716	167271716	T	C	nonsynonymous SNV	p.E32G	c.A95G	Y	Y	0.6765	0.3469	-0.3296	Germline	3.46302e-09	rs9347162
	1066	WES_Data2	HGC6.3	6	168376908	168376908	T	C	nonsynonymous SNV	p.N142S	c.A425G	T	Y	0.0833	0.2727	0.1894	Somatic	0.0386842	rs2516605	COSN15630425
	1067	WES_Data2	HGC6.3	6	168376951	168376951	T	C	nonsynonymous SNV	p.M128V	c.A382G	T	Y	0.0488	0.2105	0.1617	Somatic	0.0328019	rs34562778	COSN15634170
	1068	WES_Data2	HGC6.3	6	168376953	168376953	A	C	nonsynonymous SNV	p.V127G	c.T380G	M	M	0.3953	0.7368	0.3415	Germline	0.00192543	rs2516607	COSN15642252
	1069	WES_Data2	HGC6.3	6	168377094	168377094	G	T	nonsynonymous SNV	p.P80H	c.C239A	G	K	0.0984	0.26	0.1616	Somatic	0.0228762	.
	1070	WES_Data2	KIF25	6	168442765	168442765	G	A	nonsynonymous SNV	p.A255T	c.G763A	R	R	0.3559	0.6744	0.3185	Germline	0.00136443	rs2073634
	1071	WES_Data2	WDR27	6	170070723	170070723	A	G	nonsynonymous SNV	p.L133P	c.T398C	R	R	0.6359	0.2889	-0.347	Germline	5.97824e-10	rs4236176	COSM3761673
	1072	WES_Data2	ERMARD	6	170176467	170176467	A	G	nonsynonymous SNV	p.K520E	c.A1558G	R	R	0.6373	0.3347	-0.3026	Germline	1.13671e-12	rs4716345	COSM4407409
	1073	WES_Data2	ERMARD	6	170176648	170176648	A	G	nonsynonymous SNV	p.S414G	c.A1240G	R	R	0.5742	0.3174	-0.2568	Germline	2.1292e-09	rs4716346	COSM3761679
	1074	WES_Data2	COL28A1	7	7514235	7514235	C	G	nonsynonymous SNV	p.E433D	c.G1299C	S	S	0.3858	0.5244	0.1386	Germline	0.0338584	rs6952195	COSM150235
	1075	WES_Data2	VWDE	7	12391319	12391319	G	T	nonsynonymous SNV	p.Q1141K	c.C3421A	K	K	0.697	0.2273	-0.4697	Germline	0.000716989	rs6967385	COSM3738204
	1076	WES_Data2	VWDE	7	12409522	12409522	A	G	nonsynonymous SNV	p.Y689H	c.T2065C	R	R	0.3819	0.5038	0.1219	Germline	0.0274079	rs3823844
	1077	WES_Data2	STEAP1B	7	22532260	22532260	A	G	nonsynonymous SNV	p.I229T	c.T686C	R	R	0.4348	0.5786	0.1438	Germline	0.00583242	rs16881817	COSM1294394
	1078	WES_Data2	CREB5	7	28610113	28610113	G	T	nonsynonymous SNV	p.S108I	c.G323T	G	K	0	0.4253	0.4253	Somatic	2.76136e-15	.
	1079	WES_Data2	ZNF92	7	64863392	64863392	C	T	nonsynonymous SNV	p.A46V	c.C137T	Y	Y	0.3158	0.6	0.2842	Germline	0.0177197	rs10265083	COSM4417082
	1080	WES_Data2	SPDYE5	7	75124680	75124680	C	A	nonsynonymous SNV	p.F122L	c.C366A	M	M	0.4444	0.7273	0.2829	Germline	0.0437866	rs149681440
	1081	WES_Data2	MEPCE	7	100029148	100029148	G	C	nonsynonymous SNV	p.E503Q	c.G1507C	G	S	0	0.4932	0.4932	Somatic	7.1199e-51	.
	1082	WES_Data2	UFSP1	7	100486754	100486754	G	C	nonsynonymous SNV	p.L47V	c.C139G	S	S	0.4338	0.55	0.1162	Germline	0.0416876	rs12666989	COSM4161413
	1083	WES_Data2	MUC3A	7	100552094	100552094	G	C	nonsynonymous SNV	p.G892A	c.G2675C	S	S	0.3786	0.5096	0.131	Germline	0.0279788	rs62483698
	1084	WES_Data2	MUC3A	7	100552117	100552117	G	T	nonsynonymous SNV	p.A900S	c.G2698T	K	K	0.4	0.5146	0.1146	Germline	0.047289	rs62483699	COSM4593927
	1085	WES_Data2	MUC3A	7	100552135	100552135	T	C	nonsynonymous SNV	p.S906P	c.T2716C	Y	Y	0.3841	0.5093	0.1252	Germline	0.0303986	rs62483700	COSM4593534
	1086	WES_Data2	SERPINE1	7	100780351	100780351	G	C	nonsynonymous SNV	p.R386P	c.G1157C	G	S	0	0.4767	0.4767	Somatic	3.49623e-39	.
	1087	WES_Data2	CTAGE6	7	143453778	143453778	T	C	nonsynonymous SNV	p.N325S	c.A974G	Y	C	0.4762	0.7586	0.2824	LOH	0.0155247	rs62486288
	1088	WES_Data2	CTAGE4;CTAGE8	7	143964051	143964051	G	A	nonsynonymous SNV	p.L765F	c.C2293T	R	R	0.2857	0.4677	0.182	Germline	0.0185708	rs200781769	COSM4593254
	1089	WES_Data2	ESYT2	7	158590740	158590740	A	T	nonsynonymous SNV	p.C182S	c.T544A	W	W	0.3692	0.5439	0.1747	Germline	0.0397618	rs13233513	COSM4416866
	1090	WES_Data2	ARHGEF10	8	1833801	1833801	G	C	nonsynonymous SNV	p.L332F	c.G996C	S	S	0.3778	0.4809	0.1031	Germline	0.0301145	rs9657362	COSM150437
	1091	WES_Data2	MCPH1	8	6302183	6302183	G	C	nonsynonymous SNV	p.D266H	c.G796C	S	S	0.2933	0.4683	0.175	Germline	0.00205656	rs930557	COSM5655105
	1092	WES_Data2	MCPH1	8	6338306	6338306	C	A	nonsynonymous SNV	p.T682N	c.C2045A	M	M	0.5956	0.4103	-0.1853	Germline	1.05864e-05	rs12674488
	1093	WES_Data2	SPAG11B	8	7308386	7308386	T	C	nonsynonymous SNV	p.H31R	c.A92G	Y	Y	0.3282	0.5271	0.1989	Germline	0.00088765	rs1042797	COSM4590573
	1094	WES_Data2	DEFB104A;DEFB104B	8	7694034	7694034	A	G	nonsynonymous SNV	p.I10V	c.A28G	R	R	0.25	0.5213	0.2713	Germline	4.56707e-05	rs2680507	COSM248925
	1095	WES_Data2	PRAG1	8	8176554	8176554	C	T	nonsynonymous SNV	p.A1111T	c.G3331A	Y	Y	0.3077	0.4973	0.1896	Germline	3.71819e-07	rs12549973	COSM3763417
	1096	WES_Data2	PRAG1	8	8234714	8234714	C	T	nonsynonymous SNV	p.R402Q	c.G1205A	Y	Y	0.3105	0.4378	0.1273	Germline	0.00725557	rs3896980	COSM3763424
	1097	WES_Data2	CLDN23	8	8560602	8560602	C	T	nonsynonymous SNV	p.P232S	c.C694T	Y	Y	0.3493	0.5459	0.1966	Germline	3.97498e-05	rs2280560	COSM3750136
	1098	WES_Data2	ERI1	8	8860620	8860620	T	C	nonsynonymous SNV	p.L16P	c.T47C	Y	Y	0.325	0.489	0.164	Germline	0.000406712	rs2288672	COSM3750139
	1099	WES_Data2	RP1L1	8	10464755	10464755	C	T	nonsynonymous SNV	p.G2285R	c.G6853A	Y	Y	0.331	0.4872	0.1562	Germline	7.3456e-05	rs55642448	COSM453780
	1100	WES_Data2	RP1L1	8	10466482	10466482	G	A	nonsynonymous SNV	p.A1709V	c.C5126T	R	R	0.6891	0.5	-0.1891	Germline	0.00141049	rs13267180	COSM3762976
	1101	WES_Data2	RP1L1	8	10467124	10467124	G	C	nonsynonymous SNV	p.P1495R	c.C4484G	S	S	0.3072	0.4623	0.1551	Germline	6.56844e-05	rs4841399	COSM453785
	1102	WES_Data2	RP1L1	8	10468172	10468172	G	A	nonsynonymous SNV	p.R1146W	c.C3436T	R	R	0.3251	0.4559	0.1308	Germline	6.70689e-06	rs4840502	COSM1453857
	1103	WES_Data2	RP1L1	8	10469233	10469233	A	G	nonsynonymous SNV	p.L792P	c.T2375C	R	R	0.7007	0.4512	-0.2495	Germline	1.01332e-05	rs35602868	COSM3762980
	1104	WES_Data2	RP1L1	8	10470068	10470068	C	T	nonsynonymous SNV	p.G514S	c.G1540A	Y	Y	0.7211	0.5091	-0.212	Germline	9.32568e-05	rs74990397	COSM1319774
	1105	WES_Data2	SLC35G5	8	11188743	11188743	C	T	nonsynonymous SNV	p.A43V	c.C128T	Y	Y	0.2959	0.4545	0.1586	Germline	0.0155439	rs13260331	COSM4162596
	1106	WES_Data2	SLC35G5	8	11188752	11188752	G	A	nonsynonymous SNV	p.G46D	c.G137A	R	R	0.2925	0.4808	0.1883	Germline	0.00380887	rs6990563	COSM4162597
	1107	WES_Data2	FAM167A	8	11301601	11301601	G	C	nonsynonymous SNV	p.T107S	c.C320G	S	S	0.6849	0.5219	-0.163	Germline	0.000299365	rs3021512	COSM4162602
	1108	WES_Data2	GATA4	8	11614575	11614575	A	G	nonsynonymous SNV	p.S378G	c.A1132G	R	R	0.6865	0.4982	-0.1883	Germline	6.93091e-06	rs3729856	COSM3763007
	1109	WES_Data2	FDFT1	8	11666337	11666337	A	G	nonsynonymous SNV	p.K104R	c.A311G	R	R	0.6457	0.5017	-0.144	Germline	0.000453365	rs4731	COSM3763008
	1110	WES_Data2	USP17L2	8	11994957	11994957	T	C	nonsynonymous SNV	p.K438R	c.A1313G	Y	Y	0.4663	0.6241	0.1578	Germline	0.00345842	rs12543578	COSM4415128
	1111	WES_Data2	KIAA1456	8	12879198	12879198	A	T	nonsynonymous SNV	p.H211L	c.A632T	W	W	0.6419	0.4439	-0.198	Germline	3.13643e-05	rs34995506	COSM3763042
	1112	WES_Data2	MTUS1	8	17612694	17612694	C	G	nonsynonymous SNV	p.W208S	c.G623C	S	S	0.2877	0.4311	0.1434	Germline	0.00582882	rs73206291
	1113	WES_Data2	PSD3	8	18729496	18729496	G	A	nonsynonymous SNV	p.P293L	c.C878T	R	R	0.2674	0.5	0.2326	Germline	4.6641e-06	rs13263453	COSM3763237
	1114	WES_Data2	SH2D4A	8	19221700	19221700	G	A	nonsynonymous SNV	p.S230N	c.G689A	R	R	0.3043	0.5031	0.1988	Germline	0.000213776	rs34608771	COSM5034179
	1115	WES_Data2	LPL	8	19819724	19819724	C	G	stopgain	p.S474X	c.C1421G	S	S	0.6387	0.4545	-0.1842	Germline	0.00056781	rs328	COSM4986874
	1116	WES_Data2	SLC18A1	8	20036827	20036827	C	G	nonsynonymous SNV	p.S98T	c.G293C	S	S	0.2975	0.5159	0.2184	Germline	2.23007e-09	rs2270637	COSM1455977
	1117	WES_Data2	SLC18A1	8	20038466	20038466	T	G	nonsynonymous SNV	p.T4P	c.A10C	K	K	0.7117	0.454	-0.2577	Germline	1.80706e-06	rs2270641	COSM330538
	1118	WES_Data2	GFRA2	8	21550800	21550800	A	T	nonsynonymous SNV	p.L329Q	c.T986A	W	W	0.3808	0.5196	0.1388	Germline	5.96166e-06	rs1128397	COSM3982465
	1119	WES_Data2	FAM160B2	8	21956108	21956108	A	G	nonsynonymous SNV	p.T315A	c.A943G	R	R	0.6524	0.4851	-0.1673	Germline	6.4959e-06	rs35497596	COSM454296
	1120	WES_Data2	NUDT18	8	21965113	21965113	T	C	nonsynonymous SNV	p.M224V	c.A670G	Y	Y	0.3385	0.5074	0.1689	Germline	1.04529e-06	rs3739435
	1121	WES_Data2	SLC39A14	8	22262321	22262321	T	C	nonsynonymous SNV	p.L33P	c.T98C	Y	Y	0.3025	0.4667	0.1642	Germline	5.96684e-06	rs896378	COSM5000703
	1122	WES_Data2	PDLIM2	8	22436681	22436681	C	T	nonsynonymous SNV	p.P130L	c.C389T	T	Y	0.8	0.4167	-0.3833	Germline	0.00299978	rs11545016
	1123	WES_Data2	TNFRSF10B	8	22926313	22926313	G	A	nonsynonymous SNV	p.P32L	c.C95T	R	R	0.3114	0.4679	0.1565	Germline	0.000485392	rs1129424
	1124	WES_Data2	R3HCC1	8	23146095	23146095	A	G	nonsynonymous SNV	p.H20R	c.A59G	R	R	0.6545	0.4899	-0.1646	Germline	8.02467e-05	rs11546682	COSM4162924
	1125	WES_Data2	LOXL2	8	23167353	23167353	T	G	nonsynonymous SNV	p.M570L	c.A1708C	K	K	0.2583	0.4306	0.1723	Germline	0.00252099	rs1063582
	1126	WES_Data2	SLC25A37	8	23423669	23423669	A	G	nonsynonymous SNV	p.I87V	c.A259G	R	R	0.2886	0.4346	0.146	Germline	0.00136482	rs2942194	COSM3763267
	1127	WES_Data2	SLC25A37	8	23423697	23423697	G	A	nonsynonymous SNV	p.R96Q	c.G287A	R	R	0.7056	0.524	-0.1816	Germline	6.22796e-05	rs3736032
	1128	WES_Data2	ADAM28	8	24208750	24208750	T	C	nonsynonymous SNV	p.L702P	c.T2105C	Y	Y	0.3379	0.5478	0.2099	Germline	0.000183568	rs147942437
	1129	WES_Data2	ADAMDEC1	8	24261526	24261526	A	G	nonsynonymous SNV	p.N365S	c.A1094G	R	R	0.3143	0.4808	0.1665	Germline	0.00141	rs3765124
	1130	WES_Data2	CDCA2	8	25364331	25364331	G	A	nonsynonymous SNV	p.V702I	c.G2104A	R	R	0.7241	0.4848	-0.2393	Germline	0.000269531	rs4872318	COSM3763276
	1131	WES_Data2	ADRA1A	8	26628028	26628028	A	G	nonsynonymous SNV	p.C347R	c.T1039C	R	R	0.6231	0.4883	-0.1348	Germline	0.00031827	rs1048101
	1132	WES_Data2	PTK2B	8	27308585	27308585	A	C	nonsynonymous SNV	p.K796T	c.A2387C	M	M	0.6953	0.4342	-0.2611	Germline	8.99886e-06	rs751019
	1133	WES_Data2	EPHX2	8	27373865	27373865	G	A	nonsynonymous SNV	p.R221Q	c.G662A	R	R	0.3267	0.4968	0.1701	Germline	1.27717e-05	rs751141	COSM3763288
	1134	WES_Data2	SCARA5	8	27767231	27767231	C	G	nonsynonymous SNV	p.D316H	c.G946C	S	S	0.6463	0.4332	-0.2131	Germline	1.476e-06	rs17058207	COSM3763295
	1135	WES_Data2	NUGGC	8	27925185	27925185	G	A	nonsynonymous SNV	p.A186V	c.C557T	R	R	0.6444	0.4662	-0.1782	Germline	0.00186951	rs74462442	COSM3763298
	1136	WES_Data2	NUGGC	8	27925204	27925204	T	C	nonsynonymous SNV	p.S180G	c.A538G	Y	Y	0.3417	0.5324	0.1907	Germline	0.00151053	rs4732620	COSM3763301
	1137	WES_Data2	FBXO16	8	28304769	28304769	C	T	nonsynonymous SNV	p.M242I	c.G726A	C	Y	0.1684	0.3426	0.1742	Somatic	0.00362927	rs1390963	COSM3763308
	1138	WES_Data2	TEX15	8	30700565	30700565	C	T	nonsynonymous SNV	p.S2373N	c.G7118A	C	Y	0.1981	0.4719	0.2738	Somatic	4.17232e-05	rs61738844
	1139	WES_Data2	WRN	8	30999280	30999280	G	T	nonsynonymous SNV	p.L1074F	c.G3222T	K	K	0.2879	0.4528	0.1649	Germline	0.0475596	rs1801195	COSM3763319
	1140	WES_Data2	FUT10	8	33246591	33246591	G	C	nonsynonymous SNV	p.L368V	c.C1102G	S	S	0.2768	0.4135	0.1367	Germline	0.00191125	rs17855838	COSM3982525
	1141	WES_Data2	MAK16	8	33356074	33356074	A	G	nonsynonymous SNV	p.Q277R	c.A830G	R	R	0.6884	0.4422	-0.2462	Germline	2.15943e-05	rs6468171	COSM5021561
	1142	WES_Data2	TTI2	8	33369944	33369944	T	C	nonsynonymous SNV	p.E63G	c.A188G	Y	Y	0.6422	0.458	-0.1842	Germline	2.83343e-05	rs2304748
	1143	WES_Data2	RAB11FIP1	8	37732225	37732225	G	A	nonsynonymous SNV	p.S477L	c.C1430T	R	R	0.3471	0.4516	0.1045	Germline	0.00565401	rs141536416
	1144	WES_Data2	ADRB3	8	37823798	37823798	A	G	nonsynonymous SNV	p.W64R	c.T190C	R	R	0.3101	0.4511	0.141	Germline	0.000858098	rs4994	COSM4985656
	1145	WES_Data2	IDO2	8	39862881	39862881	C	T	nonsynonymous SNV	p.R248W	c.C742T	Y	Y	0.34	0.461	0.121	Germline	0.0207806	rs10109853	COSM3763339
	1146	WES_Data2	IDO2	8	39872935	39872935	T	A	stopgain	p.Y359X	c.T1077A	W	W	0.3519	0.4733	0.1214	Germline	0.000302903	rs4503083	COSM3763342
	1147	WES_Data2	ZMAT4	8	40438757	40438757	T	C	nonsynonymous SNV	p.T125A	c.A373G	Y	Y	0.6649	0.4493	-0.2156	Germline	1.32575e-05	rs17851751	COSM1179839
	1148	WES_Data2	PCMTD1	8	52733050	52733050	T	A	nonsynonymous SNV	p.N236I	c.A707T	T	W	0.1304	0.44	0.3096	Somatic	0.0193518	rs12335014	COSM5453067
	1149	WES_Data2	RP1	8	55539395	55539395	A	T	nonsynonymous SNV	p.N985Y	c.A2953T	W	W	0.65	0.459	-0.191	Germline	0.0020743	rs2293869	COSM3763361
	1150	WES_Data2	TGS1	8	56698370	56698370	C	G	nonsynonymous SNV	p.L87V	c.C259G	S	S	0.6048	0.4222	-0.1826	Germline	4.87491e-06	rs112242681
	1151	WES_Data2	MTFR1	8	66620110	66620110	A	G	nonsynonymous SNV	p.D233G	c.A698G	R	R	0.211	0.4495	0.2385	Germline	0.000143782	rs151130367
	1152	WES_Data2	PDE7A	8	66692011	66692011	C	T	nonsynonymous SNV	p.G76E	c.G227A	Y	Y	0.6847	0.48	-0.2047	Germline	0.00111575	rs11557049
	1153	WES_Data2	RRS1	8	67341743	67341743	A	G	nonsynonymous SNV	p.K126R	c.A377G	R	R	0.3191	0.5115	0.1924	Germline	6.23679e-07	rs3739335
	1154	WES_Data2	ADHFE1	8	67380528	67380528	T	C	nonsynonymous SNV	p.C449R	c.T1345C	Y	Y	0.2047	0.4793	0.2746	Germline	6.63344e-08	rs1060242	COSM4006948
	1155	WES_Data2	TCF24	8	67860369	67860369	C	T	nonsynonymous SNV	p.G141S	c.G421A	Y	Y	0.2616	0.3659	0.1043	Germline	0.0259599	rs112859779
	1156	WES_Data2	CSPP1	8	68074137	68074137	G	A	nonsynonymous SNV	p.R527H	c.G1580A	R	R	0.3265	0.5789	0.2524	Germline	0.0161624	rs16933182
	1157	WES_Data2	CSPP1	8	68102977	68102977	T	C	nonsynonymous SNV	p.W755R	c.T2263C	Y	Y	0.2735	0.4742	0.2007	Germline	1.68585e-05	rs1808140
	1158	WES_Data2	SBSPON	8	74005131	74005131	A	G	nonsynonymous SNV	p.F58L	c.T172C	R	R	0.2756	0.4422	0.1666	Germline	0.00167084	rs59331088	COSM3774337
	1159	WES_Data2	ZFHX4	8	77776091	77776091	C	T	nonsynonymous SNV	p.P3381S	c.C10141T	C	Y	0	0.5238	0.5238	Somatic	1.06902e-25	rs550649829
	1160	WES_Data2	LRRCC1	8	86027418	86027418	A	G	nonsynonymous SNV	p.T117A	c.A349G	R	R	0.2404	0.4545	0.2141	Germline	0.00105885	rs3736038
	1161	WES_Data2	CA3	8	86351997	86351997	G	A	nonsynonymous SNV	p.V31I	c.G91A	R	R	0.7143	0.4836	-0.2307	Germline	6.15369e-08	rs20571	COSM3982611
	1162	WES_Data2	C8orf87	8	94146656	94146656	G	T	nonsynonymous SNV	p.A58E	c.C173A	K	K	0.3478	0.4481	0.1003	Germline	0.044286	rs13267247
	1163	WES_Data2	TMEM67	8	94808165	94808165	A	G	nonsynonymous SNV	p.I604V	c.A1810G	R	R	0.3182	0.4578	0.1396	Germline	0.0428152	rs3134031	COSM3763456
	1164	WES_Data2	UQCRB	8	97243634	97243634	G	A	nonsynonymous SNV	p.P123L	c.C368T	R	R	0.3223	0.5	0.1777	Germline	1.93178e-05	rs36123415
	1165	WES_Data2	MATN2	8	98943598	98943598	C	T	nonsynonymous SNV	p.T187M	c.C560T	Y	Y	0.6384	0.482	-0.1564	Germline	1.36114e-07	rs2290472	COSM4006995
	1166	WES_Data2	POP1	8	99170404	99170404	C	G	nonsynonymous SNV	p.L994V	c.C2980G	S	S	0.6455	0.4828	-0.1627	Germline	1.32911e-05	rs17856355
	1167	WES_Data2	VPS13B	8	100865836	100865836	G	A	nonsynonymous SNV	p.G3432R	c.G10294A	R	R	0.6805	0.4959	-0.1846	Germline	1.97045e-07	rs6468694	COSM3762948
	1168	WES_Data2	SNX31	8	101608919	101608919	T	C	nonsynonymous SNV	p.Q309R	c.A926G	Y	Y	0.3227	0.5354	0.2127	Germline	9.6379e-09	rs2248609	COSM3762955
	1169	WES_Data2	FZD6	8	104337367	104337367	A	C	nonsynonymous SNV	p.M40L	c.A118C	M	M	0.7286	0.466	-0.2626	Germline	5.20639e-08	rs3808553	COSM3762967
	1170	WES_Data2	SLC25A32	8	104417045	104417045	C	T	nonsynonymous SNV	p.R117H	c.G350A	Y	Y	0.3429	0.4948	0.1519	Germline	0.0202398	rs17803441
	1171	WES_Data2	DCAF13	8	104427359	104427359	A	C	nonsynonymous SNV	p.R47S	c.A141C	M	M	0.3209	0.4617	0.1408	Germline	2.10114e-09	rs3134295	COSM453777
	1172	WES_Data2	NUDCD1	8	110301998	110301998	T	C	nonsynonymous SNV	p.I240V	c.A718G	Y	Y	0.3169	0.5185	0.2016	Germline	0.00100437	rs2980618	COSM3762988
	1173	WES_Data2	NUDCD1	8	110302047	110302047	T	G	nonsynonymous SNV	p.L223F	c.A669C	K	K	0.3118	0.5108	0.199	Germline	0.000222184	rs2980619	COSM3762989
	1174	WES_Data2	CSMD3	8	114186003	114186003	T	C	nonsynonymous SNV	p.I219M	c.A657G	Y	Y	0.6753	0.4294	-0.2459	Germline	6.72346e-06	rs2219898	COSM4767506
	1175	WES_Data2	DEPTOR	8	121061879	121061879	G	A	nonsynonymous SNV	p.S288N	c.G863A	R	R	0.6441	0.4696	-0.1745	Germline	6.82925e-08	rs4871827	COSM3736458
	1176	WES_Data2	COL14A1	8	121228679	121228679	A	C	nonsynonymous SNV	p.N563H	c.A1687C	M	M	0.2341	0.4559	0.2218	Germline	1.73336e-06	rs4870723	COSM1569216
	1177	WES_Data2	KLHL38	8	124664113	124664113	T	A	nonsynonymous SNV	p.N352Y	c.A1054T	W	W	0.3636	0.4767	0.1131	Germline	0.000138006	rs11784175	COSM150536
	1178	WES_Data2	FER1L6	8	125076589	125076589	T	G	nonsynonymous SNV	p.D1110E	c.T3330G	K	K	0.3478	0.4645	0.1167	Germline	0.0279861	rs7012186	COSM5431638
	1179	WES_Data2	HHLA1	8	133092138	133092138	G	A	nonsynonymous SNV	p.P251L	c.C752T	R	R	0.6851	0.4766	-0.2085	Germline	8.99904e-10	rs2403730	COSM150545
	1180	WES_Data2	KCNQ3	8	133141816	133141816	G	A	nonsynonymous SNV	p.S651L	c.C1952T	G	R	0	0.234	0.234	Somatic	8.35253e-41	rs372002816	COSM1330311
	1181	WES_Data2	LRRC6	8	133584558	133584558	A	G	nonsynonymous SNV	p.I384T	c.T1151C	R	R	0.6617	0.4462	-0.2155	Germline	0.00033275	rs9297853
	1182	WES_Data2	TG	8	133900252	133900252	T	G	nonsynonymous SNV	p.S734A	c.T2200G	K	K	0.6724	0.4585	-0.2139	Germline	7.79291e-09	rs180223	COSM4162675
	1183	WES_Data2	TG	8	133909974	133909974	A	G	nonsynonymous SNV	p.M1028V	c.A3082G	R	R	0.6619	0.4918	-0.1701	Germline	2.29645e-05	rs853326	COSM4162676
	1184	WES_Data2	ZFAT	8	135649848	135649848	G	A	nonsynonymous SNV	p.P90S	c.C268T	R	R	0.2905	0.4286	0.1381	Germline	0.00429436	rs12541381	COSM5425544
	1185	WES_Data2	FAM135B	8	139165289	139165289	T	C	nonsynonymous SNV	p.I477V	c.A1429G	Y	Y	0.3072	0.4315	0.1243	Germline	0.0154973	rs7835830
	1186	WES_Data2	GPR20	8	142367335	142367335	T	C	nonsynonymous SNV	p.H230R	c.A689G	Y	Y	0.6667	0.4983	-0.1684	Germline	2.27917e-05	rs10875472	COSM3763064
	1187	WES_Data2	JRK	8	143746050	143746050	C	T	nonsynonymous SNV	p.G476R	c.G1426A	Y	Y	0.6061	0.4609	-0.1452	Germline	0.00181669	rs2976399	COSN23013007
	1188	WES_Data2	LY6D	8	143867905	143867905	C	T	nonsynonymous SNV	p.A10T	c.G28A	Y	Y	0.3564	0.4871	0.1307	Germline	0.00468558	rs2572925	COSM5764035
	1189	WES_Data2	CYP11B2	8	143994266	143994266	A	G	nonsynonymous SNV	p.V386A	c.T1157C	R	R	0.6949	0.5165	-0.1784	Germline	1.77138e-06	rs61757294	COSM4162722
	1190	WES_Data2	CYP11B2	8	143996539	143996539	T	C	nonsynonymous SNV	p.K173R	c.A518G	Y	Y	0.2805	0.4653	0.1848	Germline	1.91604e-12	rs4539	COSM4006860
	1191	WES_Data2	C8orf31	8	144124609	144124609	T	C	nonsynonymous SNV	p.L39P	c.T116C	Y	Y	0.6734	0.4781	-0.1953	Germline	1.25806e-09	rs11136300	COSM4162724
	1192	WES_Data2	GPIHBP1	8	144295183	144295183	G	T	nonsynonymous SNV	p.C14F	c.G41T	K	K	0.6717	0.5132	-0.1585	Germline	0.000625617	rs11538389
	1193	WES_Data2	ZFP41	8	144332248	144332248	A	G	nonsynonymous SNV	p.I80V	c.A238G	R	R	0.2919	0.5224	0.2305	Germline	1.83543e-13	rs147227382
	1194	WES_Data2	TOP1MT	8	144392368	144392368	G	A	nonsynonymous SNV	p.R427W	c.C1279T	R	R	0.379	0.4961	0.1171	Germline	0.00670416	rs2293925	COSM4162725
	1195	WES_Data2	CCDC166	8	144789994	144789994	C	A	stopgain	p.E96X	c.G286T	M	M	0.3709	0.5388	0.1679	Germline	0.00018965	rs782021652
	1196	WES_Data2	PARP10	8	145057868	145057868	A	G	nonsynonymous SNV	p.V642A	c.T1925C	R	R	0.2687	0.52	0.2513	Germline	2.72146e-05	rs11544989	COSM3774328
	1197	WES_Data2	SCRT1	8	145557497	145557497	A	C	nonsynonymous SNV	p.S133A	c.T397G	A	M	0	0.2381	0.2381	Somatic	0.046683	rs7013127	COSM4162842
	1198	WES_Data2	ADCK5	8	145603114	145603114	A	C	nonsynonymous SNV	p.R17S	c.A51C	M	M	0.3085	0.4962	0.1877	Germline	3.171e-05	rs6599528	COSM150567
	1199	WES_Data2	SLC39A4	8	145639726	145639726	T	C	nonsynonymous SNV	p.T332A	c.A994G	Y	Y	0.6514	0.4967	-0.1547	Germline	0.000106759	rs2272662	COSM1132811
	1200	WES_Data2	PPP1R16A	8	145726627	145726627	G	A	nonsynonymous SNV	p.D385N	c.G1153A	R	R	0.6791	0.45	-0.2291	Germline	6.36693e-07	.
	1201	WES_Data2	GPT	8	145729727	145729727	C	A	nonsynonymous SNV	p.H14N	c.C40A	M	M	0.7031	0.4348	-0.2683	Germline	2.04575e-09	rs1063739	COSM3763201
	1202	WES_Data2	RECQL4	8	145737816	145737816	C	T	nonsynonymous SNV	p.R1005Q	c.G3014A	Y	Y	0.6863	0.5098	-0.1765	Germline	8.69175e-08	rs4251691	COSM1569133
	1203	WES_Data2	RECQL4	8	145741702	145741702	C	G	nonsynonymous SNV	p.E267D	c.G801C	S	S	0.686	0.4175	-0.2685	Germline	2.97719e-08	rs4244612	COSM3763202
	1204	WES_Data2	ZNF517	8	146032842	146032842	G	A	nonsynonymous SNV	p.V174M	c.G520A	R	R	0.3434	0.4799	0.1365	Germline	0.000243221	rs62531506	COSM4162867
	1205	WES_Data2	C9orf66	9	214864	214864	C	T	nonsynonymous SNV	p.R178Q	c.G533A	Y	Y	0.4048	0.5252	0.1204	Germline	0.00375979	rs2236547	COSM1569322
	1206	WES_Data2	C9orf66	9	215057	215057	T	C	nonsynonymous SNV	p.N114D	c.A340G	Y	Y	0.4385	0.6559	0.2174	Germline	0.00101211	rs481905	COSM4163706
	1207	WES_Data2	CNTNAP3	9	39118205	39118205	G	T	nonsynonymous SNV	p.S711Y	c.C2132A	K	K	0.2553	0.4615	0.2062	Germline	0.0382946	rs10974151	COSM4590744
	1208	WES_Data2	WNK2	9	96021312	96021312	G	A	nonsynonymous SNV	p.V828M	c.G2482A	R	R	0.4902	0.6322	0.142	Germline	0.0348333	rs10761203	COSM456261
	1209	WES_Data2	SVEP1	9	113192655	113192655	T	G	nonsynonymous SNV	p.E1810A	c.A5429C	K	K	0.3739	0.5679	0.194	Germline	0.00549746	rs2986671	COSM150669
	1210	WES_Data2	COL27A1	9	116931445	116931445	T	C	nonsynonymous SNV	p.I537T	c.T1610C	Y	Y	0.4438	0.5742	0.1304	Germline	0.0126604	rs2808770
	1211	WES_Data2	ADARB2	10	1230888	1230888	G	T	nonsynonymous SNV	p.N652K	c.C1956A	G	T	0	1	1	Somatic	1.89653e-17	.
	1212	WES_Data2	ADARB2	10	1230968	1230968	C	T	nonsynonymous SNV	p.A626T	c.G1876A	C	T	0	1	1	Somatic	5.8279e-13	rs2271275	COSM1560925
	1213	WES_Data2	AKR1E2	10	4889403	4889403	C	T	stopgain	p.R203X	c.C607T	C	T	0.0256	1	0.9744	Somatic	7.51459e-15	rs12240276	COSM3751806
	1214	WES_Data2	AKR1C3	10	5136651	5136651	C	G	nonsynonymous SNV	p.H5Q	c.C15G	C	G	0	1	1	Somatic	1.45697e-12	rs12529	COSM4144750
	1215	WES_Data2	PRKCQ	10	6527143	6527143	G	A	nonsynonymous SNV	p.P205L	c.C614T	G	A	0.0238	1	0.9762	Somatic	8.27049e-20	rs2236379	COSM3751896
	1216	WES_Data2	ITIH2	10	7780646	7780646	C	G	nonsynonymous SNV	p.P674A	c.C2020G	C	G	0	1	1	Somatic	1.03488e-55	rs3740217	COSM3998095
	1217	WES_Data2	USP6NL	10	11505189	11505189	C	T	nonsynonymous SNV	p.A597T	c.G1789A	C	T	0.0078	1	0.9922	Somatic	7.1857e-65	.
	1218	WES_Data2	UPF2	10	12046546	12046546	T	C	nonsynonymous SNV	p.N496S	c.A1487G	T	C	0	1	1	Somatic	2.24346e-07	rs7079388	COSM3751555
	1219	WES_Data2	DHTKD1	10	12131081	12131081	T	G	nonsynonymous SNV	p.Y272D	c.T814G	T	G	0	1	1	Somatic	1.63481e-70	rs3740015	COSM3751560
	1220	WES_Data2	C10orf111	10	15138615	15138615	C	T	nonsynonymous SNV	p.R70K	c.G209A	C	T	0.0135	1	0.9865	Somatic	2.88961e-76	rs7896053	COSM4144570
	1221	WES_Data2	RPP38	10	15145855	15145855	C	G	nonsynonymous SNV	p.A181G	c.C542G	C	G	0.0123	1	0.9877	Somatic	1.02317e-32	rs15772
	1222	WES_Data2	RPP38	10	15146061	15146061	C	G	nonsynonymous SNV	p.R250G	c.C748G	C	G	0	1	1	Somatic	2.55702e-10	rs34040166
	1223	WES_Data2	ITGA8	10	15649698	15649698	T	G	nonsynonymous SNV	p.Q566P	c.A1697C	T	G	0	1	1	Somatic	4.00245e-21	rs9333269	COSM146891
	1224	WES_Data2	MALRD1	10	19678449	19678449	A	G	nonsynonymous SNV	p.M1586V	c.A4756G	A	G	0.0226	1	0.9774	Somatic	6.63979e-59	rs78832888
	1225	WES_Data2	PLXDC2	10	20506418	20506418	G	A	nonsynonymous SNV	p.V347I	c.G1039A	G	A	0	1	1	Somatic	9.64135e-18	rs3817405	COSM3751681
	1226	WES_Data2	C10orf113	10	21414892	21414892	C	G	nonsynonymous SNV	p.D110H	c.G328C	C	G	0.0065	1	0.9935	Somatic	9.28911e-76	rs625223	COSM3751684
	1227	WES_Data2	PIP4K2A	10	22839628	22839628	T	C	nonsynonymous SNV	p.N192S	c.A575G	T	C	0	1	1	Somatic	2.13364e-07	rs2230469	COSM3751689
	1228	WES_Data2	GPR158	10	25701341	25701341	C	G	nonsynonymous SNV	p.A425G	c.C1274G	C	G	0.0227	1	0.9773	Somatic	1.10534e-21	rs2480345	COSM5618405
	1229	WES_Data2	MYO3A	10	26355992	26355992	A	G	nonsynonymous SNV	p.I348V	c.A1042G	A	G	0.0385	1	0.9615	Somatic	4.80152e-09	rs3824699	COSM4419522
	1230	WES_Data2	MYO3A	10	26357748	26357748	G	A	nonsynonymous SNV	p.V369I	c.G1105A	G	A	0.0137	0.9778	0.9641	Somatic	3.75087e-30	rs3817420	COSM4419717
	1231	WES_Data2	MYO3A	10	26463130	26463130	C	A	nonsynonymous SNV	p.R1313S	c.C3937A	C	A	0.0159	1	0.9841	Somatic	2.89749e-32	rs1999240	COSM5425503
	1232	WES_Data2	PTCHD3	10	27692279	27692279	A	C	nonsynonymous SNV	p.C407G	c.T1219G	A	C	0	1	1	Somatic	1.09133e-18	rs2484180
	1233	WES_Data2	LYZL1	10	29581493	29581493	A	C	nonsynonymous SNV	p.Q108P	c.A323C	A	C	0.0219	1	0.9781	Somatic	2.24451e-132	rs3818551	COSM3747167
	1234	WES_Data2	JCAD	10	30316208	30316208	T	C	nonsynonymous SNV	p.R957G	c.A2869G	T	C	0.0069	1	0.9931	Somatic	1.2784e-74	rs2185724
	1235	WES_Data2	JCAD	10	30336672	30336672	C	T	nonsynonymous SNV	p.E24K	c.G70A	C	T	0.0085	1	0.9915	Somatic	9.51922e-62	rs72810797	COSM3722275
	1236	WES_Data2	GJD4	10	35897304	35897304	C	T	nonsynonymous SNV	p.T288M	c.C863T	C	T	0.04	1	0.96	Somatic	3.20819e-14	rs141883026
	1237	WES_Data2	ANKRD30A	10	37433929	37433929	G	T	nonsynonymous SNV	p.R411M	c.G1232T	G	K	0.0909	0.4444	0.3535	Somatic	0.0434101	rs202149101	COSM3734034
	1238	WES_Data2	ZNF25	10	38241067	38241067	A	C	nonsynonymous SNV	p.N453K	c.T1359G	A	C	0.0526	1	0.9474	Somatic	4.05392e-06	rs1208606	COSM4987063
	1239	WES_Data2	ZNF33A	10	38344700	38344700	C	G	nonsynonymous SNV	p.Q556E	c.C1666G	C	G	0	1	1	Somatic	4.56408e-23	rs2505232
	1240	WES_Data2	ZNF33A	10	38345465	38345465	G	C	nonsynonymous SNV	p.D811H	c.G2431C	G	C	0	1	1	Somatic	1.18803e-15	rs10508862
	1241	WES_Data2	ZNF365	10	64159333	64159333	G	T	nonsynonymous SNV	p.A337S	c.G1009T	K	K	0.4337	0.5455	0.1118	Germline	0.0399173	rs3758490	COSM146943
	1242	WES_Data2	TLL2	10	98157006	98157006	G	A	nonsynonymous SNV	p.L441F	c.C1321T	R	R	0.4867	0.6408	0.1541	Germline	0.015973	rs138680811
	1243	WES_Data2	MUC6	11	1016795	1016795	C	G	nonsynonymous SNV	p.Q2002H	c.G6006C	C	S	0.1968	0.2607	0.0639	Somatic	0.0330603	rs111397691	COSM4597670
	1244	WES_Data2	MUC6	11	1017325	1017325	A	C	nonsynonymous SNV	p.Y1826D	c.T5476G	A	M	0.1793	0.2513	0.072	Somatic	0.0419374	rs55903826	COSM1317403
	1245	WES_Data2	MUC6	11	1017381	1017381	G	C	nonsynonymous SNV	p.T1807S	c.C5420G	S	S	0.2774	0.3789	0.1015	Germline	0.00480251	rs34912894	COSM1180593
	1246	WES_Data2	OR2AG2	11	6790028	6790028	C	G	nonsynonymous SNV	p.R54P	c.G161C	S	S	0.4045	0.5327	0.1282	Germline	0.023727	rs10839616	COSM3998551
	1247	WES_Data2	ABCC8	11	17418477	17418477	C	A	nonsynonymous SNV	p.A1369S	c.G4105T	M	M	0.4828	0.5913	0.1085	Germline	0.0454788	rs757110	COSM5426905
	1248	WES_Data2	DEPDC7	11	33049341	33049341	G	A	nonsynonymous SNV	p.A192T	c.G574A	R	R	0.4062	0.6145	0.2083	Germline	0.00419443	rs34161108
	1249	WES_Data2	OR9G1;OR9G9	11	56468368	56468368	C	T	nonsynonymous SNV	p.R169C	c.C505T	Y	Y	0.381	0.5616	0.1806	Germline	0.017572	rs11228733	COSM4590907
	1250	WES_Data2	OR9G1;OR9G9	11	56468416	56468416	G	A	nonsynonymous SNV	p.E185K	c.G553A	R	R	0.381	0.5278	0.1468	Germline	0.0467154	rs11228735	COSM4145898
	1251	WES_Data2	AHNAK	11	62295361	62295361	C	A	nonsynonymous SNV	p.E2176D	c.G6528T	M	M	0.444	0.5641	0.1201	Germline	0.00819591	rs145871196
	1252	WES_Data2	PGM2L1	11	74109166	74109166	A	G	nonsynonymous SNV	p.L14P	c.T41C	R	R	0.3125	0.5312	0.2187	Germline	0.00979589	rs12049823	COSM429848
	1253	WES_Data2	FAM181B	11	82444216	82444216	C	G	nonsynonymous SNV	p.V186L	c.G556C	S	S	0.3261	0.5763	0.2502	Germline	0.00903256	rs986097	COSM4146373
	1254	WES_Data2	DDIAS	11	82625814	82625814	G	A	nonsynonymous SNV	p.V12I	c.G34A	R	R	0.4286	0.6316	0.203	Germline	0.0124858	rs61902276	COSM3752777
	1255	WES_Data2	OR8B3	11	124266906	124266906	C	T	nonsynonymous SNV	p.M114I	c.G342A	Y	Y	0.4211	0.5302	0.1091	Germline	0.00983923	rs530992	COSM4145441
	1256	WES_Data2	LOC403312	11	125365285	125365285	T	C	nonsynonymous SNV	p.S21P	c.T61C	Y	Y	0.4087	0.5099	0.1012	Germline	0.0198328	rs11220099
	1257	WES_Data2	CRACR2A	12	3788145	3788145	C	T	nonsynonymous SNV	p.E154K	c.G460A	Y	Y	0.3966	0.5352	0.1386	Germline	0.0447545	rs242018	COSM3753205
	1258	WES_Data2	PRB4	12	11461521	11461521	G	T	nonsynonymous SNV	p.H132Q	c.C396A	G	K	0.0435	0.2059	0.1624	Somatic	0.0278376	rs12369220	COSM225897
	1259	WES_Data2	LRP6	12	12279793	12279793	C	A	nonsynonymous SNV	p.V1382F	c.G4144T	M	M	0.4066	0.6	0.1934	Germline	0.00991481	rs139480047
	1260	WES_Data2	PUS7L	12	44148460	44148460	C	A	nonsynonymous SNV	p.V197L	c.G589T	M	M	0.4603	0.6667	0.2064	Germline	0.0376995	rs80277889
	1261	WES_Data2	TMPRSS12	12	51237816	51237816	G	A	nonsynonymous SNV	p.A127T	c.G379A	R	R	0.3697	0.5244	0.1547	Germline	0.021217	rs861204	COSM4147154
	1262	WES_Data2	ESPL1	12	53682457	53682457	G	A	nonsynonymous SNV	p.R1561Q	c.G4682A	R	R	0.494	0.6575	0.1635	Germline	0.0286302	rs56358776	COSM3998854
	1263	WES_Data2	SLC26A10	12	58015494	58015494	G	A	nonsynonymous SNV	p.A193T	c.G577A	R	R	0.3898	0.551	0.1612	Germline	0.0128536	rs923828	COSM3753419
	1264	WES_Data2	TMPO	12	98927830	98927830	C	G	nonsynonymous SNV	p.Q599E	c.C1795G	S	S	0.3987	0.5385	0.1398	Germline	0.0187157	rs17459334
	1265	WES_Data2	APPL2	12	105583877	105583877	G	A	nonsynonymous SNV	p.A439V	c.C1316T	R	R	0.3731	0.5593	0.1862	Germline	0.0276899	rs2272495	COSM3752860
	1266	WES_Data2	DDX54	12	113623255	113623255	A	C	startloss	p.A3_A18del	c.T2G	A	M	0	0.2105	0.2105	Somatic	0.0143171	.
	1267	WES_Data2	OR4K2	14	20345346	20345346	A	T	nonsynonymous SNV	p.N307I	c.A920T	W	W	0.48	0.7407	0.2607	Germline	0.0495302	rs12883767	COSM3753844
	1268	WES_Data2	MIA2	14	39717040	39717040	C	A	nonsynonymous SNV	p.P421H	c.C1262A	C	M	0	0.52	0.52	Somatic	6.25589e-13	.	COSM4702071
	1269	WES_Data2	ACOT2	14	74036500	74036500	C	T	nonsynonymous SNV	p.R186W	c.C556T	Y	Y	0.3111	0.5952	0.2841	Germline	0.00698214	rs146968042	COSM3690183
	1270	WES_Data2	TSHR	14	81575005	81575005	C	A	nonsynonymous SNV	p.R248S	c.C742A	M	M	0.3333	0.6604	0.3271	Germline	0.000656751	rs3783941
	1271	WES_Data2	SERPINA11	14	94912896	94912896	T	G	nonsynonymous SNV	p.E230A	c.A689C	K	K	0.4412	0.581	0.1398	Germline	0.0214667	rs1885137	COSM3754197
	1272	WES_Data2	APOPT1	14	104029378	104029378	C	G	nonsynonymous SNV	p.P27A	c.C79G	S	S	0.3922	0.6667	0.2745	Germline	0.0151653	rs2274268	COSM4147845
	1273	WES_Data2	SPTBN5	15	42149596	42149596	C	G	nonsynonymous SNV	p.G2821R	c.G8461C	S	S	0.3789	0.5342	0.1553	Germline	0.0320675	rs1197675	COSM4998602
	1274	WES_Data2	PLA2G4D	15	42363480	42363480	G	A	nonsynonymous SNV	p.R573W	c.C1717T	R	R	0.418	0.5408	0.1228	Germline	0.0466868	rs17747505
	1275	WES_Data2	TRIM69	15	45059557	45059557	A	G	nonsynonymous SNV	p.S127G	c.A379G	A	R	0	0.398	0.398	Somatic	4.33178e-16	.
	1276	WES_Data2	SLC27A2	15	50474766	50474766	A	C	nonsynonymous SNV	p.K48Q	c.A142C	M	M	0.5598	0.3784	-0.1814	Germline	7.35326e-05	rs1648348	COSM3754349
	1277	WES_Data2	SH2D7	15	78390909	78390909	C	T	nonsynonymous SNV	p.R206W	c.C616T	Y	Y	0.292	0.4818	0.1898	Germline	0.00169965	rs12593575	COSM3765821
	1278	WES_Data2	AGBL1	15	86702241	86702241	C	T	nonsynonymous SNV	p.R158C	c.C472T	Y	Y	0.3929	0.5882	0.1953	Germline	0.0336956	rs79814209
	1279	WES_Data2	FANCI	15	89838318	89838318	A	T	nonsynonymous SNV	p.I877L	c.A2629T	W	W	0.36	0.5246	0.1646	Germline	0.0398001	rs35875311	COSM3754559
	1280	WES_Data2	ANPEP	15	90335788	90335788	C	T	nonsynonymous SNV	p.S752N	c.G2255A	Y	Y	0.4296	0.5664	0.1368	Germline	0.0217104	rs25651	COSM4128567
	1281	WES_Data2	ANPEP	15	90347814	90347814	G	A	nonsynonymous SNV	p.A311V	c.C932T	R	R	0.3553	0.4593	0.104	Germline	0.0473007	rs17240268
	1282	WES_Data2	PIGQ	16	633125	633125	T	C	nonsynonymous SNV	p.C592R	c.T1774C	Y	Y	0.4578	0.5837	0.1259	Germline	0.00473259	rs1045277	COSM435483
	1283	WES_Data2	MAPK8IP3	16	1816338	1816338	G	A	nonsynonymous SNV	p.R909Q	c.G2726A	R	R	0.431	0.5476	0.1166	Germline	0.0132203	rs201418752
	1284	WES_Data2	MEFV	16	3304463	3304463	C	T	nonsynonymous SNV	p.R202Q	c.G605A	Y	Y	0.4014	0.5547	0.1533	Germline	0.0077135	rs224222	COSM3749364
	1285	WES_Data2	TEKT5	16	10769943	10769943	G	A	nonsynonymous SNV	p.A320V	c.C959T	R	R	0.5836	0.4534	-0.1302	Germline	0.0014697	rs78451460
	1286	WES_Data2	NOMO1	16	14988868	14988868	A	G	nonsynonymous SNV	p.E1153G	c.A3458G	R	R	0.36	0.5833	0.2233	Germline	0.0218415	rs62038492	COSM3726975
	1287	WES_Data2	ACSM5	16	20422874	20422874	A	G	nonsynonymous SNV	p.H23R	c.A68G	R	R	0.3897	0.5466	0.1569	Germline	0.00178673	rs144606521
	1288	WES_Data2	ACSM5	16	20422879	20422879	A	C	nonsynonymous SNV	p.K25Q	c.A73C	M	M	0.3894	0.5355	0.1461	Germline	0.00390255	rs148462851
	1289	WES_Data2	RBL2	16	53481010	53481010	A	G	nonsynonymous SNV	p.Y210C	c.A629G	R	R	0.25	0.6111	0.3611	Germline	0.0161699	rs17800727	COSM4129114
	1290	WES_Data2	LOC729159	16	60392555	60392555	G	A	nonsynonymous SNV	p.P351L	c.C1052T	R	R	0.4471	0.6216	0.1745	Germline	0.0204614	rs11648584
	1291	WES_Data2	PDPR	16	70182390	70182390	T	G	nonsynonymous SNV	p.N562K	c.T1686G	K	K	0.3421	0.4639	0.1218	Germline	0.00441308	rs62050978	COSM3742010
	1292	WES_Data2	HYDIN	16	70986455	70986455	T	A	nonsynonymous SNV	p.T2134S	c.A6400T	T	W	0	0.5068	0.5068	Somatic	4.78807e-19	.	COSM4062446
	1293	WES_Data2	NPIPB15	16	74425769	74425769	C	T	nonsynonymous SNV	p.R375W	c.C1123T	C	Y	0.1066	0.2108	0.1042	Somatic	0.00475891	rs200486331	COSM4129350
	1294	WES_Data2	LGALS9	17	25970633	25970633	G	A	nonsynonymous SNV	p.G176E	c.G527A	R	R	0.4205	0.5857	0.1652	Germline	0.0283054	rs361497	COSM4000069
	1295	WES_Data2	ARL5C	17	37319029	37319029	T	G	nonsynonymous SNV	p.M64L	c.A190C	K	K	0.4583	0.6111	0.1528	Germline	0.014675	rs544198	COSM5505523
	1296	WES_Data2	KRT10	17	38975328	38975328	G	A	nonsynonymous SNV	p.H487Y	c.C1459T	R	A	0.6875	0.9412	0.2537	LOH	0.0420695	rs17855579	COSM4597140
	1297	WES_Data2	KRT40	17	39135084	39135084	A	G	nonsynonymous SNV	p.W390R	c.T1168C	R	R	0.4151	0.6098	0.1947	Germline	0.0477988	rs8064733	COSM3755484
	1298	WES_Data2	KRT32	17	39619094	39619094	T	C	nonsynonymous SNV	p.N402S	c.A1205G	Y	Y	0.5634	0.2647	-0.2987	Germline	0.00353086	rs2604955
	1299	WES_Data2	KRT35	17	39637244	39637244	A	G	nonsynonymous SNV	p.S36P	c.T106C	R	R	0.4264	0.5575	0.1311	Germline	0.0281116	rs743686
	1300	WES_Data2	HSPB9	17	40274873	40274873	A	C	nonsynonymous SNV	p.Q2P	c.A5C	M	M	0.4296	0.582	0.1524	Germline	0.0094146	rs1122326	COSM3755554
	1301	WES_Data2	KANSL1	17	44248837	44248837	T	C	nonsynonymous SNV	p.N225D	c.A673G	T	Y	0.1901	0.3857	0.1956	Somatic	0.000216895	rs35643216	COSM4778050
	1302	WES_Data2	EME1	17	48456193	48456193	T	C	nonsynonymous SNV	p.I350T	c.T1049C	Y	Y	0.4067	0.5541	0.1474	Germline	0.00410735	rs12450550	COSM148297
	1303	WES_Data2	PCTP	17	53828493	53828493	A	C	nonsynonymous SNV	p.E10A	c.A29C	M	M	0.4554	0.5978	0.1424	Germline	0.0294915	rs12941739
	1304	WES_Data2	TSPOAP1	17	56393840	56393840	G	C	nonsynonymous SNV	p.A585G	c.C1754G	S	S	0.4135	0.5542	0.1407	Germline	0.0384746	rs61739511	COSM4130444
	1305	WES_Data2	C17orf82	17	59489707	59489707	C	T	nonsynonymous SNV	p.A124V	c.C371T	Y	Y	0.4505	0.5615	0.111	Germline	0.0344263	rs77617620	COSM1479816
	1306	WES_Data2	LRRC37A3	17	62892442	62892442	G	C	nonsynonymous SNV	p.P312A	c.C934G	G	S	0.1429	0.2889	0.146	Somatic	0.0483836	rs201370086	COSM4130503
	1307	WES_Data2	DNAI2	17	72308319	72308319	G	A	nonsynonymous SNV	p.A546T	c.G1636A	R	R	0.4571	0.5977	0.1406	Germline	0.0361	rs1979370	COSM4130570
	1308	WES_Data2	TMC6	17	76121318	76121318	G	A	nonsynonymous SNV	p.L153F	c.C457T	R	R	0.3684	0.527	0.1586	Germline	0.0366206	rs12449858	COSM5617953
	1309	WES_Data2	ENGASE	17	77081788	77081788	G	A	nonsynonymous SNV	p.S596N	c.G1787A	R	R	0.6324	0.3265	-0.3059	Germline	0.000976867	rs4789879	COSM5425046
	1310	WES_Data2	ENOSF1	18	712568	712568	G	A	nonsynonymous SNV	p.S7F	c.C20T	R	R	0.6479	0.3717	-0.2762	Germline	0.000218979	rs3786349	COSM3749442
	1311	WES_Data2	LPIN2	18	2937867	2937867	C	A	nonsynonymous SNV	p.A331S	c.G991T	M	M	0.4583	0.323	-0.1353	Germline	0.000743544	rs80338805
	1312	WES_Data2	MYOM1	18	3176040	3176040	C	G	nonsynonymous SNV	p.G341A	c.G1022C	S	S	0.4898	0.6356	0.1458	Germline	0.0218349	rs8099021	COSM5021969
	1313	WES_Data2	MYOM1	18	3188976	3188976	A	G	nonsynonymous SNV	p.S181P	c.T541C	R	R	0.5233	0.644	0.1207	Germline	0.0014649	rs1962519	COSM3756133
	1314	WES_Data2	TGIF1	18	3452030	3452030	C	T	nonsynonymous SNV	p.S18L	c.C53T	Y	Y	0.4615	0.6875	0.226	Germline	0.0185049	rs111896914
	1315	WES_Data2	LAMA1	18	6985270	6985270	C	T	nonsynonymous SNV	p.A1876T	c.G5626A	Y	Y	0.4883	0.3235	-0.1648	Germline	0.000258985	rs11664063	COSM148380
	1316	WES_Data2	LAMA1	18	6993673	6993673	T	C	nonsynonymous SNV	p.I1659V	c.A4975G	Y	Y	0.5361	0.2921	-0.244	Germline	0.000601589	rs62081533	COSM3756201
	1317	WES_Data2	LAMA1	18	7008591	7008591	T	C	nonsynonymous SNV	p.M1340V	c.A4018G	Y	Y	0.4851	0.6174	0.1323	Germline	0.0347409	rs662471
	1318	WES_Data2	LAMA1	18	7034508	7034508	T	G	nonsynonymous SNV	p.N674T	c.A2021C	K	K	0.5231	0.2556	-0.2675	Germline	6.74249e-06	rs566655	COSM3756205
	1319	WES_Data2	MTCL1	18	8784723	8784723	A	G	nonsynonymous SNV	p.D538G	c.A1613G	R	R	0.5056	0.6119	0.1063	Germline	0.0234826	rs3744979	COSM5001994
	1320	WES_Data2	MTCL1	18	8798185	8798185	G	A	nonsynonymous SNV	p.G778S	c.G2332A	R	R	0.5076	0.6178	0.1102	Germline	0.0387297	rs12386117
	1321	WES_Data2	PPP4R1	18	9570320	9570320	T	C	nonsynonymous SNV	p.I470V	c.A1408G	Y	Y	0.5769	0.3402	-0.2367	Germline	0.00141362	rs329003	COSM3736187
	1322	WES_Data2	TXNDC2	18	9887429	9887429	C	T	nonsynonymous SNV	p.P318L	c.C953T	Y	Y	0.3868	0.5385	0.1517	Germline	0.00124669	rs2240908	COSM4000485
	1323	WES_Data2	TXNDC2	18	9887497	9887497	G	A	nonsynonymous SNV	p.E341K	c.G1021A	R	R	0.4924	0.316	-0.1764	Germline	0.000198571	rs11081510
	1324	WES_Data2	TXNDC2	18	9887857	9887857	G	A	nonsynonymous SNV	p.A461T	c.G1381A	R	R	0.4829	0.2908	-0.1921	Germline	1.00108e-05	rs17732496
	1325	WES_Data2	SLC35G4	18	11609727	11609727	C	A	nonsynonymous SNV	p.L45M	c.C133A	M	M	0.4324	0.6786	0.2462	Germline	0.00433511	rs8087289	COSM148386
	1326	WES_Data2	SLC35G4	18	11609811	11609811	G	C	nonsynonymous SNV	p.V73L	c.G217C	S	S	0.3625	0.6488	0.2863	Germline	1.63976e-07	rs8087666	COSM148387
	1327	WES_Data2	SLC35G4	18	11609994	11609994	C	T	nonsynonymous SNV	p.R134C	c.C400T	Y	Y	0.4517	0.6367	0.185	Germline	1.19014e-05	rs75154847	COSM4418761
	1328	WES_Data2	SLC35G4	18	11610001	11610001	A	G	nonsynonymous SNV	p.H136R	c.A407G	R	R	0.4418	0.6374	0.1956	Germline	5.29308e-06	rs79348909	COSM148390
	1329	WES_Data2	SLC35G4	18	11610024	11610024	A	G	nonsynonymous SNV	p.I144V	c.A430G	R	R	0.4507	0.6205	0.1698	Germline	0.000260097	rs80224205	COSM148391
	1330	WES_Data2	SLC35G4	18	11610042	11610042	G	A	nonsynonymous SNV	p.E150K	c.G448A	R	R	0.4684	0.62	0.1516	Germline	0.0018202	rs76699910	COSM148392
	1331	WES_Data2	SLC35G4	18	11610121	11610121	G	A	nonsynonymous SNV	p.G176E	c.G527A	R	R	0.458	0.6	0.142	Germline	0.0178696	rs73943948	COSM148393
	1332	WES_Data2	SLC35G4	18	11610162	11610162	G	A	nonsynonymous SNV	p.G190S	c.G568A	R	R	0.4043	0.5696	0.1653	Germline	0.0217761	rs73943949
	1333	WES_Data2	SLC35G4	18	11610595	11610595	G	A	nonsynonymous SNV	p.G334E	c.G1001A	G	R	0.0833	0.32	0.2367	Somatic	0.0426895	rs200189946	COSM5482770
	1334	WES_Data2	ANKRD62	18	12115509	12115509	G	A	nonsynonymous SNV	p.E406K	c.G1216A	R	R	0.25	0.6571	0.4071	Germline	0.00223478	rs4519391	COSM437907
	1335	WES_Data2	CIDEA	18	12254943	12254943	C	T	nonsynonymous SNV	p.A43V	c.C128T	Y	Y	0.381	0.65	0.269	Germline	0.0130622	.
	1336	WES_Data2	SEH1L	18	12984144	12984144	C	A	nonsynonymous SNV	p.T342N	c.C1025A	M	M	0.4393	0.6696	0.2303	Germline	0.000471562	rs6505776
	1337	WES_Data2	CEP192	18	13056682	13056682	G	A	nonsynonymous SNV	p.V1365M	c.G4093A	R	R	0.439	0.7191	0.2801	Germline	0.000173936	rs2282542	COSM3756076
	1338	WES_Data2	CEP192	18	13068109	13068109	G	A	nonsynonymous SNV	p.R1544H	c.G4631A	R	R	0.3517	0.5854	0.2337	Germline	3.05467e-05	rs7228940	COSM4000374
	1339	WES_Data2	CEP192	18	13068132	13068132	T	C	nonsynonymous SNV	p.S1552P	c.T4654C	Y	Y	0.3725	0.6023	0.2298	Germline	2.72533e-05	rs578208
	1340	WES_Data2	CEP192	18	13095591	13095591	G	A	nonsynonymous SNV	p.R2115Q	c.G6344A	R	R	0.472	0.697	0.225	Germline	8.68904e-05	rs56913743	COSM3756077
	1341	WES_Data2	CEP192	18	13095609	13095609	T	C	nonsynonymous SNV	p.L2121P	c.T6362C	Y	Y	0.4783	0.6772	0.1989	Germline	0.000229468	rs474337
	1342	WES_Data2	CEP192	18	13116432	13116432	G	T	nonsynonymous SNV	p.R2449L	c.G7346T	K	K	0.4676	0.6038	0.1362	Germline	0.0126145	rs1786263	COSM5001134
	1343	WES_Data2	MC5R	18	13826391	13826391	C	G	nonsynonymous SNV	p.F209L	c.C627G	S	S	0.4554	0.6509	0.1955	Germline	3.1376e-05	rs2236700	COSM3756079
	1344	WES_Data2	POTEC	18	14533105	14533105	G	C	nonsynonymous SNV	p.S337C	c.C1010G	S	S	0.5254	0.2414	-0.284	Germline	0.00139737	rs45610131	COSM4130923
	1345	WES_Data2	OSBPL1A	18	21860849	21860849	A	C	nonsynonymous SNV	p.V31G	c.T92G	A	M	0	0.2055	0.2055	Somatic	2.97873e-05	rs751369785
	1346	WES_Data2	MEP1B	18	29795101	29795101	T	C	nonsynonymous SNV	p.S546P	c.T1636C	Y	Y	0.4624	0.3147	-0.1477	Germline	0.00170964	rs233223	COSM4153949
	1347	WES_Data2	MEP1B	18	29797921	29797921	C	T	nonsynonymous SNV	p.P695L	c.C2084T	Y	Y	0.4733	0.6549	0.1816	Germline	0.00180709	rs616114	COSM3756126
	1348	WES_Data2	ASXL3	18	31324766	31324766	G	A	nonsynonymous SNV	p.V1652M	c.G4954A	R	R	0.5203	0.315	-0.2053	Germline	0.000749522	rs17746949
	1349	WES_Data2	ZNF24	18	32917644	32917644	T	C	nonsynonymous SNV	p.N220S	c.A659G	Y	Y	0.5098	0.3025	-0.2073	Germline	0.00132672	rs2032729	COSM3756139
	1350	WES_Data2	ELP2	18	33718326	33718326	A	C	nonsynonymous SNV	p.T128P	c.A382C	M	M	0.5163	0.6368	0.1205	Germline	0.0140323	rs1785934	COSM5000536
	1351	WES_Data2	ELP2	18	33725931	33725931	G	A	nonsynonymous SNV	p.V235M	c.G703A	R	R	0.4255	0.5789	0.1534	Germline	0.0194188	rs1785928	COSM1388588
	1352	WES_Data2	FHOD3	18	34232610	34232610	C	T	nonsynonymous SNV	p.S455L	c.C1364T	Y	Y	0.5676	0.32	-0.2476	Germline	0.00193223	rs2848901	COSN19700191
	1353	WES_Data2	MYO5B	18	47429022	47429022	C	T	nonsynonymous SNV	p.R918H	c.G2753A	C	Y	0.1864	0.3007	0.1143	Somatic	0.00779893	rs2298624	COSM4418079
	1354	WES_Data2	MAPK4	18	48190440	48190440	G	A	nonsynonymous SNV	p.V38M	c.G112A	A	R	0.7675	0.6615	-0.106	Germline	0.000606342	rs3752087	COSM4000421
	1355	WES_Data2	ALPK2	18	56202768	56202768	C	A	nonsynonymous SNV	p.A1551S	c.G4651T	M	M	0.741	0.5779	-0.1631	Germline	0.000397137	rs3809983	COSM3756167
	1356	WES_Data2	ALPK2	18	56204671	56204671	A	T	nonsynonymous SNV	p.N916K	c.T2748A	T	W	0.8066	0.6121	-0.1945	Germline	0.000130454	rs4940404	COSM3756172
	1357	WES_Data2	ALPK2	18	56204932	56204932	T	G	nonsynonymous SNV	p.K829N	c.A2487C	K	K	0.7407	0.5474	-0.1933	Germline	0.000900172	rs3809973	COSM3756173
	1358	WES_Data2	MALT1	18	56363667	56363667	G	A	nonsynonymous SNV	p.R149Q	c.G446A	R	R	0.2169	0.3182	0.1013	Germline	0.0366399	rs147414021
	1359	WES_Data2	TNFRSF11A	18	60027241	60027241	C	T	nonsynonymous SNV	p.A192V	c.C575T	C	Y	0.1657	0.3429	0.1772	Somatic	0.000648515	rs1805034
	1360	WES_Data2	SERPINB11	18	61390332	61390332	C	T	nonsynonymous SNV	p.T118I	c.C353T	C	Y	0.1915	0.3138	0.1223	Somatic	0.00129275	rs1395266	COSM4131061
	1361	WES_Data2	SERPINB11	18	61390361	61390361	T	C	nonsynonymous SNV	p.S128P	c.T382C	Y	Y	0.2058	0.3111	0.1053	Germline	0.0064187	rs1395267	COSM4997967
	1362	WES_Data2	SERPINB8	18	61647069	61647069	G	A	nonsynonymous SNV	p.R68Q	c.G203A	G	R	0.1813	0.3241	0.1428	Somatic	0.00415646	rs1944270	COSM4000452
	1363	WES_Data2	SERPINB8	18	61654463	61654463	A	G	nonsynonymous SNV	p.H179R	c.A536G	A	R	0.164	0.2891	0.1251	Somatic	0.003793	rs3826616	COSM5437808
	1364	WES_Data2	CD226	18	67531642	67531642	T	C	nonsynonymous SNV	p.S152G	c.A454G	T	Y	0.172	0.2636	0.0916	Somatic	0.0424863	rs763361	COSM1179777
	1365	WES_Data2	ZNF407	18	72347230	72347230	T	A	nonsynonymous SNV	p.C1419S	c.T4255A	T	W	0	0.5793	0.5793	Somatic	3.60858e-51	.
	1366	WES_Data2	ZNF443	19	12540971	12540971	T	A	stoploss	p.X672L	c.A2015T	W	W	0.2308	0.439	0.2082	Germline	0.028165	rs28559848	COSM3756323
	1367	WES_Data2	VSTM2B	19	30021023	30021023	G	C	nonsynonymous SNV	p.D199H	c.G595C	G	S	0	0.4219	0.4219	Somatic	1.00102e-08	rs62104163
	1368	WES_Data2	ANKRD27	19	33098632	33098632	G	C	nonsynonymous SNV	p.P761R	c.C2282G	G	S	0.0106	0.3217	0.3111	Somatic	2.32186e-10	rs2302970	COSM3756595
	1369	WES_Data2	ANKRD27	19	33110204	33110204	T	C	nonsynonymous SNV	p.S657G	c.A1969G	T	Y	0	0.3172	0.3172	Somatic	2.034e-20	rs2287669	COSM3756597
	1370	WES_Data2	CEP89	19	33370070	33370070	A	G	stoploss	p.X784Q	c.T2350C	A	R	0.0076	0.34	0.3324	Somatic	2.26024e-13	rs745961	COSM3932992
	1371	WES_Data2	CEP89	19	33370084	33370084	T	A	nonsynonymous SNV	p.H779L	c.A2336T	T	W	0.0066	0.3333	0.3267	Somatic	2.15317e-15	rs745960	COSM1750803
	1372	WES_Data2	CEP89	19	33414420	33414420	A	G	nonsynonymous SNV	p.V398A	c.T1193C	G	R	1	0.557	-0.443	Germline	1.1566e-11	rs4805825
	1373	WES_Data2	FAAP24	19	33467515	33467515	T	C	nonsynonymous SNV	p.I97T	c.T290C	C	Y	1	0.6619	-0.3381	Germline	1.98252e-16	rs3816032
	1374	WES_Data2	PEPD	19	33878837	33878837	G	A	nonsynonymous SNV	p.L394F	c.C1180T	A	R	1	0.7439	-0.2561	Germline	3.3257e-08	rs17570	COSM3756628
	1375	WES_Data2	ZNF302	19	35175208	35175208	A	G	nonsynonymous SNV	p.Y89C	c.A266G	A	R	0	0.2667	0.2667	Somatic	0.0333578	rs2290652	COSM3756634
	1376	WES_Data2	ZNF302	19	35175775	35175775	C	T	nonsynonymous SNV	p.T278I	c.C833T	C	Y	0	0.2113	0.2113	Somatic	6.95935e-06	rs11543232	COSM4000657
	1377	WES_Data2	ZNF30	19	35434238	35434238	A	G	nonsynonymous SNV	p.Q124R	c.A371G	A	R	0.013	0.2	0.187	Somatic	7.45467e-05	rs1811	COSM3932997
	1378	WES_Data2	ZNF30	19	35435006	35435006	G	A	nonsynonymous SNV	p.R380K	c.G1139A	G	R	0.0101	0.2632	0.2531	Somatic	3.29549e-15	rs1345658
	1379	WES_Data2	ZNF30	19	35435069	35435069	A	G	nonsynonymous SNV	p.Y401C	c.A1202G	A	R	0.006	0.25	0.244	Somatic	1.43629e-12	rs765746
	1380	WES_Data2	ZNF792	19	35450229	35450229	C	T	nonsynonymous SNV	p.R177Q	c.G530A	C	Y	0.0034	0.2739	0.2705	Somatic	1.89765e-28	rs2651079	COSM5425291
	1381	WES_Data2	GRAMD1A	19	35487125	35487125	G	A	nonsynonymous SNV	p.A67T	c.G199A	G	R	0	0.4429	0.4429	Somatic	8.47482e-11	rs67018685	COSN8992603
	1382	WES_Data2	SCN1B	19	35524939	35524939	C	A	nonsynonymous SNV	p.S248R	c.C744A	A	M	0.9938	0.6305	-0.3633	Germline	1.81637e-22	rs67701503
	1383	WES_Data2	SCN1B	19	35524944	35524944	G	C	nonsynonymous SNV	p.R250T	c.G749C	C	S	0.9939	0.632	-0.3619	Germline	8.19575e-23	rs67486287
	1384	WES_Data2	FXYD5	19	35660508	35660508	G	A	nonsynonymous SNV	p.R145H	c.G434A	A	R	1	0.6615	-0.3385	Germline	7.14064e-12	rs12110
	1385	WES_Data2	CD22	19	35836530	35836530	G	A	nonsynonymous SNV	p.G568D	c.G1703A	A	R	0.9958	0.6226	-0.3732	Germline	2.23385e-31	rs10406069	COSM4985713
	1386	WES_Data2	GPR42	19	35863180	35863180	A	G	nonsynonymous SNV	p.M307V	c.A919G	A	R	0	0.6343	0.6343	Somatic	1.36979e-30	rs12459836	COSM4597133
	1387	WES_Data2	FFAR2	19	35941248	35941248	T	A	nonsynonymous SNV	p.L211H	c.T632A	T	W	0	0.313	0.313	Somatic	9.33341e-23	rs409093
	1388	WES_Data2	DMKN	19	36003962	36003962	T	C	nonsynonymous SNV	p.N139S	c.A416G	T	Y	0	0.3172	0.3172	Somatic	1.21475e-12	rs7247001
	1389	WES_Data2	DMKN	19	36004106	36004106	A	G	nonsynonymous SNV	p.V91A	c.T272C	A	R	0	0.3033	0.3033	Somatic	5.5782e-25	rs4806163	COSM3756665
	1390	WES_Data2	SBSN	19	36017928	36017928	G	C	nonsynonymous SNV	p.A419G	c.C1256G	C	S	1	0.615	-0.385	Germline	3.64781e-25	rs10775583	COSM5445684
	1391	WES_Data2	THAP8	19	36526362	36526362	T	C	nonsynonymous SNV	p.T228A	c.A682G	C	Y	0.9958	0.5784	-0.4174	Germline	1.67094e-36	rs140352604
	1392	WES_Data2	THAP8	19	36530332	36530332	G	A	nonsynonymous SNV	p.R146W	c.C436T	A	R	0.99	0.6504	-0.3396	Germline	3.39605e-12	rs10420353	COSM3749499
	1393	WES_Data2	THAP8	19	36530343	36530343	C	T	nonsynonymous SNV	p.R142Q	c.G425A	T	Y	1	0.6378	-0.3622	Germline	1.49261e-14	rs10421966	COSM3749500
	1394	WES_Data2	WDR62	19	36590329	36590329	T	C	nonsynonymous SNV	p.L850S	c.T2549C	C	Y	0.9848	0.6893	-0.2955	Germline	2.24452e-07	rs2285745	COSM4131728
	1395	WES_Data2	WDR62	19	36594659	36594659	A	T	nonsynonymous SNV	p.Q1310L	c.A3929T	T	W	1	0.6965	-0.3035	Germline	1.51159e-31	rs2074435	COSM3756682
	1396	WES_Data2	WDR62	19	36595436	36595436	A	C	nonsynonymous SNV	p.L1390F	c.A4170C	C	M	0.989	0.6752	-0.3138	Germline	8.00802e-28	rs1008328	COSM1129883
	1397	WES_Data2	ZNF529	19	37039069	37039069	A	C	nonsynonymous SNV	p.L113V	c.T337G	A	M	0	0.4286	0.4286	Somatic	2.42087e-08	rs2912444	COSM4000688
	1398	WES_Data2	ZNF382	19	37117302	37117302	A	G	nonsynonymous SNV	p.E167G	c.A500G	G	R	1	0.6462	-0.3538	Germline	2.45058e-08	rs3108171	COSM3756691
	1399	WES_Data2	ZNF790	19	37310344	37310344	T	C	nonsynonymous SNV	p.Q301R	c.A902G	T	Y	0	0.3333	0.3333	Somatic	0.0008298	rs3745775	COSM3756697
	1400	WES_Data2	ZNF568	19	37441980	37441980	A	G	nonsynonymous SNV	p.Q578R	c.A1733G	G	R	1	0.6053	-0.3947	Germline	1.37725e-09	rs1644634	COSM5427179
	1401	WES_Data2	ZNF793	19	38024271	38024271	T	G	nonsynonymous SNV	p.I68M	c.T204G	T	K	0.006	0.3317	0.3257	Somatic	1.8953e-19	rs12977460
	1402	WES_Data2	ZNF573	19	38229926	38229926	G	A	nonsynonymous SNV	p.R401W	c.C1201T	A	R	1	0.66	-0.34	Germline	1.60601e-05	rs11666245
	1403	WES_Data2	ZNF573	19	38230720	38230720	C	G	nonsynonymous SNV	p.G136A	c.G407C	C	S	0	0.4247	0.4247	Somatic	1.83756e-09	rs3752365
	1404	WES_Data2	WDR87	19	38376485	38376485	T	A	nonsynonymous SNV	p.H2609L	c.A7826T	A	W	0.9969	0.7077	-0.2892	Germline	9.41025e-32	rs10408510	COSM4131764
	1405	WES_Data2	WDR87	19	38378539	38378539	G	C	nonsynonymous SNV	p.N1924K	c.C5772G	C	S	1	0.6923	-0.3077	Germline	0.000537048	rs10422056	COSM4590944
	1406	WES_Data2	WDR87	19	38384421	38384421	C	G	nonsynonymous SNV	p.G641A	c.G1922C	G	S	0.9964	0.6759	-0.3205	Germline	1.67622e-30	rs3894129
	1407	WES_Data2	CAPN12	19	39221822	39221822	G	A	nonsynonymous SNV	p.R667C	c.C1999T	A	R	0.9901	0.6226	-0.3675	Germline	6.88107e-13	rs143345899	COSM4581006
	1408	WES_Data2	ECH1	19	39322087	39322087	T	G	nonsynonymous SNV	p.E41A	c.A122C	T	K	0.0026	0.3639	0.3613	Somatic	1.30871e-47	rs9419	COSM4131790
	1409	WES_Data2	RINL	19	39360597	39360597	C	T	nonsynonymous SNV	p.R443Q	c.G1328A	T	Y	0.9901	0.5941	-0.396	Germline	2.44744e-30	rs113728915	COSM3756767
	1410	WES_Data2	RINL	19	39360720	39360720	G	A	nonsynonymous SNV	p.P402L	c.C1205T	A	R	1	0.5673	-0.4327	Germline	1.48172e-19	rs8110393	COSM3746489
	1411	WES_Data2	RINL	19	39367111	39367111	T	C	nonsynonymous SNV	p.N24D	c.A70G	C	Y	0.9947	0.6765	-0.3182	Germline	2.50711e-21	rs1001413	COSM4592202
	1412	WES_Data2	IFNL2	19	39760191	39760191	A	G	nonsynonymous SNV	p.T112A	c.A334G	A	R	0	0.2977	0.2977	Somatic	4.02244e-14	rs8103362	COSM5749923
	1413	WES_Data2	IFNL2	19	39760435	39760435	T	C	nonsynonymous SNV	p.Y160H	c.T478C	T	Y	0	0.2194	0.2194	Somatic	1.55907e-12	rs59746524	COSM4592994
	1414	WES_Data2	PLEKHG2	19	39908657	39908657	G	T	nonsynonymous SNV	p.G273V	c.G818T	T	K	1	0.6944	-0.3056	Germline	6.45207e-06	rs117405645
	1415	WES_Data2	PLEKHG2	19	39911451	39911451	C	G	nonsynonymous SNV	p.P394R	c.C1181G	G	S	1	0.5962	-0.4038	Germline	1.04481e-28	rs34975345
	1416	WES_Data2	PLEKHG2	19	39914748	39914748	G	A	nonsynonymous SNV	p.R933K	c.G2798A	G	R	0.0064	0.3171	0.3107	Somatic	1.69998e-32	rs31726	COSM3756778
	1417	WES_Data2	PLEKHG2	19	39915758	39915758	C	G	nonsynonymous SNV	p.P1329A	c.C3985G	C	S	0.0144	0.3795	0.3651	Somatic	1.93249e-17	rs31728	COSM3756780
	1418	WES_Data2	DLL3	19	39993560	39993560	T	G	nonsynonymous SNV	p.F172C	c.T515G	T	K	0	0.3448	0.3448	Somatic	0.00386824	rs8107127
	1419	WES_Data2	DLL3	19	39994711	39994711	T	C	nonsynonymous SNV	p.L218P	c.T653C	T	Y	0	0.3077	0.3077	Somatic	1.38746e-06	rs1110627	COSM3756786
	1420	WES_Data2	HIPK4	19	40886993	40886993	C	T	nonsynonymous SNV	p.R302Q	c.G905A	C	Y	0.0108	0.2595	0.2487	Somatic	1.8399e-21	rs11670988	COSM3766347
	1421	WES_Data2	SERTAD1	19	40929363	40929363	T	C	nonsynonymous SNV	p.T31A	c.A91G	C	Y	1	0.6771	-0.3229	Germline	4.18475e-22	rs268687	COSM4978205
	1422	WES_Data2	SPTBN4	19	40978640	40978640	G	A	nonsynonymous SNV	p.A38T	c.G112A	G	R	0.0133	0.402	0.3887	Somatic	4.67158e-11	rs73931308	COSM4610396
	1423	WES_Data2	SPTBN4	19	41038574	41038574	G	A	nonsynonymous SNV	p.G7S	c.G19A	G	R	0	0.3557	0.3557	Somatic	4.17985e-21	rs814501
	1424	WES_Data2	COQ8B	19	41211056	41211056	T	C	nonsynonymous SNV	p.H133R	c.A398G	C	Y	0.9954	0.6899	-0.3055	Germline	2.42578e-23	rs3865452	COSM148632
	1425	WES_Data2	C19orf54	19	41255500	41255500	C	G	nonsynonymous SNV	p.R70P	c.G209C	G	S	1	0.6381	-0.3619	Germline	2.01323e-13	rs2254343	COSM3823143
	1426	WES_Data2	EGLN2	19	41306844	41306844	G	A	nonsynonymous SNV	p.E123K	c.G367A	A	R	1	0.6757	-0.3243	Germline	5.63057e-16	rs368154991
	1427	WES_Data2	CYP2A7	19	41381647	41381647	A	C	nonsynonymous SNV	p.V428G	c.T1283G	C	M	1	0.5752	-0.4248	Germline	1.61485e-60	rs12460590	COSM4131879
	1428	WES_Data2	CYP2A7	19	41383115	41383115	G	A	nonsynonymous SNV	p.R330W	c.C988T	A	R	0.9948	0.6406	-0.3542	Germline	5.20837e-24	rs111390860
	1429	WES_Data2	CYP2A7	19	41383799	41383799	G	A	nonsynonymous SNV	p.R260C	c.C778T	A	R	0.9974	0.6321	-0.3653	Germline	3.71393e-51	rs3869579	COSM3756808
	1430	WES_Data2	CYP2A7	19	41384675	41384675	T	C	nonsynonymous SNV	p.H223R	c.A668G	C	Y	1	0.6762	-0.3238	Germline	4.36418e-23	rs4079366
	1431	WES_Data2	CYP2A7	19	41386136	41386136	A	C	nonsynonymous SNV	p.D118E	c.T354G	C	M	0.9944	0.7047	-0.2897	Germline	7.55166e-19	rs4142867	COSM3927736
	1432	WES_Data2	CYP2A7	19	41386420	41386420	A	C	nonsynonymous SNV	p.S102A	c.T304G	C	M	1	0.642	-0.358	Germline	2.5339e-17	rs56081734	COSM3927737
	1433	WES_Data2	CYP2A7	19	41386494	41386494	A	C	nonsynonymous SNV	p.L77R	c.T230G	C	M	1	0.6339	-0.3661	Germline	1.90246e-11	rs3815710	COSM1393917
	1434	WES_Data2	CYP2A7	19	41386527	41386527	G	A	nonsynonymous SNV	p.A66V	c.C197T	A	R	1	0.68	-0.32	Germline	1.52685e-06	rs58798281	COSM1393918
	1435	WES_Data2	CYP2A7	19	41387647	41387647	A	G	nonsynonymous SNV	p.C64R	c.T190C	G	R	0.994	0.5767	-0.4173	Germline	6.90453e-50	rs10425169	COSM4591719
	1436	WES_Data2	CYP2A7	19	41387656	41387656	A	T	nonsynonymous SNV	p.F61I	c.T181A	T	W	0.9941	0.5804	-0.4137	Germline	2.59634e-49	rs10425176	COSM148635
	1437	WES_Data2	CYP2F1	19	41633980	41633980	C	T	nonsynonymous SNV	p.P490L	c.C1469T	T	Y	1	0.6579	-0.3421	Germline	1.44251e-05	rs7246981
	1438	WES_Data2	HNRNPUL1	19	41808797	41808797	C	T	nonsynonymous SNV	p.R550C	c.C1648T	T	Y	1	0.6835	-0.3165	Germline	1.24994e-07	rs762181626
	1439	WES_Data2	TGFB1	19	41858876	41858876	C	G	nonsynonymous SNV	p.R25P	c.G74C	C	S	0.0068	0.3297	0.3229	Somatic	5.35765e-17	rs1800471
	1440	WES_Data2	TGFB1	19	41858921	41858921	G	A	nonsynonymous SNV	p.P10L	c.C29T	A	R	1	0.664	-0.336	Germline	3.73597e-13	rs1800470	COSM3749514
	1441	WES_Data2	EXOSC5	19	41903220	41903220	G	A	nonsynonymous SNV	p.T5M	c.C14T	A	R	1	0.68	-0.32	Germline	2.08468e-20	rs10853751	COSM5905091
	1442	WES_Data2	B3GNT8	19	41932275	41932275	T	C	nonsynonymous SNV	p.S137G	c.A409G	C	Y	0.9914	0.6297	-0.3617	Germline	2.50855e-30	rs284662
	1443	WES_Data2	ATP5SL	19	41938222	41938222	C	T	nonsynonymous SNV	p.E203K	c.G607A	T	Y	1	0.678	-0.322	Germline	6.48663e-16	rs2231943
	1444	WES_Data2	ATP5SL	19	41939297	41939297	C	G	nonsynonymous SNV	p.C132S	c.G395C	C	S	0.0088	0.3	0.2912	Somatic	1.44798e-11	rs1043413	COSM4000747
	1445	WES_Data2	ATP5SL	19	41944237	41944237	T	C	nonsynonymous SNV	p.N40S	c.A119G	T	Y	0	0.3902	0.3902	Somatic	2.10436e-18	rs2231940	COSM148638
	1446	WES_Data2	LYPD4	19	42341407	42341407	G	C	nonsynonymous SNV	p.T149S	c.C446G	C	S	0.9884	0.6752	-0.3132	Germline	7.704e-10	rs35476281	COSM5654379
	1447	WES_Data2	PSG1	19	43382368	43382368	T	G	nonsynonymous SNV	p.T43P	c.A127C	G	K	0.9954	0.6937	-0.3017	Germline	6.15256e-22	rs707745	COSM3756884
	1448	WES_Data2	PSG1	19	43382374	43382374	C	G	nonsynonymous SNV	p.E41Q	c.G121C	G	S	1	0.6991	-0.3009	Germline	5.63429e-23	rs707744	COSM3756887
	1449	WES_Data2	PSG6	19	43420451	43420451	G	C	nonsynonymous SNV	p.H85D	c.C253G	C	S	1	0.6638	-0.3362	Germline	3.3233e-26	rs3198831	COSM3756896
	1450	WES_Data2	PSG11	19	43529026	43529026	C	T	nonsynonymous SNV	p.V83I	c.G247A	C	Y	0.0048	0.3026	0.2978	Somatic	4.3833e-20	rs2471952
	1451	WES_Data2	PSG2	19	43575905	43575905	C	T	nonsynonymous SNV	p.R304H	c.G911A	T	Y	0.9941	0.545	-0.4491	Germline	1.09013e-28	rs77035666	COSM328447
	1452	WES_Data2	PSG2	19	43579679	43579679	T	A	nonsynonymous SNV	p.Q179L	c.A536T	A	W	0.9938	0.6647	-0.3291	Germline	3.31086e-35	rs1058086	COSM5009619
	1453	WES_Data2	PSG2	19	43585111	43585111	C	G	nonsynonymous SNV	p.G118R	c.G352C	G	S	1	0.6853	-0.3147	Germline	2.65862e-25	rs149579909	COSM328449
	1454	WES_Data2	PSG2	19	43586664	43586664	C	G	nonsynonymous SNV	p.V20L	c.G58C	G	S	1	0.6838	-0.3162	Germline	7.45537e-12	rs3887660	COSM148654
	1455	WES_Data2	PSG5	19	43680037	43680037	T	A	nonsynonymous SNV	p.T232S	c.A694T	T	W	0.0138	0.2575	0.2437	Somatic	3.49416e-11	rs1135901	COSM1394257
	1456	WES_Data2	PSG5	19	43680051	43680051	C	T	nonsynonymous SNV	p.R227H	c.G680A	C	Y	0.013	0.2743	0.2613	Somatic	7.8003e-13	rs1058285
	1457	WES_Data2	PSG5	19	43680269	43680269	G	C	nonsynonymous SNV	p.N154K	c.C462G	G	S	0.0066	0.3128	0.3062	Somatic	3.17288e-16	rs1058259	COSM3756898
	1458	WES_Data2	PSG5	19	43690506	43690506	G	C	nonsynonymous SNV	p.L18V	c.C52G	G	S	0.0217	0.3058	0.2841	Somatic	1.01352e-08	rs8107936	COSM1564387
	1459	WES_Data2	PSG4	19	43699336	43699336	T	C	nonsynonymous SNV	p.K174E	c.A520G	T	Y	0	0.2645	0.2645	Somatic	8.3076e-17	rs1058718
	1460	WES_Data2	PSG4	19	43708245	43708245	G	C	nonsynonymous SNV	p.L75V	c.C223G	G	S	0	0.2944	0.2944	Somatic	1.0179e-19	rs3170216	COSM3756901
	1461	WES_Data2	PSG4	19	43709637	43709637	C	G	nonsynonymous SNV	p.V18L	c.G52C	G	S	1	0.5612	-0.4388	Germline	1.41255e-14	rs141508635	COSM328450
	1462	WES_Data2	XRCC1	19	44057574	44057574	G	A	nonsynonymous SNV	p.R194W	c.C580T	G	R	0.0125	0.2798	0.2673	Somatic	2.21932e-13	rs1799782	COSM3756908
	1463	WES_Data2	PINLYP	19	44081288	44081288	A	G	nonsynonymous SNV	p.H6R	c.A17G	A	R	0	0.2922	0.2922	Somatic	2.85939e-14	rs2682585
	1464	WES_Data2	SRRM5	19	44116956	44116956	A	G	nonsynonymous SNV	p.K228R	c.A683G	G	R	0.9945	0.6681	-0.3264	Germline	2.5996e-21	rs13343696	COSM3756910
	1465	WES_Data2	SRRM5	19	44118191	44118191	G	A	nonsynonymous SNV	p.D640N	c.G1918A	A	R	1	0.6466	-0.3534	Germline	1.34947e-32	rs34163641	COSM3756911
	1466	WES_Data2	PLAUR	19	44156472	44156472	T	C	nonsynonymous SNV	p.K175R	c.A524G	C	Y	1	0.6744	-0.3256	Germline	3.81685e-26	rs2302524	COSM148659
	1467	WES_Data2	LYPD5	19	44302624	44302624	T	C	nonsynonymous SNV	p.N124S	c.A371G	C	Y	1	0.5839	-0.4161	Germline	1.2526e-15	rs349053	COSM1394320
	1468	WES_Data2	LYPD5	19	44303066	44303066	C	G	nonsynonymous SNV	p.A47P	c.G139C	G	S	1	0.6092	-0.3908	Germline	2.48077e-11	rs11547806	COSM1129805
	1469	WES_Data2	ZNF221	19	44470475	44470475	A	G	nonsynonymous SNV	p.K274R	c.A821G	G	R	1	0.6095	-0.3905	Germline	1.45857e-15	rs144749364
	1470	WES_Data2	ZNF223	19	44570393	44570393	C	A	nonsynonymous SNV	p.L138I	c.C412A	C	M	0.0156	0.2411	0.2255	Somatic	2.66331e-08	rs6509138
	1471	WES_Data2	ZNF223	19	44570951	44570951	G	A	nonsynonymous SNV	p.G324S	c.G970A	A	R	0.9892	0.584	-0.4052	Germline	2.41052e-14	rs61729338
	1472	WES_Data2	ZNF284	19	44591360	44591360	G	A	nonsynonymous SNV	p.E577K	c.G1729A	G	R	0	0.4	0.4	Somatic	3.88663e-10	rs8113249	COSM4154248
	1473	WES_Data2	ZNF224	19	44612231	44612231	A	G	nonsynonymous SNV	p.K640E	c.A1918G	A	R	0	0.4219	0.4219	Somatic	1.34298e-17	rs3746319
	1474	WES_Data2	ZNF225	19	44635822	44635822	G	A	nonsynonymous SNV	p.R352H	c.G1055A	A	R	1	0.6847	-0.3153	Germline	1.42046e-12	rs62623665
	1475	WES_Data2	ZNF112	19	44832875	44832875	A	G	nonsynonymous SNV	p.Y418H	c.T1252C	A	R	0.0141	0.241	0.2269	Somatic	1.48862e-05	rs2722722
	1476	WES_Data2	ZNF112	19	44832992	44832992	C	G	nonsynonymous SNV	p.E379Q	c.G1135C	C	S	0	0.2596	0.2596	Somatic	1.2612e-08	rs2722723
	1477	WES_Data2	ZNF285	19	44890801	44890801	T	C	nonsynonymous SNV	p.R381G	c.A1141G	C	Y	0.9928	0.6494	-0.3434	Germline	3.83956e-17	rs12610859	COSM3756924
	1478	WES_Data2	ZNF229	19	44932972	44932972	C	T	nonsynonymous SNV	p.G656R	c.G1966A	T	Y	0.9938	0.6374	-0.3564	Germline	1.19216e-39	rs1434579	COSM3756926
	1479	WES_Data2	ZNF229	19	44933947	44933947	G	A	nonsynonymous SNV	p.R331C	c.C991T	A	R	1	0.6223	-0.3777	Germline	2.34315e-30	rs12151338	COSM3756927
	1480	WES_Data2	ZNF180	19	44981883	44981883	C	G	nonsynonymous SNV	p.C247S	c.G740C	C	S	0.0128	0.2991	0.2863	Somatic	4.16579e-08	rs1897820	COSM3724259
	1481	WES_Data2	ZNF180	19	44983567	44983567	C	G	nonsynonymous SNV	p.W64C	c.G192C	C	S	0	0.3544	0.3544	Somatic	2.13585e-17	rs2253563	COSM4000789
	1482	WES_Data2	ZNF180	19	45001346	45001346	G	A	nonsynonymous SNV	p.A41V	c.C122T	G	R	0	0.2752	0.2752	Somatic	8.63519e-20	rs2571108	COSM1394477
	1483	WES_Data2	CEACAM20	19	45016116	45016116	A	G	nonsynonymous SNV	p.C419R	c.T1255C	G	R	1	0.6286	-0.3714	Germline	4.56881e-17	rs8100718	COSN165847
	1484	WES_Data2	CEACAM20	19	45017249	45017249	T	C	nonsynonymous SNV	p.Y377C	c.A1130G	T	Y	0.0062	0.3483	0.3421	Somatic	4.2767e-19	rs1465723
	1485	WES_Data2	BCAM	19	45322744	45322744	A	G	nonsynonymous SNV	p.T539A	c.A1615G	A	R	0	0.3319	0.3319	Somatic	1.1311e-48	rs1135062	COSM1179785
	1486	WES_Data2	APOE	19	45409167	45409167	C	G	nonsynonymous SNV	p.N14K	c.C42G	C	S	0.0312	0.2958	0.2646	Somatic	2.24951e-05	rs440446	COSN8992671
	1487	WES_Data2	APOC4	19	45448036	45448036	T	C	nonsynonymous SNV	p.L36P	c.T107C	C	Y	1	0.5506	-0.4494	Germline	2.41824e-14	rs1132899	COSM4132109
	1488	WES_Data2	CD3EAP	19	45911899	45911899	G	A	nonsynonymous SNV	p.E227K	c.G679A	A	R	0.9845	0.6524	-0.3321	Germline	1.1765e-14	rs113047593	COSM4436402
	1489	WES_Data2	CD3EAP	19	45912736	45912736	C	A	nonsynonymous SNV	p.Q506K	c.C1516A	A	M	0.9911	0.6992	-0.2919	Germline	4.08932e-11	rs3212986	COSM4985714
	1490	WES_Data2	GIPR	19	46181392	46181392	G	C	nonsynonymous SNV	p.E318Q	c.G952C	C	S	1	0.7031	-0.2969	Germline	2.11643e-07	rs1800437	COSM4132137
	1491	WES_Data2	FBXO46	19	46216642	46216642	G	T	nonsynonymous SNV	p.P38T	c.C112A	G	K	0	0.4111	0.4111	Somatic	5.32096e-12	rs11537711
	1492	WES_Data2	BHMG1	19	46262286	46262286	C	A	nonsynonymous SNV	p.T388N	c.C1163A	C	M	0.0059	0.3077	0.3018	Somatic	1.59263e-34	rs725660	COSN8992679
	1493	WES_Data2	BHMG1	19	46265222	46265222	C	T	nonsynonymous SNV	p.T487M	c.C1460T	T	Y	0.9955	0.5946	-0.4009	Germline	1.52734e-32	rs76618306
	1494	WES_Data2	SIX5	19	46268902	46268902	C	T	nonsynonymous SNV	p.V693M	c.G2077A	C	Y	0	0.2655	0.2655	Somatic	7.20897e-09	rs2341097	COSM439801
	1495	WES_Data2	SIX5	19	46269076	46269076	G	A	nonsynonymous SNV	p.P635S	c.C1903T	A	R	1	0.7226	-0.2774	Germline	3.48558e-12	rs2014576	COSM3756957
	1496	WES_Data2	CCDC61	19	46518682	46518682	G	A	nonsynonymous SNV	p.R281K	c.G842A	G	R	0	0.2	0.2	Somatic	0.00125474	rs7271	COSM3756966
	1497	WES_Data2	CCDC61	19	46520026	46520026	A	G	nonsynonymous SNV	p.Q389R	c.A1166G	A	R	0	0.2442	0.2442	Somatic	4.70663e-06	rs2287306	COSM3766379
	1498	WES_Data2	IGFL4	19	46543566	46543566	C	T	nonsynonymous SNV	p.R60Q	c.G179A	C	Y	0.0114	0.3391	0.3277	Somatic	2.12978e-18	rs17271272	COSM3756967
	1499	WES_Data2	SLC1A5	19	47278859	47278859	C	G	nonsynonymous SNV	p.V310L	c.G928C	C	S	0	0.3593	0.3593	Somatic	5.11385e-20	rs3027961
	1500	WES_Data2	AP2S1	19	47342867	47342867	A	C	nonsynonymous SNV	p.I55S	c.T164G	A	M	0.0085	0.3296	0.3211	Somatic	1.35527e-38	rs312185	COSN15305010
	1501	WES_Data2	CCDC9	19	47768128	47768128	G	C	nonsynonymous SNV	p.E215D	c.G645C	C	S	1	0.6212	-0.3788	Germline	4.17876e-09	rs2032811	COSM3749524
	1502	WES_Data2	CCDC9	19	47774772	47774772	T	C	nonsynonymous SNV	p.L478P	c.T1433C	C	Y	1	0.6863	-0.3137	Germline	2.70346e-06	rs888836	COSM3721172
	1503	WES_Data2	DHX34	19	47856336	47856336	C	T	nonsynonymous SNV	p.R17W	c.C49T	C	Y	0.0091	0.3083	0.2992	Somatic	8.79976e-22	rs12984558
	1504	WES_Data2	KPTN	19	47978716	47978716	T	C	nonsynonymous SNV	p.E367G	c.A1100G	C	Y	1	0.6281	-0.3719	Germline	4.12141e-21	rs781132082
	1505	WES_Data2	TPRX1	19	48305586	48305586	G	A	nonsynonymous SNV	p.P228S	c.C682T	A	R	0.9583	0.4091	-0.5492	Germline	5.11004e-05	rs145255760	COSM4132208
	1506	WES_Data2	TPRX1	19	48305654	48305654	C	T	nonsynonymous SNV	p.G205D	c.G614A	T	Y	0.9394	0.5484	-0.391	Germline	0.000307526	rs73036913	COSM4132209
	1507	WES_Data2	BSPH1	19	48495304	48495304	G	A	nonsynonymous SNV	p.T12M	c.C35T	A	R	1	0.6458	-0.3542	Germline	3.30439e-05	rs60213124	COSM148678
	1508	WES_Data2	ELSPBP1	19	48517538	48517538	G	A	nonsynonymous SNV	p.G61S	c.G181A	A	R	1	0.7167	-0.2833	Germline	7.20558e-06	rs62129078
	1509	WES_Data2	ELSPBP1	19	48519158	48519158	C	T	nonsynonymous SNV	p.R73C	c.C217T	T	Y	1	0.5607	-0.4393	Germline	1.86104e-21	rs34129198
	1510	WES_Data2	PLA2G4C	19	48598823	48598823	A	G	nonsynonymous SNV	p.S213P	c.T637C	A	R	0	0.2524	0.2524	Somatic	4.99441e-16	rs156631
	1511	WES_Data2	PLA2G4C	19	48602948	48602948	T	C	nonsynonymous SNV	p.I153V	c.A457G	C	Y	1	0.6697	-0.3303	Germline	8.36644e-11	rs2303744
	1512	WES_Data2	CARD8	19	48737706	48737706	A	T	nonsynonymous SNV	p.F102I	c.T304A	T	W	1	0.6396	-0.3604	Germline	2.96647e-10	rs2043211	COSM3756998
	1513	WES_Data2	CCDC114	19	48800751	48800751	C	A	nonsynonymous SNV	p.A499S	c.G1495T	A	M	1	0.7	-0.3	Germline	8.51193e-07	rs61747754
	1514	WES_Data2	IZUMO1	19	49244220	49244220	G	A	nonsynonymous SNV	p.A220V	c.C659T	A	R	1	0.6017	-0.3983	Germline	4.12981e-13	rs2307019
	1515	WES_Data2	HSD17B14	19	49339098	49339098	T	C	nonsynonymous SNV	p.N31D	c.A91G	C	Y	0.9946	0.6745	-0.3201	Germline	1.29877e-21	rs8110220	COSM5034135
	1516	WES_Data2	TULP2	19	49400634	49400634	C	T	nonsynonymous SNV	p.A18T	c.G52A	T	Y	0.9889	0.6656	-0.3233	Germline	1.59184e-28	rs7260579
	1517	WES_Data2	KCNA7	19	49573438	49573438	A	G	nonsynonymous SNV	p.M418T	c.T1253C	A	R	0	0.3108	0.3108	Somatic	4.21011e-25	rs1017219	COSM4000817
	1518	WES_Data2	KCNA7	19	49574125	49574125	G	C	nonsynonymous SNV	p.P189R	c.C566G	G	S	0	0.2921	0.2921	Somatic	1.47613e-08	rs1611775
	1519	WES_Data2	C19orf73	19	49621964	49621964	T	C	nonsynonymous SNV	p.S106G	c.A316G	T	Y	0	0.2532	0.2532	Somatic	4.29305e-13	rs2232003	COSM4000819
	1520	WES_Data2	HRC	19	49658367	49658367	C	T	nonsynonymous SNV	p.S43N	c.G128A	T	Y	0.9923	0.6994	-0.2929	Germline	1.22665e-13	rs3745298	COSM4132253
	1521	WES_Data2	DKKL1	19	49867913	49867913	G	A	nonsynonymous SNV	p.A29T	c.G85A	G	R	0	0.3151	0.3151	Somatic	7.74998e-09	rs919364	COSM5001917
	1522	WES_Data2	CCDC155	19	49899076	49899076	G	A	nonsynonymous SNV	p.R129Q	c.G386A	G	R	0.0116	0.2342	0.2226	Somatic	3.21892e-11	rs10405154	COSM5002021
	1523	WES_Data2	ALDH16A1	19	49964977	49964977	C	G	nonsynonymous SNV	p.L227V	c.C679G	C	S	0	0.2609	0.2609	Somatic	4.5438e-06	rs1320303	COSM1751066
	1524	WES_Data2	RCN3	19	50045878	50045878	C	T	nonsynonymous SNV	p.R250W	c.C748T	T	Y	1	0.7258	-0.2742	Germline	0.000111221	rs34654230	COSM439980
	1525	WES_Data2	PRRG2	19	50091798	50091798	G	T	nonsynonymous SNV	p.G116C	c.G346T	T	K	1	0.62	-0.38	Germline	6.21141e-10	rs2288920
	1526	WES_Data2	IRF3	19	50162909	50162909	C	G	nonsynonymous SNV	p.S154T	c.G461C	G	S	1	0.6786	-0.3214	Germline	1.44344e-19	rs7251	COSM148687
	1527	WES_Data2	PTOV1	19	50354211	50354211	C	T	nonsynonymous SNV	p.S25L	c.C74T	T	Y	1	0.6337	-0.3663	Germline	1.1339e-11	rs7260222	COSM4132286
	1528	WES_Data2	SIGLEC11	19	50463982	50463982	T	G	nonsynonymous SNV	p.E96A	c.A287C	G	K	0.9898	0.6694	-0.3204	Germline	1.21418e-41	rs9676436	COSM4413040
	1529	WES_Data2	SIGLEC11	19	50464171	50464171	C	G	nonsynonymous SNV	p.S33T	c.G98C	G	S	1	0.6685	-0.3315	Germline	1.29526e-18	rs62113159
	1530	WES_Data2	NAPSA	19	50865535	50865535	A	G	nonsynonymous SNV	p.I40T	c.T119C	G	R	0.9945	0.6188	-0.3757	Germline	5.54109e-25	rs676314	COSM1180595
	1531	WES_Data2	ASPDH	19	51015404	51015404	T	C	nonsynonymous SNV	p.Q161R	c.A482G	C	Y	1	0.6731	-0.3269	Germline	1.04221e-05	rs12977172	COSM3749542
	1532	WES_Data2	LRRC4B	19	51021057	51021057	A	G	nonsynonymous SNV	p.V638A	c.T1913C	G	R	1	0.6815	-0.3185	Germline	9.20602e-14	rs61751957	COSM3749543
	1533	WES_Data2	LRRC4B	19	51052056	51052056	G	A	nonsynonymous SNV	p.P14S	c.C40T	G	R	0	0.3333	0.3333	Somatic	3.14688e-07	rs370091007
	1534	WES_Data2	ACPT	19	51297825	51297825	G	A	nonsynonymous SNV	p.A325T	c.G973A	G	R	0	0.2667	0.2667	Somatic	1.12128e-28	rs55716643	COSM1737820
	1535	WES_Data2	ACPT	19	51297826	51297826	C	A	nonsynonymous SNV	p.A325D	c.C974A	C	M	0	0.2675	0.2675	Somatic	7.08857e-29	rs55735528	COSM1737821
	1536	WES_Data2	C19orf48	19	51301395	51301395	C	T	nonsynonymous SNV	p.G104E	c.G311A	C	Y	0	0.3986	0.3986	Somatic	6.64136e-19	rs4801853	COSM4985279
	1537	WES_Data2	C19orf48	19	51301456	51301456	G	A	nonsynonymous SNV	p.R84C	c.C250T	G	R	0	0.3796	0.3796	Somatic	1.66238e-25	rs4802741	COSM4985280
	1538	WES_Data2	KLK1	19	51323473	51323473	C	G	nonsynonymous SNV	p.E145Q	c.G433C	C	S	0.0033	0.3364	0.3331	Somatic	1.8983e-34	rs5516	COSM4132329
	1539	WES_Data2	KLK14	19	51584916	51584916	G	A	nonsynonymous SNV	p.H45Y	c.C133T	G	R	0.0152	0.2676	0.2524	Somatic	1.14568e-05	rs2569491	COSM3757090
	1540	WES_Data2	KLK14	19	51584951	51584951	T	C	nonsynonymous SNV	p.Q33R	c.A98G	T	Y	0.0141	0.2597	0.2456	Somatic	6.53548e-06	rs35287116
	1541	WES_Data2	CTU1	19	51607507	51607507	G	A	nonsynonymous SNV	p.A107V	c.C320T	G	R	0	0.3582	0.3582	Somatic	2.28807e-13	rs17855403	COSM4597365
	1542	WES_Data2	CD33	19	51728477	51728477	C	T	nonsynonymous SNV	p.A14V	c.C41T	C	Y	0.0067	0.3434	0.3367	Somatic	1.84867e-17	rs12459419	COSM5828919
	1543	WES_Data2	CD33	19	51738917	51738917	G	A	nonsynonymous SNV	p.G177R	c.G529A	G	R	0.006	0.347	0.341	Somatic	8.15001e-21	rs35112940
	1544	WES_Data2	SIGLEC10	19	51919998	51919998	T	C	nonsynonymous SNV	p.N152D	c.A454G	T	Y	0.0084	0.342	0.3336	Somatic	9.42338e-27	rs61741677	COSM3773904
	1545	WES_Data2	SIGLEC10	19	51920011	51920011	T	G	nonsynonymous SNV	p.R147S	c.A441C	T	K	0.0082	0.343	0.3348	Somatic	1.10056e-27	rs148042318	COSM228721
	1546	WES_Data2	CEACAM18	19	51983673	51983673	G	A	nonsynonymous SNV	p.V47M	c.G139A	A	R	0.9973	0.6468	-0.3505	Germline	7.9402e-47	rs61743859	COSM3757102
	1547	WES_Data2	CEACAM18	19	51984656	51984656	G	A	nonsynonymous SNV	p.S137N	c.G410A	A	R	0.9845	0.663	-0.3215	Germline	1.52173e-14	rs62115071	COSM3757104
	1548	WES_Data2	CEACAM18	19	51986547	51986547	A	G	nonsynonymous SNV	p.H317R	c.A950G	G	R	0.9894	0.6389	-0.3505	Germline	2.23302e-22	rs10426247	COSM1395679
	1549	WES_Data2	SIGLEC12	19	51995046	51995046	G	T	nonsynonymous SNV	p.P428Q	c.C1283A	T	T	1	0.7812	-0.2188	Germline	0.0127308	rs57043266
	1550	WES_Data2	SIGLEC12	19	52000672	52000672	G	A	nonsynonymous SNV	p.T360M	c.C1079T	G	R	0.0083	0.4085	0.4002	Somatic	1.13082e-17	rs3829658	COSM148702
	1551	WES_Data2	SIGLEC12	19	52001485	52001485	G	A	nonsynonymous SNV	p.H280Y	c.C838T	G	R	0	0.3509	0.3509	Somatic	2.41118e-36	rs11668530	COSM3757107
	1552	WES_Data2	SIGLEC12	19	52004743	52004743	G	A	nonsynonymous SNV	p.A82V	c.C245T	G	R	0.0051	0.2869	0.2818	Somatic	1.50934e-19	rs3810110	COSM148704
	1553	WES_Data2	SIGLEC12	19	52004878	52004878	C	T	nonsynonymous SNV	p.G37D	c.G110A	C	Y	0	0.2996	0.2996	Somatic	3.82884e-22	rs148809065
	1554	WES_Data2	SIGLEC12	19	52004903	52004903	G	A	stopgain	p.Q29X	c.C85T	A	R	1	0.7115	-0.2885	Germline	2.36576e-19	rs16982743	COSM4000848
	1555	WES_Data2	HAS1	19	52223121	52223121	A	G	nonsynonymous SNV	p.C13R	c.T37C	A	R	0	0.2821	0.2821	Somatic	1.10718e-06	rs7248778	COSM440132
	1556	WES_Data2	FPR1	19	52249672	52249672	A	C	nonsynonymous SNV	p.N192K	c.T576G	C	M	0.9978	0.638	-0.3598	Germline	3.52028e-58	rs1042229	COSM4000855
	1557	WES_Data2	FPR1	19	52249947	52249947	C	G	nonsynonymous SNV	p.V101L	c.G301C	C	S	0	0.3342	0.3342	Somatic	1.13816e-41	rs2070745	COSM148708
	1558	WES_Data2	ZNF577	19	52376507	52376507	T	C	nonsynonymous SNV	p.K187E	c.A559G	C	Y	0.9924	0.6389	-0.3535	Germline	2.83458e-16	rs2288868
	1559	WES_Data2	ZNF649	19	52393885	52393885	T	C	nonsynonymous SNV	p.I502V	c.A1504G	C	C	1	0.7778	-0.2222	Germline	0.000481172	rs375422235
	1560	WES_Data2	ZNF350	19	52468292	52468292	A	G	nonsynonymous SNV	p.S472P	c.T1414C	G	R	0.9919	0.6618	-0.3301	Germline	3.83677e-14	rs4986771
	1561	WES_Data2	ZNF615	19	52496149	52496149	C	T	nonsynonymous SNV	p.R732K	c.G2195A	T	Y	1	0.6917	-0.3083	Germline	2.03853e-12	rs16983353	COSM148710
	1562	WES_Data2	ZNF615	19	52497250	52497250	G	A	nonsynonymous SNV	p.T365I	c.C1094T	A	R	1	0.6333	-0.3667	Germline	1.55844e-09	rs1978717	COSM148712
	1563	WES_Data2	ZNF615	19	52497943	52497943	G	A	nonsynonymous SNV	p.T134M	c.C401T	A	R	1	0.6912	-0.3088	Germline	8.08138e-06	rs10500311	COSM148713
	1564	WES_Data2	ZNF616	19	52619065	52619065	T	C	nonsynonymous SNV	p.H451R	c.A1352G	T	Y	0	0.2222	0.2222	Somatic	2.38506e-06	rs3764537	COSM4000858
	1565	WES_Data2	ZNF836	19	52660279	52660279	C	T	nonsynonymous SNV	p.M219I	c.G657A	C	Y	0	0.32	0.32	Somatic	1.34422e-08	rs1366245	COSM3757129
	1566	WES_Data2	ZNF610	19	52869022	52869022	G	T	nonsynonymous SNV	p.A88S	c.G262T	T	K	1	0.5	-0.5	Germline	2.01682e-05	rs2241586	COSM4000865
	1567	WES_Data2	ZNF610	19	52869278	52869278	G	C	nonsynonymous SNV	p.R173P	c.G518C	C	S	1	0.6122	-0.3878	Germline	3.3573e-07	rs321937	COSM4416763
	1568	WES_Data2	ZNF880	19	52876385	52876385	G	A	nonsynonymous SNV	p.V12M	c.G34A	A	R	1	0.6133	-0.3867	Germline	2.44643e-09	rs14048	COSM3757132
	1569	WES_Data2	ZNF880	19	52887282	52887282	A	G	nonsynonymous SNV	p.Y150C	c.A449G	G	G	1	0.8438	-0.1562	Germline	0.0402238	rs324125	COSM3757133
	1570	WES_Data2	ZNF880	19	52887427	52887427	A	C	nonsynonymous SNV	p.R198S	c.A594C	A	M	0	0.3667	0.3667	Somatic	0.000296068	rs8104808	COSM4132361
	1571	WES_Data2	ZNF880	19	52887437	52887437	A	C	nonsynonymous SNV	p.N202H	c.A604C	A	M	0	0.4138	0.4138	Somatic	7.33734e-05	rs8104812	COSM4132362
	1572	WES_Data2	ZNF880	19	52888245	52888245	A	G	nonsynonymous SNV	p.K471R	c.A1412G	A	R	0.0213	0.2182	0.1969	Somatic	0.00235983	rs55748277	COSM4132376
	1573	WES_Data2	ZNF611	19	53209553	53209553	G	A	nonsynonymous SNV	p.P252L	c.C755T	A	R	1	0.7333	-0.2667	Germline	7.92664e-05	rs4085566	COSM148721
	1574	WES_Data2	ZNF611	19	53209554	53209554	G	T	nonsynonymous SNV	p.P252T	c.C754A	T	K	1	0.7333	-0.2667	Germline	0.000105003	rs4085565	COSM3757148
	1575	WES_Data2	ZNF28	19	53303705	53303705	T	G	nonsynonymous SNV	p.K465Q	c.A1393C	G	G	1	0.75	-0.25	Germline	0.000583572	rs10417163
	1576	WES_Data2	ZNF468	19	53344051	53344051	T	C	nonsynonymous SNV	p.E499G	c.A1496G	C	Y	0.987	0.6952	-0.2918	Germline	3.63959e-08	rs112227284
	1577	WES_Data2	ZNF468	19	53344426	53344426	T	C	nonsynonymous SNV	p.H374R	c.A1121G	C	Y	1	0.6	-0.4	Germline	2.3561e-07	rs12462929	COSM3738294
	1578	WES_Data2	ZNF468	19	53344919	53344919	T	G	nonsynonymous SNV	p.M210L	c.A628C	T	K	0	0.3226	0.3226	Somatic	8.27139e-05	rs58239286	COSM4000888
	1579	WES_Data2	ZNF468	19	53345060	53345060	G	C	nonsynonymous SNV	p.Q163E	c.C487G	C	S	1	0.6061	-0.3939	Germline	1.48294e-05	rs61747364	COSM3757149
	1580	WES_Data2	ZNF468	19	53345095	53345095	G	A	nonsynonymous SNV	p.P151L	c.C452T	A	R	1	0.5574	-0.4426	Germline	2.4236e-08	rs61729939	COSM3757151
	1581	WES_Data2	ZNF468	19	53345110	53345110	A	G	nonsynonymous SNV	p.L146S	c.T437C	G	R	1	0.5692	-0.4308	Germline	4.31792e-09	rs61729942	COSM3757152
	1582	WES_Data2	ZNF468	19	53345176	53345176	C	T	nonsynonymous SNV	p.G124D	c.G371A	T	Y	1	0.5612	-0.4388	Germline	2.4342e-14	rs61732713	COSM3757153
	1583	WES_Data2	ZNF468	19	53348505	53348505	G	A	nonsynonymous SNV	p.R63C	c.C187T	G	R	0	0.3571	0.3571	Somatic	0.0376812	rs62117473
	1584	WES_Data2	ZNF468	19	53348534	53348534	A	G	nonsynonymous SNV	p.I53T	c.T158C	G	R	1	0.6429	-0.3571	Germline	0.0376812	rs73069429
	1585	WES_Data2	ZNF816	19	53454789	53454789	A	T	nonsynonymous SNV	p.I80N	c.T239A	A	W	0	0.3226	0.3226	Somatic	0.000130435	rs12459008	COSM3757158
	1586	WES_Data2	ERVV-2	19	53554075	53554075	A	G	nonsynonymous SNV	p.Q524R	c.A1571G	G	R	1	0.621	-0.379	Germline	8.21081e-16	rs1650983
	1587	WES_Data2	ZNF415	19	53612055	53612055	T	C	nonsynonymous SNV	p.N185D	c.A553G	T	Y	0	0.3699	0.3699	Somatic	2.46269e-18	rs10410030
	1588	WES_Data2	ZNF415	19	53612745	53612745	T	C	nonsynonymous SNV	p.I185V	c.A553G	C	Y	1	0.5514	-0.4486	Germline	1.82935e-11	rs1133327	COSM5427126
	1589	WES_Data2	ZNF415	19	53612757	53612757	T	G	nonsynonymous SNV	p.I181L	c.A541C	G	K	1	0.5545	-0.4455	Germline	1.14436e-11	rs1054485	COSM5427128
	1590	WES_Data2	ZNF347	19	53645291	53645291	T	C	nonsynonymous SNV	p.N265D	c.A793G	T	Y	0	0.3485	0.3485	Somatic	5.49411e-09	rs2195310	COSM3757161
	1591	WES_Data2	ZNF665	19	53667804	53667804	C	T	nonsynonymous SNV	p.V647I	c.G1939A	C	Y	0	0.3333	0.3333	Somatic	1.0044e-08	rs4801958	COSM5445658
	1592	WES_Data2	ZNF665	19	53669492	53669492	A	G	nonsynonymous SNV	p.V84A	c.T251C	A	R	0.0208	0.2471	0.2263	Somatic	2.77537e-06	rs12460170	COSM5445671
	1593	WES_Data2	VN1R2	19	53761740	53761740	T	C	nonsynonymous SNV	p.C38R	c.T112C	T	Y	0	0.6	0.6	Somatic	1.42175e-05	rs2965249	COSM4592894
	1594	WES_Data2	VN1R4	19	53770261	53770261	T	C	nonsynonymous SNV	p.N220D	c.A658G	T	Y	0.0088	0.2256	0.2168	Somatic	2.96338e-08	rs12977715	COSM4132412
	1595	WES_Data2	ZNF845	19	53856349	53856349	A	T	nonsynonymous SNV	p.E807D	c.A2421T	T	W	1	0.7143	-0.2857	Germline	0.000423295	rs55874600	COSM3757168
	1596	WES_Data2	ZNF525	19	53884412	53884412	G	A	nonsynonymous SNV	p.D194N	c.G580A	G	R	0	0.3636	0.3636	Somatic	3.51804e-06	rs4438413	COSM4000900
	1597	WES_Data2	ZNF813	19	53994061	53994061	A	G	nonsynonymous SNV	p.Y192C	c.A575G	G	R	1	0.5312	-0.4688	Germline	2.22102e-12	rs3859494
	1598	WES_Data2	ZNF813	19	53994802	53994802	A	T	nonsynonymous SNV	p.Y439F	c.A1316T	T	W	0.9841	0.7108	-0.2733	Germline	3.2024e-06	rs10422163	COSM148733
	1599	WES_Data2	NLRP12	19	54310851	54310851	T	C	nonsynonymous SNV	p.N715S	c.A2144G	C	Y	0.9967	0.642	-0.3547	Germline	1.42858e-37	rs150848917
	1600	WES_Data2	TMC4	19	54664209	54664209	G	C	nonsynonymous SNV	p.Q689E	c.C2065G	G	S	0.0036	0.3467	0.3431	Somatic	2.5299e-34	rs36657	COSM1163606
	1601	WES_Data2	TMC4	19	54675643	54675643	G	A	nonsynonymous SNV	p.H103Y	c.C307T	G	R	0	0.4032	0.4032	Somatic	4.0555e-08	rs77215230	COSM3773906
	1602	WES_Data2	TMC4	19	54676763	54676763	C	T	nonsynonymous SNV	p.G17E	c.G50A	C	Y	0.0104	0.2562	0.2458	Somatic	3.26604e-08	rs641738
	1603	WES_Data2	LILRB3	19	54723750	54723750	C	G	nonsynonymous SNV	p.G450R	c.G1348C	C	S	0	0.2958	0.2958	Somatic	1.83859e-06	rs11673281	COSM4597994
	1604	WES_Data2	LILRA6;LILRB3	19	54743824	54743824	T	G	nonsynonymous SNV	p.H421P	c.A1262C	T	K	0	0.3529	0.3529	Somatic	0.000166967	rs199826565
	1605	WES_Data2	LILRA6;LILRB3	19	54744195	54744195	G	A	nonsynonymous SNV	p.H405Y	c.C1213T	G	R	0.0025	0.3466	0.3441	Somatic	5.30373e-49	rs1132604	COSM4132468
	1606	WES_Data2	LILRA6;LILRB3	19	54744387	54744387	C	T	nonsynonymous SNV	p.V341M	c.G1021A	T	T	0.9793	0.7605	-0.2188	Germline	1.08108e-16	rs71263238	COSM3757190
	1607	WES_Data2	LILRA6;LILRB3	19	54744794	54744794	G	A	nonsynonymous SNV	p.H290Y	c.C868T	R	R	0.5259	0.3355	-0.1904	Germline	0.000836625	rs434127	COSM3734048
	1608	WES_Data2	LILRA6;LILRB3	19	54746380	54746380	C	T	nonsynonymous SNV	p.V21M	c.G61A	T	Y	0.9872	0.4667	-0.5205	Germline	9.01698e-16	rs150628522	COSM440263
	1609	WES_Data2	LILRB5	19	54756246	54756246	A	G	nonsynonymous SNV	p.I420T	c.T1259C	A	R	0	0.3836	0.3836	Somatic	4.36822e-09	rs117421142
	1610	WES_Data2	LILRA3	19	54804167	54804167	G	A	nonsynonymous SNV	p.P3S	c.C7T	G	R	0.0093	0.3318	0.3225	Somatic	1.63907e-22	rs11574606
	1611	WES_Data2	LILRA4	19	54849942	54849942	G	A	nonsynonymous SNV	p.P27L	c.C80T	G	R	0	0.2568	0.2568	Somatic	1.24637e-17	rs2241384
	1612	WES_Data2	LAIR1	19	54871664	54871664	G	C	nonsynonymous SNV	p.P109R	c.C326G	C	S	0.9928	0.6358	-0.357	Germline	6.46222e-18	rs74463408	COSM3757194
	1613	WES_Data2	LENG9	19	54974318	54974318	T	C	nonsynonymous SNV	p.H131R	c.A392G	T	Y	0	0.2566	0.2566	Somatic	3.11748e-10	rs10406453	COSM1751149
	1614	WES_Data2	LENG9	19	54974538	54974538	C	T	nonsynonymous SNV	p.G58R	c.G172A	C	Y	0	0.3585	0.3585	Somatic	3.96065e-07	rs202206879
	1615	WES_Data2	LENG9	19	54974774	54974774	A	T	startloss	p.G2_M23del	c.T2A	A	W	0	0.35	0.35	Somatic	0.01441	rs1981829	COSM3749550
	1616	WES_Data2	LILRB4	19	55176262	55176262	A	G	nonsynonymous SNV	p.D252G	c.A755G	A	R	0	0.3276	0.3276	Somatic	6.90658e-20	rs731170	COSM4132514
	1617	WES_Data2	LILRB4	19	55178162	55178162	A	G	nonsynonymous SNV	p.N365D	c.A1093G	G	R	1	0.726	-0.274	Germline	2.23679e-30	rs11574576	COSM5905096
	1618	WES_Data2	KIR2DL1	19	55281315	55281315	G	T	nonsynonymous SNV	p.V5F	c.G13T	T	K	0.992	0.6475	-0.3445	Germline	4.12131e-29	rs2304224	COSM440292
	1619	WES_Data2	KIR2DL1	19	55284824	55284824	G	C	nonsynonymous SNV	p.R37P	c.G110C	C	S	1	0.64	-0.36	Germline	2.62628e-13	rs35509911	COSM4132532
	1620	WES_Data2	KIR2DL1	19	55285072	55285072	A	G	nonsynonymous SNV	p.I120V	c.A358G	A	R	0	0.2483	0.2483	Somatic	4.19017e-25	rs138345877
	1621	WES_Data2	KIR3DL2	19	55378008	55378008	C	T	nonsynonymous SNV	p.T380M	c.C1139T	T	Y	0.9876	0.6667	-0.3209	Germline	1.75346e-23	rs3745902	COSM5001980
	1622	WES_Data2	NLRP7	19	55450655	55450655	T	C	nonsynonymous SNV	p.K511R	c.A1532G	T	Y	0	0.3213	0.3213	Somatic	2.87003e-39	rs61743949
	1623	WES_Data2	NLRP7	19	55450746	55450746	C	T	nonsynonymous SNV	p.A481T	c.G1441A	T	Y	1	0.6824	-0.3176	Germline	6.48338e-28	rs61747414	COSM3757215
	1624	WES_Data2	NLRP2	19	55512232	55512232	C	A	nonsynonymous SNV	p.A1030E	c.C3089A	C	M	0	0.2667	0.2667	Somatic	2.12881e-05	rs1043673	COSM4000957
	1625	WES_Data2	GP6	19	55525497	55525497	A	G	nonsynonymous SNV	p.F606L	c.T1816C	A	R	0.0128	0.2625	0.2497	Somatic	1.80855e-06	rs1671150
	1626	WES_Data2	GP6	19	55525596	55525596	T	C	nonsynonymous SNV	p.R573G	c.A1717G	T	Y	0	0.2373	0.2373	Somatic	2.24897e-05	rs1654412	COSM5427694
	1627	WES_Data2	GP6	19	55526345	55526345	T	G	nonsynonymous SNV	p.N304H	c.A910C	T	K	0	0.3298	0.3298	Somatic	2.08052e-20	rs1671152	COSM1396466
	1628	WES_Data2	GP6	19	55526359	55526359	A	T	nonsynonymous SNV	p.L299Q	c.T896A	A	W	0	0.3295	0.3295	Somatic	2.88174e-18	rs1654413	COSM1396467
	1629	WES_Data2	GP6	19	55526373	55526373	G	C	nonsynonymous SNV	p.P314A	c.C940G	G	S	0	0.3742	0.3742	Somatic	2.881e-19	rs2304166	COSM1396468
	1630	WES_Data2	GP6	19	55527081	55527081	C	T	nonsynonymous SNV	p.A231T	c.G691A	C	Y	0.0081	0.2532	0.2451	Somatic	1.77073e-10	rs2304167	COSM3757227
	1631	WES_Data2	GP6	19	55530035	55530035	C	T	nonsynonymous SNV	p.E219K	c.G655A	C	Y	0	0.3443	0.3443	Somatic	1.79756e-23	rs1654416
	1632	WES_Data2	GP6	19	55536595	55536595	G	A	nonsynonymous SNV	p.P219S	c.C655T	G	R	0.0096	0.3	0.2904	Somatic	3.67999e-10	rs1613662	COSM3757228
	1633	WES_Data2	PTPRH	19	55693244	55693244	T	C	nonsynonymous SNV	p.I898V	c.A2692G	C	Y	0.9938	0.6951	-0.2987	Germline	5.76735e-18	rs2288419	COSM4132583
	1634	WES_Data2	PTPRH	19	55702910	55702910	C	A	nonsynonymous SNV	p.K603N	c.G1809T	A	M	1	0.631	-0.369	Germline	1.63926e-18	rs2288523	COSM4000966
	1635	WES_Data2	PTPRH	19	55703094	55703094	G	T	nonsynonymous SNV	p.A580D	c.C1739A	T	K	1	0.6496	-0.3504	Germline	1.3791e-30	rs61734204
	1636	WES_Data2	PTPRH	19	55708761	55708761	G	T	nonsynonymous SNV	p.Q394K	c.C1180A	T	K	0.9943	0.6699	-0.3244	Germline	5.77845e-20	rs61734206
	1637	WES_Data2	TMEM150B	19	55824332	55824332	T	G	nonsynonymous SNV	p.L199F	c.A597C	T	K	0	0.3099	0.3099	Somatic	4.51532e-21	rs7246479
	1638	WES_Data2	ZNF628	19	55993260	55993260	A	G	nonsynonymous SNV	p.T234A	c.A700G	G	R	1	0.6512	-0.3488	Germline	0.000165658	rs34864744	COSM3749553
	1639	WES_Data2	SBK2	19	56047448	56047448	A	G	nonsynonymous SNV	p.C72R	c.T214C	G	R	0.9969	0.6015	-0.3954	Germline	1.88229e-47	rs310453
	1640	WES_Data2	ZNF784	19	56133473	56133473	G	A	nonsynonymous SNV	p.R206C	c.C616T	A	R	1	0.6771	-0.3229	Germline	2.92598e-09	rs775958600	COSM4081632
	1641	WES_Data2	EPN1	19	56203174	56203174	A	G	nonsynonymous SNV	p.T248A	c.A742G	G	R	1	0.6984	-0.3016	Germline	2.04007e-05	rs766354936
	1642	WES_Data2	RFPL4A	19	56274116	56274116	A	G	nonsynonymous SNV	p.T147A	c.A439G	G	R	0.844	0.6893	-0.1547	Germline	8.88469e-13	rs201052090
	1643	WES_Data2	RFPL4AL1	19	56283289	56283289	A	G	nonsynonymous SNV	p.K40R	c.A119G	G	R	1	0.5444	-0.4556	Germline	8.49429e-12	rs2019945	COSM4132643
	1644	WES_Data2	RFPL4AL1	19	56283297	56283297	G	A	nonsynonymous SNV	p.D43N	c.G127A	A	R	1	0.5333	-0.4667	Germline	7.49304e-12	rs199759246	COSM4132644
	1645	WES_Data2	RFPL4AL1	19	56284090	56284090	G	A	nonsynonymous SNV	p.A137T	c.G409A	A	A	1	0.8975	-0.1025	Germline	2.73946e-13	rs202217602	COSM148755
	1646	WES_Data2	NLRP11	19	56320663	56320663	G	A	nonsynonymous SNV	p.P339L	c.C1016T	G	R	0	0.2941	0.2941	Somatic	5.83497e-18	rs12461110	COSM148757
	1647	WES_Data2	NLRP11	19	56321414	56321414	C	A	nonsynonymous SNV	p.A89S	c.G265T	C	M	0.0087	0.2857	0.277	Somatic	1.57407e-21	rs299163
	1648	WES_Data2	NLRP4	19	56369189	56369189	G	A	nonsynonymous SNV	p.A144T	c.G430A	A	R	0.9965	0.6098	-0.3867	Germline	3.95301e-39	rs441827	COSM3757275
	1649	WES_Data2	NLRP4	19	56390237	56390237	A	T	nonsynonymous SNV	p.Q925L	c.A2774T	T	W	0.9898	0.562	-0.4278	Germline	3.70337e-31	rs302453	COSM4417684
	1650	WES_Data2	NLRP13	19	56424395	56424395	G	A	nonsynonymous SNV	p.S263F	c.C788T	G	R	0.0079	0.2901	0.2822	Somatic	1.23075e-12	rs137923694	COSM3893611
	1651	WES_Data2	NLRP8	19	56477710	56477710	T	C	nonsynonymous SNV	p.V782A	c.T2345C	T	Y	0.0091	0.3333	0.3242	Somatic	2.92212e-13	rs306496	COSM3757290
	1652	WES_Data2	NLRP8	19	56499279	56499279	G	C	stoploss	p.X1030Y	c.G3090C	C	S	1	0.5789	-0.4211	Germline	1.16434e-13	rs306457	COSM5428606
	1653	WES_Data2	ZNF667	19	56953585	56953585	T	C	nonsynonymous SNV	p.K260R	c.A779G	C	Y	0.9868	0.6067	-0.3801	Germline	1.82986e-10	rs3760849
	1654	WES_Data2	ZNF667	19	56953963	56953963	G	A	nonsynonymous SNV	p.P134L	c.C401T	G	R	0	0.2931	0.2931	Somatic	2.72079e-10	rs35914474	COSM4154374
	1655	WES_Data2	ZNF471	19	57036012	57036012	G	T	nonsynonymous SNV	p.M118I	c.G354T	G	K	0.0172	0.3721	0.3549	Somatic	1.97621e-06	rs11667052
	1656	WES_Data2	ZNF471	19	57036653	57036653	G	A	nonsynonymous SNV	p.G332D	c.G995A	G	R	0.0167	0.2824	0.2657	Somatic	7.2013e-06	rs3752176	COSM3757297
	1657	WES_Data2	ZNF471	19	57037103	57037103	C	G	nonsynonymous SNV	p.S482C	c.C1445G	C	S	0	0.3167	0.3167	Somatic	2.64354e-13	rs16987303
	1658	WES_Data2	ZFP28	19	57062047	57062047	C	T	nonsynonymous SNV	p.S324F	c.C971T	T	Y	1	0.5797	-0.4203	Germline	1.87756e-09	rs1990575	COSN15629827
	1659	WES_Data2	ZFP28	19	57066013	57066013	C	T	nonsynonymous SNV	p.A620V	c.C1859T	C	Y	0.0089	0.3451	0.3362	Somatic	1.00552e-12	rs10409531	COSM148775
	1660	WES_Data2	ZNF470	19	57085769	57085769	G	C	nonsynonymous SNV	p.V23L	c.G67C	G	S	0	0.3203	0.3203	Somatic	5.52926e-13	rs10421285	COSM148776
	1661	WES_Data2	ZNF470	19	57089050	57089050	C	T	nonsynonymous SNV	p.T418I	c.C1253T	C	Y	0	0.2742	0.2742	Somatic	4.02574e-10	rs4801177	COSM1180616
	1662	WES_Data2	ZNF835	19	57176304	57176304	T	G	nonsynonymous SNV	p.E88A	c.A263C	T	K	0.0195	0.3284	0.3089	Somatic	1.356e-18	rs12460400	COSM3757305
	1663	WES_Data2	ZNF835	19	57176482	57176482	C	T	nonsynonymous SNV	p.E29K	c.G85A	C	Y	0.0141	0.3125	0.2984	Somatic	2.58338e-13	rs12462469	COSM3757306
	1664	WES_Data2	USP29	19	57641146	57641146	A	G	nonsynonymous SNV	p.N368S	c.A1103G	G	G	1	0.8824	-0.1176	Germline	0.0221188	rs1027392
	1665	WES_Data2	USP29	19	57642782	57642782	C	A	stopgain	p.Y913X	c.C2739A	A	M	1	0.6133	-0.3867	Germline	3.12211e-09	rs9973206
	1666	WES_Data2	ZIM3	19	57646570	57646570	T	C	nonsynonymous SNV	p.I379V	c.A1135G	C	Y	1	0.6667	-0.3333	Germline	4.78875e-08	rs4801433	COSM3757308
	1667	WES_Data2	ZIM3	19	57647236	57647236	T	C	nonsynonymous SNV	p.N157D	c.A469G	C	Y	1	0.6869	-0.3131	Germline	4.77261e-11	rs7252632	COSM1396954
	1668	WES_Data2	ZIM3	19	57648277	57648277	A	T	nonsynonymous SNV	p.L69M	c.T205A	T	W	0.9881	0.68	-0.3081	Germline	4.55809e-10	rs4801200	COSM3757310
	1669	WES_Data2	ZIM3	19	57649962	57649962	C	T	nonsynonymous SNV	p.R7K	c.G20A	C	Y	0.015	0.2553	0.2403	Somatic	7.74011e-10	rs10407445
	1670	WES_Data2	ZNF543	19	57838018	57838018	C	G	nonsynonymous SNV	p.P55A	c.C163G	C	S	0	0.2727	0.2727	Somatic	3.33726e-06	rs6510057	COSM5425452
	1671	WES_Data2	ZNF543	19	57840547	57840547	A	G	nonsynonymous SNV	p.M573V	c.A1717G	A	R	0	0.2941	0.2941	Somatic	1.65828e-15	rs10410649	COSM3757323
	1672	WES_Data2	ZNF154	19	58213952	58213952	C	A	nonsynonymous SNV	p.G122V	c.G365T	A	M	1	0.7288	-0.2712	Germline	1.18261e-14	rs2074078	COSM3757346
	1673	WES_Data2	ZNF587B	19	58355699	58355699	T	C	nonsynonymous SNV	p.C400R	c.T1198C	C	C	1	0.7692	-0.2308	Germline	0.00148747	rs8103104	COSM4593474
	1674	WES_Data2	ZNF417	19	58420162	58420162	T	C	nonsynonymous SNV	p.N494S	c.A1481G	C	Y	1	0.694	-0.306	Germline	2.8939e-18	rs10416584
	1675	WES_Data2	ZNF417	19	58420699	58420699	C	A	nonsynonymous SNV	p.R315L	c.G944T	A	M	0.9938	0.6818	-0.312	Germline	3.14107e-33	rs3745133	COSM148790
	1676	WES_Data2	ZNF417	19	58421128	58421128	C	T	nonsynonymous SNV	p.R172H	c.G515A	T	Y	0.9915	0.6593	-0.3322	Germline	2.76721e-39	rs3826671	COSM3773917
	1677	WES_Data2	ZNF606	19	58491627	58491627	T	C	nonsynonymous SNV	p.S51G	c.A151G	C	Y	1	0.7404	-0.2596	Germline	4.44275e-09	rs11673029	COSM4001033
	1678	WES_Data2	ZNF135	19	58572979	58572979	G	A	nonsynonymous SNV	p.G34D	c.G101A	A	R	0.9932	0.6852	-0.308	Germline	1.42977e-15	rs1469087	COSM4132692
	1679	WES_Data2	A1BG	19	58864479	58864479	T	C	nonsynonymous SNV	p.H52R	c.A155G	T	Y	0	0.3236	0.3236	Somatic	2.29567e-28	rs893184	COSM3720655
	1680	WES_Data2	ZNF837	19	58879976	58879976	C	T	nonsynonymous SNV	p.A242T	c.G724A	C	Y	0	0.2857	0.2857	Somatic	7.85823e-11	rs7255596	COSM3749571
	1681	WES_Data2	RNF225	19	58907700	58907700	G	A	nonsynonymous SNV	p.D82N	c.G244A	A	R	0.9843	0.6034	-0.3809	Germline	1.46981e-17	rs112710702
	1682	WES_Data2	RNF225	19	58908150	58908150	C	G	nonsynonymous SNV	p.P232A	c.C694G	C	S	0	0.383	0.383	Somatic	4.80418e-06	rs13343526
	1683	WES_Data2	ZNF584	19	58928751	58928751	G	A	nonsynonymous SNV	p.R289Q	c.G866A	A	R	0.9944	0.6225	-0.3719	Germline	7.38151e-24	rs35111737
	1684	WES_Data2	ZNF584	19	58928786	58928786	A	G	nonsynonymous SNV	p.T301A	c.A901G	A	R	0.0053	0.3362	0.3309	Somatic	1.6596e-22	rs7257872
	1685	WES_Data2	ZNF132	19	58946056	58946056	G	A	nonsynonymous SNV	p.P252L	c.C755T	G	R	0	0.2909	0.2909	Somatic	2.62991e-19	rs1465789
	1686	WES_Data2	ZNF446	19	58989495	58989495	A	C	nonsynonymous SNV	p.N192H	c.A574C	A	M	0.0083	0.3651	0.3568	Somatic	8.8181e-15	rs893185	COSM4001036
	1687	WES_Data2	ZNF446	19	58991900	58991900	G	A	nonsynonymous SNV	p.R387H	c.G1160A	G	R	0	0.3578	0.3578	Somatic	6.02803e-49	rs882610	COSM3746507
	1688	WES_Data2	MZF1	19	59074653	59074653	T	C	nonsynonymous SNV	p.I331V	c.A991G	C	Y	1	0.6728	-0.3272	Germline	1.55344e-29	rs4756	COSM3757370
	1689	WES_Data2	MZF1	19	59082368	59082368	C	T	nonsynonymous SNV	p.R130Q	c.G389A	T	Y	0.9934	0.6816	-0.3118	Germline	5.15025e-17	rs3752111	COSM3757371
	1690	WES_Data2	MZF1	19	59082605	59082605	C	T	nonsynonymous SNV	p.R51H	c.G152A	C	Y	0.0039	0.3312	0.3273	Somatic	6.20379e-30	rs3752109
	1691	WES_Data2	CD93	20	23065209	23065209	G	A	nonsynonymous SNV	p.P541S	c.C1621T	R	R	0.4747	0.5973	0.1226	Germline	0.0154565	rs3746731	COSM3758486
	1692	WES_Data2	PIGT	20	44048972	44048972	A	C	nonsynonymous SNV	p.D155A	c.A464C	M	M	0.4067	0.5276	0.1209	Germline	0.0132922	rs61753669
	1693	WES_Data2	BHLHE23	20	61637727	61637727	C	A	nonsynonymous SNV	p.D134Y	c.G400T	C	M	0	0.5714	0.5714	Somatic	7.05939e-13	rs755674868
	1694	WES_Data2	HELZ2	20	62195220	62195220	C	T	nonsynonymous SNV	p.R1083Q	c.G3248A	Y	Y	0.3955	0.5291	0.1336	Germline	0.00824005	rs3827022	COSM3749739
	1695	WES_Data2	HELZ2	20	62195710	62195710	C	T	nonsynonymous SNV	p.A920T	c.G2758A	Y	Y	0.45	0.5602	0.1102	Germline	0.0165279	rs187627701
	1696	WES_Data2	BAGE2;BAGE3	21	11058316	11058316	G	T	nonsynonymous SNV	p.H42N	c.C124A	G	K	0.1367	0.2523	0.1156	Somatic	0.0163961	rs3877860	COSN14654319
	1697	WES_Data2	SETD4	21	37408491	37408491	G	C	nonsynonymous SNV	p.S416C	c.C1247G	S	S	0.3474	0.6176	0.2702	Germline	0.000545485	rs76492178
	1698	WES_Data2	TMPRSS3	21	43808627	43808627	C	T	nonsynonymous SNV	p.G111S	c.G331A	Y	Y	0.3667	0.5546	0.1879	Germline	0.00154653	rs35227181	COSM3758907
	1699	WES_Data2	HPS4	22	26859942	26859942	C	T	nonsynonymous SNV	p.V547M	c.G1639A	Y	Y	0.4159	0.6154	0.1995	Germline	0.00791003	rs5752330
	1700	WES_Data2	SLC16A8	22	38477342	38477342	T	A	nonsynonymous SNV	p.R235W	c.A703T	W	W	0.2979	0.5641	0.2662	Germline	0.0113761	rs4289289	COSM3749767
	1701	WES_Data2	KDELR3	22	38877461	38877461	T	G	nonsynonymous SNV	p.V199G	c.T596G	K	K	0.4351	0.5982	0.1631	Germline	0.00606675	rs12004	COSM4002181
	1702	WES_Data2	EFCAB6	22	44131786	44131786	T	C	nonsynonymous SNV	p.R47G	c.A139G	Y	Y	0.4143	0.6944	0.2801	Germline	0.00545017	rs3747203	COSM4418142
	1703	WES_Data2	GTSE1	22	46704676	46704676	A	G	nonsynonymous SNV	p.T200A	c.A598G	R	R	0.4205	0.5379	0.1174	Germline	0.0234847	rs6008600	COSM3736298
	1704	WES_Data2	SBF1	22	50893057	50893057	G	T	nonsynonymous SNV	p.P1643T	c.C4927A	K	K	0.4516	0.625	0.1734	Germline	0.0296013	rs202049257
	1705	WES_Data2	TYMP	22	50965617	50965617	C	A	nonsynonymous SNV	p.A248S	c.G742T	M	M	0.4516	0.5795	0.1279	Germline	0.0447643	.
	1706	WES_Data2	FAM47A	X	34148877	34148877	C	G	nonsynonymous SNV	p.E507Q	c.G1519C	S	S	0.2683	0.5263	0.258	Germline	0.0497372	rs5973088	COSM1138136
	1707	WES_Data2	FAM47A	X	34148882	34148882	C	T	nonsynonymous SNV	p.R505H	c.G1514A	Y	Y	0.25	0.5263	0.2763	Germline	0.0370006	rs5973089	COSM488335
	1708	WES_Data2	FBXO2	1	11710779	11710779	C	GCG	frameshift substitution	p.Y46Afs*71	c.135delinsCGC	*/+GCG	*/+GCG	0.2963	0.4571	0.1608	Germline	0.0305877
	1709	WES_Data2	RPL14	3	40503520	40503520	A	CTGCTGCTGCTGCTG	frameshift substitution	p.T149Lfs*76	c.445delinsCTGCTGCTGCTGCTG	*/+CTGCTGCTGCTGCTG	*/+CTGCTGCTGCTGCTG	0.2459	0.4259	0.18	Germline	0.032065
	1710	WES_Data2	ATXN7	3	63898390	63898390	A	GCC	frameshift substitution	p.Q39Rfs*51	c.116delinsGCC	*/+GCC	*/+GCC	0.2083	0.5	0.2917	Germline	0.0431249
	1711	WES_Data2	ADAMTS19	5	128797315	128797315	T	CCCGGC	frameshift substitution	p.G206Afs*45	c.612delinsCCCGGC	*/+CCCGGC	*/+CCCGGC	0.2424	0.45	0.2076	Germline	0.00283554
	1712	WES_Data2	VWA7	6	31740763	31740763	A	CAGGCTCCATGGGG	frameshift substitution	p.V352Afs*13	c.1055delinsCCCCATGGAGCCTG	A	*/+CAGGCTCCATGGGG	0.1962	0.4158	0.2196	Somatic	3.18399e-07
	1713	WES_Data2	PRICKLE4	6	41754573	41754573	C	CTT	frameshift substitution	p.L288Ffs*68	c.861delinsCTT	*/+CTT	*/+CTT	0.3033	0.6292	0.3259	Germline	7.56233e-28	rs140326303
	1714	WES_Data2	MAP3K5	6	136913666	136913666	T	GTC	frameshift substitution	p.T989Dfs*3	c.2965delinsGAC	*/+GTC	*/+GTC	0.2372	0.5175	0.2803	Germline	1.85737e-06
	1715	WES_Data2	SASH1	6	148664242	148664242	T	GAGCCC	frameshift substitution	p.E14Sfs*36	c.39delinsGAGCCC	*/+GAGCCC	*/+GAGCCC	0.5844	0.2466	-0.3378	Germline	2.36814e-05
	1716	WES_Data2	PRAG1	8	8234868	8234868	C	GCCGCT	frameshift substitution	p.A351Sfs*18	c.1051delinsAGCGGC	C	*/+GCCGCT	0.1748	0.3148	0.14	Somatic	0.00059051
	1717	WES_Data2	SKIDA1	10	21805466	21805466	C	CCTCCT	frameshift substitution	p.G429Efs*118	c.1286delinsAGGAGG	C	*/+CCTCCT	0	0.6667	0.6667	Somatic	1.72203e-07
	1718	WES_Data2	ARHGEF17	11	73020375	73020375	G	CTC	frameshift substitution	p.C231Sfs*83	c.692delinsCTC	*/+CTC	*/+CTC	0.2778	0.4568	0.179	Germline	0.0114559
	1719	WES_Data2	CAMKK2	12	121678327	121678327	C	TTT	frameshift substitution	p.G539Kfs*5	c.1615delinsAAA	*/+TTT	*/+TTT	0.2647	0.45	0.1853	Germline	0.0397624
	1720	WES_Data2	BHMG1	19	46265047	46265047	A	TCCAGC	frameshift substitution	p.S453Pfs*69	c.1356delinsTCCAGC	*/+TCCAGC	*/+TCCAGC	0.6	0.3814	-0.2186	Germline	4.29231e-05
	1721	WES_Data2	NR1H2	19	50881820	50881820	A	AAC	frameshift substitution	p.K75Nfs*48	c.223delinsAAC	A	*/+AAC	0.007	0.2395	0.2325	Somatic	3.40517e-11
	1722	WES_Data2	ZNF880	19	52887246	52887246	T	CAA	frameshift substitution	p.I138Tfs*5	c.413delinsCAA	T	*/+CAA	0.2188	0.2188	Somatic	0.0165865
	1723	WES_Data2	ZNF816	19	53454475	53454475	C	ACT	frameshift substitution	p.G185Sfs*40	c.553delinsAGT	C	*/+ACT	0.25	0.25	Somatic	0.000475122
	1724	WES_Data2	HSPBP1	19	55790886	55790886	A	GCCGCCGCC	frameshift substitution	p.S77Gfs*38	c.229delinsGGCGGCGGC	#NAME?	*/+GCCGCCGCC	0.3611	-0.4547	Germline	4.95633e-10
	1725	WES_Data2	SSC5D	19	56029616	56029616	C	CCA	frameshift substitution	p.T1326Pfs*29	c.3973delinsCCA	C	*/+CCA	0.28	0.269	Somatic	2.74797e-08
	1726	WES_Data2	ZNF579	19	56089908	56089908	C	CCG	frameshift substitution	p.Q367Gfs*38	c.1098delinsCGG	#NAME?	*/+CCG	0.6535	-0.2632	Germline	9.44187e-05

## Sheet: Table_S8_gene_CN
	#	Gene	Entrez ID	Cytoband	WES Data1 log2 CN somatic alteration	WES Data2 log2 CN somatic alteration	Gene Status
	1	A1BG	1	19q13.43	0	0.338	neutral
	2	A1BG-AS1	503538	19q13.43	-0.125	0.338	neutral
	3	A1CF	29974	10q11.23	0.144	0	neutral
	4	A2LD1	87769	13q32.3	0	0	neutral
	5	A2M	2	12p13.31	0.124	-0.137	neutral
	6	A2ML1	144568	12p13.31	0.124	-0.137	neutral
	7	A2MP1	3	12p13.31	0.124	0	neutral
	8	A4GALT	53947	22q13.2	0	0	neutral
	9	A4GNT	51146	3q22.3	-0.134	0	neutral
	10	AA06	100506677	17q12	-0.405	0	neutral
	11	AAA1	404744	7p14.3	0	0	neutral
	12	AAAS	8086	12q13.13	0	0	neutral
	13	AACS	65985	12q24.31	0	0	neutral
	14	AACSP1	729522	5q35.3	0	0	neutral
	15	AADAC	13	3q25.1	-0.148	-0.173	neutral
	16	AADACL2	344752	3q25.1	-0.148	-0.173	neutral
	17	AADACL3	126767	1p36.21	0.498	-0.146	neutral
	18	AADACL4	343066	1p36.21	0.498	-0.146	neutral
	19	AADAT	51166	4q33	-0.145	0.501	neutral
	20	AAGAB	79719	15q22.33	0	0	neutral
	21	AAK1	22848	2p13.3	-0.213	0	neutral
	22	AAMP	14	2q35	-0.186	0	neutral
	23	AANAT	15	17q25.1	0	0	neutral
	24	AARS	16	16q22.1	0	0.556	neutral
	25	AARS2	57505	6p21.1	0	0	neutral
	26	AARSD1	80755	17q21.31	-0.405	0	neutral
	27	AASDH	132949	4q12	0	-0.163	neutral
	28	AASDHPPT	60496	11q22.3	0	0	neutral
	29	AASS	10157	7q31.32	-0.201	0	neutral
	30	AATF	26574	17q12	-0.405	0	neutral
	31	AATK	9625	17q25.3	0	0	neutral
	32	AATK-AS1	388428	17q25.3	0	0	neutral
	33	ABAT	18	16p13.2	0	0	neutral
	34	ABCA1	19	9q31.1	0	0	neutral
	35	ABCA10	10349	17q24.3	-0.176	-0.578	neutral
	36	ABCA11P	79963	4p16.3	-0.131	0	neutral
	37	ABCA12	26154	2q35	0.339	0	neutral
	38	ABCA13	154664	7p12.3	0	0	neutral
	39	ABCA17P	650655	16p13.3	0	0	neutral
	40	ABCA2	20	9q34.3	0	0	neutral
	41	ABCA3	21	16p13.3	0	0	neutral
	42	ABCA4	24	1p22.1	0.59	0	neutral
	43	ABCA5	23461	17q24.3	-0.176	-0.578	neutral
	44	ABCA6	23460	17q24.2	-0.176	-0.578	neutral
	45	ABCA7	10347	19p13.3	-0.149	-0.155	neutral
	46	ABCA8	10351	17q24.2	-0.176	-0.578	neutral
	47	ABCA9	10350	17q24.2	-0.176	-0.578	neutral
	48	ABCB1	5243	7q21.12	0	-0.124	neutral
	49	ABCB10	23456	1q42.13	-0.209	0	neutral
	50	ABCB11	8647	2q31.1	0	0	neutral
	51	ABCB4	5244	7q21.12	0	-0.124	neutral
	52	ABCB5	340273	7p21.1	0	0	neutral
	53	ABCB6	10058	2q35	-0.186	0	neutral
	54	ABCB8	11194	7q36.1	-0.186	0	neutral
	55	ABCB9	23457	12q24.31	0.12	0	neutral
	56	ABCC1	4363	16p13.11	0	0	neutral
	57	ABCC10	89845	6p21.1	0	0	neutral
	58	ABCC11	85320	16q12.1	0	0.556	neutral
	59	ABCC12	94160	16q12.1	0	0.556	neutral
	60	ABCC13	150000	21q11.2	0	-0.126	neutral
	61	ABCC2	1244	10q24.2	0	0	neutral
	62	ABCC3	8714	17q21.33	-0.405	0	neutral
	63	ABCC4	10257	13q32.1	0	0	neutral
	64	ABCC5	10057	3q27.1	-0.114	0.482	neutral
	65	ABCC6	368	16p13.11	0	0	neutral
	66	ABCC6P1	653190	16p12.3	0	0.556	neutral
	67	ABCC6P2	730013	16p13.11	0	0	neutral
	68	ABCC8	6833	11p15.1	0.25	0	neutral
	69	ABCC9	10060	12p12.1	0	0	neutral
	70	ABCD2	225	12q12	0.414	0	neutral
	71	ABCD3	5825	1p21.3	-0.102	0	neutral
	72	ABCD4	5826	14q24.3	0.102	0	neutral
	73	ABCE1	6059	4q31.21	0	-0.102	neutral
	74	ABCF1	23	6p21.33	0	0	neutral
	75	ABCF2	10061	7q36.1	-0.186	0	neutral
	76	ABCF3	55324	3q27.1	-0.114	0.482	neutral
	77	ABCG1	9619	21q22.3	0.157	-0.107	neutral
	78	ABCG2	9429	4q22.1	0	-0.163	neutral
	79	ABCG4	64137	11q23.3	0	0	neutral
	80	ABCG5	64240	2p21	-0.132	0.118	neutral
	81	ABCG8	64241	2p21	-0.132	0.118	neutral
	82	ABHD1	84696	2p23.3	-0.216	0	neutral
	83	ABHD10	55347	3q13.2	0	0	neutral
	84	ABHD11	83451	7q11.23	0	-0.124	neutral
	85	ABHD11-AS1	171022	7q11.23	0	-0.124	neutral
	86	ABHD12	26090	20p11.21	0.124	-0.637	neutral
	87	ABHD12B	145447	14q22.1	0	0	neutral
	88	ABHD13	84945	13q33.3	-0.114	0	neutral
	89	ABHD14A	25864	3p21.2	0	0.341	neutral
	90	ABHD14A-ACY1	100526760	3p21.2	0	0.341	neutral
	91	ABHD14B	84836	3p21.2	0	0.341	neutral
	92	ABHD15	116236	17q11.2	-0.405	0	neutral
	93	ABHD16A	7920	6p21.33	0	-0.496	neutral
	94	ABHD16B	140701	20q13.33	0.124	0	neutral
	95	ABHD2	11057	15q26.1	0	0	neutral
	96	ABHD3	171586	18q11.2	-0.154	0	neutral
	97	ABHD4	63874	14q11.2	0	0	neutral
	98	ABHD5	51099	3p21.33	0	-0.333	neutral
	99	ABHD6	57406	3p14.3	-0.401	0	neutral
	100	ABHD8	79575	19p13.11	0.287	0	neutral
	101	ABI1	10006	10p12.1	-0.133	-0.462	neutral
	102	ABI2	10152	2q33.2	-0.301	0.133	neutral
	103	ABI3	51225	17q21.32	-0.405	0	neutral
	104	ABI3BP	25890	3q12.2	-0.401	0	neutral
	105	ABL1	25	9q34.12	0.267	0.207	neutral
	106	ABL2	27	1q25.2	-0.442	0	neutral
	107	ABLIM1	3983	10q25.3	0	0	neutral
	108	ABLIM2	84448	4p16.1	-0.131	0	neutral
	109	ABLIM3	22885	5q32	0	0	neutral
	110	ABO	28	9q34.2	0.267	0.207	neutral
	111	ABP1	26	7q36.1	-0.186	0	neutral
	112	ABR	29	17p13.3	0	0	neutral
	113	ABRA	137735	8q23.1	0	0	neutral
	114	ABT1	29777	6p22.2	-0.305	0	neutral
	115	ABTB1	80325	3q21.3	-0.385	0	neutral
	116	ABTB2	25841	11p13	0	0	neutral
	117	ACAA1	30	3p22.2	0	0	neutral
	118	ACAA2	10449	18q21.1	-0.207	0	neutral
	119	ACACA	31	17q12	-0.405	0	neutral
	120	ACACB	32	12q24.11	0.12	-0.178	neutral
	121	ACAD10	80724	12q24.12	0.12	-0.178	neutral
	122	ACAD11	84129	3q22.1	-0.385	0	neutral
	123	ACAD8	27034	11q25	0	0	neutral
	124	ACAD9	28976	3q21.3	-0.385	0	neutral
	125	ACADL	33	2q34	-0.301	0.133	neutral
	126	ACADM	34	1p31.1	0	0	neutral
	127	ACADS	35	12q24.31	0.12	0	neutral
	128	ACADSB	36	10q26.13	0	0.981	neutral
	129	ACADVL	37	17p13.1	0	0	neutral
	130	ACAN	176	15q26.1	0	0	neutral
	131	ACAP1	9744	17p13.1	0	0	neutral
	132	ACAP2	23527	3q29	-0.114	0.482	neutral
	133	ACAP3	116983	1p36.33	-0.119	0	neutral
	134	ACAT1	38	11q22.3	0	0.265	neutral
	135	ACAT2	39	6q25.3	0	0.184	neutral
	136	ACBD3	64746	1q42.12	-0.209	0	neutral
	137	ACBD4	79777	17q21.31	-0.405	0	neutral
	138	ACBD5	91452	10p12.1	-0.133	-0.462	neutral
	139	ACBD6	84320	1q25.2	-0.158	0	neutral
	140	ACBD7	414149	10p13	0	0.327	neutral
	141	ACCN1	40	17q11.2	-0.405	0	neutral
	142	ACCN2	41	12q13.12	0.414	0	neutral
	143	ACCN3	9311	7q36.1	-0.186	0	neutral
	144	ACCN4	55515	2q35	-0.186	0	neutral
	145	ACCN5	51802	4q32.1	0	0	neutral
	146	ACCS	84680	11p11.2	0	0	neutral
	147	ACCSL	390110	11p11.2	0	0	neutral
	148	ACD	65057	16q22.1	0	0.556	neutral
	149	ACE	1636	17q23.3	-0.405	-0.33	loss
	150	ACER1	125981	19p13.3	-0.149	-0.155	neutral
	151	ACER2	340485	9p22.1	0	0	neutral
	152	ACER3	55331	11q13.5	0	0.136	neutral
	153	ACHE	43	7q22.1	0	-0.124	neutral
	154	ACIN1	22985	14q11.2	0	0	neutral
	155	ACLY	47	17q21.2	-0.405	0	neutral
	156	ACMSD	130013	2q21.3	-0.194	0	neutral
	157	ACN9	57001	7q21.3	0	-0.124	neutral
	158	ACO1	48	9p21.1	0	0	neutral
	159	ACO2	50	22q13.2	0	0	neutral
	160	ACOT1	641371	14q24.3	0.102	0	neutral
	161	ACOT11	26027	1p32.3	-0.432	0	neutral
	162	ACOT12	134526	5q14.1	0.265	0	neutral
	163	ACOT13	55856	6p22.3	0	-0.128	neutral
	164	ACOT2	10965	14q24.3	0.102	0	neutral
	165	ACOT4	122970	14q24.3	0.102	0	neutral
	166	ACOT6	641372	14q24.3	0.102	0	neutral
	167	ACOT7	11332	1p36.31	-0.119	0	neutral
	168	ACOT8	10005	20q13.12	0.124	-0.637	neutral
	169	ACOX1	51	17q25.1	0	0	neutral
	170	ACOX2	8309	3p14.3	-0.401	0	neutral
	171	ACOX3	8310	4p16.1	0	0	neutral
	172	ACOXL	55289	2q13	-0.206	0.231	neutral
	173	ACP1	52	2p25.3	-0.403	0.2	neutral
	174	ACP2	53	11p11.2	0	0	neutral
	175	ACP5	54	19p13.2	-0.149	-0.155	neutral
	176	ACP6	51205	1q21.2	-0.169	0	neutral
	177	ACPL2	92370	3q23	0	0	neutral
	178	ACPP	55	3q22.1	-0.385	0	neutral
	179	ACPT	93650	19q13.33	0	0	neutral
	180	ACR	49	22q13.33	0	0	neutral
	181	ACRBP	84519	12p13.31	0	0	neutral
	182	ACRV1	56	11q24.2	0	0	neutral
	183	ACSBG1	23205	15q25.1	0	0	neutral
	184	ACSBG2	81616	19p13.3	-0.149	-0.155	neutral
	185	ACSF2	80221	17q21.33	-0.405	0	neutral
	186	ACSF3	197322	16q24.3	0.16	0	neutral
	187	ACSL1	2180	4q35.1	0	0.501	neutral
	188	ACSL3	2181	2q36.1	-0.186	0	neutral
	189	ACSL5	51703	10q25.2	0	0	neutral
	190	ACSL6	23305	5q31.1	0.155	-0.153	neutral
	191	ACSM1	116285	16p12.3	0	0.556	neutral
	192	ACSM2A	123876	16p12.3	0	0.556	neutral
	193	ACSM2B	348158	16p12.3	0	0.556	neutral
	194	ACSM3	6296	16p12.3	0	0.556	neutral
	195	ACSM4	341392	12p13.31	0	0	neutral
	196	ACSM5	54988	16p12.3	0	0.556	neutral
	197	ACSS1	84532	20p11.21	0.124	-0.637	neutral
	198	ACSS2	55902	20q11.22	0.124	-0.637	neutral
	199	ACSS3	79611	12q21.31	0.143	0	neutral
	200	ACTA1	58	1q42.13	-0.209	0	neutral
	201	ACTA2	59	10q23.31	0.545	0	neutral
	202	ACTB	60	7p22.1	0	0	neutral
	203	ACTBL2	345651	5q11.2	0.668	0.784	gain
	204	ACTC1	70	15q14	0	0	neutral
	205	ACTG1	71	17q25.3	0	0	neutral
	206	ACTG2	72	2p13.1	-0.213	0	neutral
	207	ACTL10	170487	20q11.22	0.124	-0.637	neutral
	208	ACTL6A	86	3q26.33	-0.114	-0.542	neutral
	209	ACTL6B	51412	7q22.1	0	-0.124	neutral
	210	ACTL7A	10881	9q31.3	0.162	0	neutral
	211	ACTL7B	10880	9q31.3	0.162	0	neutral
	212	ACTL8	81569	1p36.13	0.367	0.162	neutral
	213	ACTL9	284382	19p13.2	-0.149	-0.155	neutral
	214	ACTN1	87	14q24.1	0	0	neutral
	215	ACTN2	88	1q43	-0.331	0.404	neutral
	216	ACTN3	89	11q13.2	0	0	neutral
	217	ACTN4	81	19q13.2	0	0	neutral
	218	ACTR10	55860	14q23.1	0	0	neutral
	219	ACTR1A	10121	10q24.32	0	0	neutral
	220	ACTR1B	10120	2q11.2	0.129	0.231	neutral
	221	ACTR2	10097	2p14	-0.213	0	neutral
	222	ACTR3	10096	2q14.1	-0.206	0.231	neutral
	223	ACTR3B	57180	7q36.1	-0.186	0	neutral
	224	ACTR3BP2	440888	2p11.1	0.129	0.231	neutral
	225	ACTR3BP5	399746	10p11.1	-0.133	-0.462	neutral
	226	ACTR3C	653857	7q36.1	-0.186	0	neutral
	227	ACTR5	79913	20q11.23	0.124	-0.637	neutral
	228	ACTR6	64431	12q23.1	0	0.179	neutral
	229	ACTR8	93973	3p21.1	0	0	neutral
	230	ACTRT2	140625	1p36.32	-0.119	0	neutral
	231	ACVR1	90	2q24.1	0	0	neutral
	232	ACVR1B	91	12q13.13	0.414	0	neutral
	233	ACVR1C	130399	2q24.1	0	0	neutral
	234	ACVR2A	92	2q22.3	0	0	neutral
	235	ACVR2B	93	3p22.2	0	0	neutral
	236	ACVRL1	94	12q13.13	0.414	0	neutral
	237	ACY1	95	3p21.2	0	0.341	neutral
	238	ACY3	91703	11q13.2	0	0	neutral
	239	ACYP1	97	14q24.3	0	0	neutral
	240	ACYP2	98	2p16.2	0	0.118	neutral
	241	ADA	100	20q13.12	0.124	-0.637	neutral
	242	ADAD1	132612	4q27	0	0	neutral
	243	ADAD2	161931	16q24.1	0.16	0	neutral
	244	ADAL	161823	15q15.3	0	0	neutral
	245	ADAM1	8759	12q24.13	0.12	-0.178	neutral
	246	ADAM10	102	15q21.3	0	0	neutral
	247	ADAM11	4185	17q21.31	-0.405	0	neutral
	248	ADAM12	8038	10q26.2	0	0.981	neutral
	249	ADAM15	8751	1q22	-0.169	0	neutral
	250	ADAM17	6868	2p25.1	-0.216	0	neutral
	251	ADAM18	8749	8p11.22	0	0	neutral
	252	ADAM19	8728	5q33.3	0	0	neutral
	253	ADAM2	2515	8p11.22	0	0	neutral
	254	ADAM20	8748	14q24.2	0.115	0	neutral
	255	ADAM21	8747	14q24.2	0.115	0	neutral
	256	ADAM21P1	145241	14q24.2	0.115	0	neutral
	257	ADAM22	53616	7q21.12	0	-0.124	neutral
	258	ADAM23	8745	2q33.3	-0.301	0.133	neutral
	259	ADAM28	10863	8p21.2	0	0	neutral
	260	ADAM29	11086	4q34.1	-0.145	0.501	neutral
	261	ADAM30	11085	1p12	-0.601	-0.116	neutral
	262	ADAM32	203102	8p11.22	-0.117	0	neutral
	263	ADAM33	80332	20p13	0.124	-0.637	neutral
	264	ADAM3A	1587	8p11.22	0	-0.64	neutral
	265	ADAM5P	255926	8p11.22	0	0	neutral
	266	ADAM6	8755	14q32.33	0.505	0.165	neutral
	267	ADAM7	8756	8p21.2	0	0	neutral
	268	ADAM8	101	10q26.3	-0.154	0	neutral
	269	ADAM9	8754	8p11.22	-0.117	0	neutral
	270	ADAMDEC1	27299	8p21.2	0	0	neutral
	271	ADAMTS1	9510	21q21.3	0.281	0	neutral
	272	ADAMTS10	81794	19p13.2	-0.149	-0.155	neutral
	273	ADAMTS12	81792	5p13.3	0	0	neutral
	274	ADAMTS13	11093	9q34.2	0.267	0.207	neutral
	275	ADAMTS14	140766	10q22.1	-0.17	0	neutral
	276	ADAMTS15	170689	11q24.3	0	0	neutral
	277	ADAMTS16	170690	5p15.32	0	0	neutral
	278	ADAMTS17	170691	15q26.3	0	0	neutral
	279	ADAMTS18	170692	16q23.1	0.16	0	neutral
	280	ADAMTS19	171019	5q23.3	0.155	-0.153	neutral
	281	ADAMTS2	9509	5q35.3	0	0	neutral
	282	ADAMTS20	80070	12q12	0.414	0	neutral
	283	ADAMTS3	9508	4q13.3	0	-0.163	neutral
	284	ADAMTS4	9507	1q23.3	0.231	0	neutral
	285	ADAMTS5	11096	21q21.3	0	0	neutral
	286	ADAMTS6	11174	5q12.3	0.668	0.116	neutral
	287	ADAMTS7	11173	15q25.1	0	0	neutral
	288	ADAMTS8	11095	11q24.3	0	0	neutral
	289	ADAMTS9	56999	3p14.1	-0.401	0	neutral
	290	ADAMTS9-AS2	100507098	3p14.1	-0.401	0	neutral
	291	ADAMTSL1	92949	9p22.2	-0.101	0	neutral
	292	ADAMTSL2	9719	9q34.2	0.267	0.207	neutral
	293	ADAMTSL3	57188	15q25.2	0	0	neutral
	294	ADAMTSL4	54507	1q21.3	-0.169	0	neutral
	295	ADAMTSL5	339366	19p13.3	-0.149	-0.155	neutral
	296	ADAP1	11033	7p22.3	0	0	neutral
	297	ADAP2	55803	17q11.2	-0.405	0	neutral
	298	ADAR	103	1q21.3	-0.169	0	neutral
	299	ADARB1	104	21q22.3	0.157	-0.107	neutral
	300	ADARB2	105	10p15.3	0	0	neutral
	301	ADARB2-AS1	642394	10p15.3	0	0	neutral
	302	ADAT1	23536	16q23.1	0	0	neutral
	303	ADAT2	134637	6q24.2	0	0	neutral
	304	ADAT3	113179	19p13.3	-0.149	-0.155	neutral
	305	ADC	113451	1p35.1	0	0	neutral
	306	ADCK1	57143	14q24.3	0	0	neutral
	307	ADCK2	90956	7q34	-0.201	0	neutral
	308	ADCK3	56997	1q42.13	-0.209	0	neutral
	309	ADCK4	79934	19q13.2	0	0	neutral
	310	ADCK5	203054	8q24.3	-0.336	0	neutral
	311	ADCY1	107	7p12.3	0	0	neutral
	312	ADCY10	55811	1q24.2	0	0	neutral
	313	ADCY2	108	5p15.31	0	0	neutral
	314	ADCY3	109	2p23.3	-0.216	0	neutral
	315	ADCY4	196883	14q12	0	0.879	neutral
	316	ADCY5	111	3q21.1	-0.397	0	neutral
	317	ADCY6	112	12q13.12	0.414	0	neutral
	318	ADCY7	113	16q12.1	0	0.556	neutral
	319	ADCY8	114	8q24.22	0	-0.115	neutral
	320	ADCY9	115	16p13.3	0	0	neutral
	321	ADCYAP1	116	18p11.32	0	0	neutral
	322	ADCYAP1R1	117	7p14.3	0	0	neutral
	323	ADD1	118	4p16.3	-0.131	0	neutral
	324	ADD2	119	2p13.3	-0.213	0	neutral
	325	ADD3	120	10q25.1	0	0	neutral
	326	ADGB	79747	6q24.3	0	0	neutral
	327	ADH1A	124	4q23	0	-0.163	neutral
	328	ADH1B	125	4q23	0	-0.163	neutral
	329	ADH1C	126	4q23	0	-0.163	neutral
	330	ADH4	127	4q23	0	-0.163	neutral
	331	ADH5	128	4q23	0	-0.163	neutral
	332	ADH6	130	4q23	0	-0.163	neutral
	333	ADH7	131	4q23	0	-0.163	neutral
	334	ADHFE1	137872	8q13.1	-0.155	0	neutral
	335	ADI1	55256	2p25.3	-0.216	0.2	neutral
	336	ADIG	149685	20q11.23	0.124	-0.637	neutral
	337	ADIPOQ	9370	3q27.3	-0.114	0.482	neutral
	338	ADIPOR1	51094	1q32.1	-0.322	0	neutral
	339	ADIPOR2	79602	12p13.33	0	0	neutral
	340	ADK	132	10q22.2	-0.17	0	neutral
	341	ADM	133	11p15.4	0	0	neutral
	342	ADM2	79924	22q13.33	0	0	neutral
	343	ADNP	23394	20q13.13	0	0.797	neutral
	344	ADNP2	22850	18q23	0	0	neutral
	345	ADO	84890	10q21.3	-0.163	0	neutral
	346	ADORA1	134	1q32.1	0	0	neutral
	347	ADORA2A	135	22q11.23	-0.608	0	neutral
	348	ADORA2B	136	17p12	-0.405	0	neutral
	349	ADORA3	140	1p13.2	0	0	neutral
	350	ADPGK	83440	15q24.1	0	0	neutral
	351	ADPRH	141	3q13.33	-0.176	0	neutral
	352	ADPRHL1	113622	13q34	-0.114	0.662	neutral
	353	ADPRHL2	54936	1p34.3	-0.529	-0.1	neutral
	354	ADRA1A	148	8p21.2	-0.151	0	neutral
	355	ADRA1B	147	5q33.3	0	0	neutral
	356	ADRA1D	146	20p13	0.124	-0.637	neutral
	357	ADRA2A	150	10q25.2	0	0	neutral
	358	ADRA2B	151	2q11.1	0.129	0.231	neutral
	359	ADRA2C	152	4p16.3	-0.131	0	neutral
	360	ADRB1	153	10q25.3	0	0	neutral
	361	ADRB2	154	5q32	0	0	neutral
	362	ADRB3	155	8p11.23	-0.252	0	neutral
	363	ADRBK1	156	11q13.2	0	0	neutral
	364	ADRBK2	157	22q12.1	0	0	neutral
	365	ADRM1	11047	20q13.33	0.124	0	neutral
	366	ADSL	158	22q13.1	0	0	neutral
	367	ADSS	159	1q44	-0.331	0.404	neutral
	368	ADSSL1	122622	14q32.33	-0.169	0.165	neutral
	369	ADTRP	84830	6p24.1	0	0	neutral
	370	AEBP1	165	7p13	0	0	neutral
	371	AEBP2	121536	12p12.3	0	0	neutral
	372	AEN	64782	15q26.1	0	0	neutral
	373	AES	166	19p13.3	-0.149	-0.155	neutral
	374	AFAP1	60312	4p16.1	-0.131	0	neutral
	375	AFAP1-AS1	84740	4p16.1	-0.131	0	neutral
	376	AFAP1L1	134265	5q32	0	0	neutral
	377	AFAP1L2	84632	10q25.3	0	0	neutral
	378	AFF1	4299	4q21.3	0	-0.163	neutral
	379	AFF3	3899	2q11.2	0.129	0.231	neutral
	380	AFF4	27125	5q31.1	0.155	-0.153	neutral
	381	AFG3L1P	172	16q24.3	0.16	0	neutral
	382	AFG3L2	10939	18p11.21	-0.154	0	neutral
	383	AFM	173	4q13.3	0	-0.163	neutral
	384	AFMID	125061	17q25.3	0	0	neutral
	385	AFP	174	4q13.3	0	-0.163	neutral
	386	AFTPH	54812	2p14	-0.213	0	neutral
	387	AGA	175	4q34.3	-0.145	0.501	neutral
	388	AGAP1	116987	2q37.2	0	0	neutral
	389	AGAP11	119385	10q23.2	0.545	0	neutral
	390	AGAP2	116986	12q14.1	0	0	neutral
	391	AGAP3	116988	7q36.1	-0.186	0	neutral
	392	AGAP4	119016	10q11.22	0.144	0	neutral
	393	AGAP5	729092	10q22.2	-0.17	0	neutral
	394	AGAP6	414189	10q11.23	0.144	0	neutral
	395	AGAP7	653268	10q11.23	0.144	0	neutral
	396	AGAP8	728404	10q11.23	0.144	0	neutral
	397	AGAP9	642517	10q11.22	0.144	0	neutral
	398	AGBL1	123624	15q25.3	0	0	neutral
	399	AGBL2	79841	11p11.2	0	0	neutral
	400	AGBL3	340351	7q33	-0.201	0	neutral
	401	AGBL4	84871	1p33	0.208	0.451	neutral
	402	AGBL5	60509	2p23.3	-0.216	0	neutral
	403	AGER	177	6p21.32	0	0	neutral
	404	AGFG1	3267	2q36.3	-0.186	0	neutral
	405	AGFG2	3268	7q22.1	0	-0.124	neutral
	406	AGGF1	55109	5q13.3	0.265	0	neutral
	407	AGK	55750	7q34	-0.201	0	neutral
	408	AGL	178	1p21.2	0.294	0	neutral
	409	AGMAT	79814	1p36.21	0.367	0.162	neutral
	410	AGMO	392636	7p21.2	0	0	neutral
	411	AGPAT1	10554	6p21.32	0	0	neutral
	412	AGPAT2	10555	9q34.3	0	0	neutral
	413	AGPAT3	56894	21q22.3	0.157	-0.107	neutral
	414	AGPAT4	56895	6q26	0	0	neutral
	415	AGPAT4-IT1	79992	6q26	0	0	neutral
	416	AGPAT5	55326	8p23.1	0	0	neutral
	417	AGPAT6	137964	8p11.21	0	0	neutral
	418	AGPAT9	84803	4q21.23	0	-0.163	neutral
	419	AGPHD1	123688	15q25.1	0	0	neutral
	420	AGPS	8540	2q31.2	0	0	neutral
	421	AGR2	10551	7p21.1	0	0	neutral
	422	AGR3	155465	7p21.1	0	0	neutral
	423	AGRN	375790	1p36.33	-0.119	0	neutral
	424	AGRP	181	16q22.1	0	0.556	neutral
	425	AGSK1	80154	15q25.2	0	0	neutral
	426	AGT	183	1q42.2	-0.209	0	neutral
	427	AGTPBP1	23287	9q21.33	-0.144	-0.125	neutral
	428	AGTR1	185	3q24	-0.148	-0.173	neutral
	429	AGTRAP	57085	1p36.22	0.498	-0.146	neutral
	430	AGXT	189	2q37.3	0	0	neutral
	431	AGXT2	64902	5p13.2	0	0	neutral
	432	AGXT2L1	64850	4q25	-0.296	0.176	neutral
	433	AGXT2L2	85007	5q35.3	0	0	neutral
	434	AHCTF1	25909	1q44	-0.331	0.404	neutral
	435	AHCY	191	20q11.22	0.124	-0.637	neutral
	436	AHCYL1	10768	1p13.3	0	0	neutral
	437	AHCYL2	23382	7q32.1	-0.201	0	neutral
	438	AHDC1	27245	1p36.11	0.367	0.162	neutral
	439	AHI1	54806	6q23.3	0	0	neutral
	440	AHNAK	79026	11q12.3	0	0	neutral
	441	AHNAK2	113146	14q32.33	-0.169	0.165	neutral
	442	AHR	196	7p21.1	0	0	neutral
	443	AHRR	57491	5p15.33	-0.135	0	neutral
	444	AHSA1	10598	14q24.3	0	0	neutral
	445	AHSA2	130872	2p15	0	0	neutral
	446	AHSG	197	3q27.3	-0.114	0.482	neutral
	447	AHSP	51327	16p11.2	0	0.556	neutral
	448	AICDA	57379	12p13.31	0.124	-0.137	neutral
	449	AIDA	64853	1q41	-0.208	0	neutral
	450	AIF1	199	6p21.33	0	-0.496	neutral
	451	AIF1L	83543	9q34.12	0.267	0.207	neutral
	452	AIFM2	84883	10q22.1	-0.17	0	neutral
	453	AIFM3	150209	22q11.21	-0.148	0	neutral
	454	AIG1	51390	6q24.2	0	0	neutral
	455	AIM1	202	6q21	0	0	neutral
	456	AIM1L	55057	1p36.11	0.367	0.162	neutral
	457	AIM2	9447	1q23.1	0.231	0	neutral
	458	AIMP1	9255	4q24	-0.296	-0.163	neutral
	459	AIMP2	7965	7p22.1	0	0	neutral
	460	AIP	9049	11q13.2	0	0	neutral
	461	AIPL1	23746	17p13.2	0	0	neutral
	462	AIRE	326	21q22.3	0.157	-0.107	neutral
	463	AJAP1	55966	1p36.32	-0.119	0	neutral
	464	AJUBA	84962	14q11.2	0	0	neutral
	465	AK1	203	9q34.11	0.267	0.207	neutral
	466	AK2	204	1p35.1	0	0	neutral
	467	AK3	50808	9p24.1	0	0	neutral
	468	AK4	205	1p31.3	0.222	0	neutral
	469	AK5	26289	1p31.1	0	0	neutral
	470	AK7	122481	14q32.2	-0.169	0	neutral
	471	AK8	158067	9q34.13	0.267	0.207	neutral
	472	AKAP1	8165	17q22	-0.405	-0.33	loss
	473	AKAP10	11216	17p11.2	-0.405	0	neutral
	474	AKAP11	11215	13q14.11	0	0	neutral
	475	AKAP12	9590	6q25.1	0	0	neutral
	476	AKAP13	11214	15q25.3	0	0	neutral
	477	AKAP2	11217	9q31.3	0	0	neutral
	478	AKAP3	10566	12p13.32	0	0	neutral
	479	AKAP5	9495	14q23.3	0	0	neutral
	480	AKAP6	9472	14q12	0	0.879	neutral
	481	AKAP7	9465	6q23.2	-0.183	0	neutral
	482	AKAP8	10270	19p13.12	-0.149	-0.155	neutral
	483	AKAP8L	26993	19p13.12	-0.149	-0.155	neutral
	484	AKAP9	10142	7q21.2	0	-0.124	neutral
	485	AKD1	221264	6q21	0	0	neutral
	486	AKIP1	56672	11p15.4	0	0	neutral
	487	AKIRIN1	79647	1p34.3	0.208	0.451	neutral
	488	AKIRIN2	55122	6q15	0	0	neutral
	489	AKIRIN2-AS1	55389	6q15	0	0	neutral
	490	AKNA	80709	9q32	0.267	-0.105	neutral
	491	AKNAD1	254268	1p13.3	0	0	neutral
	492	AKR1A1	10327	1p34.1	0.208	0.451	neutral
	493	AKR1B1	231	7q33	-0.201	0	neutral
	494	AKR1B10	57016	7q33	-0.201	0	neutral
	495	AKR1B15	441282	7q33	-0.201	0	neutral
	496	AKR1C1	1645	10p15.1	0	0.327	neutral
	497	AKR1C2	1646	10p15.1	0	0.327	neutral
	498	AKR1C3	8644	10p15.1	0	0.327	neutral
	499	AKR1C4	1109	10p15.1	0	0.327	neutral
	500	AKR1CL1	340811	10p15.1	0	0.327	neutral
	501	AKR1D1	6718	7q33	-0.201	0	neutral
	502	AKR1E2	83592	10p15.1	0	0	neutral
	503	AKR7A2	8574	1p36.13	0.367	0.162	neutral
	504	AKR7A2P1	246182	1p13.2	0	0	neutral
	505	AKR7A3	22977	1p36.13	0.367	0.162	neutral
	506	AKR7L	246181	1p36.13	0.367	0.162	neutral
	507	AKT1	207	14q32.33	-0.169	0.165	neutral
	508	AKT1S1	84335	19q13.33	0	0	neutral
	509	AKT2	208	19q13.2	0	0	neutral
	510	AKT3	10000	1q43	-0.331	0.404	neutral
	511	AKTIP	64400	16q12.2	0	0.556	neutral
	512	ALAD	210	9q32	0.267	-0.105	neutral
	513	ALAS1	211	3p21.2	0	0.341	neutral
	514	ALB	213	4q13.3	0	-0.163	neutral
	515	ALCAM	214	3q13.11	-0.401	0	neutral
	516	ALDH16A1	126133	19q13.33	0	0	neutral
	517	ALDH18A1	5832	10q24.1	-0.148	0	neutral
	518	ALDH1A1	216	9q21.13	0	0.205	neutral
	519	ALDH1A2	8854	15q21.3	0	0	neutral
	520	ALDH1A3	220	15q26.3	0	0	neutral
	521	ALDH1B1	219	9p13.2	-0.308	0	neutral
	522	ALDH1L1	10840	3q21.3	0	0	neutral
	523	ALDH1L2	160428	12q23.3	0.12	-0.178	neutral
	524	ALDH2	217	12q24.12	0.12	-0.178	neutral
	525	ALDH3A1	218	17p11.2	-0.405	0	neutral
	526	ALDH3A2	224	17p11.2	-0.405	0	neutral
	527	ALDH3B1	221	11q13.2	-0.16	0	neutral
	528	ALDH3B2	222	11q13.2	0	0	neutral
	529	ALDH4A1	8659	1p36.13	0.367	0.162	neutral
	530	ALDH5A1	7915	6p22.3	0	-0.128	neutral
	531	ALDH6A1	4329	14q24.3	0.102	0	neutral
	532	ALDH7A1	501	5q23.2	0.155	-0.153	neutral
	533	ALDH8A1	64577	6q23.3	0	0	neutral
	534	ALDH9A1	223	1q24.1	0.103	0	neutral
	535	ALDOA	226	16p11.2	0	0.556	neutral
	536	ALDOB	229	9q31.1	-0.144	-0.125	neutral
	537	ALDOC	230	17q11.2	-0.405	0	neutral
	538	ALG1	56052	16p13.3	0	0	neutral
	539	ALG10	84920	12p11.1	0.414	0	neutral
	540	ALG10B	144245	12q12	0.414	0	neutral
	541	ALG11	440138	13q14.3	0	0	neutral
	542	ALG12	79087	22q13.33	0	0	neutral
	543	ALG14	199857	1p21.3	0.294	0	neutral
	544	ALG1L	200810	3q21.2	0	0	neutral
	545	ALG1L2	644974	3q22.1	-0.385	0	neutral
	546	ALG2	85365	9q22.33	-0.144	-0.125	neutral
	547	ALG3	10195	3q27.1	-0.114	0.482	neutral
	548	ALG5	29880	13q13.3	0.693	1.452	gain
	549	ALG6	29929	1p31.3	0.222	0	neutral
	550	ALG8	79053	11q14.1	0	-0.134	neutral
	551	ALG9	79796	11q23.1	0	0	neutral
	552	ALK	238	2p23.2	-0.216	0	neutral
	553	ALKBH1	8846	14q24.3	0	0	neutral
	554	ALKBH2	121642	12q24.11	0.12	-0.178	neutral
	555	ALKBH3	221120	11p11.2	0	0	neutral
	556	ALKBH4	54784	7q22.1	0	-0.124	neutral
	557	ALKBH5	54890	17p11.2	-0.405	0	neutral
	558	ALKBH6	84964	19q13.12	0	0	neutral
	559	ALKBH7	84266	19p13.3	-0.149	-0.155	neutral
	560	ALKBH8	91801	11q22.3	0	0	neutral
	561	ALLC	55821	2p25.3	-0.216	0.2	neutral
	562	ALMS1	7840	2p13.1	-0.213	0	neutral
	563	ALMS1P	200420	2p13.1	-0.213	0	neutral
	564	ALOX12	239	17p13.1	0	0	neutral
	565	ALOX12B	242	17p13.1	0	0	neutral
	566	ALOX12P2	245	17p13.1	0	0	neutral
	567	ALOX15	246	17p13.2	0	0	neutral
	568	ALOX15B	247	17p13.1	0	0	neutral
	569	ALOX15P1	342531	17p13.1	0	0	neutral
	570	ALOX5	240	10q11.21	-0.133	0	neutral
	571	ALOX5AP	241	13q12.3	0.693	1.452	gain
	572	ALOXE3	59344	17p13.1	0	0	neutral
	573	ALPI	248	2q37.1	-0.186	0	neutral
	574	ALPK1	80216	4q25	0	0.176	neutral
	575	ALPK2	115701	18q21.31	0	0	neutral
	576	ALPK3	57538	15q25.3	0	0	neutral
	577	ALPL	249	1p36.12	0.367	0.162	neutral
	578	ALPP	250	2q37.1	-0.186	0	neutral
	579	ALPPL2	251	2q37.1	-0.186	0	neutral
	580	ALS2	57679	2q33.1	-0.301	0.133	neutral
	581	ALS2CL	259173	3p21.31	-0.11	0	neutral
	582	ALS2CR11	151254	2q33.1	-0.301	0.133	neutral
	583	ALS2CR12	130540	2q33.1	-0.301	0.133	neutral
	584	ALS2CR8	79800	2q33.2	-0.301	0.133	neutral
	585	ALX1	8092	12q21.31	0.143	-0.172	neutral
	586	ALX3	257	1p13.3	0	0	neutral
	587	ALX4	60529	11p11.2	0	0	neutral
	588	ALYREF	10189	17q25.3	0	0	neutral
	589	AMACR	23600	5p13.2	0	0	neutral
	590	AMBN	258	4q13.3	0	-0.163	neutral
	591	AMBP	259	9q32	0.267	-0.105	neutral
	592	AMBRA1	55626	11p11.2	0	0	neutral
	593	AMD1	262	6q21	0	0	neutral
	594	AMDHD1	144193	12q23.1	0	0	neutral
	595	AMDHD2	51005	16p13.3	0	0	neutral
	596	AMFR	267	16q12.2	0	0.556	neutral
	597	AMH	268	19p13.3	-0.149	-0.155	neutral
	598	AMHR2	269	12q13.13	0.143	0	neutral
	599	AMICA1	120425	11q23.3	0	0	neutral
	600	AMIGO1	57463	1p13.3	0	0	neutral
	601	AMIGO2	347902	12q13.11	0.414	0	neutral
	602	AMIGO3	386724	3p21.31	0	0.341	neutral
	603	AMMECR1L	83607	2q14.3	0.142	0.351	neutral
	604	AMN	81693	14q32.32	-0.169	0	neutral
	605	AMN1	196394	12p11.21	0	0	neutral
	606	AMOTL1	154810	11q21	0	0	neutral
	607	AMOTL2	51421	3q22.2	-0.385	0	neutral
	608	AMPD1	270	1p13.2	0	0	neutral
	609	AMPD2	271	1p13.3	0	0	neutral
	610	AMPD3	272	11p15.4	0	0	neutral
	611	AMPH	273	7p14.1	0	0	neutral
	612	AMT	275	3p21.31	0	0.341	neutral
	613	AMTN	401138	4q13.3	0	-0.163	neutral
	614	AMY1A	276	1p21.1	-0.11	0	neutral
	615	AMY1B	277	1p21.1	-0.11	0	neutral
	616	AMY1C	278	1p21.1	-0.11	0	neutral
	617	AMY2A	279	1p21.1	-0.11	0	neutral
	618	AMY2B	280	1p21.1	-0.11	0	neutral
	619	AMZ1	155185	7p22.3	0	0	neutral
	620	AMZ2	51321	17q24.2	-0.176	-0.578	neutral
	621	AMZ2P1	201283	17q24.1	-0.176	-0.578	neutral
	622	ANAPC1	64682	2q13	-0.206	0.231	neutral
	623	ANAPC10	10393	4q31.21	0	-0.102	neutral
	624	ANAPC11	51529	17q25.3	0	0	neutral
	625	ANAPC13	25847	3q22.2	-0.385	0	neutral
	626	ANAPC16	119504	10q22.1	-0.17	0	neutral
	627	ANAPC2	29882	9q34.3	0	0	neutral
	628	ANAPC4	29945	4p15.2	0	0	neutral
	629	ANAPC5	51433	12q24.31	0.12	0	neutral
	630	ANAPC7	51434	12q24.11	0.12	-0.178	neutral
	631	ANG	283	14q11.2	-0.107	0	neutral
	632	ANGEL1	23357	14q24.3	0	0	neutral
	633	ANGEL2	90806	1q32.3	0.103	0.848	neutral
	634	ANGPT1	284	8q23.1	0	0	neutral
	635	ANGPT2	285	8p23.1	0	0	neutral
	636	ANGPT4	51378	20p13	-0.123	0	neutral
	637	ANGPTL1	9068	1q25.2	-0.442	0	neutral
	638	ANGPTL2	23452	9q33.3	0.267	0.207	neutral
	639	ANGPTL3	27329	1p31.3	0.222	0	neutral
	640	ANGPTL4	51129	19p13.2	-0.149	-0.155	neutral
	641	ANGPTL5	253935	11q22.1	0	-0.557	neutral
	642	ANGPTL6	83854	19p13.2	-0.149	-0.155	neutral
	643	ANGPTL7	10218	1p36.22	0.498	-0.146	neutral
	644	ANK1	286	8p11.21	0	0	neutral
	645	ANK2	287	4q25	-0.416	-0.229	neutral
	646	ANK3	288	10q21.2	-0.163	0	neutral
	647	ANKAR	150709	2q32.2	-0.128	0	neutral
	648	ANKDD1A	348094	15q22.31	0	0	neutral
	649	ANKFN1	162282	17q22	-0.405	-0.33	loss
	650	ANKFY1	51479	17p13.2	0	0	neutral
	651	ANKH	56172	5p15.2	-0.173	0	neutral
	652	ANKHD1	54882	5q31.3	0.155	-0.153	neutral
	653	ANKHD1-EIF4EBP3	404734	5q31.3	0.155	-0.153	neutral
	654	ANKIB1	54467	7q21.2	0	-0.124	neutral
	655	ANKK1	255239	11q23.2	0.271	-0.199	neutral
	656	ANKLE1	126549	19p13.11	0.287	0	neutral
	657	ANKLE2	23141	12q24.33	0	0	neutral
	658	ANKMY1	51281	2q37.3	0	0	neutral
	659	ANKMY2	57037	7p21.1	0	0	neutral
	660	ANKRA2	57763	5q13.2	0.668	0.116	neutral
	661	ANKRD1	27063	10q23.31	0.545	0	neutral
	662	ANKRD10	55608	13q34	-0.114	0.662	neutral
	663	ANKRD11	29123	16q24.3	0.16	0	neutral
	664	ANKRD12	23253	18p11.22	-0.154	0	neutral
	665	ANKRD13A	88455	12q24.11	0.12	-0.178	neutral
	666	ANKRD13B	124930	17q11.2	-0.405	0	neutral
	667	ANKRD13C	81573	1p31.1	0	0	neutral
	668	ANKRD13D	338692	11q13.2	0	0	neutral
	669	ANKRD16	54522	10p15.1	0	0.327	neutral
	670	ANKRD17	26057	4q13.3	0	-0.163	neutral
	671	ANKRD18A	253650	9p13.1	-0.308	0	neutral
	672	ANKRD18B	441459	9p13.3	-0.308	0	neutral
	673	ANKRD18DP	348840	3q29	-0.114	0	neutral
	674	ANKRD19P	138649	9q22.31	-0.144	-0.125	neutral
	675	ANKRD2	26287	10q24.2	-0.148	0	neutral
	676	ANKRD20A1	84210	9q13	-0.308	0	neutral
	677	ANKRD20A11P	391267	21q11.2	0	-0.532	neutral
	678	ANKRD20A2	441430	9p12	-0.308	0	neutral
	679	ANKRD20A3	441425	9p12	-0.308	0	neutral
	680	ANKRD20A4	728747	9q21.11	-0.308	0	neutral
	681	ANKRD20A5P	440482	18p11.21	-0.154	0	neutral
	682	ANKRD20A8P	729171	2q11.1	0.129	0.231	neutral
	683	ANKRD20A9P	284232	13q11	1.633	0.925	gain
	684	ANKRD22	118932	10q23.31	0.545	0	neutral
	685	ANKRD23	200539	2q11.2	0.129	0.231	neutral
	686	ANKRD24	170961	19p13.3	-0.149	-0.155	neutral
	687	ANKRD26	22852	10p12.1	-0.133	-0.462	neutral
	688	ANKRD26P1	124149	16q11.2	0	0.556	neutral
	689	ANKRD26P3	100101938	13q12.11	0.888	0.925	gain
	690	ANKRD27	84079	19q13.11	0	0	neutral
	691	ANKRD28	23243	3p25.1	0	0	neutral
	692	ANKRD29	147463	18q11.2	-0.154	0	neutral
	693	ANKRD30A	91074	10p11.21	-0.133	-0.462	neutral
	694	ANKRD30B	374860	18p11.21	-0.154	0	neutral
	695	ANKRD30BL	554226	2q21.2	-0.381	0	neutral
	696	ANKRD30BP2	149992	21q11.2	0	-0.532	neutral
	697	ANKRD31	256006	5q13.3	0.265	0	neutral
	698	ANKRD32	84250	5q15	0.265	0	neutral
	699	ANKRD33	341405	12q13.13	0.414	0	neutral
	700	ANKRD33B	651746	5p15.2	-0.168	0	neutral
	701	ANKRD34A	284615	1q21.1	0	-0.116	neutral
	702	ANKRD34B	340120	5q14.1	0.265	0	neutral
	703	ANKRD34C	390616	15q25.1	0	0	neutral
	704	ANKRD35	148741	1q21.1	0	0	neutral
	705	ANKRD36	375248	2q11.2	0.129	0.231	neutral
	706	ANKRD36B	57730	2q11.2	0.129	0.231	neutral
	707	ANKRD36BP1	84832	1q24.2	0	0	neutral
	708	ANKRD36BP2	645784	2p11.2	-0.213	0	neutral
	709	ANKRD37	353322	4q35.1	0	0	neutral
	710	ANKRD39	51239	2q11.2	0.129	0.231	neutral
	711	ANKRD40	91369	17q21.33	-0.405	0	neutral
	712	ANKRD42	338699	11q14.1	0	0	neutral
	713	ANKRD44	91526	2q33.1	-0.301	0.133	neutral
	714	ANKRD45	339416	1q25.1	0.925	0.217	neutral
	715	ANKRD46	157567	8q22.2	0	0	neutral
	716	ANKRD49	54851	11q21	0	0	neutral
	717	ANKRD5	63926	20p12.2	0.124	-0.637	neutral
	718	ANKRD50	57182	4q28.1	0	-0.102	neutral
	719	ANKRD52	283373	12q13.3	0	0.667	neutral
	720	ANKRD53	79998	2p13.3	-0.213	0	neutral
	721	ANKRD54	129138	22q13.1	0	0	neutral
	722	ANKRD55	79722	5q11.2	0.668	0.784	gain
	723	ANKRD6	22881	6q15	0	0	neutral
	724	ANKRD62P1-PARP4P3	23783	22q11.1	0	0	neutral
	725	ANKRD63	100131244	15q15.1	0	0	neutral
	726	ANKRD65	441869	1p36.33	-0.119	0	neutral
	727	ANKRD7	56311	7q31.31	-0.201	0	neutral
	728	ANKRD9	122416	14q32.31	-0.169	0	neutral
	729	ANKS1A	23294	6p21.31	0	-0.142	neutral
	730	ANKS1B	56899	12q23.1	0	0.179	neutral
	731	ANKS3	124401	16p13.3	0	0	neutral
	732	ANKS4B	257629	16p12.2	0	0.556	neutral
	733	ANKS6	203286	9q22.33	-0.144	-0.125	neutral
	734	ANKUB1	389161	3q25.1	-0.148	-0.173	neutral
	735	ANKZF1	55139	2q35	-0.186	0	neutral
	736	ANLN	54443	7p14.2	0	0	neutral
	737	ANO1	55107	11q13.3	-0.16	0	neutral
	738	ANO10	55129	3p22.1	0	-0.333	neutral
	739	ANO2	57101	12p13.31	0	0	neutral
	740	ANO3	63982	11p14.2	0.25	0	neutral
	741	ANO4	121601	12q23.1	0	0.179	neutral
	742	ANO5	203859	11p14.3	0.25	0	neutral
	743	ANO6	196527	12q12	0.414	0	neutral
	744	ANO7	50636	2q37.3	0	0	neutral
	745	ANO8	57719	19p13.11	0.287	0	neutral
	746	ANO9	338440	11p15.5	0	0	neutral
	747	ANP32A	8125	15q23	0	0	neutral
	748	ANP32A-IT1	80035	15q23	0	0	neutral
	749	ANP32AP1	723972	15q14	0	0	neutral
	750	ANP32B	10541	9q22.33	-0.144	-0.125	neutral
	751	ANP32C	23520	4q32.3	0	-0.292	neutral
	752	ANP32D	23519	12q13.11	0.414	0	neutral
	753	ANP32E	81611	1q21.2	-0.169	0	neutral
	754	ANPEP	290	15q26.1	0	0	neutral
	755	ANTXR1	84168	2p13.3	-0.213	0	neutral
	756	ANTXR2	118429	4q21.21	0	-0.163	neutral
	757	ANTXRL	195977	10q11.22	0.144	0	neutral
	758	ANXA1	301	9q21.13	0	0.205	neutral
	759	ANXA10	11199	4q32.3	0	0.501	neutral
	760	ANXA11	311	10q22.3	-0.17	0	neutral
	761	ANXA13	312	8q24.13	0	0	neutral
	762	ANXA2	302	15q22.2	-0.185	0	neutral
	763	ANXA2P1	303	4q31.3	0	0	neutral
	764	ANXA2P2	304	9p13.3	-0.308	0	neutral
	765	ANXA2P3	305	10q21.3	-0.276	-0.197	neutral
	766	ANXA3	306	4q21.21	0	-0.163	neutral
	767	ANXA4	307	2p13.3	-0.213	0	neutral
	768	ANXA5	308	4q27	0	0	neutral
	769	ANXA6	309	5q33.1	0	0	neutral
	770	ANXA7	310	10q22.2	-0.17	0	neutral
	771	ANXA8	653145	10q11.22	0.144	0	neutral
	772	ANXA8L1	728113	10q11.22	0.144	0	neutral
	773	ANXA8L2	244	10q11.22	0.144	0	neutral
	774	ANXA9	8416	1q21.3	-0.169	0	neutral
	775	AOAH	313	7p14.2	0	0	neutral
	776	AOC2	314	17q21.31	-0.405	0	neutral
	777	AOC3	8639	17q21.31	-0.405	0	neutral
	778	AOC4	90586	17q21.31	-0.405	0	neutral
	779	AOX1	316	2q33.1	-0.301	0.133	neutral
	780	AOX2P	344454	2q33.1	-0.301	0.133	neutral
	781	AP1AR	55435	4q25	0	0.176	neutral
	782	AP1B1	162	22q12.2	0	0	neutral
	783	AP1B1P1	23782	22q12.3	0	0	neutral
	784	AP1G1	164	16q22.2	0.156	0	neutral
	785	AP1G2	8906	14q11.2	0	0.879	neutral
	786	AP1M1	8907	19p13.11	0.287	0	neutral
	787	AP1M2	10053	19p13.2	-0.149	-0.155	neutral
	788	AP1S1	1174	7q22.1	0	-0.124	neutral
	789	AP1S3	130340	2q36.1	-0.186	0	neutral
	790	AP2A1	160	19q13.33	0	0	neutral
	791	AP2A2	161	11p15.5	0	0	neutral
	792	AP2B1	163	17q12	-0.405	0	neutral
	793	AP2M1	1173	3q27.1	-0.114	0.482	neutral
	794	AP2S1	1175	19q13.32	0	0	neutral
	795	AP3B1	8546	5q14.1	0.265	0	neutral
	796	AP3B2	8120	15q25.2	0	0	neutral
	797	AP3D1	8943	19p13.3	-0.149	-0.155	neutral
	798	AP3M1	26985	10q22.2	-0.17	0	neutral
	799	AP3M2	10947	8p11.21	0	0	neutral
	800	AP3S1	1176	5q22.3	0.155	-0.153	neutral
	801	AP3S2	10239	15q26.1	0	0	neutral
	802	AP4B1	10717	1p13.2	0	0	neutral
	803	AP4E1	23431	15q21.2	0	0	neutral
	804	AP4M1	9179	7q22.1	0	-0.124	neutral
	805	AP4S1	11154	14q12	0	0.879	neutral
	806	APAF1	317	12q23.1	0	0.179	neutral
	807	APBA1	320	9q21.11	-0.308	0	neutral
	808	APBA2	321	15q13.1	0	0	neutral
	809	APBA3	9546	19p13.3	-0.149	-0.155	neutral
	810	APBB1	322	11p15.4	0	0	neutral
	811	APBB1IP	54518	10p12.1	-0.133	-0.462	neutral
	812	APBB2	323	4p14	0	-0.163	neutral
	813	APBB3	10307	5q31.3	0.155	-0.153	neutral
	814	APC	324	5q22.2	0.155	-0.153	neutral
	815	APC2	10297	19p13.3	-0.149	-0.155	neutral
	816	APCDD1	147495	18p11.22	-0.154	0	neutral
	817	APCDD1L	164284	20q13.32	0	0.797	neutral
	818	APCS	325	1q23.2	0.231	0	neutral
	819	APEH	327	3p21.31	0	0.341	neutral
	820	APEX1	328	14q11.2	-0.107	0	neutral
	821	APH1A	51107	1q21.2	-0.169	0	neutral
	822	APH1B	83464	15q22.2	0	0.596	neutral
	823	API5	8539	11p12	0	0	neutral
	824	APIP	51074	11p13	0	0	neutral
	825	APITD1	378708	1p36.22	0.498	-0.146	neutral
	826	APITD1-CORT	100526739	1p36.22	0.498	-0.146	neutral
	827	APLF	200558	2p13.3	-0.213	0	neutral
	828	APLNR	187	11q12.1	0.113	0	neutral
	829	APLP1	333	19q13.12	0	0	neutral
	830	APLP2	334	11q24.3	-0.369	0	neutral
	831	APOA1	335	11q23.3	0.271	-0.199	neutral
	832	APOA1BP	128240	1q23.1	-0.169	0	neutral
	833	APOA2	336	1q23.3	0.231	0	neutral
	834	APOA4	337	11q23.3	0.271	-0.199	neutral
	835	APOA5	116519	11q23.3	0.271	-0.199	neutral
	836	APOB	338	2p24.1	-0.216	0	neutral
	837	APOBEC1	339	12p13.31	0	0	neutral
	838	APOBEC2	10930	6p21.1	0.143	0	neutral
	839	APOBEC3A	200315	22q13.1	0	0	neutral
	840	APOBEC3B	9582	22q13.1	0	0	neutral
	841	APOBEC3C	27350	22q13.1	0	0	neutral
	842	APOBEC3D	140564	22q13.1	0	0	neutral
	843	APOBEC3F	200316	22q13.1	0	0	neutral
	844	APOBEC3G	60489	22q13.1	0	0	neutral
	845	APOBEC3H	164668	22q13.1	0	0	neutral
	846	APOBEC4	403314	1q25.3	0	0	neutral
	847	APOBR	55911	16p11.2	0	0.556	neutral
	848	APOC1	341	19q13.32	0	0	neutral
	849	APOC1P1	342	19q13.32	0	0	neutral
	850	APOC2	344	19q13.32	0	0	neutral
	851	APOC3	345	11q23.3	0.271	-0.199	neutral
	852	APOC4	346	19q13.32	0	0	neutral
	853	APOC4-APOC2	100533990	19q13.32	0	0	neutral
	854	APOD	347	3q29	-0.114	0.482	neutral
	855	APOE	348	19q13.32	0	0	neutral
	856	APOF	319	12q13.3	0	0.667	neutral
	857	APOH	350	17q24.2	-0.176	-0.578	neutral
	858	APOL1	8542	22q12.3	0	0	neutral
	859	APOL2	23780	22q12.3	0	0	neutral
	860	APOL3	80833	22q12.3	0	0	neutral
	861	APOL4	80832	22q12.3	0	0	neutral
	862	APOL5	80831	22q12.3	0	0	neutral
	863	APOL6	80830	22q12.3	0	0	neutral
	864	APOLD1	81575	12p13.1	0.444	0	neutral
	865	APOM	55937	6p21.33	0	-0.496	neutral
	866	APOPT1	84334	14q32.33	-0.169	0.165	neutral
	867	APP	351	21q21.3	0.281	-0.367	neutral
	868	APPBP2	10513	17q23.2	-0.405	-0.33	loss
	869	APPL1	26060	3p14.3	-0.401	0	neutral
	870	APPL2	55198	12q23.3	0.12	-0.178	neutral
	871	APRT	353	16q24.3	0.16	0	neutral
	872	APTX	54840	9p21.1	-0.308	0	neutral
	873	AQP1	358	7p14.3	0	0	neutral
	874	AQP10	89872	1q21.3	-0.169	0	neutral
	875	AQP11	282679	11q14.1	0	0.136	neutral
	876	AQP12A	375318	2q37.3	0	0	neutral
	877	AQP12B	653437	2q37.3	0	0	neutral
	878	AQP2	359	12q13.12	0.414	0	neutral
	879	AQP3	360	9p13.3	-0.308	0	neutral
	880	AQP4	361	18q11.2	-0.307	0	neutral
	881	AQP5	362	12q13.12	0.414	0	neutral
	882	AQP6	363	12q13.12	0.414	0	neutral
	883	AQP7	364	9p13.3	-0.308	0	neutral
	884	AQP7P1	375719	9q13	-0.308	0	neutral
	885	AQP7P3	441432	9p12	-0.308	0	neutral
	886	AQP8	343	16p12.1	0	0.556	neutral
	887	AQP9	366	15q21.3	0	0	neutral
	888	AQPEP	206338	5q23.1	0.155	-0.153	neutral
	889	AQR	9716	15q14	0	0	neutral
	890	ARAP1	116985	11q13.4	0	0.136	neutral
	891	ARAP2	116984	4p14	-0.108	0	neutral
	892	ARAP3	64411	5q31.3	0	0	neutral
	893	ARC	23237	8q24.3	0	0	neutral
	894	ARCN1	372	11q23.3	0	0	neutral
	895	AREG	374	4q13.3	0	-0.163	neutral
	896	ARF1	375	1q42.13	-0.209	0	neutral
	897	ARF3	377	12q13.12	0.414	0	neutral
	898	ARF4	378	3p14.3	-0.401	0	neutral
	899	ARF5	381	7q32.1	-0.201	0	neutral
	900	ARF6	382	14q21.3	0	0.879	neutral
	901	ARFGAP1	55738	20q13.33	0.124	0	neutral
	902	ARFGAP2	84364	11p11.2	0	0	neutral
	903	ARFGAP3	26286	22q13.2	0	0	neutral
	904	ARFGEF1	10565	8q13.2	-0.133	0	neutral
	905	ARFGEF2	10564	20q13.13	0.124	-0.637	neutral
	906	ARFIP1	27236	4q31.3	0	0	neutral
	907	ARFIP2	23647	11p15.4	0	0	neutral
	908	ARFRP1	10139	20q13.33	0.124	0	neutral
	909	ARG1	383	6q23.2	0	0	neutral
	910	ARG2	384	14q24.1	0	0	neutral
	911	ARGFX	503582	3q13.33	-0.397	0	neutral
	912	ARGFXP2	503640	17q11.2	-0.405	0	neutral
	913	ARGLU1	55082	13q33.3	-0.114	0	neutral
	914	ARHGAP1	392	11p11.2	0	0	neutral
	915	ARHGAP10	79658	4q31.23	0	-0.102	neutral
	916	ARHGAP11A	9824	15q13.3	0	0	neutral
	917	ARHGAP11B	89839	15q13.2	0	0	neutral
	918	ARHGAP12	94134	10p11.22	-0.133	-0.462	neutral
	919	ARHGAP15	55843	2q22.2	0	0	neutral
	920	ARHGAP17	55114	16p12.1	0	0.556	neutral
	921	ARHGAP18	93663	6q22.33	-0.114	0	neutral
	922	ARHGAP19	84986	10q24.1	-0.148	0	neutral
	923	ARHGAP19-SLIT1	100533184	10q24.1	-0.148	0	neutral
	924	ARHGAP20	57569	11q23.1	0	0.265	neutral
	925	ARHGAP21	57584	10p12.1	-0.133	-0.462	neutral
	926	ARHGAP22	58504	10q11.22	0.144	0	neutral
	927	ARHGAP23	57636	17q12	-0.405	0	neutral
	928	ARHGAP24	83478	4q21.23	0	-0.163	neutral
	929	ARHGAP25	9938	2p13.3	-0.213	0	neutral
	930	ARHGAP26	23092	5q31.3	0	0	neutral
	931	ARHGAP27	201176	17q21.31	-0.405	0	neutral
	932	ARHGAP28	79822	18p11.31	0	0	neutral
	933	ARHGAP29	9411	1p22.1	0.103	0	neutral
	934	ARHGAP30	257106	1q23.3	0.231	0	neutral
	935	ARHGAP31	57514	3q13.33	-0.176	0	neutral
	936	ARHGAP32	9743	11q24.3	-0.369	0	neutral
	937	ARHGAP33	115703	19q13.12	0	0	neutral
	938	ARHGAP35	2909	19q13.32	0	0	neutral
	939	ARHGAP39	80728	8q24.3	-0.336	0	neutral
	940	ARHGAP40	343578	20q11.23	0.124	-0.637	neutral
	941	ARHGAP42	143872	11q22.1	0	-0.557	neutral
	942	ARHGAP44	9912	17p12	-0.19	0	neutral
	943	ARHGAP5	394	14q12	0	0.879	neutral
	944	ARHGAP5-AS1	84837	14q12	0	0.879	neutral
	945	ARHGAP8	23779	22q13.31	0	0	neutral
	946	ARHGAP9	64333	12q13.3	0	0	neutral
	947	ARHGDIA	396	17q25.3	0	0	neutral
	948	ARHGDIB	397	12p12.3	0	0	neutral
	949	ARHGDIG	398	16p13.3	0	0	neutral
	950	ARHGEF1	9138	19q13.2	0	0	neutral
	951	ARHGEF10	9639	8p23.3	0	0	neutral
	952	ARHGEF10L	55160	1p36.13	0.367	0.162	neutral
	953	ARHGEF11	9826	1q23.1	-0.169	0	neutral
	954	ARHGEF12	23365	11q23.3	0	0	neutral
	955	ARHGEF15	22899	17p13.1	0	0	neutral
	956	ARHGEF16	27237	1p36.32	-0.119	0	neutral
	957	ARHGEF17	9828	11q13.4	0	0.136	neutral
	958	ARHGEF18	23370	19p13.2	-0.149	-0.155	neutral
	959	ARHGEF19	128272	1p36.13	0.367	0.162	neutral
	960	ARHGEF2	9181	1q22	-0.169	0	neutral
	961	ARHGEF25	115557	12q13.3	0	0	neutral
	962	ARHGEF26	26084	3q25.2	-0.148	-0.173	neutral
	963	ARHGEF26-AS1	100507524	3q25.2	-0.148	-0.173	neutral
	964	ARHGEF3	50650	3p14.3	-0.401	0	neutral
	965	ARHGEF33	100271715	2p22.1	0.169	-0.272	neutral
	966	ARHGEF35	445328	7q35	0	-0.266	neutral
	967	ARHGEF37	389337	5q32	0	0	neutral
	968	ARHGEF38	54848	4q24	-0.296	-0.163	neutral
	969	ARHGEF4	50649	2q21.1	0	0	neutral
	970	ARHGEF40	55701	14q11.2	-0.107	0	neutral
	971	ARHGEF5	7984	7q35	0	-0.266	neutral
	972	ARHGEF7	8874	13q34	-0.114	0.662	neutral
	973	ARID1A	8289	1p36.11	0.367	0.162	neutral
	974	ARID1B	57492	6q25.3	0	0	neutral
	975	ARID2	196528	12q12	0.414	0	neutral
	976	ARID3A	1820	19p13.3	-0.149	-0.155	neutral
	977	ARID3B	10620	15q24.1	0	0	neutral
	978	ARID3C	138715	9p13.3	-0.308	0	neutral
	979	ARID4A	5926	14q23.1	0	0	neutral
	980	ARID4B	51742	1q42.3	-0.331	0.404	neutral
	981	ARID5A	10865	2q11.2	0.129	0.231	neutral
	982	ARID5B	84159	10q21.2	-0.163	0	neutral
	983	ARIH1	25820	15q24.1	0	0	neutral
	984	ARIH2	10425	3p21.31	-0.11	0	neutral
	985	ARL1	400	12q23.2	0	0.179	neutral
	986	ARL10	285598	5q35.2	0	0	neutral
	987	ARL11	115761	13q14.2	0	0	neutral
	988	ARL13B	200894	3q11.1	-0.401	0	neutral
	989	ARL14	80117	3q25.33	-0.148	-0.173	neutral
	990	ARL15	54622	5q11.2	-0.124	0.451	neutral
	991	ARL16	339231	17q25.3	0	0	neutral
	992	ARL17A	51326	17q21.31	-0.405	0	neutral
	993	ARL17B	100506084	17q21.31	-0.405	0	neutral
	994	ARL2	402	11q13.1	0	0	neutral
	995	ARL2BP	23568	16q13	0	0.556	neutral
	996	ARL2-SNX15	100528018	11q13.1	0	0	neutral
	997	ARL3	403	10q24.32	0	0	neutral
	998	ARL4A	10124	7p21.3	0	0	neutral
	999	ARL4C	10123	2q37.1	0	0	neutral
	1000	ARL4D	379	17q21.31	-0.405	0	neutral
	1001	ARL5A	26225	2q23.3	0	0	neutral
	1002	ARL5B	221079	10p12.31	0	0	neutral
	1003	ARL5C	390790	17q12	-0.405	0	neutral
	1004	ARL6	84100	3q11.2	-0.401	0	neutral
	1005	ARL6IP1	23204	16p12.3	0	0.556	neutral
	1006	ARL6IP4	51329	12q24.31	0.12	0	neutral
	1007	ARL6IP5	10550	3p14.1	-0.401	0	neutral
	1008	ARL6IP6	151188	2q23.3	0	0	neutral
	1009	ARL8A	127829	1q32.1	-0.322	0	neutral
	1010	ARL8B	55207	3p26.1	0	0	neutral
	1011	ARL9	132946	4q12	0	-0.163	neutral
	1012	ARMC1	55156	8q13.1	-0.155	0	neutral
	1013	ARMC10	83787	7q22.1	0	-0.124	neutral
	1014	ARMC12	221481	6p21.31	0	-0.142	neutral
	1015	ARMC2	84071	6q21	0	0	neutral
	1016	ARMC3	219681	10p12.2	-0.133	-0.462	neutral
	1017	ARMC4	55130	10p12.1	-0.133	-0.462	neutral
	1018	ARMC5	79798	16p11.2	0	0.556	neutral
	1019	ARMC6	93436	19p13.11	0.287	0	neutral
	1020	ARMC7	79637	17q25.1	0	0	neutral
	1021	ARMC8	25852	3q22.3	-0.134	0	neutral
	1022	ARMC9	80210	2q37.1	-0.186	0	neutral
	1023	ARMS2	387715	10q26.13	0	0.981	neutral
	1024	ARNT	405	1q21.3	-0.169	0	neutral
	1025	ARNT2	9915	15q25.1	0	0	neutral
	1026	ARNTL	406	11p15.2	0.147	0	neutral
	1027	ARNTL2	56938	12p11.23	-0.126	0	neutral
	1028	ARPC1A	10552	7q22.1	0	-0.124	neutral
	1029	ARPC1B	10095	7q22.1	0	-0.124	neutral
	1030	ARPC2	10109	2q35	-0.186	0	neutral
	1031	ARPC3	10094	12q24.11	0.12	-0.178	neutral
	1032	ARPC4	10093	3p25.3	0	0	neutral
	1033	ARPC4-TTLL3	100526693	3p25.3	0	0	neutral
	1034	ARPC5	10092	1q25.3	0	0	neutral
	1035	ARPC5L	81873	9q33.3	0.267	0.207	neutral
	1036	ARPM1	84517	3q26.2	-0.148	0	neutral
	1037	ARPP19	10776	15q21.2	0	0	neutral
	1038	ARPP21	10777	3p22.3	0	0	neutral
	1039	ARRB1	408	11q13.4	0	0.136	neutral
	1040	ARRB2	409	17p13.2	0	0	neutral
	1041	ARRDC1	92714	9q34.3	-0.187	0.453	neutral
	1042	ARRDC2	27106	19p13.11	0.287	0	neutral
	1043	ARRDC3	57561	5q14.3	0.265	0	neutral
	1044	ARRDC4	91947	15q26.3	0	0	neutral
	1045	ARRDC5	645432	19p13.3	-0.149	-0.155	neutral
	1046	ARSA	410	22q13.33	0	0	neutral
	1047	ARSB	411	5q14.1	0.265	0	neutral
	1048	ARSG	22901	17q24.2	-0.176	-0.578	neutral
	1049	ARSI	340075	5q32	0.386	0	neutral
	1050	ARSJ	79642	4q26	0	0	neutral
	1051	ARSK	153642	5q15	0.265	0	neutral
	1052	ART1	417	11p15.4	0	0	neutral
	1053	ART3	419	4q21.1	0	-0.163	neutral
	1054	ART4	420	12p12.3	0	0	neutral
	1055	ART5	116969	11p15.4	0	0	neutral
	1056	ARTN	9048	1p34.1	0.208	0.451	neutral
	1057	ARV1	64801	1q42.2	-0.209	0	neutral
	1058	ARVCF	421	22q11.21	-0.148	0.367	neutral
	1059	AS3MT	57412	10q24.32	0	0	neutral
	1060	ASAH1	427	8p22	0	0	neutral
	1061	ASAH2	56624	10q11.23	0.144	0	neutral
	1062	ASAH2B	653308	10q11.23	0.144	0	neutral
	1063	ASAP1	50807	8q24.21	0	-0.115	neutral
	1064	ASAP1-IT1	29065	8q24.21	0	-0.115	neutral
	1065	ASAP2	8853	2p25.1	-0.216	0	neutral
	1066	ASAP3	55616	1p36.12	0.367	0.162	neutral
	1067	ASB1	51665	2q37.3	0	0	neutral
	1068	ASB10	136371	7q36.1	-0.186	0	neutral
	1069	ASB13	79754	10p15.1	0	0.327	neutral
	1070	ASB14	142686	3p14.3	-0.401	0	neutral
	1071	ASB15	142685	7q31.32	-0.201	0	neutral
	1072	ASB16	92591	17q21.31	-0.405	0	neutral
	1073	ASB17	127247	1p31.1	0	0	neutral
	1074	ASB18	401036	2q37.2	0	0	neutral
	1075	ASB2	51676	14q32.12	-0.169	0	neutral
	1076	ASB3	51130	2p16.2	0	0.118	neutral
	1077	ASB4	51666	7q21.3	0	-0.124	neutral
	1078	ASB5	140458	4q34.2	-0.145	0.501	neutral
	1079	ASB6	140459	9q34.11	0.267	0.207	neutral
	1080	ASB7	140460	15q26.3	0	0	neutral
	1081	ASB8	140461	12q13.11	0.414	0	neutral
	1082	ASB9P1	728619	15q26.1	0	0	neutral
	1083	ASCC1	51008	10q22.1	-0.17	0	neutral
	1084	ASCC2	84164	22q12.2	0	0	neutral
	1085	ASCC3	10973	6q16.3	0	0	neutral
	1086	ASCL1	429	12q23.2	0	0.627	neutral
	1087	ASCL2	430	11p15.5	0	0	neutral
	1088	ASCL3	56676	11p15.4	0	0	neutral
	1089	ASCL4	121549	12q23.3	0.12	-0.178	neutral
	1090	ASF1A	25842	6q22.31	0	-0.652	neutral
	1091	ASF1B	55723	19p13.12	-0.149	-0.155	neutral
	1092	ASGR1	432	17p13.1	0	0	neutral
	1093	ASGR2	433	17p13.1	0	0	neutral
	1094	ASH1L	55870	1q22	-0.169	0	neutral
	1095	ASH2L	9070	8p11.23	-0.117	0	neutral
	1096	ASIP	434	20q11.22	0.124	-0.637	neutral
	1097	ASL	435	7q11.21	0	-0.124	neutral
	1098	ASNA1	439	19p13.2	-0.149	-0.155	neutral
	1099	ASNS	440	7q21.3	0	-0.124	neutral
	1100	ASNSD1	54529	2q32.2	-0.128	0	neutral
	1101	ASPA	443	17p13.2	0	0	neutral
	1102	ASPDH	554235	19q13.33	0	0	neutral
	1103	ASPG	374569	14q32.33	-0.169	0.165	neutral
	1104	ASPH	444	8q12.3	-0.204	0	neutral
	1105	ASPHD1	253982	16p11.2	0	0.556	neutral
	1106	ASPHD2	57168	22q12.1	0	0	neutral
	1107	ASPM	259266	1q31.3	0	0	neutral
	1108	ASPN	54829	9q22.31	-0.144	-0.125	neutral
	1109	ASPRV1	151516	2p13.3	-0.213	0	neutral
	1110	ASPSCR1	79058	17q25.3	0	0	neutral
	1111	ASRGL1	80150	11q12.3	0	0	neutral
	1112	ASS1	445	9q34.11	0.267	0.207	neutral
	1113	ASTE1	28990	3q22.1	-0.385	0	neutral
	1114	ASTL	431705	2q11.1	0.129	0.231	neutral
	1115	ASTN1	460	1q25.2	0.925	0	neutral
	1116	ASTN2	23245	9q33.1	0.267	-0.105	neutral
	1117	ASUN	55726	12p11.23	-0.126	0	neutral
	1118	ASXL1	171023	20q11.21	0.124	-0.637	neutral
	1119	ASXL2	55252	2p23.3	-0.216	0	neutral
	1120	ASXL3	80816	18q12.1	0	0	neutral
	1121	ASZ1	136991	7q31.2	0	0.356	neutral
	1122	ATAD1	84896	10q23.31	0.545	0	neutral
	1123	ATAD2	29028	8q24.13	0	0	neutral
	1124	ATAD2B	54454	2p24.1	-0.216	0	neutral
	1125	ATAD3A	55210	1p36.33	-0.119	0	neutral
	1126	ATAD3B	83858	1p36.33	-0.119	0	neutral
	1127	ATAD3C	219293	1p36.33	-0.119	0	neutral
	1128	ATAD5	79915	17q11.2	-0.405	0	neutral
	1129	ATAT1	79969	6p21.33	0	0	neutral
	1130	ATCAY	85300	19p13.3	-0.149	-0.155	neutral
	1131	ATE1	11101	10q26.13	0	0.981	neutral
	1132	ATF1	466	12q13.12	0.414	0	neutral
	1133	ATF2	1386	2q31.1	0	0	neutral
	1134	ATF3	467	1q32.3	0.103	0.848	neutral
	1135	ATF4	468	22q13.1	0	0	neutral
	1136	ATF5	22809	19q13.33	0	0	neutral
	1137	ATF6	22926	1q23.3	0.103	0	neutral
	1138	ATF6B	1388	6p21.33	0	0	neutral
	1139	ATF7	11016	12q13.13	0.143	0	neutral
	1140	ATF7IP	55729	12p13.1	0	0	neutral
	1141	ATF7IP2	80063	16p13.2	0	0	neutral
	1142	ATG10	83734	5q14.1	0.265	0	neutral
	1143	ATG12	9140	5q22.3	0.155	-0.153	neutral
	1144	ATG13	9776	11p11.2	0	0	neutral
	1145	ATG14	22863	14q22.3	0	0	neutral
	1146	ATG16L1	55054	2q37.1	-0.186	0	neutral
	1147	ATG16L2	89849	11q13.4	0	0.136	neutral
	1148	ATG2A	23130	11q13.1	0	0	neutral
	1149	ATG2B	55102	14q32.2	-0.169	0	neutral
	1150	ATG3	64422	3q13.2	-0.176	0	neutral
	1151	ATG4B	23192	2q37.3	0	0	neutral
	1152	ATG4C	84938	1p31.3	0.222	0	neutral
	1153	ATG4D	84971	19p13.2	-0.149	-0.155	neutral
	1154	ATG5	9474	6q21	0	0	neutral
	1155	ATG7	10533	3p25.3	0	0	neutral
	1156	ATG9A	79065	2q35	-0.186	0	neutral
	1157	ATG9B	285973	7q36.1	-0.186	0	neutral
	1158	ATHL1	80162	11p15.5	0	0	neutral
	1159	ATIC	471	2q35	-0.186	0	neutral
	1160	ATL1	51062	14q22.1	0	0	neutral
	1161	ATL2	64225	2p22.2	0.169	-0.272	neutral
	1162	ATL3	25923	11q12.3	0	0	neutral
	1163	ATM	472	11q22.3	0	0.265	neutral
	1164	ATMIN	23300	16q23.2	0.16	0	neutral
	1165	ATN1	1822	12p13.31	0	0	neutral
	1166	ATOH1	474	4q22.2	0	-0.163	neutral
	1167	ATOH7	220202	10q21.3	0	0.174	neutral
	1168	ATOH8	84913	2p11.2	-0.213	0	neutral
	1169	ATOX1	475	5q33.1	0	0	neutral
	1170	ATP10A	57194	15q12	0	0	neutral
	1171	ATP10B	23120	5q34	0	0	neutral
	1172	ATP10D	57205	4p12	0	-0.163	neutral
	1173	ATP11A	23250	13q34	-0.114	0.662	neutral
	1174	ATP11B	23200	3q26.33	-0.114	0.482	neutral
	1175	ATP12A	479	13q12.12	0.489	1.452	gain
	1176	ATP13A1	57130	19p13.11	0.287	0	neutral
	1177	ATP13A2	23400	1p36.13	0.367	0.162	neutral
	1178	ATP13A3	79572	3q29	-0.114	0.482	neutral
	1179	ATP13A4	84239	3q29	-0.114	0.482	neutral
	1180	ATP13A5	344905	3q29	-0.114	0.482	neutral
	1181	ATP1A1	476	1p13.1	-0.825	0	neutral
	1182	ATP1A1OS	84852	1p13.1	-0.825	0	neutral
	1183	ATP1A2	477	1q23.2	0.231	0	neutral
	1184	ATP1A3	478	19q13.2	0	0	neutral
	1185	ATP1A4	480	1q23.2	0.231	0	neutral
	1186	ATP1B1	481	1q24.2	-0.151	0	neutral
	1187	ATP1B2	482	17p13.1	0	0	neutral
	1188	ATP1B3	483	3q23	-0.148	-0.173	neutral
	1189	ATP2A1	487	16p11.2	0	0.556	neutral
	1190	ATP2A2	488	12q24.11	0.12	-0.178	neutral
	1191	ATP2A3	489	17p13.2	0	0	neutral
	1192	ATP2B1	490	12q21.33	0	-0.172	neutral
	1193	ATP2B2	491	3p25.3	0	0	neutral
	1194	ATP2B4	493	1q32.1	0	0	neutral
	1195	ATP2C1	27032	3q22.1	-0.385	0	neutral
	1196	ATP2C2	9914	16q24.1	0.16	0	neutral
	1197	ATP4A	495	19q13.12	-0.115	0	neutral
	1198	ATP4B	496	13q34	-0.114	0.662	neutral
	1199	ATP5A1	498	18q21.1	-0.112	0	neutral
	1200	ATP5B	506	12q13.3	0	0.667	neutral
	1201	ATP5C1	509	10p14	0	0.327	neutral
	1202	ATP5D	513	19p13.3	-0.149	-0.155	neutral
	1203	ATP5E	514	20q13.32	0	0	neutral
	1204	ATP5EP2	432369	13q12.2	1.209	1.452	gain
	1205	ATP5F1	515	1p13.2	0	0	neutral
	1206	ATP5G1	516	17q21.32	-0.405	0	neutral
	1207	ATP5G2	517	12q13.13	0.143	0	neutral
	1208	ATP5G3	518	2q31.1	0	0	neutral
	1209	ATP5H	10476	17q25.1	0	0	neutral
	1210	ATP5I	521	4p16.3	-0.131	0	neutral
	1211	ATP5J	522	21q21.3	0	0	neutral
	1212	ATP5J2	9551	7q22.1	0	-0.124	neutral
	1213	ATP5J2-PTCD1	100526740	7q22.1	0	-0.124	neutral
	1214	ATP5L	10632	11q23.3	0	0	neutral
	1215	ATP5L2	267020	22q13.2	0	0	neutral
	1216	ATP5O	539	21q22.11	0.157	-0.107	neutral
	1217	ATP5S	27109	14q21.3	0	0	neutral
	1218	ATP5SL	55101	19q13.2	0	0	neutral
	1219	ATP6AP1L	92270	5q14.2	0.265	0	neutral
	1220	ATP6V0A1	535	17q21.2	-0.405	0	neutral
	1221	ATP6V0A2	23545	12q24.31	0.12	0	neutral
	1222	ATP6V0A4	50617	7q34	-0.201	0	neutral
	1223	ATP6V0B	533	1p34.1	0.208	0.451	neutral
	1224	ATP6V0C	527	16p13.3	0	0	neutral
	1225	ATP6V0CP3	442211	6p21.1	0	0	neutral
	1226	ATP6V0D1	9114	16q22.1	0	0.556	neutral
	1227	ATP6V0D2	245972	8q21.3	0	0	neutral
	1228	ATP6V0E1	8992	5q35.1	0	0	neutral
	1229	ATP6V0E2	155066	7q36.1	-0.186	0	neutral
	1230	ATP6V1A	523	3q13.2	-0.176	0	neutral
	1231	ATP6V1B1	525	2p13.3	-0.213	0	neutral
	1232	ATP6V1B2	526	8p21.3	0	0	neutral
	1233	ATP6V1C1	528	8q22.3	0	0	neutral
	1234	ATP6V1C2	245973	2p25.1	-0.216	0	neutral
	1235	ATP6V1D	51382	14q23.3	0	0	neutral
	1236	ATP6V1E1	529	22q11.21	-0.148	0.367	neutral
	1237	ATP6V1E2	90423	2p21	-0.132	0.118	neutral
	1238	ATP6V1F	9296	7q32.1	-0.201	0	neutral
	1239	ATP6V1G1	9550	9q32	0.267	-0.105	neutral
	1240	ATP6V1G2	534	6p21.33	0	-0.496	neutral
	1241	ATP6V1G2-DDX39B	100532737	6p21.33	0	-0.496	neutral
	1242	ATP6V1G3	127124	1q31.3	-0.21	0	neutral
	1243	ATP6V1H	51606	8q11.23	0.284	0	neutral
	1244	ATP7B	540	13q14.3	0	0	neutral
	1245	ATP8A1	10396	4p13	0	-0.163	neutral
	1246	ATP8A2	51761	13q12.13	0.64	1.452	gain
	1247	ATP8B1	5205	18q21.31	0	0	neutral
	1248	ATP8B2	57198	1q21.3	-0.169	0	neutral
	1249	ATP8B3	148229	19p13.3	-0.149	-0.155	neutral
	1250	ATP8B4	79895	15q21.2	0	0	neutral
	1251	ATP8B5P	158381	9p13.3	-0.308	0	neutral
	1252	ATP9A	10079	20q13.2	0	0.797	neutral
	1253	ATP9B	374868	18q23	0	0	neutral
	1254	ATPAF1	64756	1p33	0.208	0.451	neutral
	1255	ATPAF1-AS1	374973	1p33	0.208	0.451	neutral
	1256	ATPAF2	91647	17p11.2	-0.405	0	neutral
	1257	ATPBD4	89978	15q14	0	0	neutral
	1258	ATPIF1	93974	1p35.3	0.367	0.162	neutral
	1259	ATR	545	3q23	-0.148	-0.173	neutral
	1260	ATRIP	84126	3p21.31	-0.11	0	neutral
	1261	ATRN	8455	20p13	0.124	-0.637	neutral
	1262	ATRNL1	26033	10q25.3	0	0	neutral
	1263	ATXN1	6310	6p22.3	0	0	neutral
	1264	ATXN10	25814	22q13.31	0	0	neutral
	1265	ATXN1L	342371	16q22.2	0	0	neutral
	1266	ATXN2	6311	12q24.12	0.12	-0.178	neutral
	1267	ATXN2L	11273	16p11.2	0	0.556	neutral
	1268	ATXN3	4287	14q32.12	-0.169	0	neutral
	1269	ATXN7	6314	3p14.1	-0.401	0	neutral
	1270	ATXN7L1	222255	7q22.3	-0.129	-0.124	neutral
	1271	ATXN7L2	127002	1p13.3	0	0	neutral
	1272	ATXN7L3	56970	17q21.31	-0.405	0	neutral
	1273	ATXN7L3B	552889	12q21.1	-0.185	-0.32	neutral
	1274	ATXN8OS	6315	13q21.33	0	0	neutral
	1275	AUH	549	9q22.31	-0.144	-0.125	neutral
	1276	AUP1	550	2p13.1	-0.213	0	neutral
	1277	AURKA	6790	20q13.2	0	0.797	neutral
	1278	AURKAIP1	54998	1p36.33	-0.119	0	neutral
	1279	AURKAPS1	6791	1q41	0	0	neutral
	1280	AURKB	9212	17p13.1	0	0	neutral
	1281	AURKC	6795	19q13.43	0.124	0	neutral
	1282	AUTS2	26053	7q11.22	0	-0.124	neutral
	1283	AVEN	57099	15q14	0	0	neutral
	1284	AVIL	10677	12q14.1	0	0	neutral
	1285	AVL9	23080	7p14.3	0	0	neutral
	1286	AVP	551	20p13	0.124	-0.637	neutral
	1287	AVPI1	60370	10q24.2	-0.148	0	neutral
	1288	AVPR1A	552	12q14.2	0.113	0	neutral
	1289	AVPR1B	553	1q32.1	0.103	0	neutral
	1290	AXDND1	126859	1q25.2	-0.442	0	neutral
	1291	AXIN1	8312	16p13.3	0	0	neutral
	1292	AXIN2	8313	17q24.1	-0.176	-0.578	neutral
	1293	AXL	558	19q13.2	0	0	neutral
	1294	AZGP1	563	7q22.1	0	-0.124	neutral
	1295	AZGP1P1	646282	7q22.1	0	-0.124	neutral
	1296	AZI1	22994	17q25.3	0	0	neutral
	1297	AZI2	64343	3p24.1	0	0	neutral
	1298	AZIN1	51582	8q22.3	0	0	neutral
	1299	AZU1	566	19p13.3	-0.149	-0.155	neutral
	1300	B2M	567	15q21.1	0	0	neutral
	1301	B3GALNT1	8706	3q26.1	-0.148	-0.173	neutral
	1302	B3GALNT2	148789	1q42.3	-0.331	0.404	neutral
	1303	B3GALT1	8708	2q24.3	0	0	neutral
	1304	B3GALT2	8707	1q31.2	0	0	neutral
	1305	B3GALT4	8705	6p21.32	0.104	0	neutral
	1306	B3GALT5	10317	21q22.2	0.157	-0.107	neutral
	1307	B3GALT6	126792	1p36.33	-0.119	0	neutral
	1308	B3GALTL	145173	13q12.3	0.693	1.452	gain
	1309	B3GAT1	27087	11q25	0	0	neutral
	1310	B3GAT2	135152	6q13	0	0	neutral
	1311	B3GAT3	26229	11q12.3	0	0	neutral
	1312	B3GNT1	11041	11q13.2	0	0	neutral
	1313	B3GNT2	10678	2p15	0	0	neutral
	1314	B3GNT3	10331	19p13.11	0.287	0	neutral
	1315	B3GNT4	79369	12q24.31	0.12	0	neutral
	1316	B3GNT5	84002	3q27.1	-0.114	0.482	neutral
	1317	B3GNT6	192134	11q13.5	0	0.136	neutral
	1318	B3GNT7	93010	2q37.1	-0.186	0	neutral
	1319	B3GNT8	374907	19q13.2	0	0	neutral
	1320	B3GNT9	84752	16q22.1	0	0.556	neutral
	1321	B3GNTL1	146712	17q25.3	0	0	neutral
	1322	B4GALNT1	2583	12q13.3	0	0	neutral
	1323	B4GALNT2	124872	17q21.32	-0.405	0	neutral
	1324	B4GALNT3	283358	12p13.33	0	0	neutral
	1325	B4GALNT4	338707	11p15.5	0	0	neutral
	1326	B4GALT1	2683	9p21.1	-0.308	0	neutral
	1327	B4GALT2	8704	1p34.1	0.208	0.451	neutral
	1328	B4GALT3	8703	1q23.3	0.231	0	neutral
	1329	B4GALT4	8702	3q13.32	-0.176	0	neutral
	1330	B4GALT5	9334	20q13.13	0	0.479	neutral
	1331	B4GALT6	9331	18q12.1	-0.307	0	neutral
	1332	B4GALT7	11285	5q35.3	0	0	neutral
	1333	B7H6	374383	11p15.1	0.25	0	neutral
	1334	B9D1	27077	17p11.2	-0.405	0	neutral
	1335	B9D2	80776	19q13.2	0	0	neutral
	1336	BAALC	79870	8q22.3	0	0	neutral
	1337	BAAT	570	9q31.1	-0.144	-0.125	neutral
	1338	BABAM1	29086	19p13.11	0.287	0	neutral
	1339	BACE1	23621	11q23.3	0.271	-0.199	neutral
	1340	BACE1-AS	100379571	11q23.3	0.271	-0.199	neutral
	1341	BACE2	25825	21q22.2	0.157	-0.107	neutral
	1342	BACH1	571	21q21.3	0.157	-0.107	neutral
	1343	BACH2	60468	6q15	0	0	neutral
	1344	BAD	572	11q13.1	0	0	neutral
	1345	BAG1	573	9p13.3	-0.308	0	neutral
	1346	BAG2	9532	6p11.2	-0.158	0	neutral
	1347	BAG3	9531	10q26.11	0	0.981	neutral
	1348	BAG4	9530	8p11.23	-0.117	0	neutral
	1349	BAG5	9529	14q32.33	-0.169	0.165	neutral
	1350	BAG6	7917	6p21.33	0	-0.496	neutral
	1351	BAGE	574	21p11.1	0	-0.532	neutral
	1352	BAGE2	85319	21p11.1	0	-0.532	neutral
	1353	BAGE3	85318	21p11.1	0	-0.532	neutral
	1354	BAGE4	85317	21p11.1	0	-0.532	neutral
	1355	BAGE5	85316	21p11.1	0	-0.532	neutral
	1356	BAHCC1	57597	17q25.3	0	0	neutral
	1357	BAHD1	22893	15q15.1	0	0	neutral
	1358	BAI1	575	8q24.3	0	0	neutral
	1359	BAI2	576	1p35.2	0	0.439	neutral
	1360	BAI3	577	6q12	-0.185	0	neutral
	1361	BAIAP2	10458	17q25.3	0	0	neutral
	1362	BAIAP2L1	55971	7q21.3	0	-0.124	neutral
	1363	BAIAP2L2	80115	22q13.1	0	0	neutral
	1364	BAIAP3	8938	16p13.3	0	0	neutral
	1365	BAK1	578	6p21.31	0	0	neutral
	1366	BAMBI	25805	10p12.1	-0.133	-0.462	neutral
	1367	BANF1	8815	11q13.1	0	0	neutral
	1368	BANF2	140836	20p12.1	0.124	-0.637	neutral
	1369	BANK1	55024	4q24	-0.296	-0.163	neutral
	1370	BANP	54971	16q24.2	0.16	0	neutral
	1371	BAP1	8314	3p21.1	0	0.341	neutral
	1372	BARD1	580	2q35	0.339	0	neutral
	1373	BARHL1	56751	9q34.13	0.267	0.207	neutral
	1374	BARHL2	343472	1p22.2	0.103	0	neutral
	1375	BARX1	56033	9q22.32	-0.144	-0.125	neutral
	1376	BARX2	8538	11q24.3	-0.369	0	neutral
	1377	BASP1	10409	5p15.1	0	0	neutral
	1378	BASP1P1	646201	13q12.12	0.489	1.452	gain
	1379	BATF	10538	14q24.3	0	0	neutral
	1380	BATF2	116071	11q13.1	0	0	neutral
	1381	BATF3	55509	1q32.3	0.103	0.848	neutral
	1382	BAX	581	19q13.33	0	0	neutral
	1383	BAZ1A	11177	14q13.1	0	0.879	neutral
	1384	BAZ1B	9031	7q11.23	0	-0.124	neutral
	1385	BAZ2A	11176	12q13.3	0	0.667	neutral
	1386	BAZ2B	29994	2q24.2	0	0	neutral
	1387	BBC3	27113	19q13.32	0	0	neutral
	1388	BBIP1	92482	10q25.2	0	0	neutral
	1389	BBOX1	8424	11p14.2	0.25	0	neutral
	1390	BBS1	582	11q13.2	0	0	neutral
	1391	BBS10	79738	12q21.2	-0.185	-0.32	neutral
	1392	BBS12	166379	4q27	0	-0.102	neutral
	1393	BBS2	583	16q12.2	0	0.556	neutral
	1394	BBS4	585	15q24.1	0	0	neutral
	1395	BBS5	129880	2q31.1	0	0	neutral
	1396	BBS7	55212	4q27	0	0	neutral
	1397	BBS9	27241	7p14.3	0	0	neutral
	1398	BBX	56987	3q13.12	-0.401	0	neutral
	1399	BCAM	4059	19q13.32	0	0	neutral
	1400	BCAN	63827	1q23.1	-0.169	0	neutral
	1401	BCAP29	55973	7q22.3	-0.129	-0.124	neutral
	1402	BCAR1	9564	16q23.1	0	0	neutral
	1403	BCAR3	8412	1p22.1	0.59	0	neutral
	1404	BCAR4	400500	16p13.13	0	0	neutral
	1405	BCAS1	8537	20q13.2	0	0.797	neutral
	1406	BCAS2	10286	1p13.2	0	0	neutral
	1407	BCAS3	54828	17q23.2	-0.405	-0.33	loss
	1408	BCAS4	55653	20q13.13	0	0.797	neutral
	1409	BCAT1	586	12p12.1	0.369	0	neutral
	1410	BCAT2	587	19q13.33	0	0	neutral
	1411	BCCIP	56647	10q26.2	0	0.981	neutral
	1412	BCDIN3D	144233	12q13.12	0.414	0	neutral
	1413	BCHE	590	3q26.1	-0.148	-0.173	neutral
	1414	BCKDHA	593	19q13.2	0	0	neutral
	1415	BCKDHB	594	6q14.1	0	0	neutral
	1416	BCKDK	10295	16p11.2	0	0.556	neutral
	1417	BCL10	8915	1p22.3	0.103	-0.421	neutral
	1418	BCL11A	53335	2p16.1	0	0	neutral
	1419	BCL11B	64919	14q32.2	-0.169	0	neutral
	1420	BCL2	596	18q21.33	0	0	neutral
	1421	BCL2A1	597	15q25.1	0	0	neutral
	1422	BCL2L1	598	20q11.21	0.124	-0.637	neutral
	1423	BCL2L10	10017	15q21.2	0	0	neutral
	1424	BCL2L11	10018	2q13	-0.206	0.231	neutral
	1425	BCL2L12	83596	19q13.33	0	0	neutral
	1426	BCL2L13	23786	22q11.21	-0.148	0.367	neutral
	1427	BCL2L14	79370	12p13.2	0	0	neutral
	1428	BCL2L15	440603	1p13.2	0	0	neutral
	1429	BCL2L2	599	14q11.2	0	0.879	neutral
	1430	BCL2L2-PABPN1	100529063	14q11.2	0	0.879	neutral
	1431	BCL3	602	19q13.32	0	0	neutral
	1432	BCL6	604	3q27.3	-0.114	0.482	neutral
	1433	BCL6B	255877	17p13.1	0	0	neutral
	1434	BCL7A	605	12q24.31	0.12	0	neutral
	1435	BCL7B	9275	7q11.23	0	-0.124	neutral
	1436	BCL7C	9274	16p11.2	0	0.556	neutral
	1437	BCL9	607	1q21.2	-0.169	0	neutral
	1438	BCL9L	283149	11q23.3	0	0	neutral
	1439	BCLAF1	9774	6q23.3	0.313	0	neutral
	1440	BCMO1	53630	16q23.2	0.16	0	neutral
	1441	BCO2	83875	11q23.1	0.271	-0.199	neutral
	1442	BCR	613	22q11.23	-0.608	0	neutral
	1443	BCRP2	400892	22q11.21	0	0	neutral
	1444	BCRP3	644165	22q11.23	-0.608	0	neutral
	1445	BCS1L	617	2q35	-0.186	0	neutral
	1446	BDAG1	57653	9q22.33	-0.144	-0.125	neutral
	1447	BDH1	622	3q29	-0.114	0	neutral
	1448	BDH2	56898	4q24	-0.296	-0.163	neutral
	1449	BDKRB1	623	14q32.2	-0.169	0	neutral
	1450	BDKRB2	624	14q32.2	-0.169	0	neutral
	1451	BDNF	627	11p14.1	0.25	0	neutral
	1452	BDNF-AS1	497258	11p14.1	0.25	0	neutral
	1453	BDP1	55814	5q13.2	0.668	0.116	neutral
	1454	BEAN1	146227	16q21	0	0.556	neutral
	1455	BECN1	8678	17q21.31	-0.405	0	neutral
	1456	BEGAIN	57596	14q32.2	-0.169	0	neutral
	1457	BEND3	57673	6q21	0	0	neutral
	1458	BEND4	389206	4p13	0	-0.163	neutral
	1459	BEND5	79656	1p33	0.208	0.451	neutral
	1460	BEND6	221336	6p12.1	-0.158	0	neutral
	1461	BEND7	222389	10p13	0	0.327	neutral
	1462	BEST1	7439	11q12.3	0	0	neutral
	1463	BEST2	54831	19p13.2	-0.149	-0.155	neutral
	1464	BEST3	144453	12q15	-0.185	-0.32	neutral
	1465	BEST4	266675	1p34.1	0.208	0.451	neutral
	1466	BET1	10282	7q21.3	0	-0.124	neutral
	1467	BET1L	51272	11p15.5	0	0	neutral
	1468	BET3L	100128327	6q22.1	0	0	neutral
	1469	BFAR	51283	16p13.12	0	0	neutral
	1470	BFSP1	631	20p12.1	0.124	-0.637	neutral
	1471	BFSP2	8419	3q22.1	-0.385	0	neutral
	1472	BGLAP	632	1q22	-0.169	0	neutral
	1473	BHLHA15	168620	7q21.3	0	-0.124	neutral
	1474	BHLHA9	727857	17p13.3	0	0	neutral
	1475	BHLHE22	27319	8q12.3	0	0	neutral
	1476	BHLHE23	128408	20q13.33	0.124	0	neutral
	1477	BHLHE40	8553	3p26.1	0	0	neutral
	1478	BHLHE41	79365	12p12.1	0	0	neutral
	1479	BHMT	635	5q14.1	0.265	0	neutral
	1480	BHMT2	23743	5q14.1	0.265	0	neutral
	1481	BICC1	80114	10q21.1	-0.163	0	neutral
	1482	BICD1	636	12p11.21	-0.115	0	neutral
	1483	BICD2	23299	9q22.31	-0.144	-0.125	neutral
	1484	BID	637	22q11.21	-0.148	0.367	neutral
	1485	BIK	638	22q13.2	0	0	neutral
	1486	BIN1	274	2q14.3	0.142	0.351	neutral
	1487	BIN2	51411	12q13.13	0.414	0	neutral
	1488	BIN3	55909	8p21.3	0	0	neutral
	1489	BIRC2	329	11q22.2	0	-0.557	neutral
	1490	BIRC3	330	11q22.2	0	-0.557	neutral
	1491	BIRC5	332	17q25.3	0	0	neutral
	1492	BIRC6	57448	2p22.3	0.169	-0.272	neutral
	1493	BIRC7	79444	20q13.33	0.124	0	neutral
	1494	BIRC8	112401	19q13.42	0.116	-0.162	neutral
	1495	BIVM	54841	13q33.1	-0.276	0	neutral
	1496	BIVM-ERCC5	100533467	13q33.1	-0.276	0	neutral
	1497	BK250D10.8	339674	22q13.2	0	0	neutral
	1498	BLCAP	10904	20q11.23	0.124	-0.637	neutral
	1499	BLID	414899	11q24.1	0	0	neutral
	1500	BLK	640	8p23.1	-0.162	0	neutral
	1501	BLM	641	15q26.1	0	0	neutral
	1502	BLMH	642	17q11.2	-0.405	0	neutral
	1503	BLNK	29760	10q24.1	-0.148	0	neutral
	1504	BLOC1S1	2647	12q13.2	0	0	neutral
	1505	BLOC1S1-RDH5	100528022	12q13.2	0	0	neutral
	1506	BLOC1S2	282991	10q24.31	0	0	neutral
	1507	BLOC1S3	388552	19q13.32	0	0	neutral
	1508	BLVRA	644	7p13	0	0	neutral
	1509	BLVRB	645	19q13.2	0	0	neutral
	1510	BLZF1	8548	1q24.2	-0.151	0	neutral
	1511	BMF	90427	15q15.1	0	0	neutral
	1512	BMI1	648	10p12.2	0	-0.462	neutral
	1513	BMP1	649	8p21.3	0	0	neutral
	1514	BMP10	27302	2p13.3	-0.213	0	neutral
	1515	BMP2	650	20p12.3	0.124	-0.637	neutral
	1516	BMP2K	55589	4q21.21	0	-0.163	neutral
	1517	BMP3	651	4q21.21	0	-0.163	neutral
	1518	BMP4	652	14q22.2	0	0	neutral
	1519	BMP5	653	6p12.1	0.312	-0.406	neutral
	1520	BMP6	654	6p24.3	0	3.657	neutral
	1521	BMP7	655	20q13.31	0	0.797	neutral
	1522	BMP8A	353500	1p34.3	0.208	0.451	neutral
	1523	BMP8B	656	1p34.2	0.208	0.451	neutral
	1524	BMPER	168667	7p14.3	0	0	neutral
	1525	BMPR1A	657	10q23.2	0.545	0	neutral
	1526	BMPR1B	658	4q22.3	0	-0.163	neutral
	1527	BMPR2	659	2q33.1	-0.301	0.133	neutral
	1528	BMS1	9790	10q11.21	-0.133	-0.462	neutral
	1529	BMS1P1	728053	10q11.22	0.144	0	neutral
	1530	BMS1P4	729096	10q22.2	-0.17	0	neutral
	1531	BMS1P5	399761	10q11.22	0.144	0	neutral
	1532	BNC1	646	15q25.2	0	0	neutral
	1533	BNC2	54796	9p22.3	-0.101	0	neutral
	1534	BNIP1	662	5q35.1	0	0	neutral
	1535	BNIP2	663	15q22.2	0	0	neutral
	1536	BNIP3	664	10q26.3	-0.154	0	neutral
	1537	BNIP3L	665	8p21.2	-0.151	0	neutral
	1538	BNIPL	149428	1q21.3	-0.169	0	neutral
	1539	BOC	91653	3q13.2	-0.176	0	neutral
	1540	BOD1	91272	5q35.2	0	0	neutral
	1541	BOD1L	259282	4p15.33	0	0	neutral
	1542	BOD1P	284257	18q21.31	0.153	0	neutral
	1543	BOK	666	2q37.3	0	0	neutral
	1544	BOK-AS1	100379249	2q37.3	0	0	neutral
	1545	BOLA1	51027	1q21.2	-0.169	0	neutral
	1546	BOLA2	552900	16p11.2	0	0.556	neutral
	1547	BOLA2B	654483	16p11.2	0	0.556	neutral
	1548	BOLA3	388962	2p13.1	-0.213	0	neutral
	1549	BOLA3-AS1	100507171	2p13.1	-0.213	0	neutral
	1550	BOLL	66037	2q33.1	-0.301	0.133	neutral
	1551	BOP1	23246	8q24.3	-0.336	0	neutral
	1552	BORA	79866	13q22.1	0	0	neutral
	1553	BPESC1	60467	3q23	-0.134	0	neutral
	1554	BPGM	669	7q33	-0.201	0	neutral
	1555	BPHL	670	6p25.2	-0.131	3.657	neutral
	1556	BPI	671	20q11.23	0.124	-0.637	neutral
	1557	BPIFA1	51297	20q11.21	0.124	-0.637	neutral
	1558	BPIFA2	140683	20q11.21	0.124	-0.637	neutral
	1559	BPIFA3	128861	20q11.21	0.124	-0.637	neutral
	1560	BPIFA4P	317716	20q11.21	0.124	-0.637	neutral
	1561	BPIFB1	92747	20q11.21	0.124	-0.637	neutral
	1562	BPIFB2	80341	20q11.21	0.124	-0.637	neutral
	1563	BPIFB3	359710	20q11.21	0.124	-0.637	neutral
	1564	BPIFB4	149954	20q11.21	0.124	-0.637	neutral
	1565	BPIFB6	128859	20q11.21	0.124	-0.637	neutral
	1566	BPIFC	254240	22q12.3	0	0	neutral
	1567	BPNT1	10380	1q41	-0.756	0	neutral
	1568	BPTF	2186	17q24.2	-0.176	-0.578	neutral
	1569	BRAF	673	7q34	-0.201	0	neutral
	1570	BRAP	8315	12q24.12	0.12	-0.178	neutral
	1571	BRAT1	221927	7p22.3	0	0	neutral
	1572	BRCA1	672	17q21.31	-0.405	0	neutral
	1573	BRCA2	675	13q13.1	0.693	1.452	gain
	1574	BRD1	23774	22q13.33	0	0	neutral
	1575	BRD2	6046	6p21.32	0	0	neutral
	1576	BRD3	8019	9q34.2	0.267	0.207	neutral
	1577	BRD4	23476	19p13.12	-0.149	-0.155	neutral
	1578	BRD7	29117	16q12.1	0	0.556	neutral
	1579	BRD7P3	23629	6q22.31	0	-0.652	neutral
	1580	BRD8	10902	5q31.2	0.155	-0.153	neutral
	1581	BRD9	65980	5p15.33	-0.135	0	neutral
	1582	BRDT	676	1p22.1	0.103	-0.115	neutral
	1583	BRE	9577	2p23.2	-0.216	0	neutral
	1584	BREA2	286076	8q24.3	0	0.131	neutral
	1585	BRF1	2972	14q32.33	-0.169	0.165	neutral
	1586	BRF2	55290	8p11.23	-0.117	0	neutral
	1587	BRI3	25798	7q21.3	0	-0.124	neutral
	1588	BRI3BP	140707	12q24.31	0	0	neutral
	1589	BRIP1	83990	17q23.2	-0.405	-0.33	loss
	1590	BRIX1	55299	5p13.2	0	0	neutral
	1591	BRK1	55845	3p25.3	0	0	neutral
	1592	BRMS1	25855	11q13.2	0	0	neutral
	1593	BRMS1L	84312	14q13.2	0	0.879	neutral
	1594	BROX	148362	1q41	-0.208	0	neutral
	1595	BRP44	25874	1q24.2	0	0	neutral
	1596	BRP44L	51660	6q27	0	0.486	neutral
	1597	BRPF1	7862	3p25.3	0	0	neutral
	1598	BRPF3	27154	6p21.31	0.143	-0.142	neutral
	1599	BRSK1	84446	19q13.42	0	0	neutral
	1600	BRSK2	9024	11p15.5	0	0	neutral
	1601	BRWD1	54014	21q22.2	0.157	-0.107	neutral
	1602	BRWD1-IT2	257357	21q22.2	0.157	-0.107	neutral
	1603	BSCL2	26580	11q12.3	0	0	neutral
	1604	BSDC1	55108	1p35.1	0	0.439	neutral
	1605	BSG	682	19p13.3	-0.149	-0.155	neutral
	1606	BSN	8927	3p21.31	0	0.341	neutral
	1607	BSN-AS2	100132677	3p21.31	0	0.341	neutral
	1608	BSND	7809	1p32.3	-0.432	0	neutral
	1609	BSPH1	100131137	19q13.33	0.13	0	neutral
	1610	BSPRY	54836	9q32	0.267	-0.105	neutral
	1611	BST1	683	4p15.32	0.284	0	neutral
	1612	BST2	684	19p13.11	0.287	0	neutral
	1613	BSX	390259	11q24.1	0	0	neutral
	1614	BTAF1	9044	10q23.32	0	0	neutral
	1615	BTBD1	53339	15q25.2	0	0	neutral
	1616	BTBD10	84280	11p15.2	0.147	0	neutral
	1617	BTBD11	121551	12q23.3	0.12	-0.178	neutral
	1618	BTBD16	118663	10q26.13	0	0.981	neutral
	1619	BTBD17	388419	17q25.1	-0.137	0	neutral
	1620	BTBD18	643376	11q12.1	-0.158	0	neutral
	1621	BTBD19	149478	1p34.1	0.208	0.451	neutral
	1622	BTBD2	55643	19p13.3	-0.149	-0.155	neutral
	1623	BTBD3	22903	20p12.2	0.124	-0.637	neutral
	1624	BTBD6	90135	14q32.33	-0.169	0.165	neutral
	1625	BTBD7	55727	14q32.12	-0.169	0	neutral
	1626	BTBD8	284697	1p22.1	0	-0.115	neutral
	1627	BTBD9	114781	6p21.2	0.143	-0.142	neutral
	1628	BTC	685	4q13.3	0	-0.163	neutral
	1629	BTD	686	3p25.1	0	0	neutral
	1630	BTF3	689	5q13.2	0.668	0.116	neutral
	1631	BTF3L4	91408	1p32.3	0.208	0	neutral
	1632	BTF3P11	690	13q22.3	-0.128	0	neutral
	1633	BTG1	694	12q21.33	0	-0.172	neutral
	1634	BTG2	7832	1q32.1	0	0	neutral
	1635	BTG3	10950	21q21.1	0	0.406	neutral
	1636	BTG4	54766	11q23.1	0	0	neutral
	1637	BTLA	151888	3q13.2	-0.176	0	neutral
	1638	BTN1A1	696	6p22.2	-0.305	0	neutral
	1639	BTN2A1	11120	6p22.2	-0.305	0	neutral
	1640	BTN2A2	10385	6p22.2	-0.258	0	neutral
	1641	BTN2A3P	54718	6p22.2	0	0	neutral
	1642	BTN3A1	11119	6p22.2	0	0	neutral
	1643	BTN3A2	11118	6p22.2	-0.258	0	neutral
	1644	BTN3A3	10384	6p22.2	-0.305	0	neutral
	1645	BTNL2	56244	6p21.32	0	0	neutral
	1646	BTNL3	10917	5q35.3	0	0	neutral
	1647	BTNL8	79908	5q35.3	0	0	neutral
	1648	BTNL9	153579	5q35.3	0	0	neutral
	1649	BTRC	8945	10q24.32	0	0	neutral
	1650	BUB1	699	2q13	-0.206	0.231	neutral
	1651	BUB1B	701	15q15.1	0	0	neutral
	1652	BUB3	9184	10q26.13	0	0.981	neutral
	1653	BUD13	84811	11q23.3	0.271	-0.199	neutral
	1654	BUD31	8896	7q22.1	0	-0.124	neutral
	1655	BVES	11149	6q21	0	0	neutral
	1656	BVES-AS1	154442	6q21	0	0	neutral
	1657	BYSL	705	6p21.1	0.143	0	neutral
	1658	BZRAP1	9256	17q22	-0.405	-0.33	loss
	1659	BZW1	9689	2q33.1	-0.301	0.133	neutral
	1660	BZW2	28969	7p21.1	0	0	neutral
	1661	C10orf10	11067	10q11.21	-0.133	0.335	neutral
	1662	C10orf103	414245	10q22.2	-0.17	0	neutral
	1663	C10orf105	414152	10q22.1	-0.17	0	neutral
	1664	C10orf107	219621	10q21.2	-0.163	0	neutral
	1665	C10orf108	414235	10p15.3	0	0.194	neutral
	1666	C10orf11	83938	10q22.2	-0.17	0	neutral
	1667	C10orf111	221060	10p13	0	0.327	neutral
	1668	C10orf113	387638	10p12.31	0	0	neutral
	1669	C10orf114	399726	10p12.31	0	0	neutral
	1670	C10orf116	10974	10q23.2	0.545	0	neutral
	1671	C10orf118	55088	10q25.3	0	0	neutral
	1672	C10orf12	26148	10q24.1	-0.148	0	neutral
	1673	C10orf120	399814	10q26.13	0	0.981	neutral
	1674	C10orf122	387718	10q26.13	0	0.981	neutral
	1675	C10orf125	282969	10q26.3	-0.154	0	neutral
	1676	C10orf128	170371	10q11.23	0.144	0	neutral
	1677	C10orf129	142827	10q23.33	-0.148	0	neutral
	1678	C10orf131	100127889	10q24.1	-0.148	0	neutral
	1679	C10orf136	414260	10q11.21	-0.133	0.335	neutral
	1680	C10orf137	26098	10q26.13	0	0.981	neutral
	1681	C10orf140	387640	10p12.31	0	0	neutral
	1682	C10orf2	56652	10q24.31	0	0	neutral
	1683	C10orf25	220979	10q11.21	-0.133	0.335	neutral
	1684	C10orf26	54838	10q24.32	0	0	neutral
	1685	C10orf27	219793	10q22.1	-0.17	0	neutral
	1686	C10orf28	27291	10q24.2	-0.148	0	neutral
	1687	C10orf32	119032	10q24.32	0	0	neutral
	1688	C10orf32-AS3MT	100528007	10q24.32	0	0	neutral
	1689	C10orf35	219738	10q22.1	-0.17	0	neutral
	1690	C10orf40	283025	10q21.2	-0.163	0	neutral
	1691	C10orf46	143384	10q26.11	0	0	neutral
	1692	C10orf47	254427	10p14	0	0.327	neutral
	1693	C10orf53	282966	10q11.23	0.144	0	neutral
	1694	C10orf54	64115	10q22.1	-0.17	0	neutral
	1695	C10orf55	414236	10q22.2	-0.17	0	neutral
	1696	C10orf58	84293	10q23.1	-0.17	0	neutral
	1697	C10orf62	414157	10q24.2	-0.148	0	neutral
	1698	C10orf67	256815	10p12.2	-0.133	-0.462	neutral
	1699	C10orf68	79741	10p11.22	-0.133	-0.462	neutral
	1700	C10orf71	118461	10q11.23	0.144	0	neutral
	1701	C10orf76	79591	10q24.32	0	0	neutral
	1702	C10orf81	79949	10q25.3	0	0	neutral
	1703	C10orf82	143379	10q25.3	0	0	neutral
	1704	C10orf88	80007	10q26.13	0	0.981	neutral
	1705	C10orf90	118611	10q26.2	0	0.981	neutral
	1706	C10orf91	170393	10q26.3	-0.154	0	neutral
	1707	C10orf95	79946	10q24.32	0	0	neutral
	1708	C10orf96	374355	10q25.3	0	0	neutral
	1709	C10orf99	387695	10q23.1	-0.555	0	neutral
	1710	C11orf1	64776	11q23.1	0	0	neutral
	1711	C11orf10	746	11q12.2	0	0	neutral
	1712	C11orf16	56673	11p15.4	0	0	neutral
	1713	C11orf2	738	11q13.1	0	0	neutral
	1714	C11orf20	25858	11q13.1	0	0	neutral
	1715	C11orf21	29125	11p15.5	0	0	neutral
	1716	C11orf24	53838	11q13.2	-0.16	0	neutral
	1717	C11orf30	56946	11q13.5	0	0.136	neutral
	1718	C11orf31	280636	11q12.1	-0.158	0	neutral
	1719	C11orf34	349633	11q23.1	0.271	-0.199	neutral
	1720	C11orf35	256329	11p15.5	0	0	neutral
	1721	C11orf36	283303	11p15.4	0	0	neutral
	1722	C11orf40	143501	11p15.4	0	0	neutral
	1723	C11orf41	25758	11p13	0	0	neutral
	1724	C11orf42	160298	11p15.4	0	0	neutral
	1725	C11orf45	219833	11q24.3	-0.369	0	neutral
	1726	C11orf46	120534	11p14.1	0.25	0	neutral
	1727	C11orf48	79081	11q12.3	0	0	neutral
	1728	C11orf49	79096	11p11.2	0	0	neutral
	1729	C11orf51	25906	11q13.4	0	0	neutral
	1730	C11orf52	91894	11q23.1	0	0	neutral
	1731	C11orf53	341032	11q23.1	0	0.265	neutral
	1732	C11orf54	28970	11q21	0	0	neutral
	1733	C11orf57	55216	11q23.1	0.271	-0.199	neutral
	1734	C11orf58	10944	11p15.1	0.25	0	neutral
	1735	C11orf61	79684	11q24.2	-0.139	0	neutral
	1736	C11orf63	79864	11q24.1	0	0	neutral
	1737	C11orf65	160140	11q22.3	0	0.265	neutral
	1738	C11orf67	28971	11q14.1	0	0	neutral
	1739	C11orf68	83638	11q13.1	0	0	neutral
	1740	C11orf70	85016	11q22.1	0	-0.557	neutral
	1741	C11orf71	54494	11q23.2	0.271	-0.199	neutral
	1742	C11orf73	51501	11q14.2	0	0	neutral
	1743	C11orf74	119710	11p12	0	0	neutral
	1744	C11orf75	56935	11q21	0	0	neutral
	1745	C11orf80	79703	11q13.2	0	0	neutral
	1746	C11orf82	220042	11q14.1	0	-0.134	neutral
	1747	C11orf83	790955	11q12.3	0	0	neutral
	1748	C11orf84	144097	11q13.1	0	0	neutral
	1749	C11orf85	283129	11q13.1	0	0	neutral
	1750	C11orf86	254439	11q13.2	0	0	neutral
	1751	C11orf87	399947	11q22.3	0	0.265	neutral
	1752	C11orf88	399949	11q23.1	0	0	neutral
	1753	C11orf9	745	11q12.2	0	0	neutral
	1754	C11orf91	100131378	11p13	0	0	neutral
	1755	C11orf92	399948	11q23.1	0	0.265	neutral
	1756	C11orf93	120376	11q23.1	0	0.265	neutral
	1757	C11orf94	143678	11p11.2	0	0	neutral
	1758	C11orf95	65998	11q13.1	0	0	neutral
	1759	C11orf96	387763	11p11.2	0	0	neutral
	1760	C12orf10	60314	12q13.13	0	0	neutral
	1761	C12orf12	196477	12q21.33	0	-0.172	neutral
	1762	C12orf23	90488	12q23.3	0.12	-0.178	neutral
	1763	C12orf26	84190	12q21.31	0.143	-0.172	neutral
	1764	C12orf29	91298	12q21.32	0.143	-0.172	neutral
	1765	C12orf32	83695	12p13.33	0	0	neutral
	1766	C12orf33	253128	12p13.31	0.124	-0.137	neutral
	1767	C12orf34	84915	12q24.11	0.12	-0.178	neutral
	1768	C12orf35	55196	12p11.21	0	0	neutral
	1769	C12orf36	283422	12p13.1	0.444	0	neutral
	1770	C12orf37	439916	12q21.33	0	-0.172	neutral
	1771	C12orf39	80763	12p12.1	0	0	neutral
	1772	C12orf4	57102	12p13.32	0	0	neutral
	1773	C12orf40	283461	12q12	0.414	0	neutral
	1774	C12orf42	374470	12q23.2	0	0.627	neutral
	1775	C12orf43	64897	12q24.31	0.12	0	neutral
	1776	C12orf44	60673	12q13.13	0.414	0	neutral
	1777	C12orf45	121053	12q23.3	0.12	-0.178	neutral
	1778	C12orf47	51275	12q24.12	0.12	-0.178	neutral
	1779	C12orf49	79794	12q24.22	0.12	0	neutral
	1780	C12orf5	57103	12p13.32	0	0	neutral
	1781	C12orf50	160419	12q21.32	0.143	-0.172	neutral
	1782	C12orf51	283450	12q24.13	0.12	-0.178	neutral
	1783	C12orf52	84934	12q24.13	0.12	-0.178	neutral
	1784	C12orf53	196500	12p13.31	0	0	neutral
	1785	C12orf54	121273	12q13.11	0.414	0	neutral
	1786	C12orf56	115749	12q14.2	-0.124	0	neutral
	1787	C12orf57	113246	12p13.31	0	0	neutral
	1788	C12orf59	120939	12p13.2	0	0	neutral
	1789	C12orf60	144608	12p12.3	0	0	neutral
	1790	C12orf61	283416	12q14.1	-0.145	0	neutral
	1791	C12orf62	84987	12q13.12	0.414	0	neutral
	1792	C12orf65	91574	12q24.31	0.12	0	neutral
	1793	C12orf66	144577	12q14.2	-0.124	0	neutral
	1794	C12orf68	387856	12q13.11	0.414	0	neutral
	1795	C12orf69	440087	12p12.3	0	0	neutral
	1796	C12orf70	341346	12p11.23	-0.126	0	neutral
	1797	C12orf71	728858	12p11.23	-0.126	0	neutral
	1798	C12orf73	728568	12q23.3	0	0.627	neutral
	1799	C12orf74	338809	12q22	0	-0.172	neutral
	1800	C12orf75	387882	12q23.3	0.12	-0.178	neutral
	1801	C12orf76	400073	12q24.11	0.12	-0.178	neutral
	1802	C12orf77	196415	12p12.1	0	0	neutral
	1803	C13orf15	28984	13q14.11	1.113	1.452	gain
	1804	C13orf33	84935	13q12.3	0.693	1.452	gain
	1805	C13orf35	400165	13q34	-0.114	0.662	neutral
	1806	C14orf1	11161	14q24.3	0	0	neutral
	1807	C14orf101	54916	14q22.3	0	0	neutral
	1808	C14orf102	55051	14q32.11	0	0	neutral
	1809	C14orf105	55195	14q22.3	0	0	neutral
	1810	C14orf109	26175	14q32.12	-0.169	0	neutral
	1811	C14orf118	55668	14q24.3	0	0	neutral
	1812	C14orf119	55017	14q11.2	0	0	neutral
	1813	C14orf126	112487	14q12	0	0.879	neutral
	1814	C14orf129	51527	14q32.2	-0.169	0	neutral
	1815	C14orf132	56967	14q32.2	-0.169	0	neutral
	1816	C14orf133	63894	14q24.3	0	0	neutral
	1817	C14orf135	64430	14q23.1	0	0	neutral
	1818	C14orf142	84520	14q32.12	-0.169	0	neutral
	1819	C14orf149	112849	14q23.1	0	0	neutral
	1820	C14orf159	80017	14q32.11	-0.169	0	neutral
	1821	C14orf162	56936	14q24.1	0	0	neutral
	1822	C14orf165	414767	14q11.2	0	0.879	neutral
	1823	C14orf166	51637	14q22.1	0	0	neutral
	1824	C14orf166B	145497	14q24.3	0	0	neutral
	1825	C14orf167	55449	14q11.2	0	0.879	neutral
	1826	C14orf169	79697	14q24.3	0.102	0	neutral
	1827	C14orf176	643382	14q11.2	-0.107	0	neutral
	1828	C14orf177	283598	14q32.2	-0.169	0	neutral
	1829	C14orf178	283579	14q24.3	0	0	neutral
	1830	C14orf180	400258	14q32.33	-0.169	0.165	neutral
	1831	C14orf182	283551	14q21.3	0	0.879	neutral
	1832	C14orf183	196913	14q21.3	0	0.879	neutral
	1833	C14orf2	9556	14q32.33	-0.169	0.165	neutral
	1834	C14orf21	161424	14q12	0	0.879	neutral
	1835	C14orf23	387978	14q12	0	0.879	neutral
	1836	C14orf28	122525	14q21.2	0	0.879	neutral
	1837	C14orf37	145407	14q23.1	0	0	neutral
	1838	C14orf38	729665	14q23.1	0	0	neutral
	1839	C14orf39	317761	14q23.1	0	0	neutral
	1840	C14orf43	91748	14q24.3	0.102	0	neutral
	1841	C14orf45	80127	14q24.3	0.102	0	neutral
	1842	C14orf49	161176	14q32.13	-0.169	0	neutral
	1843	C14orf55	317760	14q24.2	0.115	0	neutral
	1844	C14orf64	388011	14q32.2	-0.169	0	neutral
	1845	C14orf79	122616	14q32.33	-0.169	0.165	neutral
	1846	C14orf80	283643	14q32.33	-0.169	0.165	neutral
	1847	C14orf93	60686	14q11.2	0	0	neutral
	1848	C15orf17	57184	15q24.1	0	0	neutral
	1849	C15orf2	23742	15q11.2	0	0	neutral
	1850	C15orf23	90417	15q15.1	0	0	neutral
	1851	C15orf24	56851	15q14	0	0	neutral
	1852	C15orf26	161502	15q25.1	0	0	neutral
	1853	C15orf27	123591	15q24.2	0	0	neutral
	1854	C15orf29	79768	15q14	0	0	neutral
	1855	C15orf32	145858	15q26.1	0	0	neutral
	1856	C15orf33	196951	15q21.2	0	0	neutral
	1857	C15orf34	80072	15q23	0	0	neutral
	1858	C15orf37	283687	15q25.1	0	0	neutral
	1859	C15orf38	348110	15q26.1	0	0	neutral
	1860	C15orf38-AP3S2	100526783	15q26.1	0	0	neutral
	1861	C15orf39	56905	15q24.2	0	0	neutral
	1862	C15orf40	123207	15q25.2	0	0	neutral
	1863	C15orf41	84529	15q14	0	0	neutral
	1864	C15orf42	90381	15q26.1	0	0	neutral
	1865	C15orf43	145645	15q21.1	0	0	neutral
	1866	C15orf44	81556	15q22.31	0	0	neutral
	1867	C15orf48	84419	15q21.1	0	0	neutral
	1868	C15orf5	81698	15q24.3	0	0	neutral
	1869	C15orf50	414926	15q23	0	0	neutral
	1870	C15orf52	388115	15q15.1	0	0	neutral
	1871	C15orf53	400359	15q14	0	0	neutral
	1872	C15orf54	400360	15q14	0	0	neutral
	1873	C15orf55	256646	15q14	0	0	neutral
	1874	C15orf56	644809	15q15.1	0	0	neutral
	1875	C15orf57	90416	15q15.1	0	0	neutral
	1876	C15orf58	390637	15q26.1	0	0	neutral
	1877	C15orf59	388135	15q24.1	0	0	neutral
	1878	C15orf60	283677	15q24.1	0	0	neutral
	1879	C15orf61	145853	15q23	0	0	neutral
	1880	C15orf62	643338	15q15.1	0	0	neutral
	1881	C15orf63	25764	15q15.3	0	0	neutral
	1882	C16orf11	146325	16p13.3	0	0	neutral
	1883	C16orf13	84326	16p13.3	0	0	neutral
	1884	C16orf3	750	16q24.3	0.16	0	neutral
	1885	C16orf42	115939	16p13.3	0	0	neutral
	1886	C16orf45	89927	16p13.11	0	0	neutral
	1887	C16orf46	123775	16q23.2	0.16	0	neutral
	1888	C16orf48	84080	16q22.1	0	0.556	neutral
	1889	C16orf5	29965	16p13.3	0	0	neutral
	1890	C16orf52	730094	16p12.2	0	0.556	neutral
	1891	C16orf53	79447	16p11.2	0	0.556	neutral
	1892	C16orf54	283897	16p11.2	0	0.556	neutral
	1893	C16orf55	124045	16q24.3	0.16	0	neutral
	1894	C16orf57	79650	16q21	0	0.556	neutral
	1895	C16orf58	64755	16p11.2	0	0.556	neutral
	1896	C16orf59	80178	16p13.3	0	0	neutral
	1897	C16orf61	56942	16q23.2	0.16	0	neutral
	1898	C16orf62	57020	16p12.3	0	0.556	neutral
	1899	C16orf7	9605	16q24.3	0.16	0	neutral
	1900	C16orf70	80262	16q22.1	0	0.556	neutral
	1901	C16orf71	146562	16p13.3	0	0	neutral
	1902	C16orf72	29035	16p13.2	0	0	neutral
	1903	C16orf73	254528	16p13.3	0	0	neutral
	1904	C16orf74	404550	16q24.1	0.16	0	neutral
	1905	C16orf78	123970	16q12.1	0	0.556	neutral
	1906	C16orf79	283870	16p13.3	0	0	neutral
	1907	C16orf80	29105	16q21	0	0.556	neutral
	1908	C16orf82	162083	16p12.1	0	0.556	neutral
	1909	C16orf86	388284	16q22.1	0	0.556	neutral
	1910	C16orf87	388272	16q11.2	0	0.556	neutral
	1911	C16orf88	400506	16p12.3	0	0.556	neutral
	1912	C16orf89	146556	16p13.3	0	0	neutral
	1913	C16orf90	646174	16p13.3	0	0	neutral
	1914	C16orf91	283951	16p13.3	0	0	neutral
	1915	C16orf92	146378	16p11.2	0	0.556	neutral
	1916	C16orf93	90835	16p11.2	0	0.556	neutral
	1917	C16orf95	100506581	16q24.2	0.16	0	neutral
	1918	C16orf96	342346	16p13.3	0	0	neutral
	1919	C17orf100	388327	17p13.1	0	0	neutral
	1920	C17orf101	79701	17q25.3	0	0	neutral
	1921	C17orf102	400591	17q12	-0.405	0	neutral
	1922	C17orf103	256302	17p11.2	-0.405	0	neutral
	1923	C17orf104	284071	17q21.31	-0.405	0	neutral
	1924	C17orf105	284067	17q21.31	-0.405	0	neutral
	1925	C17orf107	100130311	17p13.2	0	0	neutral
	1926	C17orf108	201229	17q11.2	-0.405	0	neutral
	1927	C17orf109	643008	17q25.1	0	0	neutral
	1928	C17orf110	100130933	17q25.1	0	0	neutral
	1929	C17orf28	283987	17q25.1	0	0	neutral
	1930	C17orf39	79018	17p11.2	-0.405	0	neutral
	1931	C17orf46	124783	17q21.31	-0.405	0	neutral
	1932	C17orf47	284083	17q22	-0.405	-0.33	loss
	1933	C17orf48	56985	17p13.1	0	0	neutral
	1934	C17orf49	124944	17p13.1	0	0	neutral
	1935	C17orf50	146853	17q12	-0.405	0	neutral
	1936	C17orf51	339263	17p11.2	-0.405	0	neutral
	1937	C17orf53	78995	17q21.31	-0.405	0	neutral
	1938	C17orf56	146705	17q25.3	0	0	neutral
	1939	C17orf57	124989	17q21.32	-0.405	0	neutral
	1940	C17orf58	284018	17q24.2	-0.176	-0.578	neutral
	1941	C17orf59	54785	17p13.1	0	0	neutral
	1942	C17orf61	254863	17p13.1	0	0	neutral
	1943	C17orf61-PLSCR3	100529211	17p13.1	0	0	neutral
	1944	C17orf62	79415	17q25.3	0	0	neutral
	1945	C17orf63	55731	17q11.2	-0.405	0	neutral
	1946	C17orf64	124773	17q23.2	-0.405	-0.33	loss
	1947	C17orf65	339201	17q21.31	-0.405	0	neutral
	1948	C17orf66	256957	17q12	-0.405	0	neutral
	1949	C17orf67	339210	17q22	-0.405	-0.33	loss
	1950	C17orf69	147081	17q21.31	-0.405	0	neutral
	1951	C17orf70	80233	17q25.3	0	0	neutral
	1952	C17orf72	92340	17q23.3	-0.405	-0.33	loss
	1953	C17orf74	201243	17p13.1	0	0	neutral
	1954	C17orf75	64149	17q11.2	-0.405	0	neutral
	1955	C17orf76-AS1	125144	17p11.2	-0.405	0	neutral
	1956	C17orf77	146723	17q25.1	-0.137	0	neutral
	1957	C17orf78	284099	17q12	-0.405	0	neutral
	1958	C17orf79	55352	17q11.2	-0.405	0	neutral
	1959	C17orf80	55028	17q25.1	-0.246	0	neutral
	1960	C17orf81	23587	17p13.1	0	0	neutral
	1961	C17orf82	388407	17q23.2	-0.405	-0.33	loss
	1962	C17orf85	55421	17p13.2	0	0	neutral
	1963	C17orf89	284184	17q25.3	0	0	neutral
	1964	C17orf90	339229	17q25.3	0	0	neutral
	1965	C17orf96	100170841	17q12	-0.405	0	neutral
	1966	C17orf97	400566	17p13.3	0	0	neutral
	1967	C17orf98	388381	17q12	-0.405	0	neutral
	1968	C17orf99	100141515	17q25.3	0	0	neutral
	1969	C18orf1	753	18p11.21	-0.154	0	neutral
	1970	C18orf21	83608	18q12.2	-0.148	0	neutral
	1971	C18orf25	147339	18q21.1	-0.112	0	neutral
	1972	C18orf26	284254	18q21.2	-0.187	0	neutral
	1973	C18orf32	497661	18q21.1	-0.207	0	neutral
	1974	C18orf34	374864	18q12.1	-0.575	0	neutral
	1975	C18orf42	642597	18p11.31	0	0	neutral
	1976	C18orf54	162681	18q21.2	-0.187	0	neutral
	1977	C18orf56	494514	18p11.32	0	0	neutral
	1978	C18orf62	284274	18q23	0	0	neutral
	1979	C18orf63	644041	18q22.3	0	0	neutral
	1980	C18orf8	29919	18q11.2	-0.154	0	neutral
	1981	C19orf10	56005	19p13.3	-0.149	-0.155	neutral
	1982	C19orf12	83636	19q12	0	0	neutral
	1983	C19orf18	147685	19q13.43	0.124	0	neutral
	1984	C19orf21	126353	19p13.3	-0.149	-0.155	neutral
	1985	C19orf24	55009	19p13.3	-0.149	-0.155	neutral
	1986	C19orf25	148223	19p13.3	-0.149	-0.155	neutral
	1987	C19orf26	255057	19p13.3	-0.149	-0.155	neutral
	1988	C19orf29	58509	19p13.3	-0.149	-0.155	neutral
	1989	C19orf29-AS1	404665	19p13.3	-0.149	-0.155	neutral
	1990	C19orf33	64073	19q13.2	0	0	neutral
	1991	C19orf35	374872	19p13.3	-0.149	-0.155	neutral
	1992	C19orf38	255809	19p13.2	-0.149	-0.155	neutral
	1993	C19orf40	91442	19q13.11	0	0	neutral
	1994	C19orf42	79086	19p13.11	0.287	0	neutral
	1995	C19orf43	79002	19p13.2	-0.149	-0.155	neutral
	1996	C19orf44	84167	19p13.11	0.287	0	neutral
	1997	C19orf45	374877	19p13.2	-0.149	-0.155	neutral
	1998	C19orf46	163183	19q13.12	0	0	neutral
	1999	C19orf47	126526	19q13.2	0	0	neutral
[truncated: 20,232 more rows]
